# Supplementary material for: Distinct landscapes of deleterious variants in DNA damage repair system in ethnic human populations
Source: Life Sci Alliance. 2022 May 20;5(9):e202101319. doi: 10.26508/lsa.202101319 (PMC9122833; doi:10.26508/lsa.202101319)
Supplement: Supplementary file 3 [file LSA-2021-01319_TableS3.xlsx]

## Sheet: S3A
Supplementary Table 3A. Deleterious variants in single population
Chr	Start	End	Ref	Alt	Consequence	Region	Symbol	Feature	HGVSc	HGVSp	ClinVar_SIG_20210501	ClinVar_DIS	ClinVar_ID	dbSNP	COSMIC_ID	COSMIC_DIS	1000G_ALL	ExAC_Freq	gnomAD_exome_ALL
Chinese
1	45330558	45330558	C	T	splice_acceptor_variant	coding	MUTYH	NM_001048174.2	c.1393-1G>A	-	Likely_pathogenic	MYH-associated_polyposis	RCV000410065.1	.	.	.	.	.	.
2	214781066	214781066	C	A	stop_gained	coding	BARD1	NM_000465.4	c.808G>T	p.Glu270Ter	Pathogenic	.	.	.	.	.	.	.	.
2	214781384	214781384	G	A	stop_gained	coding	BARD1	NM_000465.4	c.490C>T	p.Gln164Ter	Pathogenic	.	.	.	COSM1591868;COSM1016075	1(endometrium)	.	.	.
2	47403219	47403219	C	T	stop_gained	coding	MSH2	NM_000251.3	c.28C>T	p.Gln10Ter	Pathogenic	not_provided\x2cLynch_syndrome	RCV000034557.1\x2cRCV000076557.2	rs63751099	.	.	.	.	.
2	47410373	47410373	G	A	splice_donor_variant	coding	MSH2	NM_000251.3	c.645+1G>A	-	Pathogenic	Lynch_syndrome\x2cLynch_syndrome|Hereditary_cancer-predisposing_syndrome	RCV000076659.2\x2cRCV000076660.2|RCV000220374.1	rs267607689	COSM330654	1(large_intestine)	.	.	.
2	47800078	47800078	G	T	stop_gained	coding	MSH6	NM_000179.3	c.2095G>T	p.Glu699Ter	Likely_pathogenic	.	.	.	.	.	.	.	.
2	47800705	47800709	GAATT	-	frameshift_variant	coding	MSH6	NM_000179.3	c.2725_2729del	p.Leu909ProfsTer7	Pathogenic	.	.	.	.	.	.	.	.
3	10041621	10041621	A	T	splice_acceptor_variant	coding	FANCD2	NM_001018115.3	c.696-2A>T	-	Pathogenic	.	.	.	.	.	.	.	.
3	14158179	14158179	A	T	stop_gained	coding	XPC	NM_004628.5	c.1704T>A	p.Tyr568Ter	Pathogenic	.	.	.	.	.	.	.	.
3	14165468	14165468	G	A	stop_gained	coding	XPC	NM_004628.5	c.739C>T	p.Arg247Ter	Pathogenic	.	.	rs764321665	.	.	.	0	0
3	48466792	48466792	-	C	3_prime_UTR_variant	coding	ATRIP	NM_130384.3	c.*1245dup	-	Pathogenic/Likely_pathogenic	Aicardi_Goutieres_syndrome_1	RCV000266019.1	rs748914604	COSM4612154	1(large_intestine)	.	0.0002	6.51e-05
3	48466945	48466945	G	A	3_prime_UTR_variant	coding	ATRIP	NM_130384.3	c.*1391G>A	-	Pathogenic/Likely_pathogenic	.	.	rs200773268	.	.	0.0002	4.13e-05	6.55e-05
3	48467277	48467277	-	GTCA	3_prime_UTR_variant	coding	ATRIP	NM_130384.3	c.*1726_*1729dup	-	Pathogenic	Aicardi_Goutieres_syndrome_1	RCV000114333.2	rs78948846	.	.	.	8.26e-06	8.13e-06
5	132588745	132588745	A	-	frameshift_variant	coding	RAD50	NM_005732.4	c.1111del	p.Ile371PhefsTer8	Pathogenic	.	.	.	.	.	.	.	.
5	132609171	132609171	G	T	stop_gained	coding	RAD50	NM_005732.4	c.2884G>T	p.Glu962Ter	Pathogenic	.	.	.	.	.	.	.	.
5	132616001	132616001	A	G	splice_acceptor_variant	coding	RAD50	NM_005732.4	c.3037-2A>G	-	Likely_pathogenic	.	.	.	.	.	.	.	.
5	75598084	75598084	T	C	3_prime_UTR_variant	coding	POLK	NM_016218.3	c.*66T>C	-	Pathogenic	Malignant_tumor_of_prostate	RCV000170553.1	rs786205688	.	.	.	.	.
6	35462915	35462915	G	A	splice_donor_variant	coding	FANCE	NM_021922.3	c.1509+1G>A	-	Likely_pathogenic	.	.	rs745877509	.	.	.	.	.
7	5977759	5977759	T	G	splice_acceptor_variant	coding	PMS2	NM_000535.7	c.2276-2A>C	-	Likely_pathogenic	.	.	.	.	.	.	.	.
7	5986806	5986806	A	T	stop_gained	coding	PMS2	NM_000535.7	c.1959T>A	p.Cys653Ter	Pathogenic	.	.	.	.	.	.	.	.
7	5987034	5987034	-	T	frameshift_variant	coding	PMS2	NM_000535.7	c.1730dup	p.Arg578AlafsTer3	Pathogenic	Lynch_syndrome	RCV000076822.2	rs587779330	.	.	.	.	.
7	5987525	5987525	-	T	frameshift_variant	coding	PMS2	NM_000535.7	c.1239dup	p.Asp414ArgfsTer44	Pathogenic	Lynch_syndrome	RCV000200079.2	rs758048239	.	.	.	.	.
8	89955282	89955282	C	-	splice_donor_variant	coding	NBN	NM_002485.5	c.1397+1del	-	Pathogenic	.	.	.	.	.	.	.	.
8	89970459	89970459	-	C	frameshift_variant	coding	NBN	NM_002485.5	c.800dup	p.Thr268AsnfsTer5	Pathogenic/Likely_pathogenic	.	.	.	.	.	.	.	.
9	35078700	35078700	A	G	missense_variant	coding	FANCG	NM_004629.2	c.212T>C	p.Leu71Pro	Pathogenic	.	.	.	.	.	.	.	.
9	95111610	95111610	C	T	stop_gained	coding	FANCC	NM_000136.3	c.1182G>A	p.Trp394Ter	Likely_pathogenic	.	.	.	.	.	.	.	.
9	97687222	97687223	CT	-	frameshift_variant	coding	XPA	NM_000380.4	c.428_429del	p.Glu143GlyfsTer11	Likely_pathogenic	.	.	.	.	.	.	.	.
10	49460453	49460453	T	C	splice_acceptor_variant	coding	ERCC6	NM_000124.4	c.3984-2A>G	-	Likely_pathogenic	.	.	.	.	.	.	.	.
10	49524649	49524649	-	GG	frameshift_variant	coding	ERCC6	NM_000124.4	c.779_780dup	p.Arg261ProfsTer69	Likely_pathogenic	.	.	.	.	.	.	.	.
10	68437011	68437014	CTGT	-	frameshift_variant,splice_region_variant	coding	DNA2	NM_001080449.3	c.1643_1646del	p.Asp548GlufsTer14	Likely_pathogenic	not_provided	RCV000255644.1	rs768077989	.	.	.	8.48e-06	.
11	108250832	108250832	-	A	frameshift_variant	coding	ATM	NM_000051.4	c.1368dup	p.Arg457ThrfsTer30	Pathogenic	.	.	.	.	.	.	.	.
11	108271147	108271147	G	C	splice_donor_variant	coding	ATM	NM_000051.4	c.2921+1G>C	-	Pathogenic/Likely_pathogenic	Hereditary_cancer-predisposing_syndrome|Ataxia-telangiectasia_syndrome|not_provided\x2cAtaxia-telangiectasia_syndrome|Hereditary_cancer-predisposing_syndrome|not_provided\x2cHereditary_cancer-predisposing_syndrome|Ataxia-telangiectasia_syndrome	RCV000129576.4|RCV000169059.1|RCV000215085.2\x2cRCV000167947.2|RCV000217319.1|RCV000236109.2\x2cRCV000130866.3|RCV000233536.2	rs587781558	COSM5945833	1(NS)	.	.	4.06e-06
11	108289748	108289748	G	A	stop_gained	coding	ATM	NM_000051.4	c.4383G>A	p.Trp1461Ter	Pathogenic	.	.	.	.	.	.	.	.
11	108297334	108297334	C	T	stop_gained	coding	ATM	NM_000051.4	c.4957C>T	p.Gln1653Ter	Pathogenic	.	.	.	.	.	.	.	.
11	108307919	108307919	C	A	stop_gained	coding	ATM	NM_000051.4	c.5697C>A	p.Cys1899Ter	Pathogenic	.	.	rs753839301	COSM5024999;COSM5025000	1(breast)	.	8.36e-06	.
11	108335940	108335940	-	T	frameshift_variant	coding	ATM	NM_000051.4	c.8249dup	p.Leu2750PhefsTer7	Pathogenic	.	.	.	.	.	.	.	.
11	94435900	94435900	C	A	splice_acceptor_variant	coding	MRE11	NM_005591.4	c.1927-1G>T	-	Likely_pathogenic	.	.	.	.	.	.	.	.
11	94464111	94464111	A	T	splice_donor_variant	coding	MRE11	NM_005591.4	c.1225+2T>A	-	Likely_pathogenic	.	.	.	.	.	.	.	.
11	94492799	94492799	C	A	start_lost	coding	MRE11	NM_005591.4	c.3G>T	p.Met1?	Likely_pathogenic	.	.	.	.	.	.	.	.
13	102862320	102862320	-	T	frameshift_variant	coding	BIVM-ERCC5	NM_001204425.2	c.2535dup	p.Lys846Ter	Likely_pathogenic	.	.	.	.	.	.	.	.
13	102862320	102862320	-	T	frameshift_variant	coding	ERCC5	NM_000123.4	c.1173dup	p.Lys392Ter	Likely_pathogenic	.	.	.	.	.	.	.	.
13	32336631	32336632	TT	-	frameshift_variant	coding	BRCA2	NM_000059.4	c.2278_2279del	p.Leu760IlefsTer2	Pathogenic	Breast-ovarian_cancer\x2c_familial_2	RCV000257659.2	.	.	.	.	.	.
13	32336764	32336764	T	G	stop_gained	coding	BRCA2	NM_000059.4	c.2409T>G	p.Tyr803Ter	Pathogenic	Hereditary_breast_and_ovarian_cancer_syndrome\x2cBreast-ovarian_cancer\x2c_familial_2|Hereditary_breast_and_ovarian_cancer_syndrome|not_provided	RCV000227043.1\x2cRCV000031365.6|RCV000043984.5|RCV000212221.2	rs80358504	.	.	.	.	.
13	32337141	32337141	T	G	stop_gained	coding	BRCA2	NM_000059.4	c.2786T>G	p.Leu929Ter	Pathogenic	.	.	.	.	.	.	.	.
13	32337198	32337198	T	-	frameshift_variant	coding	BRCA2	NM_000059.4	c.2845del	p.Tyr949MetfsTer11	Pathogenic	Familial_cancer_of_breast|Breast-ovarian_cancer\x2c_familial_2	RCV000044074.2|RCV000257690.2	rs397507644	.	.	.	.	.
13	32337464	32337464	C	T	stop_gained	coding	BRCA2	NM_000059.4	c.3109C>T	p.Gln1037Ter	Pathogenic	Breast-ovarian_cancer\x2c_familial_2|Hereditary_breast_and_ovarian_cancer_syndrome|not_provided|Hereditary_cancer-predisposing_syndrome	RCV000031400.6|RCV000044120.5|RCV000160056.2|RCV000216711.1	rs80358557	.	.	.	.	4.09e-06
13	32338718	32338718	G	T	stop_gained	coding	BRCA2	NM_000059.4	c.4363G>T	p.Glu1455Ter	Pathogenic	.	.	.	.	.	.	.	.
13	32338733	32338734	TT	-	frameshift_variant	coding	BRCA2	NM_000059.4	c.4380_4381del	p.Ser1461LeufsTer4	Pathogenic	Familial_cancer_of_breast|Breast-ovarian_cancer\x2c_familial_2	RCV000044402.2|RCV000239281.2	rs397507715	.	.	.	.	.
13	32339395	32339396	TG	-	frameshift_variant	coding	BRCA2	NM_000059.4	c.5042_5043del	p.Val1681GlufsTer7	Pathogenic	Breast-ovarian_cancer\x2c_familial_2|Hereditary_breast_and_ovarian_cancer_syndrome|Hereditary_cancer-predisposing_syndrome|not_provided	RCV000031521.6|RCV000044543.3|RCV000217031.1|RCV000221298.1	rs80359478	.	.	.	.	.
13	32339699	32339699	C	-	frameshift_variant	coding	BRCA2	NM_000059.4	c.5344del	p.Gln1782LysfsTer9	Pathogenic	.	.	.	.	.	.	.	.
13	32340054	32340054	C	G	stop_gained	coding	BRCA2	NM_000059.4	c.5699C>G	p.Ser1900Ter	Pathogenic	Familial_cancer_of_breast|Breast-ovarian_cancer\x2c_familial_2\x2cHereditary_cancer-predisposing_syndrome	RCV000044721.2|RCV000257227.2\x2cRCV000215854.1	.	.	.	.	.	.
13	32340817	32340818	TC	-	frameshift_variant	coding	BRCA2	NM_000059.4	c.6468_6469del	p.Gln2157IlefsTer18	Pathogenic	Breast-ovarian_cancer\x2c_familial_2|Hereditary_breast_and_ovarian_cancer_syndrome|Hereditary_cancer-predisposing_syndrome|not_provided|not_specified	RCV000031629.7|RCV000044965.4|RCV000131035.3|RCV000160302.3|RCV000239247.1	rs80359597	COSM5547326;COSM5547325	1(prostate)	.	.	.
13	32355004	32355004	A	-	frameshift_variant	coding	BRCA2	NM_000059.4	c.7152del	p.Val2385PhefsTer9	Pathogenic	Breast-ovarian_cancer\x2c_familial_2	RCV000256974.2	.	.	.	.	.	.
13	32362580	32362580	-	A	frameshift_variant	coding	BRCA2	NM_000059.4	c.7865dup	p.Asn2622LysfsTer4	Pathogenic	Breast-ovarian_cancer\x2c_familial_2	RCV000256773.2	.	.	.	.	.	.
13	32379513	32379513	C	G	stop_gained,splice_region_variant	coding	BRCA2	NM_000059.4	c.8951C>G	p.Ser2984Ter	Pathogenic	Breast-ovarian_cancer\x2c_familial_2|Hereditary_breast_and_ovarian_cancer_syndrome\x2cFamilial_cancer_of_breast|Breast-ovarian_cancer\x2c_familial_2	RCV000257587.2|RCV000472639.1\x2cRCV000045665.2|RCV000114019.3	rs80359146	.	.	.	.	.
13	32379885	32379885	-	A	frameshift_variant	coding	BRCA2	NM_000059.4	c.9097dup	p.Thr3033AsnfsTer11	Pathogenic	Breast-ovarian_cancer\x2c_familial_2|not_provided|Hereditary_cancer-predisposing_syndrome|Hereditary_breast_and_ovarian_cancer_syndrome|Breast-ovarian_cancer\x2c_familial_1	RCV000031791.7|RCV000045711.6|RCV000130439.3|RCV000195406.2|RCV000210094.1	rs754205122	COSM2071556;COSM2071555	1(breast);9(upper_aerodigestive_tract)	.	9.62e-05	1.66e-05
13	50948073	50948073	G	A	splice_region_variant,intron_variant	coding	RNASEH2B	NM_024570.4	c.698+5G>A	-	Likely_pathogenic	.	.	.	.	.	.	.	.
14	45164554	45164554	C	T	stop_gained	coding	FANCM	NM_020937.4	c.1777C>T	p.Arg593Ter	Pathogenic	.	.	rs773014744	.	.	.	.	.
15	89258854	89258854	G	A	intron_variant	noncoding	FANCI	NM_001113378.2	c.157+78G>A	-	Pathogenic	.	.	.	.	.	.	.	.
15	89301445	89301445	A	G	splice_region_variant,intron_variant	coding	FANCI	NM_001113378.2	c.3006+3A>G	-	Pathogenic	.	.	.	.	.	.	.	.
15	89312913	89312913	A	-	frameshift_variant	coding	FANCI	NM_001113378.2	c.3662del	p.Lys1221ArgfsTer3	Pathogenic	.	.	.	.	.	.	.	.
15	90749845	90749846	TT	-	frameshift_variant	coding	BLM	NM_000057.4	c.581_582del	p.Phe194Ter	Pathogenic/Likely_pathogenic	Bloom_syndrome	RCV000169422.1	rs786204640	.	.	.	8.39e-06	.
15	90754810	90754810	G	A	splice_acceptor_variant	coding	BLM	NM_000057.4	c.960-1G>A	-	Likely_pathogenic	.	.	.	.	.	.	.	.
15	90760909	90760909	A	-	frameshift_variant	coding	BLM	NM_000057.4	c.1544del	p.Asn515MetfsTer16	Pathogenic	Bloom_syndrome	RCV000415444.1	rs772495493	COSM252959	1(salivary_gland);1(ovary);1(breast);1(stomach);17(large_intestine)	.	0.0004	2.95e-05
15	90793909	90793909	A	G	intron_variant	noncoding	BLM	NM_000057.4	c.3020-258A>G	-	Pathogenic	.	.	.	.	.	.	.	.
16	23614092	23614092	C	T	splice_acceptor_variant	coding	PALB2	NM_024675.4	c.3114-1G>A	-	Likely_pathogenic	not_provided	RCV000255848.1	.	.	.	.	.	.
16	23624082	23624082	-	T	frameshift_variant	coding	PALB2	NM_024675.4	c.2760dup	p.Gln921ThrfsTer7	Pathogenic	Hereditary_cancer-predisposing_syndrome	RCV000223425.1	.	.	.	.	.	.
16	23635487	23635487	T	-	frameshift_variant	coding	PALB2	NM_024675.4	c.1059del	p.Lys353AsnfsTer3	Pathogenic/Likely_pathogenic	Hereditary_cancer-predisposing_syndrome|Familial_cancer_of_breast	RCV000160814.1|RCV000230419.2	rs730881872	.	.	.	.	.
16	23635795	23635795	G	A	stop_gained	coding	PALB2	NM_024675.4	c.751C>T	p.Gln251Ter	Pathogenic	Familial_cancer_of_breast|Hereditary_cancer-predisposing_syndrome|not_provided	RCV000114657.1|RCV000210097.2|RCV000413603.1	rs180177091	.	.	.	.	.
16	89745063	89745065	CCA	-	inframe_deletion	coding	FANCA	NM_000135.4	c.3520_3522del	p.Trp1174del	Pathogenic	.	.	.	.	.	.	.	.
16	89748658	89748658	C	T	splice_donor_variant	coding	FANCA	NM_000135.4	c.3348+1G>A	-	Pathogenic	.	.	rs751266148	.	.	.	8.44e-06	4.07e-06
16	89749781	89749781	C	T	stop_gained	coding	FANCA	NM_000135.4	c.3188G>A	p.Trp1063Ter	Pathogenic	.	.	.	.	.	.	.	.
16	89765001	89765001	G	-	frameshift_variant	coding	FANCA	NM_000135.4	c.2667del	p.Ser890AlafsTer31	Likely_pathogenic	.	.	.	.	.	.	.	.
17	43045749	43045749	T	-	frameshift_variant	coding	BRCA1	NM_007294.4	c.5521del	p.Ser1841ValfsTer2	Pathogenic	Hereditary_breast_and_ovarian_cancer_syndrome|Breast-ovarian_cancer\x2c_familial_1	RCV000049034.4|RCV000112693.3	rs80357721	.	.	.	.	.
17	43045793	43045800	TGCCCAAT	-	frameshift_variant,splice_region_variant	coding	BRCA1	NM_007294.4	c.5470_5477del	p.Ile1824AspfsTer3	Pathogenic	Hereditary_breast_and_ovarian_cancer_syndrome|Breast-ovarian_cancer\x2c_familial_1|Hereditary_cancer-predisposing_syndrome|Breast_cancer	RCV000049010.3|RCV000112668.3|RCV000131859.3|RCV000240711.1	rs80357973	.	.	.	.	.
17	43071080	43071080	G	A	stop_gained	coding	BRCA1	NM_007294.4	c.4834C>T	p.Gln1612Ter	Pathogenic	Hereditary_cancer-predisposing_syndrome|Breast-ovarian_cancer\x2c_familial_1	RCV000164690.1|RCV000241386.2	rs786202064	.	.	.	.	.
17	43082422	43082422	-	TTCT	frameshift_variant	coding	BRCA1	NM_007294.4	c.4335_4338dup	p.Gln1447ArgfsTer16	Pathogenic	.	.	rs397509164	.	.	.	.	.
17	43082564	43082564	G	-	frameshift_variant	coding	BRCA1	NM_007294.4	c.4197del	p.Met1400CysfsTer5	Pathogenic	Breast-ovarian_cancer\x2c_familial_1	RCV000257209.2	.	.	.	.	.	.
17	43091518	43091518	T	-	frameshift_variant	coding	BRCA1	NM_007294.4	c.4013del	p.Lys1338ArgfsTer28	Pathogenic	Breast-ovarian_cancer\x2c_familial_1	RCV000241274.2	.	.	.	.	.	.
17	43092202	43092206	TTTTT	-	frameshift_variant	coding	BRCA1	NM_007294.4	c.3325_3329del	p.Lys1109AlafsTer4	Pathogenic	Familial_cancer_of_breast|Breast-ovarian_cancer\x2c_familial_1	RCV000048143.2|RCV000112061.2	rs80357680	.	.	.	.	.
17	43092809	43092809	C	A	stop_gained	coding	BRCA1	NM_007294.4	c.2722G>T	p.Glu908Ter	Pathogenic	Hereditary_breast_and_ovarian_cancer_syndrome|not_provided|Breast-ovarian_cancer\x2c_familial_1|Hereditary_cancer-predisposing_syndrome|Breast_cancer|not_specified	RCV000047943.4|RCV000074576.7|RCV000077527.6|RCV000131878.3|RCV000148387.1|RCV000239255.1	rs80356978	.	.	.	.	.
17	43094066	43094066	C	A	stop_gained	coding	BRCA1	NM_007294.4	c.1465G>T	p.Glu489Ter	Pathogenic	Familial_cancer_of_breast|Breast-ovarian_cancer\x2c_familial_1\x2cFamilial_cancer_of_breast|Breast-ovarian_cancer\x2c_familial_1	RCV000047486.2|RCV000256732.2\x2cRCV000047485.2|RCV000111625.1	rs80357167	.	.	.	.	.
17	43094390	43094390	T	A	stop_gained	coding	BRCA1	NM_007294.4	c.1141A>T	p.Lys381Ter	Pathogenic	Familial_cancer_of_breast|Breast-ovarian_cancer\x2c_familial_1	RCV000047359.2|RCV000111561.3	rs80357385	.	.	.	.	.
17	58709857	58709857	A	C	splice_acceptor_variant	coding	RAD51C	NM_058216.3	c.706-2A>C	-	Likely_pathogenic	.	.	.	.	.	.	.	.
17	61849155	61849159	TTCTT	-	frameshift_variant	coding	BRIP1	NM_032043.3	c.477_481del	p.Lys159AsnfsTer11	Pathogenic/Likely_pathogenic	.	.	.	.	.	.	.	.
17	61861526	61861526	C	T	stop_gained	coding	BRIP1	NM_032043.3	c.14G>A	p.Trp5Ter	Likely_pathogenic	.	.	.	.	.	.	.	.
22	28695243	28695243	C	T	splice_acceptor_variant	coding	CHEK2	NM_007194.4	c.1260-1G>A	-	Likely_pathogenic	Hereditary_cancer-predisposing_syndrome	RCV000164426.1	rs786201906	.	.	.	.	.
22	28696929	28696929	G	C	stop_gained	coding	CHEK2	NM_007194.4	c.1067C>G	p.Ser356Ter	Pathogenic	.	.	.	.	.	.	.	.
22	28703504	28703504	C	T	splice_donor_variant	coding	CHEK2	NM_007194.4	c.908+1G>A	-	Likely_pathogenic	not_provided\x2cHereditary_cancer-predisposing_syndrome	RCV000219083.1\x2cRCV000129866.2	rs587781699	.	.	.	.	0
22	28710005	28710005	C	T	splice_donor_variant	coding	CHEK2	NM_007194.4	c.846+1G>A	-	Likely_pathogenic	.	.	.	.	.	.	.	.
22	28725242	28725242	C	-	splice_donor_variant	coding	CHEK2	NM_007194.4	c.444+1del	-	Pathogenic/Likely_pathogenic	.	.	.	.	.	.	.	.
22	28725270	28725270	G	T	stop_gained	coding	CHEK2	NM_007194.4	c.417C>A	p.Tyr139Ter	Pathogenic	.	.	.	.	.	.	.	.
22	28725323	28725323	C	-	frameshift_variant	coding	CHEK2	NM_007194.4	c.364del	p.Glu122AsnfsTer9	Pathogenic	Hereditary_cancer-predisposing_syndrome	RCV000166630.1	rs786203355	.	.	.	.	.
22	28734694	28734694	G	A	stop_gained	coding	CHEK2	NM_007194.4	c.28C>T	p.Gln10Ter	Pathogenic	.	.	.	COSM5521187;COSM5521186	1(biliary_tract)	.	.	.
Japanese
2	47403373	47403373	-	G	frameshift_variant	coding	MSH2	NM_000251.3	c.187dup	p.Val63GlyfsTer19	Pathogenic	Lynch_syndrome\x2cLynch_syndrome	RCV000076308.2\x2cRCV000076311.2	rs281864942	.	.	.	.	.
2	47478493	47478493	T	G	stop_gained	coding	MSH2	NM_000251.3	c.2432T>G	p.Leu811Ter	Pathogenic	Lynch_syndrome	RCV000076473.2	rs63751018	.	.	.	.	.
2	58226733	58226733	G	-	frameshift_variant	coding	FANCL	NM_018062.4	c.268del	p.Leu90PhefsTer6	Pathogenic	Fanconi_anemia\x2c_complementation_group_L	RCV000191022.2	.	.	.	.	.	.
3	142555897	142555897	-	T	frameshift_variant	coding	ATR	NM_001184.4	c.2320dup	p.Ile774AsnfsTer3	Pathogenic	.	.	rs778867790	COSM1617015	1(liver);1(large_intestine);3(endometrium)	.	0.0034	0.0032
3	37042267	37042267	G	A	splice_acceptor_variant	coding	MLH1	NM_000249.4	c.1668-1G>A	-	Likely_pathogenic	Lynch_syndrome|Hereditary_cancer-predisposing_syndrome\x2cLynch_syndrome	RCV000075300.2|RCV000214110.1\x2cRCV000075301.2	rs267607845	.	.	.	.	.
5	80675095	80675095	-	A	frameshift_variant	coding	MSH3	NM_002439.5	c.1148dup	p.Asn385GlnfsTer19	Pathogenic	.	.	.	COSM4703347;COSM4703346	1(large_intestine)	.	.	4.11e-06
6	43614076	43614076	A	-	frameshift_variant	coding	POLH	NM_006502.3	c.1664del	p.Asn555ThrfsTer30	Pathogenic	Xeroderma_pigmentosum\x2c_variant_type	RCV000244978.1	.	.	.	.	.	.
10	49476217	49476217	G	A	stop_gained,splice_region_variant	coding	ERCC6	NM_000124.4	c.2380C>T	p.Gln794Ter	Likely_pathogenic	.	.	.	.	.	.	.	.
11	108244923	108244923	G	A	stop_gained	coding	ATM	NM_000051.4	c.798G>A	p.Trp266Ter	Pathogenic	.	.	.	.	.	.	.	.
11	108248988	108248989	AA	-	frameshift_variant	coding	ATM	NM_000051.4	c.1122_1123del	p.Glu376IlefsTer2	Pathogenic/Likely_pathogenic	.	.	.	.	.	.	.	.
11	108321299	108321299	A	G	splice_acceptor_variant	coding	ATM	NM_000051.4	c.6453-2A>G	-	Likely_pathogenic	.	.	rs539978799	.	.	.	.	.
12	101729231	101729234	AAGT	-	intron_variant	noncoding	SYCP3	NM_001177949.2	c.553-21_553-18del	-	Pathogenic	Spermatogenesis_arrest	RCV000005703.3	rs587776620	.	.	.	8.79e-06	4.12e-06
12	109103562	109103562	T	C	missense_variant	coding	UNG	NM_080911.3	c.752T>C	p.Phe251Ser	Pathogenic	Immunodeficiency_with_hyper_IgM_type_5	RCV000013086.26	rs104894380	.	.	.	.	.
13	32337440	32337440	-	T	frameshift_variant	coding	BRCA2	NM_000059.4	c.3086dup	p.Met1029IlefsTer7	Pathogenic	.	.	.	.	.	.	.	.
13	32339125	32339126	GT	-	frameshift_variant	coding	BRCA2	NM_000059.4	c.4772_4773del	p.Cys1591Ter	Pathogenic	.	.	.	.	.	.	.	.
13	32346841	32346841	C	T	stop_gained	coding	BRCA2	NM_000059.4	c.6952C>T	p.Arg2318Ter	Pathogenic	Hereditary_breast_and_ovarian_cancer_syndrome\x2cBreast-ovarian_cancer\x2c_familial_2|Hereditary_breast_and_ovarian_cancer_syndrome|not_provided|Breast_cancer	RCV000461532.1\x2cRCV000031658.6|RCV000045095.6|RCV000212256.2|RCV000240678.1	rs80358920	.	.	.	.	.
13	32356577	32356577	G	-	frameshift_variant	coding	BRCA2	NM_000059.4	c.7586del	p.Gly2529AlafsTer22	Pathogenic	.	.	.	.	.	.	.	.
14	45173084	45173084	-	CT	frameshift_variant	coding	FANCM	NM_020937.4	c.2201_2202dup	p.Glu735LeufsTer26	Likely_pathogenic	.	.	.	COSM1369851	2(large_intestine)	.	.	.
15	90749825	90749827	CAA	-	stop_gained,inframe_deletion	coding	BLM	NM_000057.4	c.557_559del	p.Ser186_Lys187delinsTer	Pathogenic	Bloom_syndrome	RCV000005788.2	rs367543035	.	.	.	.	.
15	90761074	90761074	G	A	stop_gained	coding	BLM	NM_000057.4	c.1701G>A	p.Trp567Ter	Pathogenic/Likely_pathogenic	.	.	.	.	.	.	.	.
15	90804361	90804361	T	C	splice_donor_variant	coding	BLM	NM_000057.4	c.3751+2T>C	-	Likely_pathogenic	.	.	.	.	.	.	.	.
16	23624007	23624007	A	G	splice_donor_variant	coding	PALB2	NM_024675.4	c.2834+2T>C	-	Likely_pathogenic	.	.	.	.	.	.	.	.
16	23629684	23629684	A	-	frameshift_variant	coding	PALB2	NM_024675.4	c.2470del	p.Cys824ValfsTer27	Pathogenic	Hereditary_cancer-predisposing_syndrome	RCV000217072.2	.	.	.	.	.	.
16	23636074	23636074	G	A	stop_gained	coding	PALB2	NM_024675.4	c.472C>T	p.Gln158Ter	Likely_pathogenic	not_provided	RCV000237059.1	.	.	.	.	.	.
16	89765068	89765068	T	A	splice_acceptor_variant	coding	FANCA	NM_000135.4	c.2602-2A>T	-	Pathogenic	.	.	.	.	.	.	.	.
16	89770616	89770616	T	G	missense_variant	coding	FANCA	NM_000135.4	c.2170A>C	p.Thr724Pro	Pathogenic	.	.	.	.	.	.	.	.
16	89816547	89816572	GGCCCAGGCCCTCCGGCGGCCCCCTG	-	frameshift_variant	coding	FANCA	NM_000135.4	c.44_69del	p.Pro15ArgfsTer13	Pathogenic	.	.	.	.	.	.	.	.
17	43045712	43045712	T	C	missense_variant	coding	BRCA1	NM_007294.4	c.5558A>G	p.Tyr1853Cys	Pathogenic/Likely_pathogenic	Familial_cancer_of_breast|Breast-ovarian_cancer\x2c_familial_1	RCV000049049.2|RCV000112703.1	rs80357258	.	.	.	.	.
17	43092317	43092317	G	-	frameshift_variant	coding	BRCA1	NM_007294.4	c.3214del	p.Leu1072Ter	Pathogenic	Hereditary_breast_and_ovarian_cancer_syndrome|Breast-ovarian_cancer\x2c_familial_1	RCV000048101.3|RCV000112030.3	rs80357923	.	.	.	.	.
17	43092731	43092731	G	A	stop_gained	coding	BRCA1	NM_007294.4	c.2800C>T	p.Gln934Ter	Pathogenic	Hereditary_breast_and_ovarian_cancer_syndrome|Breast-ovarian_cancer\x2c_familial_1|not_provided	RCV000047973.3|RCV000077528.5|RCV000236201.2	rs80357223	.	.	.	.	.
17	43106480	43106480	A	T	stop_gained	coding	BRCA1	NM_007294.4	c.188T>A	p.Leu63Ter	Pathogenic	Familial_cancer_of_breast\x2cHereditary_breast_and_ovarian_cancer_syndrome|Breast-ovarian_cancer\x2c_familial_1|Hereditary_cancer-predisposing_syndrome|Breast_cancer	RCV000047621.2\x2cRCV000047620.3|RCV000077499.7|RCV000162847.2|RCV000413802.1	rs80357086	.	.	.	8.41e-06	0
17	58709991	58709991	G	C	splice_donor_variant	coding	RAD51C	NM_058216.3	c.837+1G>C	-	Likely_pathogenic	.	.	.	.	.	.	.	.
19	45354774	45354774	T	G	missense_variant	coding	ERCC2	NM_000400.4	c.1621A>C	p.Ser541Arg	Pathogenic	Xeroderma_pigmentosum\x2c_group_D	RCV000018272.29	rs121913019	.	.	0.0002	8.24e-06	4.06e-06
22	28703568	28703580	TAAGAAGAGGGGG	-	splice_acceptor_variant,intron_variant	coding	CHEK2	NM_007194.4	c.847-14_847-2del	-	Likely_pathogenic	.	.	.	.	.	.	.	.
Korean
2	219157495	219157495	A	G	missense_variant	coding	NHEJ1	NM_024782.3	c.367T>C	p.Cys123Arg	Pathogenic	Severe_combined_immunodeficiency_with_microcephaly\x2c_growth_retardation\x2c_and_sensitivity_to_ionizing_radiation	RCV000001033.4	rs118204452	.	.	.	8.26e-06	4.06e-06
2	47805010	47805010	C	G	stop_gained	coding	MSH6	NM_000179.3	c.3539C>G	p.Ser1180Ter	Pathogenic	.	.	rs766905993	.	.	.	1.65e-05	8.13e-06
9	97687191	97687192	CA	-	stop_gained,frameshift_variant	coding	XPA	NM_000380.4	c.459_460del	p.Cys153Ter	Likely_pathogenic	.	.	.	.	.	.	.	4.09e-06
10	49500698	49500698	T	C	splice_acceptor_variant	coding	ERCC6	NM_000124.4	c.1527-2A>G	-	Likely_pathogenic	.	.	rs768608345	.	.	.	8.28e-06	0
11	108268389	108268401	ATGAGTGCTTTTT	-	intron_variant	noncoding	ATM	NM_000051.4	c.2639-19_2639-7del	-	Likely_pathogenic	.	.	.	.	.	.	.	.
12	101729231	101729234	AAGT	-	intron_variant	noncoding	SYCP3	NM_001177949.2	c.553-21_553-18del	-	Pathogenic	Spermatogenesis_arrest	RCV000005703.3	rs587776620	.	.	.	8.79e-06	4.12e-06
13	108209928	108209928	C	A	missense_variant	coding	LIG4	NM_206937.2	c.1341G>T	p.Trp447Cys	Pathogenic	.	.	rs780504243	.	.	.	2.47e-05	1.22e-05
13	32332877	32332877	A	T	stop_gained	coding	BRCA2	NM_000059.4	c.1399A>T	p.Lys467Ter	Pathogenic	Familial_cancer_of_breast|Breast-ovarian_cancer\x2c_familial_2|Hereditary_cancer-predisposing_syndrome|not_provided|Breast_cancer	RCV000043799.2|RCV000077256.5|RCV000131059.3|RCV000221316.1|RCV000240776.1	rs80358427	.	.	.	8.29e-06	4.13e-06
13	32338097	32338100	AGTG	-	frameshift_variant	coding	BRCA2	NM_000059.4	c.3744_3747del	p.Ser1248ArgfsTer10	Pathogenic	Breast-ovarian_cancer\x2c_familial_2|Hereditary_breast_and_ovarian_cancer_syndrome|Hereditary_cancer-predisposing_syndrome	RCV000031437.6|RCV000044254.4|RCV000131096.3	rs80359403	.	.	.	.	4.14e-06
13	32340907	32340907	G	-	frameshift_variant	coding	BRCA2	NM_000059.4	c.6553del	p.Ala2185LeufsTer6	Pathogenic	Familial_cancer_of_breast|Breast-ovarian_cancer\x2c_familial_2|Breast_cancer	RCV000044983.2|RCV000113609.3|RCV000240710.1	rs80359603	.	.	.	.	.
14	75046868	75046868	T	-	frameshift_variant	coding	MLH3	NM_001040108.2	c.2788del	p.Thr930GlnfsTer35	Pathogenic	.	.	.	.	.	.	.	4.06e-06
15	90754809	90754809	A	C	splice_acceptor_variant	coding	BLM	NM_000057.4	c.960-2A>C	-	Likely_pathogenic	.	.	.	.	.	.	.	4.08e-06
15	90790700	90790700	C	T	stop_gained	coding	BLM	NM_000057.4	c.2875C>T	p.Arg959Ter	Pathogenic	Bloom_syndrome	RCV000469284.1	rs762354041	COSM4057910	1(stomach)	.	8.24e-06	4.06e-06
16	13926630	13926630	G	C	missense_variant	coding	ERCC4	NM_005236.3	c.458G>C	p.Arg153Pro	Pathogenic	XFE_progeroid_syndrome	RCV000018049.28	rs121913050	.	.	.	8.24e-06	4.06e-06
17	43049188	43049188	A	G	missense_variant	coding	BRCA1	NM_007294.4	c.5339T>C	p.Leu1780Pro	Pathogenic/Likely_pathogenic	Breast-ovarian_cancer\x2c_familial_1\x2cHereditary_breast_and_ovarian_cancer_syndrome|Breast-ovarian_cancer\x2c_familial_1|Hereditary_cancer-predisposing_syndrome|not_specified	RCV000083070.2\x2cRCV000048948.3|RCV000112624.1|RCV000132201.3|RCV000236823.1	rs80357474	.	.	.	.	4.06e-06
17	43091903	43091903	-	T	frameshift_variant	coding	BRCA1	NM_007294.4	c.3627dup	p.Glu1210ArgfsTer9	Pathogenic	Breast-ovarian_cancer\x2c_familial_1|Hereditary_breast_and_ovarian_cancer_syndrome|Hereditary_cancer-predisposing_syndrome|not_provided	RCV000031115.7|RCV000048263.4|RCV000130022.3|RCV000301326.1	rs80357729	.	.	.	8.26e-06	8.13e-06
17	43104173	43104173	G	T	stop_gained	coding	BRCA1	NM_007294.4	c.390C>A	p.Tyr130Ter	Pathogenic	Breast-ovarian_cancer\x2c_familial_1\x2cHereditary_breast_and_ovarian_cancer_syndrome|Breast-ovarian_cancer\x2c_familial_1|Hereditary_cancer-predisposing_syndrome	RCV000241078.2\x2cRCV000048376.3|RCV000112439.3|RCV000131881.2	rs80356888	.	.	.	8.24e-06	4.06e-06
17	43115788	43115788	G	C	intron_variant	noncoding	BRCA1	NM_007294.4	c.81-9C>G	-	Pathogenic	Hereditary_breast_and_ovarian_cancer_syndrome|Breast-ovarian_cancer\x2c_familial_1	RCV000049152.3|RCV000111718.1	rs80358127	.	.	.	.	4.11e-06
17	61780839	61780839	C	T	splice_donor_variant	coding	BRIP1	NM_032043.3	c.1794+1G>A	-	Likely_pathogenic	.	.	rs766516963	.	.	.	8.24e-06	8.12e-06
19	12810323	12810323	C	T	missense_variant	coding	RNASEH2A	NM_006397.3	c.556C>T	p.Arg186Trp	Likely_pathogenic	Aicardi_Goutieres_syndrome_4	RCV000056305.5	rs77103971	.	.	.	.	4.06e-06
19	45421315	45421315	C	A	stop_gained	coding	ERCC1	NM_001983.4	c.184G>T	p.Glu62Ter	Likely_pathogenic	.	.	rs150584960	.	.	.	8.24e-06	.
22	28695126	28695126	C	T	splice_donor_variant	coding	CHEK2	NM_007194.4	c.1375+1G>A	-	Likely_pathogenic	.	.	rs759706360	.	.	.	8.44e-06	4.07e-06
East Asian (Other East Asian)
1	45333138	45333138	G	A	stop_gained	coding	MUTYH	NM_001048174.2	c.337C>T	p.Gln113Ter	Pathogenic	Hereditary_cancer-predisposing_syndrome	RCV000219018.1	.	.	.	.	.	4.06e-06
2	214781334	214781335	AT	-	frameshift_variant	coding	BARD1	NM_000465.4	c.539_540del	p.Tyr180Ter	Pathogenic	Hereditary_cancer-predisposing_syndrome|Familial_cancer_of_breast	RCV000166193.1|RCV000464643.1	rs779427628	.	.	.	8.25e-06	4.07e-06
2	47403372	47403372	C	T	stop_gained	coding	MSH2	NM_000251.3	c.181C>T	p.Gln61Ter	Pathogenic	Lynch_syndrome\x2cLynch_syndrome|not_provided|Hereditary_cancer-predisposing_syndrome	RCV000465589.1\x2cRCV000076295.2|RCV000202086.1|RCV000219541.1	rs63750951	.	.	.	.	4.38e-06
2	47403373	47403373	A	-	frameshift_variant	coding	MSH2	NM_000251.3	c.182del	p.Gln61ArgfsTer3	Pathogenic	.	.	.	.	.	.	.	4.38e-06
2	47410215	47410215	T	G	missense_variant	coding	MSH2	NM_000251.3	c.488T>G	p.Val163Gly	Pathogenic	Lynch_syndrome\x2cHereditary_cancer-predisposing_syndrome\x2cLynch_syndrome	RCV000076610.2\x2cRCV000221949.1\x2cRCV000076611.2	rs63750214	.	.	.	8.24e-06	4.06e-06
2	47801101	47801102	TT	-	frameshift_variant	coding	MSH6	NM_000179.3	c.3119_3120del	p.Phe1040Ter	Pathogenic	Lynch_syndrome	RCV000074804.2	rs267608042	.	.	.	.	4.1e-06
2	47806282	47806282	G	A	missense_variant	coding	MSH6	NM_000179.3	c.3725G>A	p.Arg1242His	Pathogenic/Likely_pathogenic	Hereditary_cancer-predisposing_syndrome|Lynch_syndrome\x2cLynch_syndrome|Hereditary_cancer-predisposing_syndrome	RCV000129081.3|RCV000230170.1\x2cRCV000074919.2|RCV000130075.2	rs63750119	COSM5025149	1(large_intestine)	.	8.25e-06	4.07e-06
3	14178568	14178568	T	A	start_lost	coding	XPC	NM_004628.5	c.1A>T	p.Met1?	Likely_pathogenic	.	.	.	.	.	.	.	4.09e-06
5	132589653	132589654	CT	-	frameshift_variant	coding	RAD50	NM_005732.4	c.1270_1271del	p.Leu424GlufsTer7	Pathogenic	Hereditary_cancer-predisposing_syndrome	RCV000167173.4	rs786203738	.	.	.	1.72e-05	4.23e-06
5	132603998	132603998	C	T	stop_gained	coding	RAD50	NM_005732.4	c.2476C>T	p.Gln826Ter	Pathogenic	.	.	.	.	.	.	.	4.07e-06
5	132608680	132608680	-	T	frameshift_variant	coding	RAD50	NM_005732.4	c.2786dup	p.Leu929PhefsTer15	Pathogenic	.	.	.	.	.	.	.	4.41e-06
5	80761544	80761544	A	G	splice_acceptor_variant	coding	MSH3	NM_002439.5	c.1764-2A>G	-	Likely_pathogenic	.	.	rs773032453	.	.	.	8.24e-06	.
8	89947853	89947856	CTTC	-	frameshift_variant	coding	NBN	NM_002485.5	c.1882_1885del	p.Glu628ThrfsTer28	Pathogenic	.	.	.	.	.	.	.	4.36e-06
9	95149922	95149922	C	A	splice_donor_variant	coding	FANCC	NM_000136.3	c.686+1G>T	-	Likely_pathogenic	Fanconi_anemia\x2c_complementation_group_C	RCV000409465.1	.	.	.	.	.	4.58e-06
9	97684947	97684948	TC	-	frameshift_variant	coding	XPA	NM_000380.4	c.648_649del	p.Lys217GlufsTer3	Likely_pathogenic	Xeroderma_pigmentosum\x2c_type_1	RCV000415712.1	.	.	.	.	.	4.07e-06
10	49524133	49524133	C	A	stop_gained	coding	ERCC6	NM_000124.4	c.1297G>T	p.Glu433Ter	Pathogenic	.	.	rs781332656	.	.	.	1.65e-05	8.21e-06
11	108271407	108271407	G	T	splice_donor_variant	coding	ATM	NM_000051.4	c.3077+1G>T	-	Likely_pathogenic	Ataxia-telangiectasia_syndrome	RCV000206879.2	rs192810283	.	.	0.0002	8.3e-06	4.08e-06
11	108335916	108335917	AA	-	frameshift_variant	coding	ATM	NM_000051.4	c.8224_8225del	p.Asn2742HisfsTer4	Pathogenic	.	.	.	.	.	.	.	4.07e-06
11	108343237	108343237	C	T	stop_gained	coding	ATM	NM_000051.4	c.8284C>T	p.Gln2762Ter	Pathogenic	.	.	rs751574257	COSM3733461;COSM3733462	1(haematopoietic_and_lymphoid_tissue)	.	8.24e-06	4.06e-06
11	108345758	108345759	TC	-	frameshift_variant	coding	ATM	NM_000051.4	c.8435_8436del	p.Ser2812PhefsTer2	Pathogenic	.	.	rs767533596	.	.	.	8.28e-06	1.22e-05
11	108353765	108353765	G	-	splice_acceptor_variant	coding	ATM	NM_000051.4	c.8672del	-	Pathogenic	.	.	rs779170307	.	.	.	8.24e-06	4.06e-06
11	94479673	94479673	C	T	splice_donor_variant	coding	MRE11	NM_005591.4	c.402+1G>A	-	Likely_pathogenic	.	.	.	.	.	.	.	4.08e-06
12	132681201	132681201	C	-	frameshift_variant	coding	POLE	NM_006231.4	c.141del	p.Phe48LeufsTer6	Likely_pathogenic	.	.	rs761329565	.	.	.	8.24e-06	4.06e-06
13	32316420	32316421	AG	-	splice_acceptor_variant	coding	BRCA2	NM_000059.4	c.-39-1_-39del	-	Likely_pathogenic	.	.	rs758732038	.	.	.	8.59e-06	8.2e-06
13	32336694	32336694	C	G	stop_gained	coding	BRCA2	NM_000059.4	c.2339C>G	p.Ser780Ter	Pathogenic	Hereditary_cancer-predisposing_syndrome|not_specified|Breast-ovarian_cancer\x2c_familial_2	RCV000129415.3|RCV000238974.1|RCV000241405.2	rs587781471	.	.	.	.	4.07e-06
13	32336795	32336795	C	-	frameshift_variant	coding	BRCA2	NM_000059.4	c.2442del	p.Met815TrpfsTer10	Pathogenic	Hereditary_breast_and_ovarian_cancer_syndrome|Breast-ovarian_cancer\x2c_familial_2	RCV000043995.3|RCV000241109.1	rs760027075	.	.	.	8.31e-06	4.17e-06
13	32337522	32337525	AAAA	-	frameshift_variant	coding	BRCA2	NM_000059.4	c.3167_3170del	p.Gln1056ArgfsTer3	Pathogenic	Familial_cancer_of_breast|Breast-ovarian_cancer\x2c_familial_2	RCV000044135.3|RCV000113141.3	rs80359372	.	.	.	8.33e-06	4.13e-06
13	32340035	32340035	-	A	stop_gained,frameshift_variant	coding	BRCA2	NM_000059.4	c.5681dup	p.Tyr1894Ter	Pathogenic	Breast-ovarian_cancer\x2c_familial_2|Hereditary_breast_and_ovarian_cancer_syndrome|Hereditary_cancer-predisposing_syndrome	RCV000031569.6|RCV000044718.4|RCV000129296.3	rs80359527	.	.	.	.	4.08e-06
13	32340839	32340840	AA	-	frameshift_variant	coding	BRCA2	NM_000059.4	c.6485_6486del	p.Lys2162ThrfsTer13	Pathogenic	Breast-ovarian_cancer\x2c_familial_2	RCV000256491.2	.	.	.	.	.	4.39e-06
13	32355230	32355233	AAAC	-	frameshift_variant	coding	BRCA2	NM_000059.4	c.7379_7382del	p.Asn2460ThrfsTer6	Pathogenic	Breast-ovarian_cancer\x2c_familial_2|Familial_cancer_of_breast	RCV000031673.6|RCV000045194.2	rs80359648	.	.	.	.	4.07e-06
13	32357820	32357820	-	A	frameshift_variant	coding	BRCA2	NM_000059.4	c.7697dup	p.Asp2566GlufsTer5	Pathogenic	Familial_cancer_of_breast|Breast-ovarian_cancer\x2c_familial_2	RCV000045291.2|RCV000241396.1	rs773891693	.	.	.	8.24e-06	.
15	90769223	90769226	GTCA	-	frameshift_variant	coding	BLM	NM_000057.4	c.2403_2406del	p.Gln802GlyfsTer12	Pathogenic	.	.	.	.	.	.	.	4.06e-06
15	90804172	90804172	C	-	frameshift_variant	coding	BLM	NM_000057.4	c.3564del	p.Phe1189LeufsTer10	Pathogenic	.	.	.	.	.	.	.	4.07e-06
16	2040196	2040196	C	T	stop_gained	coding	NTHL1	NM_002528.7	c.728G>A	p.Trp243Ter	Pathogenic	.	.	.	.	.	.	.	4.06e-06
16	23622997	23622997	C	A	stop_gained	coding	PALB2	NM_024675.4	c.2968G>T	p.Glu990Ter	Pathogenic	Hereditary_cancer-predisposing_syndrome	RCV000219424.2	.	.	.	.	.	8.12e-06
16	23624095	23624095	C	G	splice_acceptor_variant	coding	PALB2	NM_024675.4	c.2749-1G>C	-	Likely_pathogenic	.	.	.	.	.	.	.	.
16	23626377	23626377	G	-	frameshift_variant	coding	PALB2	NM_024675.4	c.2607del	p.Val870Ter	Pathogenic/Likely_pathogenic	.	.	rs767633741	.	.	.	8.24e-06	.
16	89740009	89740009	-	A	frameshift_variant	coding	FANCA	NM_000135.4	c.3918dup	p.Gln1307SerfsTer6	Pathogenic	.	.	.	.	.	.	.	8.12e-06
16	89752211	89752214	TAAC	-	frameshift_variant	coding	FANCA	NM_000135.4	c.2990_2993del	p.Ser997MetfsTer28	Likely_pathogenic	.	.	.	.	.	.	.	4.06e-06
17	43051062	43051062	C	T	splice_donor_variant	coding	BRCA1	NM_007294.4	c.5332+1G>A	-	Pathogenic	Breast-ovarian_cancer\x2c_familial_1\x2cFamilial_cancer_of_breast|not_provided\x2cHereditary_breast_and_ovarian_cancer_syndrome|Breast-ovarian_cancer\x2c_familial_1	RCV000258497.1\x2cRCV000048934.2|RCV000235344.1\x2cRCV000048933.3|RCV000112615.3	rs80358041	.	.	.	8.29e-06	4.06e-06
17	43063923	43063924	CA	-	frameshift_variant	coding	BRCA1	NM_007294.4	c.5102_5103del	p.Leu1701GlnfsTer14	Pathogenic	Hereditary_breast_and_ovarian_cancer_syndrome|Breast-ovarian_cancer\x2c_familial_1	RCV000048795.3|RCV000077596.5	rs80357608	.	.	.	8.3e-06	.
17	43091870	43091870	C	A	stop_gained	coding	BRCA1	NM_007294.4	c.3661G>T	p.Glu1221Ter	Pathogenic	Hereditary_breast_and_ovarian_cancer_syndrome|Breast-ovarian_cancer\x2c_familial_1|Breast_cancer|Hereditary_cancer-predisposing_syndrome|not_provided	RCV000048276.5|RCV000112149.3|RCV000148388.1|RCV000162864.1|RCV000258961.1	rs80357310	.	.	.	8.24e-06	4.06e-06
17	43092089	43092089	C	-	frameshift_variant	coding	BRCA1	NM_007294.4	c.3442del	p.Glu1148ArgfsTer7	Pathogenic	Breast-ovarian_cancer\x2c_familial_1|Familial_cancer_of_breast|Hereditary_cancer-predisposing_syndrome	RCV000031111.6|RCV000048199.2|RCV000130808.3	rs80357808	.	.	.	.	4.07e-06
17	43092200	43092200	G	A	stop_gained	coding	BRCA1	NM_007294.4	c.3331C>T	p.Gln1111Ter	Pathogenic	Hereditary_breast_and_ovarian_cancer_syndrome|Breast-ovarian_cancer\x2c_familial_1	RCV000048150.5|RCV000112070.3	rs80357089	.	.	.	.	4.08e-06
17	43092448	43092448	C	-	frameshift_variant	coding	BRCA1	NM_007294.4	c.3083del	p.Arg1028LeufsTer20	Pathogenic	.	.	.	.	.	.	.	4.07e-06
17	43092732	43092735	ACCA	-	frameshift_variant	coding	BRCA1	NM_007294.4	c.2796_2799del	p.Gly933ArgfsTer66	Pathogenic	Familial_cancer_of_breast|Breast-ovarian_cancer\x2c_familial_1	RCV000047970.2|RCV000111940.2	rs80357840	.	.	.	.	4.07e-06
17	43093256	43093256	G	A	stop_gained	coding	BRCA1	NM_007294.4	c.2275C>T	p.Gln759Ter	Pathogenic	Familial_cancer_of_breast|Breast-ovarian_cancer\x2c_familial_1	RCV000047780.2|RCV000111814.2	rs80356999	.	.	.	.	4.07e-06
17	43124063	43124063	G	A	stop_gained	coding	BRCA1	NM_007294.4	c.34C>T	p.Gln12Ter	Pathogenic	Familial_cancer_of_breast|Breast-ovarian_cancer\x2c_familial_1|not_provided	RCV000048217.2|RCV000111614.3|RCV000412855.1	rs80357134	.	.	0.0002	8.27e-06	.
17	58692789	58692789	G	A	splice_donor_variant	coding	RAD51C	NM_058216.3	c.145+1G>A	-	Likely_pathogenic	Hereditary_cancer-predisposing_syndrome	RCV000216860.1	rs757128712	COSM981983;COSM981982	1(endometrium)	.	8.26e-06	4.06e-06
17	61793727	61793727	C	T	stop_gained,splice_region_variant	coding	BRIP1	NM_032043.3	c.1343G>A	p.Trp448Ter	Pathogenic/Likely_pathogenic	Familial_cancer_of_breast|Fanconi_anemia\x2c_complementation_group_J|Hereditary_cancer-predisposing_syndrome	RCV000198848.3|RCV000198848.3|RCV000449028.1	rs775171520	.	.	.	3.7e-05	2.48e-05
17	61801454	61801454	A	C	stop_gained	coding	BRIP1	NM_032043.3	c.939T>G	p.Tyr313Ter	Pathogenic	.	.	.	.	.	.	.	4.07e-06
17	7674252	7674252	C	T	missense_variant	coding	TP53	NM_000546.6	c.711G>A	p.Met237Ile	Pathogenic/Likely_pathogenic	Hereditary_cancer-predisposing_syndrome|Neoplasm_of_brain|Ovarian_Serous_Cystadenocarcinoma|Malignant_neoplasm_of_body_of_uterus|Brainstem_glioma|Squamous_cell_carcinoma_of_the_head_and_neck|Oesophageal_carcinoma|Adenocarcinoma_of_lung|Adenocarcinoma_of_stomach|Neoplasm_of_breast|Pancreatic_adenocarcinoma|Colorectal_Neoplasms|Squamous_cell_carcinoma_of_lung|Li-Fraumeni_syndrome	RCV000132084.3|RCV000417987.1|RCV000420354.1|RCV000422710.1|RCV000423376.1|RCV000428641.1|RCV000431054.1|RCV000432346.1|RCV000433401.1|RCV000435205.1|RCV000440576.1|RCV000441079.1|RCV000441725.1|RCV000464261.1	rs587782664	COSM1640835;COSM99646;COSM10834;COSM3378348;COSM99648;COSM99647	15(ovary);15(breast);6(stomach);12(haematopoietic_and_lymphoid_tissue);2(urinary_tract);3(pancreas);1(liver);7(oesophagus);9(lung);1(thyroid);9(upper_aerodigestive_tract);1(testis);5(large_intestine);11(central_nervous_system);2(endometrium)	.	8.24e-06	4.06e-06
17	7674870	7674870	C	A	stop_gained	coding	TP53	NM_000546.6	c.661G>T	p.Glu221Ter	Pathogenic	.	.	.	COSM126983;COSM3937611;COSM126984;COSM44817;COSM1646845;COSM126982	1(ovary);1(breast);1(stomach);1(urinary_tract);4(liver);3(oesophagus);1(lung);4(upper_aerodigestive_tract);1(large_intestine);2(central_nervous_system)	.	.	4.06e-06
19	45421300	45421300	G	A	stop_gained	coding	ERCC1	NM_001983.4	c.199C>T	p.Gln67Ter	Likely_pathogenic	.	.	.	.	.	.	.	4.06e-06
22	28694034	28694034	G	A	stop_gained,splice_region_variant	coding	CHEK2	NM_007194.4	c.1459C>T	p.Gln487Ter	Pathogenic	Hereditary_cancer-predisposing_syndrome	RCV000214536.1	.	.	.	.	.	1.75e-05
22	28719456	28719456	C	-	frameshift_variant	coding	CHEK2	NM_007194.4	c.622del	p.Asp208IlefsTer9	Pathogenic	.	.	rs773955899	.	.	.	3.33e-05	4.48e-06
Southern Asian
1	45331220	45331220	C	A	stop_gained	coding	MUTYH	NM_001048174.2	c.1354G>T	p.Glu452Ter	Pathogenic	MYH-associated_polyposis|Hereditary_cancer-predisposing_syndrome|not_provided	RCV000005618.6|RCV000222872.1|RCV000235388.2	rs121908381	.	.	0.0018	9.89e-05	6.09e-05
1	45331479	45331479	G	A	stop_gained	coding	MUTYH	NM_001048174.2	c.1180C>T	p.Gln394Ter	Pathogenic	.	.	.	.	.	.	.	4.06e-06
1	45331503	45331503	G	A	stop_gained	coding	MUTYH	NM_001048174.2	c.1156C>T	p.Gln386Ter	Pathogenic	MYH-associated_polyposis	RCV000465367.1	rs766420907	.	.	.	6.64e-05	5.29e-05
1	45331660	45331660	C	T	splice_donor_variant	coding	MUTYH	NM_001048174.2	c.1102+1G>A	-	Likely_pathogenic	Hereditary_cancer-predisposing_syndrome	RCV000129098.3	rs587781337	.	.	.	8.36e-06	4.07e-06
1	45331712	45331712	G	A	stop_gained	coding	MUTYH	NM_001048174.2	c.1051C>T	p.Gln351Ter	Pathogenic	.	.	rs745910470	.	.	.	8.35e-06	4.07e-06
1	45332240	45332240	C	-	frameshift_variant	coding	MUTYH	NM_001048174.2	c.775del	p.Ala259ProfsTer32	Pathogenic/Likely_pathogenic	.	.	rs761468459	.	.	.	8.32e-06	4.07e-06
1	45332401	45332401	G	A	stop_gained	coding	MUTYH	NM_001048174.2	c.694C>T	p.Gln232Ter	Pathogenic/Likely_pathogenic	not_provided	RCV000235928.1	rs773087549	.	.	.	8.38e-06	8.15e-06
2	214745066	214745066	C	T	splice_donor_variant	coding	BARD1	NM_000465.4	c.1903+1G>A	-	Likely_pathogenic	.	.	.	.	.	.	.	4.07e-06
2	214745084	214745084	C	T	stop_gained	coding	BARD1	NM_000465.4	c.1886G>A	p.Trp629Ter	Pathogenic	.	.	rs747446711	COSM1669731;COSM1669730	1(lung)	.	8.32e-06	4.07e-06
2	214769298	214769298	A	-	frameshift_variant	coding	BARD1	NM_000465.4	c.1329del	p.Val444LeufsTer31	Pathogenic	.	.	rs767587416	.	.	.	8.28e-06	4.06e-06
2	219078208	219078208	T	C	splice_acceptor_variant	coding	NHEJ1	NM_024782.3	c.589-2A>G	-	Likely_pathogenic	.	.	rs753495484	.	.	.	8.24e-06	4.06e-06
2	3550413	3550413	G	A	stop_gained	coding	RNASEH1	NM_002936.6	c.469C>T	p.Arg157Ter	Pathogenic	Progressive_external_ophthalmoplegia_with_mitochondrial_DNA_deletions\x2c_autosomal_recessive_2	RCV000412498.1	rs373442996	.	.	.	8.26e-06	8.12e-06
2	47798701	47798701	C	T	stop_gained	coding	MSH6	NM_000179.3	c.718C>T	p.Arg240Ter	Pathogenic	Lynch_syndrome|Hereditary_cancer-predisposing_syndrome	RCV000075028.2|RCV000220361.1	rs63750019	COSM227218	1(skin)	.	8.28e-06	4.07e-06
2	47799466	47799466	C	T	stop_gained	coding	MSH6	NM_000179.3	c.1483C>T	p.Arg495Ter	Pathogenic	Lynch_syndrome|Hereditary_cancer-predisposing_syndrome|not_provided	RCV000074659.2|RCV000131420.3|RCV000202276.3	rs587779212	COSM29732	1(haematopoietic_and_lymphoid_tissue)	.	.	4.07e-06
2	47800747	47800747	C	T	stop_gained	coding	MSH6	NM_000179.3	c.2764C>T	p.Arg922Ter	Pathogenic	Lynch_syndrome	RCV000074779.2	rs587779246	COSM1645446	1(breast);1(large_intestine)	.	8.28e-06	4.07e-06
2	47803553	47803554	TT	-	frameshift_variant	coding	MSH6	NM_000179.3	c.3311_3312del	p.Phe1104TrpfsTer3	Pathogenic	Hereditary_nonpolyposis_colorectal_cancer_type_5|Lynch_syndrome|not_provided|Hereditary_cancer-predisposing_syndrome|Turcot_syndrome	RCV000009490.6|RCV000074837.2|RCV000202034.1|RCV000223509.1|RCV000274467.1	rs267608092	.	.	.	.	4.06e-06
2	47804948	47804948	C	G	stop_gained	coding	MSH6	NM_000179.3	c.3477C>G	p.Tyr1159Ter	Pathogenic	not_provided|Lynch_syndrome\x2cLynch_syndrome\x2cLynch_syndrome|Hereditary_cancer-predisposing_syndrome	RCV000078315.5|RCV000456684.1\x2cRCV000228304.1\x2cRCV000074863.2|RCV000165527.1	.	.	.	.	.	4.06e-06
2	47804983	47804993	ATAGAGTGTTT	-	frameshift_variant	coding	MSH6	NM_000179.3	c.3513_3523del	p.Arg1172Ter	Pathogenic	.	.	.	.	.	.	.	4.06e-06
2	47805692	47805692	-	T	frameshift_variant	coding	MSH6	NM_000179.3	c.3633dup	p.Val1212CysfsTer3	Pathogenic	Turcot_syndrome	RCV000009497.6	rs762783821	.	.	.	8.24e-06	4.06e-06
2	47806641	47806641	C	T	stop_gained	coding	MSH6	NM_000179.3	c.3991C>T	p.Arg1331Ter	Pathogenic	Lynch_syndrome|Hereditary_cancer-predisposing_syndrome|not_provided|Hereditary_nonpolyposis_colorectal_cancer_type_5	RCV000035325.5|RCV000131743.5|RCV000202305.2|RCV000410467.1	rs267608094	COSM293555	1(large_intestine)	.	.	4.16e-06
2	58160108	58160108	C	T	splice_region_variant,synonymous_variant	coding	FANCL	NM_018062.4	c.1092G>A	p.Lys364=	Pathogenic	.	.	rs577063114	.	.	.	2.48e-05	2.04e-05
3	14148846	14148846	C	A	stop_gained	coding	XPC	NM_004628.5	c.2218G>T	p.Glu740Ter	Pathogenic/Likely_pathogenic	.	.	.	.	.	.	.	4.06e-06
3	14158206	14158206	G	C	stop_gained	coding	XPC	NM_004628.5	c.1677C>G	p.Tyr559Ter	Pathogenic	Xeroderma_pigmentosum\x2c_group_C	RCV000170432.1	rs767569346	.	.	.	8.28e-06	4.06e-06
3	37028858	37028858	C	-	frameshift_variant	coding	MLH1	NM_000249.4	c.1489del	p.Arg497GlyfsTer11	Pathogenic	Lynch_syndrome	RCV000075226.2	rs763560251	COSM1422596	2(NS);1(large_intestine)	.	8.24e-06	4.06e-06
3	37040184	37040184	A	G	splice_acceptor_variant	coding	MLH1	NM_000249.4	c.1559-2A>G	-	Pathogenic	Lynch_syndrome\x2cLynch_syndrome|Lynch_syndrome_II\x2cLynch_syndrome	RCV000075256.2\x2cRCV000075257.2|RCV000410283.1\x2cRCV000075258.2	rs267607836	.	.	.	.	4.07e-06
3	37048532	37048532	G	T	stop_gained	coding	MLH1	NM_000249.4	c.1912G>T	p.Gly638Ter	Pathogenic	not_provided\x2cLynch_syndrome	RCV000114854.1\x2cRCV000197271.1	rs63750549	.	.	.	.	4.06e-06
5	132588827	132588827	A	-	frameshift_variant	coding	RAD50	NM_005732.4	c.1194del	p.Lys398AsnfsTer3	Pathogenic	.	.	rs780230934	.	.	.	8.32e-06	4.07e-06
5	132589734	132589737	TAAG	-	frameshift_variant	coding	RAD50	NM_005732.4	c.1353_1356del	p.Ser451ArgfsTer6	Pathogenic	.	.	.	.	.	.	.	1.22e-05
5	132594868	132594868	G	A	splice_acceptor_variant	coding	RAD50	NM_005732.4	c.1794-1G>A	-	Likely_pathogenic	Hereditary_cancer-predisposing_syndrome	RCV000129946.3	rs587781742	.	.	.	1.66e-05	4.08e-06
5	132609286	132609289	AAAG	-	frameshift_variant	coding	RAD50	NM_005732.4	c.2929_2932del	p.Glu977LeufsTer6	Pathogenic	Hereditary_cancer-predisposing_syndrome	RCV000115950.2	rs774194431	.	.	.	0.0001	6.56e-05
5	132609294	132609295	TG	-	frameshift_variant	coding	RAD50	NM_005732.4	c.2934_2935del	p.Glu979ThrfsTer2	Pathogenic/Likely_pathogenic	.	.	rs768522804	.	.	.	1.68e-05	8.18e-06
5	132637202	132637202	T	C	splice_donor_variant	coding	RAD50	NM_005732.4	c.3475+2T>C	-	Likely_pathogenic	Hereditary_cancer-predisposing_syndrome	RCV000223053.1	rs761168506	.	.	.	8.24e-06	4.06e-06
5	83105046	83105046	T	C	missense_variant	coding	XRCC4	NM_003401.5	c.127T>C	p.Trp43Arg	Pathogenic/Likely_pathogenic	Ateleiotic_dwarfism|Short_stature\x2c_microcephaly\x2c_and_endocrine_dysfunction|not_provided	RCV000115044.1|RCV000190521.4|RCV000343573.1	rs587779351	.	.	.	3.31e-05	1.63e-05
6	35466243	35466243	G	A	splice_acceptor_variant	coding	FANCE	NM_021922.3	c.1510-1G>A	-	Pathogenic	.	.	rs772678337	.	.	.	1.65e-05	8.13e-06
7	5999270	5999270	A	-	frameshift_variant	coding	PMS2	NM_000535.7	c.543del	p.Tyr181Ter	Pathogenic	Lynch_syndrome	RCV000076876.2	rs63751029	.	.	.	.	4.06e-06
7	6002470	6002470	G	A	stop_gained	coding	PMS2	NM_000535.7	c.520C>T	p.Gln174Ter	Pathogenic	.	.	.	.	.	.	.	4.1e-06
7	6005990	6005990	G	T	stop_gained	coding	PMS2	NM_000535.7	c.65C>A	p.Ser22Ter	Pathogenic	.	.	rs767028531	.	.	.	8.68e-06	4.16e-06
7	6009018	6009018	A	C	start_lost	coding	PMS2	NM_000535.7	c.2T>G	p.Met1?	Pathogenic	Hereditary_cancer-predisposing_syndrome|Lynch_syndrome\x2cnot_provided|Lynch_syndrome\x2cHereditary_cancer-predisposing_syndrome|not_provided|Lynch_syndrome	RCV000219633.1|RCV000458145.1\x2cRCV000115692.3|RCV000461697.1\x2cRCV000160895.3|RCV000212834.1|RCV000229181.2	.	.	.	.	.	4.08e-06
8	89935614	89935614	T	C	splice_acceptor_variant	coding	NBN	NM_002485.5	c.2235-2A>G	-	Likely_pathogenic	.	.	rs767094704	.	.	.	8.27e-06	4.08e-06
8	89955524	89955524	-	T	frameshift_variant	coding	NBN	NM_002485.5	c.1155dup	p.Val386SerfsTer27	Pathogenic	.	.	rs772612131	.	.	.	8.49e-06	4.08e-06
8	89958725	89958725	C	T	stop_gained,splice_region_variant	coding	NBN	NM_002485.5	c.1124G>A	p.Trp375Ter	Pathogenic	.	.	.	.	.	.	.	4.06e-06
8	89958760	89958760	G	T	stop_gained	coding	NBN	NM_002485.5	c.1089C>A	p.Tyr363Ter	Pathogenic	Hereditary_cancer-predisposing_syndrome|Microcephaly\x2c_normal_intelligence_and_immunodeficiency|not_specified\x2cMicrocephaly\x2c_normal_intelligence_and_immunodeficiency	RCV000160770.5|RCV000196191.4|RCV000212742.3\x2cRCV000007362.3	rs121908974	.	.	.	.	4.06e-06
8	89984555	89984555	T	A	stop_gained	coding	NBN	NM_002485.5	c.7A>T	p.Lys3Ter	Pathogenic/Likely_pathogenic	.	.	rs779098734	.	.	.	1.8e-05	1.25e-05
9	95107065	95107065	C	G	splice_donor_variant	coding	FANCC	NM_000136.3	c.1533+1G>C	-	Likely_pathogenic	Fanconi_anemia\x2c_complementation_group_C	RCV000409707.1	rs753885687	.	.	.	1.66e-05	8.13e-06
9	95114639	95114639	G	-	frameshift_variant	coding	FANCC	NM_000136.3	c.1144del	p.Gln382ArgfsTer31	Likely_pathogenic	Fanconi_anemia\x2c_complementation_group_C	RCV000412286.1	.	.	.	.	.	4.06e-06
9	95240727	95240727	A	-	frameshift_variant	coding	FANCC	NM_000136.3	c.267del	p.Leu90Ter	Likely_pathogenic	.	.	rs777918411	.	.	.	8.38e-06	4.08e-06
9	97687088	97687088	T	C	splice_region_variant,intron_variant	coding	XPA	NM_000380.4	c.555+8A>G	-	Pathogenic	.	.	rs756967163	.	.	.	5.82e-05	4.56e-05
9	97687118	97687118	-	T	frameshift_variant	coding	XPA	NM_000380.4	c.532dup	p.Met178AsnfsTer15	Likely_pathogenic	.	.	.	.	.	.	.	4.08e-06
9	97689614	97689617	TACA	-	frameshift_variant	coding	XPA	NM_000380.4	c.306_309del	p.Tyr102Ter	Pathogenic	.	.	rs773683921	.	.	.	8.88e-06	8.17e-06
10	49459235	49459235	C	G	splice_acceptor_variant	coding	ERCC6	NM_000124.4	c.4063-1G>C	-	Likely_pathogenic	.	.	rs766980240	.	.	.	3.32e-05	2.05e-05
11	108229208	108229209	AG	-	frameshift_variant	coding	ATM	NM_000051.4	c.217_218del	p.Glu73MetfsTer26	Pathogenic	.	.	rs762089971	.	.	.	9.28e-06	4.08e-06
11	108235723	108235723	A	-	frameshift_variant	coding	ATM	NM_000051.4	c.387del	p.Asp130IlefsTer23	Pathogenic/Likely_pathogenic	not_provided	RCV000255124.1	rs745642834	.	.	.	8.25e-06	4.06e-06
11	108250753	108250754	TG	-	frameshift_variant	coding	ATM	NM_000051.4	c.1290_1291del	p.Cys430Ter	Pathogenic/Likely_pathogenic	Hereditary_cancer-predisposing_syndrome|not_provided|Ataxia-telangiectasia_syndrome	RCV000129663.3|RCV000236686.1|RCV000410187.1	rs587781598	.	.	.	.	4.08e-06
11	108251970	108251971	TT	-	frameshift_variant	coding	ATM	NM_000051.4	c.1741_1742del	p.Leu581IlefsTer7	Likely_pathogenic	Ataxia-telangiectasia_syndrome	RCV000411456.1	.	.	.	.	.	4.07e-06
11	108256214	108256214	G	A	splice_acceptor_variant	coding	ATM	NM_000051.4	c.2125-1G>A	-	Likely_pathogenic	.	.	.	.	.	.	.	4.09e-06
11	108267170	108267170	G	A	splice_acceptor_variant	coding	ATM	NM_000051.4	c.2467-1G>A	-	Likely_pathogenic	.	.	.	.	.	.	.	4.07e-06
11	108281133	108281134	AA	-	frameshift_variant	coding	ATM	NM_000051.4	c.3542_3543del	p.Lys1181ArgfsTer18	Likely_pathogenic	.	.	rs746598992	.	.	.	8.24e-06	4.06e-06
11	108343348	108343348	T	-	frameshift_variant	coding	ATM	NM_000051.4	c.8397del	p.Gln2800SerfsTer6	Pathogenic	Hereditary_cancer-predisposing_syndrome|not_provided	RCV000130132.2|RCV000255447.1	rs587781837	.	.	.	.	4.07e-06
11	22625315	22625315	G	A	stop_gained	coding	FANCF	NM_022725.4	c.496C>T	p.Gln166Ter	Pathogenic	.	.	.	.	.	.	.	4.07e-06
11	65720085	65720085	T	A	missense_variant	coding	RNASEH2C	NM_032193.4	c.428A>T	p.Lys143Ile	Pathogenic	Aicardi_Goutieres_syndrome_3	RCV000001323.4	rs75146158	.	.	0.0002	8.25e-06	8.13e-06
11	94447399	94447399	C	A	stop_gained	coding	MRE11	NM_005591.4	c.1603G>T	p.Glu535Ter	Pathogenic	.	.	.	.	.	.	.	8.14e-06
11	94459467	94459467	T	-	frameshift_variant	coding	MRE11	NM_005591.4	c.1441del	p.Thr481HisfsTer43	Pathogenic	Hereditary_cancer-predisposing_syndrome	RCV000199221.1	rs747832587	COSM2061314;COSM2061313	3(large_intestine)	.	8.24e-06	4.06e-06
12	132634323	132634323	T	A	missense_variant	coding	POLE	NM_006231.4	c.5867A>T	p.Glu1956Val	Likely_pathogenic	.	.	rs780843358	.	.	.	8.24e-06	4.11e-06
13	102872283	102872283	-	A	frameshift_variant	coding	BIVM-ERCC5	NM_001204425.2	c.4128dup	p.Leu1377ThrfsTer7	Pathogenic	Cerebrooculofacioskeletal_syndrome_3	RCV000191920.3	rs760232640	.	.	.	1.65e-05	3.66e-05
13	102872283	102872283	-	A	frameshift_variant	coding	ERCC5	NM_000123.4	c.2766dup	p.Leu923ThrfsTer7	Pathogenic	Cerebrooculofacioskeletal_syndrome_3	RCV000191920.3	rs760232640	.	.	.	1.65e-05	3.66e-05
13	32325185	32325185	G	A	splice_donor_variant	coding	BRCA2	NM_000059.4	c.425+1G>A	-	Pathogenic/Likely_pathogenic	Hereditary_cancer-predisposing_syndrome|Breast-ovarian_cancer\x2c_familial_2	RCV000131929.2|RCV000258343.1	rs587782590	.	.	.	.	4.12e-06
13	32337431	32337432	AA	-	frameshift_variant	coding	BRCA2	NM_000059.4	c.3076_3077del	p.Lys1026GlufsTer9	Likely_pathogenic	Breast-ovarian_cancer\x2c_familial_2	RCV000409605.1	.	.	.	.	.	4.08e-06
13	32337810	32337810	T	G	stop_gained	coding	BRCA2	NM_000059.4	c.3455T>G	p.Leu1152Ter	Pathogenic	Hereditary_cancer-predisposing_syndrome|Breast-ovarian_cancer\x2c_familial_2\x2cFamilial_cancer_of_breast|Breast-ovarian_cancer\x2c_familial_2	RCV000215781.1|RCV000257866.2\x2cRCV000044201.2|RCV000113180.3	rs80358593	.	.	.	8.25e-06	4.07e-06
13	32338226	32338226	C	T	stop_gained	coding	BRCA2	NM_000059.4	c.3871C>T	p.Gln1291Ter	Pathogenic	Familial_cancer_of_breast|Breast-ovarian_cancer\x2c_familial_2	RCV000044295.2|RCV000113234.5	rs80358631	.	.	.	1.15e-05	5.23e-06
13	32338358	32338358	G	T	stop_gained	coding	BRCA2	NM_000059.4	c.4003G>T	p.Glu1335Ter	Pathogenic	Hereditary_cancer-predisposing_syndrome|Breast-ovarian_cancer\x2c_familial_2|Hereditary_breast_and_ovarian_cancer_syndrome	RCV000220552.1|RCV000241203.2|RCV000257988.1	rs747070579	.	.	.	8.71e-06	4.42e-06
13	32338600	32338600	G	-	frameshift_variant	coding	BRCA2	NM_000059.4	c.4245del	p.Glu1415AspfsTer4	Pathogenic	Hereditary_cancer-predisposing_syndrome|Breast-ovarian_cancer\x2c_familial_2	RCV000219417.1|RCV000241053.1	rs767234936	.	.	.	8.36e-06	4.19e-06
13	32338895	32338895	-	A	frameshift_variant	coding	BRCA2	NM_000059.4	c.4544dup	p.Ile1516AspfsTer13	Pathogenic	.	.	.	.	.	.	.	4.08e-06
13	32338917	32338918	TA	-	frameshift_variant	coding	BRCA2	NM_000059.4	c.4563_4564del	p.Leu1522GlyfsTer6	Pathogenic	Breast-ovarian_cancer\x2c_familial_2	RCV000113322.3	rs778693075	.	.	.	8.31e-06	8.15e-06
13	32339266	32339266	-	A	frameshift_variant	coding	BRCA2	NM_000059.4	c.4914dup	p.Val1639SerfsTer3	Pathogenic	Hereditary_cancer-predisposing_syndrome|Breast-ovarian_cancer\x2c_familial_2	RCV000166820.1|RCV000240990.1	rs786203494	.	.	.	.	4.1e-06
13	32339291	32339291	G	-	frameshift_variant	coding	BRCA2	NM_000059.4	c.4936del	p.Glu1646LysfsTer24	Pathogenic	.	.	rs773286595	.	.	.	8.39e-06	4.19e-06
13	32340433	32340437	AAGAG	-	frameshift_variant	coding	BRCA2	NM_000059.4	c.6082_6086del	p.Glu2028LysfsTer19	Pathogenic	Familial_cancer_of_breast|Breast-ovarian_cancer\x2c_familial_2|Hereditary_cancer-predisposing_syndrome|not_provided	RCV000044839.4|RCV000077368.5|RCV000131112.3|RCV000235143.1	rs80359558	.	.	.	8.28e-06	4.07e-06
13	32340479	32340479	C	T	stop_gained	coding	BRCA2	NM_000059.4	c.6124C>T	p.Gln2042Ter	Pathogenic	Hereditary_breast_and_ovarian_cancer_syndrome|Breast-ovarian_cancer\x2c_familial_2|not_provided	RCV000044850.5|RCV000077369.5|RCV000223048.1	rs80358851	.	.	.	8.28e-06	4.07e-06
13	32340816	32340816	-	TC	frameshift_variant	coding	BRCA2	NM_000059.4	c.6468_6469dup	p.Gln2157LeufsTer12	Pathogenic	.	.	.	.	.	.	.	4.45e-06
13	32340946	32340947	TG	-	frameshift_variant	coding	BRCA2	NM_000059.4	c.6591_6592del	p.Glu2198AsnfsTer4	Pathogenic	Breast-ovarian_cancer\x2c_familial_2|Hereditary_breast_and_ovarian_cancer_syndrome|Hereditary_cancer-predisposing_syndrome|not_provided	RCV000009904.12|RCV000044989.6|RCV000131037.3|RCV000215210.1	rs80359605	.	.	.	.	4.13e-06
13	32344614	32344614	-	AAGAAAAA	frameshift_variant	coding	BRCA2	NM_000059.4	c.6899_6906dup	p.Ser2303LysfsTer5	Pathogenic	Breast-ovarian_cancer\x2c_familial_2	RCV000258332.1	rs765231294	.	.	.	8.51e-06	4.08e-06
13	32355283	32355283	-	T	frameshift_variant	coding	BRCA2	NM_000059.4	c.7433dup	p.Leu2478PhefsTer19	Pathogenic	Breast-ovarian_cancer\x2c_familial_2	RCV000241524.1	rs779007406	.	.	.	8.45e-06	4.07e-06
13	32370548	32370548	C	A	stop_gained	coding	BRCA2	NM_000059.4	c.8478C>A	p.Tyr2826Ter	Pathogenic	Breast-ovarian_cancer\x2c_familial_2\x2cBreast-ovarian_cancer\x2c_familial_2	RCV000240987.1\x2cRCV000257109.2	rs776353983	.	.	.	8.27e-06	4.06e-06
13	32376792	32376792	G	T	splice_donor_variant	coding	BRCA2	NM_000059.4	c.8754+1G>T	-	Pathogenic/Likely_pathogenic	Familial_cancer_of_breast|Breast-ovarian_cancer\x2c_familial_2\x2cBreast-ovarian_cancer\x2c_familial_2|not_provided	RCV000045613.2|RCV000239149.1\x2cRCV000258328.1|RCV000430537.1	.	.	.	.	.	4.07e-06
13	32379431	32379431	C	T	stop_gained	coding	BRCA2	NM_000059.4	c.8869C>T	p.Gln2957Ter	Pathogenic	Breast-ovarian_cancer\x2c_familial_2|Familial_cancer_of_breast	RCV000031773.6|RCV000045645.2	rs276174913	.	.	.	.	4.08e-06
14	45181636	45181636	G	A	splice_acceptor_variant	coding	FANCM	NM_020937.4	c.4318-1G>A	-	Likely_pathogenic	.	.	rs752228025	.	.	.	9.42e-05	7.35e-05
15	30918251	30918251	T	-	frameshift_variant	coding	FAN1	NM_014967.5	c.1899del	p.Cys633TrpfsTer9	Pathogenic	.	.	rs761988851	.	.	.	3.3e-05	3.25e-05
15	89305410	89305410	G	C	splice_donor_variant	coding	FANCI	NM_001113378.2	c.3255+1G>C	-	Likely_pathogenic	.	.	rs779079622	.	.	.	8.25e-06	4.06e-06
15	90747393	90747393	A	C	start_lost	coding	BLM	NM_000057.4	c.1A>C	p.Met1?	Likely_pathogenic	.	.	.	.	.	.	.	4.24e-06
15	90751944	90751952	TAGGTAAAC	-	splice_donor_variant,coding_sequence_variant,intron_variant	coding	BLM	NM_000057.4	c.959+1_959+9del	-	Likely_pathogenic	.	.	rs765061205	.	.	.	1.65e-05	8.14e-06
15	90760237	90760238	TT	-	frameshift_variant	coding	BLM	NM_000057.4	c.1180_1181del	p.Leu394GlyfsTer23	Pathogenic	.	.	rs758132052	.	.	.	8.24e-06	4.06e-06
15	90763064	90763065	AA	-	frameshift_variant	coding	BLM	NM_000057.4	c.1985_1986del	p.Lys662IlefsTer5	Pathogenic	.	.	rs762804291	.	.	.	8.25e-06	4.06e-06
15	90811246	90811246	G	-	frameshift_variant	coding	BLM	NM_000057.4	c.3917del	p.Gly1306AlafsTer100	Likely_pathogenic	.	.	rs764086459	.	.	.	8.24e-06	4.06e-06
16	13937833	13937836	AAGG	-	frameshift_variant	coding	ERCC4	NM_005236.3	c.1882_1885del	p.Glu628LeufsTer6	Pathogenic	.	.	rs772899497	.	.	.	2.48e-05	3.66e-05
16	23629203	23629203	C	A	splice_donor_variant	coding	PALB2	NM_024675.4	c.2586+1G>T	-	Pathogenic	.	.	.	.	.	.	.	4.07e-06
16	23629666	23629666	C	-	frameshift_variant	coding	PALB2	NM_024675.4	c.2488del	p.Glu830SerfsTer21	Pathogenic	Hereditary_cancer-predisposing_syndrome	RCV000217161.1	.	.	.	.	.	4.06e-06
16	23630142	23630142	A	C	stop_gained	coding	PALB2	NM_024675.4	c.2012T>G	p.Leu671Ter	Likely_pathogenic	.	.	rs755263466	.	.	.	1.65e-05	8.12e-06
16	23634903	23634904	GA	-	frameshift_variant	coding	PALB2	NM_024675.4	c.1642_1643del	p.Ser548ThrfsTer29	Likely_pathogenic	.	.	rs763071340	.	.	.	8.25e-06	4.06e-06
16	23634913	23634913	C	A	stop_gained	coding	PALB2	NM_024675.4	c.1633G>T	p.Glu545Ter	Pathogenic	Familial_cancer_of_breast|Hereditary_cancer-predisposing_syndrome|not_provided	RCV000114484.1|RCV000131237.4|RCV000255843.1	rs180177103	.	.	.	8.24e-06	4.06e-06
16	23635536	23635536	A	T	stop_gained	coding	PALB2	NM_024675.4	c.1010T>A	p.Leu337Ter	Pathogenic	.	.	.	.	.	.	.	4.07e-06
16	23638105	23638105	T	A	stop_gained	coding	PALB2	NM_024675.4	c.73A>T	p.Lys25Ter	Pathogenic	.	.	.	.	.	.	.	4.06e-06
16	23641145	23641145	-	A	frameshift_variant	coding	PALB2	NM_024675.4	c.12dup	p.Pro5SerfsTer8	Pathogenic/Likely_pathogenic	not_provided	RCV000235308.1	.	.	.	.	.	4.12e-06
16	3600977	3600977	A	T	splice_donor_variant	coding	SLX4	NM_032444.4	c.1163+2T>A	-	Pathogenic	.	.	rs773642409	.	.	.	1.68e-05	1.23e-05
16	89739215	89739215	A	T	stop_gained	coding	FANCA	NM_000135.4	c.4085T>A	p.Leu1362Ter	Pathogenic	.	.	rs745688750	.	.	.	8.25e-06	8.13e-06
16	89739992	89739992	A	G	splice_donor_variant	coding	FANCA	NM_000135.4	c.3934+2T>C	-	Likely_pathogenic	.	.	rs771775516	.	.	.	8.24e-06	4.06e-06
16	89740044	89740044	A	C	stop_gained	coding	FANCA	NM_000135.4	c.3884T>G	p.Leu1295Ter	Likely_pathogenic	.	.	.	.	.	.	.	4.06e-06
16	89742798	89742798	G	A	splice_donor_variant	coding	FANCA	NM_000135.4	c.3765+2C>T	-	Likely_pathogenic	.	.	rs776827467	.	.	.	8.24e-06	4.06e-06
16	89748721	89748721	G	A	stop_gained	coding	FANCA	NM_000135.4	c.3286C>T	p.Gln1096Ter	Pathogenic	.	.	.	.	.	.	.	.
16	89749728	89749728	-	C	splice_donor_variant	coding	FANCA	NM_000135.4	c.3239+1dup	-	Pathogenic	.	.	rs766989857	.	.	.	2.02e-05	1.23e-05
16	89761961	89761961	G	C	stop_gained	coding	FANCA	NM_000135.4	c.2840C>G	p.Ser947Ter	Pathogenic	.	.	rs745568821	.	.	.	8.24e-06	4.06e-06
16	89765067	89765067	C	T	splice_acceptor_variant	coding	FANCA	NM_000135.4	c.2602-1G>A	-	Pathogenic	.	.	rs747823528	.	.	.	8.27e-06	4.06e-06
16	89771778	89771778	A	G	missense_variant	coding	FANCA	NM_000135.4	c.2051T>C	p.Leu684Pro	Likely_pathogenic	.	.	rs762526878	.	.	.	8.24e-06	8.12e-06
16	89803261	89803261	G	A	stop_gained,splice_region_variant	coding	FANCA	NM_000135.4	c.790C>T	p.Gln264Ter	Pathogenic	.	.	.	.	.	.	.	4.06e-06
16	89811036	89811036	C	-	frameshift_variant	coding	FANCA	NM_000135.4	c.319del	p.Val107PhefsTer31	Pathogenic	.	.	.	COSM5017882	1(soft_tissue)	.	.	4.07e-06
16	89816536	89816536	C	T	splice_donor_variant	coding	FANCA	NM_000135.4	c.79+1G>A	-	Likely_pathogenic	.	.	.	.	.	.	.	1.08e-05
17	35107105	35107105	T	-	frameshift_variant	coding	RAD51D	NM_002878.3	c.363del	p.Ala122GlnfsTer14	Pathogenic/Likely_pathogenic	Hereditary_cancer-predisposing_syndrome|not_provided	RCV000160929.2|RCV000412677.1	rs730881935	.	.	.	8.24e-06	1.63e-05
17	43049161	43049161	G	-	frameshift_variant	coding	BRCA1	NM_007294.4	c.5366del	p.Ala1789ValfsTer4	Pathogenic	Breast-ovarian_cancer\x2c_familial_1	RCV000240994.1	rs760188581	.	.	.	8.25e-06	4.06e-06
17	43067607	43067607	C	T	splice_donor_variant	coding	BRCA1	NM_007294.4	c.5074+1G>A	-	Pathogenic	Breast-ovarian_cancer\x2c_familial_1|Familial_cancer_of_breast\x2cBreast-ovarian_cancer\x2c_familial_1\x2cBreast-ovarian_cancer\x2c_familial_1|Hereditary_breast_and_ovarian_cancer_syndrome|Hereditary_cancer-predisposing_syndrome	RCV000031211.5|RCV000048765.2\x2cRCV000258181.1\x2cRCV000031210.6|RCV000048764.3|RCV000131833.2	rs80358053	.	.	.	.	4.06e-06
17	43074498	43074498	G	T	stop_gained	coding	BRCA1	NM_007294.4	c.4508C>A	p.Ser1503Ter	Pathogenic	Familial_cancer_of_breast|Breast-ovarian_cancer\x2c_familial_1|Hereditary_cancer-predisposing_syndrome	RCV000048583.2|RCV000112351.3|RCV000129157.1	rs80357437	.	.	.	8.26e-06	8.13e-06
17	43074522	43074522	C	T	splice_acceptor_variant	coding	BRCA1	NM_007294.4	c.4485-1G>A	-	Pathogenic/Likely_pathogenic	not_provided|Breast-ovarian_cancer\x2c_familial_1\x2cBreast-ovarian_cancer\x2c_familial_1\x2cFamilial_cancer_of_breast|Breast-ovarian_cancer\x2c_familial_1|not_provided	RCV000236333.1|RCV000258158.1\x2cRCV000258379.1\x2cRCV000048577.2|RCV000112343.2|RCV000235386.1	rs80358189	.	.	.	1.68e-05	1.22e-05
17	43091933	43091933	G	A	stop_gained	coding	BRCA1	NM_007294.4	c.3598C>T	p.Gln1200Ter	Pathogenic	Hereditary_breast_and_ovarian_cancer_syndrome|Breast-ovarian_cancer\x2c_familial_1|Hereditary_cancer-predisposing_syndrome|not_provided	RCV000048245.5|RCV000077552.7|RCV000131819.4|RCV000159977.3	rs62625307	.	.	.	.	4.07e-06
17	43092051	43092054	CTTT	-	frameshift_variant	coding	BRCA1	NM_007294.4	c.3477_3480del	p.Ile1159MetfsTer50	Pathogenic	Hereditary_breast_and_ovarian_cancer_syndrome|Breast-ovarian_cancer\x2c_familial_1|Hereditary_cancer-predisposing_syndrome|not_provided	RCV000048209.3|RCV000077550.5|RCV000215402.1|RCV000235430.2	rs80357781	.	.	.	8.24e-06	4.06e-06
17	43092493	43092494	TC	-	frameshift_variant	coding	BRCA1	NM_007294.4	c.3037_3038del	p.Glu1013AsnfsTer4	Pathogenic	Breast-ovarian_cancer\x2c_familial_1	RCV000031083.5	rs397507208	.	.	.	8.25e-06	4.07e-06
17	43092845	43092846	TT	-	frameshift_variant	coding	BRCA1	NM_007294.4	c.2685_2686del	p.Pro897LysfsTer5	Pathogenic	Familial_cancer_of_breast|Breast-ovarian_cancer\x2c_familial_1	RCV000047931.2|RCV000077525.6	rs80357636	.	.	.	.	4.07e-06
17	43092928	43092928	G	C	stop_gained	coding	BRCA1	NM_007294.4	c.2603C>G	p.Ser868Ter	Pathogenic	Breast-ovarian_cancer\x2c_familial_1|Familial_cancer_of_breast|Hereditary_cancer-predisposing_syndrome|not_provided\x2cFamilial_cancer_of_breast	RCV000031058.6|RCV000047897.4|RCV000162858.2|RCV000235126.2\x2cRCV000047896.2	rs80356925	.	.	.	.	4.07e-06
17	43093122	43093122	A	-	frameshift_variant	coding	BRCA1	NM_007294.4	c.2409del	p.Gln804SerfsTer11	Pathogenic	Breast-ovarian_cancer\x2c_familial_1	RCV000241119.1	rs770460699	.	.	.	8.24e-06	4.08e-06
17	43093125	43093126	CA	-	frameshift_variant	coding	BRCA1	NM_007294.4	c.2405_2406del	p.Val802GlufsTer7	Pathogenic	Familial_cancer_of_breast|Breast-ovarian_cancer\x2c_familial_1|Hereditary_cancer-predisposing_syndrome|Breast_cancer	RCV000047826.3|RCV000111844.3|RCV000162857.1|RCV000412819.1	rs80357999	.	.	.	8.24e-06	4.08e-06
17	43093553	43093554	CT	-	frameshift_variant	coding	BRCA1	NM_007294.4	c.1977_1978del	p.Val660GlnfsTer12	Pathogenic	Breast-ovarian_cancer\x2c_familial_1	RCV000241525.1	rs773413634	.	.	.	8.24e-06	4.07e-06
17	43093569	43093569	-	T	frameshift_variant	coding	BRCA1	NM_007294.4	c.1961dup	p.Tyr655ValfsTer18	Pathogenic	Breast-ovarian_cancer\x2c_familial_1|not_provided|Hereditary_cancer-predisposing_syndrome|Hereditary_breast_and_ovarian_cancer_syndrome	RCV000031018.7|RCV000047661.6|RCV000130225.2|RCV000203641.2	rs80357853	.	.	.	1.65e-05	1.22e-05
17	43093687	43093687	-	AC	frameshift_variant	coding	BRCA1	NM_007294.4	c.1842_1843dup	p.Ser615CysfsTer12	Pathogenic	Breast-ovarian_cancer\x2c_familial_1	RCV000241272.1	rs767595162	.	.	.	8.25e-06	4.07e-06
17	43093691	43093692	TC	-	frameshift_variant	coding	BRCA1	NM_007294.4	c.1839_1840del	p.Lys614ValfsTer10	Pathogenic	Breast-ovarian_cancer\x2c_familial_1	RCV000241426.1	rs752474843	.	.	.	8.25e-06	4.07e-06
17	43093880	43093880	-	A	frameshift_variant	coding	BRCA1	NM_007294.4	c.1650dup	p.Ser551Ter	Pathogenic	Breast-ovarian_cancer\x2c_familial_1	RCV000241455.1	rs753524038	.	.	.	8.26e-06	4.07e-06
17	43094023	43094027	TTTAA	-	frameshift_variant	coding	BRCA1	NM_007294.4	c.1504_1508del	p.Leu502AlafsTer2	Pathogenic	Breast-ovarian_cancer\x2c_familial_1|not_provided|Hereditary_cancer-predisposing_syndrome|Hereditary_breast_and_ovarian_cancer_syndrome	RCV000030998.9|RCV000047499.6|RCV000131841.3|RCV000210987.2	rs80357888	COSM5702555;COSM5702554	1(ovary)	.	1.65e-05	8.14e-06
17	43094341	43094341	T	-	frameshift_variant	coding	BRCA1	NM_007294.4	c.1190del	p.Asp397AlafsTer13	Pathogenic	Breast-ovarian_cancer\x2c_familial_1	RCV000241162.2	rs748714307	.	.	.	8.25e-06	4.07e-06
17	43094635	43094636	AC	-	frameshift_variant	coding	BRCA1	NM_007294.4	c.895_896del	p.Val299ArgfsTer4	Pathogenic	Familial_cancer_of_breast|Breast-ovarian_cancer\x2c_familial_1	RCV000049179.3|RCV000111504.7	rs80357759	.	.	.	8.24e-06	4.06e-06
17	43104217	43104217	C	-	frameshift_variant	coding	BRCA1	NM_007294.4	c.346del	p.Glu116AsnfsTer3	Pathogenic	Breast-ovarian_cancer\x2c_familial_1	RCV000238656.2	rs762635795	.	.	.	8.24e-06	4.06e-06
17	58695190	58695190	G	A	splice_donor_variant	coding	RAD51C	NM_058216.3	c.404+1G>A	-	Likely_pathogenic	.	.	.	.	.	.	8.57e-06	4.15e-06
17	58696858	58696858	G	-	frameshift_variant,splice_region_variant	coding	RAD51C	NM_058216.3	c.571+1del	-	Likely_pathogenic	.	.	.	.	.	.	.	4.06e-06
17	58703244	58703245	AT	-	frameshift_variant	coding	RAD51C	NM_058216.3	c.622_623del	p.Ile208LeufsTer7	Pathogenic	Hereditary_cancer-predisposing_syndrome	RCV000214716.1	rs765883905	.	.	.	8.26e-06	4.07e-06
17	58703325	58703325	C	G	stop_gained	coding	RAD51C	NM_058216.3	c.701C>G	p.Ser234Ter	Pathogenic	Hereditary_cancer-predisposing_syndrome|Fanconi_anemia\x2c_complementation_group_O	RCV000132392.3|RCV000458376.1	rs587782818	.	.	.	7.44e-05	6.51e-05
17	61685874	61685874	G	C	stop_gained	coding	BRIP1	NM_032043.3	c.2867C>G	p.Ser956Ter	Likely_pathogenic	.	.	rs761639530	.	.	.	8.26e-06	4.07e-06
17	61685911	61685911	G	A	stop_gained	coding	BRIP1	NM_032043.3	c.2830C>T	p.Gln944Ter	Likely_pathogenic	Hereditary_cancer-predisposing_syndrome|Familial_cancer_of_breast|Fanconi_anemia\x2c_complementation_group_J|not_specified|Neoplasm_of_ovary|Fanconi_anemia\x2c_complementation_group_J	RCV000116149.5|RCV000199089.4|RCV000199089.4|RCV000212330.2|RCV000409338.1|RCV000411198.1	rs140233356	.	.	.	8.24e-06	4.06e-06
17	61793641	61793645	AAGTT	-	frameshift_variant	coding	BRIP1	NM_032043.3	c.1425_1429del	p.Leu475PhefsTer34	Pathogenic/Likely_pathogenic	.	.	rs768736851	.	.	.	1.1e-05	4.18e-06
17	61799278	61799278	G	A	stop_gained	coding	BRIP1	NM_032043.3	c.1162C>T	p.Gln388Ter	Pathogenic	.	.	.	.	.	.	.	4.08e-06
17	61801461	61801461	T	-	frameshift_variant	coding	BRIP1	NM_032043.3	c.932del	p.Tyr311PhefsTer27	Pathogenic	not_specified	RCV000120410.1	rs587778138	.	.	.	8.26e-06	4.07e-06
17	61857144	61857147	TTGT	-	frameshift_variant	coding	BRIP1	NM_032043.3	c.290_293del	p.Asn97MetfsTer3	Pathogenic/Likely_pathogenic	Hereditary_cancer-predisposing_syndrome|Familial_cancer_of_breast|Fanconi_anemia\x2c_complementation_group_J|Fanconi_anemia\x2c_complementation_group_J|Neoplasm_of_ovary	RCV000167103.1|RCV000197800.3|RCV000197800.3|RCV000410961.1|RCV000412074.1	rs763009188	.	.	.	1.65e-05	4.06e-06
17	7674229	7674229	C	T	missense_variant	coding	TP53	NM_000546.6	c.734G>A	p.Gly245Asp	Pathogenic/Likely_pathogenic	Squamous_cell_carcinoma_of_the_head_and_neck|Adenocarcinoma_of_stomach|Ovarian_Serous_Cystadenocarcinoma|Neoplasm_of_brain|Glioblastoma|Colorectal_Neoplasms|Uterine_Carcinosarcoma|Transitional_cell_carcinoma_of_the_bladder|Oesophageal_carcinoma|Adenocarcinoma_of_prostate|Pancreatic_adenocarcinoma|Hepatocellular_carcinoma|Adenocarcinoma_of_lung|Neoplasm_of_breast|Squamous_cell_carcinoma_of_lung|Br…	RCV000418643.1|RCV000421020.1|RCV000421739.1|RCV000424123.1|RCV000426568.1|RCV000428216.1|RCV000429303.1|RCV000430431.1|RCV000434145.1|RCV000434833.1|RCV000435854.1|RCV000437258.1|RCV000438982.1|RCV000439974.1|RCV000443716.1|RCV000444483.1\x2cRCV000255018.1|RCV000420237.1|RCV000421477.1|RCV000422531.1|RCV000425368.1|RCV000426521.1|RCV000427619.1|RCV000428537.1|RCV000431752.1|RCV000432804.1|RCV000…	rs121912656	COSM3388189;COSM43606;COSM179807;COSM179805;COSM1640832;COSM179806	1(vulva);11(ovary);1(bone);13(breast);1(NS);4(stomach);15(haematopoietic_and_lymphoid_tissue);1(kidney);2(urinary_tract);6(pancreas);6(liver);26(oesophagus);4(skin);4(prostate);7(lung);7(upper_aerodigestive_tract);29(large_intestine);4(central_nervous_system)	.	.	4.06e-06
19	43546884	43546884	C	G	missense_variant,splice_region_variant	coding	XRCC1	NM_006297.3	c.1293G>C	p.Lys431Asn	Pathogenic	.	.	rs761564262	.	.	.	3.31e-05	3.25e-05
22	28734664	28734664	G	A	stop_gained	coding	CHEK2	NM_007194.4	c.58C>T	p.Gln20Ter	Pathogenic/Likely_pathogenic	not_specified|not_provided|Familial_cancer_of_breast	RCV000120552.1|RCV000255024.1|RCV000458969.1	rs536907995	.	.	0.0002	0.0001	0.0001
Icelander
2	47414420	47414420	T	-	splice_donor_variant,intron_variant	coding	MSH2	NM_000251.3	c.942+2del	-	Likely_pathogenic	Lynch_syndrome	RCV000076755.2	rs587779194	.	.	.	.	.
3	10087249	10087252	AACA	-	frameshift_variant	coding	FANCD2	NM_001018115.3	c.3453_3456del	p.Asn1151LysfsTer46	Pathogenic	.	.	.	.	.	.	.	.
13	32379465	32379465	C	-	frameshift_variant	coding	BRCA2	NM_000059.4	c.8904del	p.Val2969CysfsTer7	Pathogenic	Breast-ovarian_cancer\x2c_familial_2|Hereditary_breast_and_ovarian_cancer_syndrome|Hereditary_cancer-predisposing_syndrome|not_provided	RCV000031775.6|RCV000045650.4|RCV000131370.4|RCV000216861.2	rs80359730	.	.	.	.	.
17	43094549	43094550	AT	-	frameshift_variant	coding	BRCA1	NM_007294.4	c.981_982del	p.Cys328Ter	Pathogenic	Hereditary_breast_and_ovarian_cancer_syndrome|Breast-ovarian_cancer\x2c_familial_1|Hereditary_cancer-predisposing_syndrome|Breast_cancer	RCV000049211.3|RCV000077636.5|RCV000162892.2|RCV000240695.1	rs80357772	.	.	.	.	.
17	43104177	43104177	C	-	frameshift_variant	coding	BRCA1	NM_007294.4	c.386del	p.Gly129AlafsTer34	Pathogenic	.	.	.	.	.	.	.	.
17	7674238	7674238	C	T	missense_variant	coding	TP53	NM_000546.6	c.725G>A	p.Cys242Tyr	Pathogenic	Neoplasm_of_breast|Uterine_Carcinosarcoma|Glioblastoma|Squamous_cell_carcinoma_of_lung|Hepatocellular_carcinoma|Chronic_lymphocytic_leukemia|Oesophageal_carcinoma|Transitional_cell_carcinoma_of_the_bladder|Adenocarcinoma_of_stomach|Adenocarcinoma_of_lung|Squamous_cell_carcinoma_of_the_head_and_neck\x2cLi-Fraumeni-like_syndrome|Hereditary_cancer-predisposing_syndrome|Li-Fraumeni_syndrome|Squamous_…	RCV000417879.1|RCV000418512.1|RCV000424746.1|RCV000425032.1|RCV000427153.1|RCV000433671.1|RCV000435022.1|RCV000435743.1|RCV000438269.1|RCV000442305.1|RCV000442449.1\x2cRCV000013148.23|RCV000129809.2|RCV000231770.2|RCV000419041.1|RCV000419614.1|RCV000424935.1|RCV000425602.1|RCV000426292.1|RCV000430302.1|RCV000432119.1|RCV000436295.1|RCV000436867.1|RCV000440992.1|RCV000442015.1	rs121912655	COSM251398;COSM251396;COSM2744612;COSM3403262;COSM251397;COSM10646	1(salivary_gland);4(ovary);6(breast);2(bone);2(haematopoietic_and_lymphoid_tissue);1(stomach);1(soft_tissue);3(urinary_tract);5(liver);2(oesophagus);1(skin);1(prostate);6(lung);3(upper_aerodigestive_tract);5(large_intestine);6(central_nervous_system)	.	.	0
17	7675077	7675077	G	C	missense_variant	coding	TP53	NM_000546.6	c.535C>G	p.His179Asp	Likely_pathogenic	not_provided|Squamous_cell_carcinoma_of_the_skin|Glioblastoma|Squamous_cell_carcinoma_of_lung|Adenocarcinoma_of_stomach|Small_cell_lung_cancer|Squamous_cell_carcinoma_of_the_head_and_neck|Neoplasm_of_brain|Acute_myeloid_leukemia|Pancreatic_adenocarcinoma|Ovarian_Serous_Cystadenocarcinoma|Colorectal_Neoplasms|Malignant_melanoma_of_skin|Malignant_neoplasm_of_body_of_uterus|Carcinoma_of_gallbladder|…	RCV000115726.3|RCV000419024.1|RCV000419735.1|RCV000423020.1|RCV000423688.1|RCV000424007.1|RCV000424716.1|RCV000427283.1|RCV000428854.1|RCV000430411.1|RCV000431087.1|RCV000434379.1|RCV000434725.1|RCV000435360.1|RCV000436095.1|RCV000436304.1|RCV000440222.1|RCV000441827.1|RCV000444227.1|RCV000444364.1\x2cRCV000419821.1|RCV000420116.1|RCV000421694.1|RCV000423899.1|RCV000424030.1|RCV000425288.1|RCV000…	.	COSM707887;COSM707884;COSM707886;COSM44776;COSM707885;COSM2744838;COSM3958834	1(salivary_gland);1(ovary);1(breast);3(haematopoietic_and_lymphoid_tissue);1(kidney);3(oesophagus);4(lung);3(upper_aerodigestive_tract);2(central_nervous_system)	.	.	.
17	7675175	7675175	C	T	stop_gained	coding	TP53	NM_000546.6	c.437G>A	p.Trp146Ter	Pathogenic	.	.	.	COSM1158447;COSM1158445;COSM1158446;COSM1640860;COSM3378359;COSM1158448;COSM43609	6(ovary);2(breast);7(haematopoietic_and_lymphoid_tissue);2(stomach);2(soft_tissue);2(urinary_tract);4(pancreas);1(peritoneum);3(liver);4(oesophagus);1(adrenal_gland);3(skin);2(prostate);1(lung);3(upper_aerodigestive_tract);8(large_intestine);2(central_nervous_system)	.	.	0
17	7676381	7676381	C	G	splice_donor_variant	coding	TP53	NM_000546.6	c.96+1G>C	-	Pathogenic	.	.	.	COSM5444225;COSM5444229;COSM5444230;COSM5444226;COSM5444227;COSM5444228	1(oesophagus)	.	.	.
African
1	45332057	45332057	C	-	frameshift_variant	coding	MUTYH	NM_001048174.2	c.879del	p.Ser294AlafsTer86	Pathogenic	.	.	rs776362892	.	.	.	1.65e-05	1.22e-05
1	45332959	45332959	T	A	stop_gained,splice_region_variant	coding	MUTYH	NM_001048174.2	c.379A>T	p.Lys127Ter	Pathogenic	Hereditary_cancer-predisposing_syndrome	RCV000216618.1	.	.	.	.	.	4.08e-06
2	214728743	214728743	C	T	stop_gained	coding	BARD1	NM_000465.4	c.2267G>A	p.Trp756Ter	Pathogenic/Likely_pathogenic	.	.	.	.	.	.	.	4.07e-06
2	3552227	3552227	-	C	frameshift_variant	coding	RNASEH1	NM_002936.6	c.325dup	p.Glu109GlyfsTer21	Likely_pathogenic	.	.	.	.	.	.	.	4.06e-06
2	47799332	47799333	TA	-	frameshift_variant	coding	MSH6	NM_000179.3	c.1350_1351del	p.Phe451HisfsTer12	Pathogenic	Lynch_syndrome	RCV000228751.1	.	.	.	.	.	4.07e-06
2	47799422	47799422	T	A	missense_variant	coding	MSH6	NM_000179.3	c.1439T>A	p.Val480Glu	Pathogenic	.	.	.	.	.	.	.	4.07e-06
2	47806216	47806216	-	AACA	frameshift_variant	coding	MSH6	NM_000179.3	c.3660_3663dup	p.Phe1222AsnfsTer3	Pathogenic/Likely_pathogenic	.	.	rs752404604	.	.	.	8.27e-06	4.07e-06
2	47806286	47806286	-	TTAT	frameshift_variant	coding	MSH6	NM_000179.3	c.3732_3735dup	p.Ser1246IlefsTer30	Pathogenic/Likely_pathogenic	.	.	.	.	.	.	.	.
3	14170440	14170440	-	C	frameshift_variant	coding	XPC	NM_004628.5	c.409dup	p.Glu137GlyfsTer4	Likely_pathogenic	.	.	.	.	.	.	.	4.07e-06
5	132579343	132579343	-	TT	frameshift_variant	coding	RAD50	NM_005732.4	c.393_394insTT	p.Lys132LeufsTer10	Pathogenic	.	.	.	.	.	.	.	4.06e-06
5	132588728	132588728	C	T	stop_gained	coding	RAD50	NM_005732.4	c.1093C>T	p.Arg365Ter	Pathogenic/Likely_pathogenic	.	.	.	.	.	.	.	.
5	132591390	132591390	-	GA	frameshift_variant	coding	RAD50	NM_005732.4	c.1620_1621insAG	p.Leu541SerfsTer2	Pathogenic	.	.	rs764968413	.	.	.	8.43e-06	4.1e-06
5	132595617	132595617	C	T	stop_gained	coding	RAD50	NM_005732.4	c.2014C>T	p.Gln672Ter	Pathogenic	.	.	rs142947311	COSM1310528;COSM1310529	1(urinary_tract)	.	.	4.06e-06
5	60898317	60898317	G	A	stop_gained	coding	ERCC8	NM_000082.4	c.802C>T	p.Arg268Ter	Pathogenic	.	.	rs370657735	.	.	.	8.26e-06	4.07e-06
5	60899666	60899666	C	-	frameshift_variant	coding	ERCC8	NM_000082.4	c.679del	p.Asp227IlefsTer43	Likely_pathogenic	.	.	.	.	.	.	.	.
5	60918314	60918314	G	T	stop_gained	coding	ERCC8	NM_000082.4	c.350C>A	p.Ser117Ter	Likely_pathogenic	.	.	rs545036754	.	.	0.0002	8.28e-06	4.08e-06
5	80670102	80670102	A	-	frameshift_variant	coding	MSH3	NM_002439.5	c.586del	p.Thr196HisfsTer37	Pathogenic	.	.	rs771721952	.	.	.	2.54e-05	1.63e-05
5	80741518	80741518	-	T	frameshift_variant	coding	MSH3	NM_002439.5	c.1625dup	p.Leu542PhefsTer12	Pathogenic	.	.	rs775863622	.	.	.	1.65e-05	8.13e-06
5	80741549	80741549	G	A	splice_donor_variant	coding	MSH3	NM_002439.5	c.1653+1G>A	-	Likely_pathogenic	.	.	rs550626088	.	.	0.0002	8.27e-06	4.06e-06
5	83195935	83195935	C	T	stop_gained,splice_region_variant	coding	XRCC4	NM_003401.5	c.481C>T	p.Arg161Ter	Pathogenic	Short_stature\x2c_microcephaly\x2c_and_endocrine_dysfunction	RCV000190526.3	rs779773463	.	.	.	8.38e-06	8.27e-06
5	83195936	83195936	G	A	missense_variant,splice_region_variant	coding	XRCC4	NM_003401.5	c.482G>A	p.Arg161Gln	Pathogenic	Short_stature\x2c_microcephaly\x2c_and_endocrine_dysfunction	RCV000190528.4	rs797045017	.	.	.	.	4.14e-06
6	35457955	35457955	C	T	stop_gained	coding	FANCE	NM_021922.3	c.940C>T	p.Gln314Ter	Pathogenic	.	.	rs760150539	.	.	.	8.24e-06	4.06e-06
7	5986838	5986838	G	A	stop_gained	coding	PMS2	NM_000535.7	c.1927C>T	p.Gln643Ter	Pathogenic	Lynch_syndrome|Turcot_syndrome|Hereditary_cancer-predisposing_syndrome|not_provided	RCV000076835.2|RCV000148733.1|RCV000164116.1|RCV000223612.1	rs63751422	.	.	.	.	.
7	5989799	5989799	C	T	splice_donor_variant	coding	PMS2	NM_000535.7	c.1144+1G>A	-	Pathogenic/Likely_pathogenic	Lynch_syndrome|not_provided	RCV000149895.2|RCV000213090.1	rs373885654	.	.	.	1.65e-05	8.13e-06
8	89953434	89953434	-	C	frameshift_variant	coding	NBN	NM_002485.5	c.1654dup	p.Glu552GlyfsTer4	Pathogenic	.	.	rs760237820	.	.	.	8.24e-06	4.07e-06
8	89955422	89955425	TATT	-	frameshift_variant	coding	NBN	NM_002485.5	c.1255_1258del	p.Asn419LeufsTer5	Pathogenic/Likely_pathogenic	.	.	.	.	.	.	.	4.06e-06
8	89955525	89955526	TT	-	frameshift_variant	coding	NBN	NM_002485.5	c.1154_1155del	p.Lys385SerfsTer27	Pathogenic	.	.	rs748513310	.	.	.	8.49e-06	4.08e-06
8	89984524	89984524	C	T	splice_donor_variant	coding	NBN	NM_002485.5	c.37+1G>A	-	Likely_pathogenic	Hereditary_cancer-predisposing_syndrome|Microcephaly\x2c_normal_intelligence_and_immunodeficiency	RCV000165888.3|RCV000470841.1	rs574673404	.	.	0.0002	1.78e-05	1.25e-05
9	95171078	95171078	C	T	splice_donor_variant	coding	FANCC	NM_000136.3	c.521+1G>A	-	Pathogenic/Likely_pathogenic	Fanconi_anemia	RCV000230742.1	rs145394391	.	.	.	.	8.13e-06
9	97684950	97684950	G	A	stop_gained	coding	XPA	NM_000380.4	c.646C>T	p.Gln216Ter	Likely_pathogenic	.	.	rs761978351	.	.	.	8.25e-06	8.13e-06
9	97687104	97687104	-	TA	frameshift_variant	coding	XPA	NM_000380.4	c.545_546dup	p.Lys183Ter	Likely_pathogenic	.	.	rs757098056	.	.	.	8.29e-06	4.1e-06
9	97689592	97689592	C	A	stop_gained	coding	XPA	NM_000380.4	c.331G>T	p.Glu111Ter	Pathogenic	.	.	rs769255883	COSM1103053	1(endometrium)	.	2.58e-05	1.63e-05
10	49470853	49470865	AGATGGCATTTGG	-	frameshift_variant	coding	ERCC6	NM_000124.4	c.3095_3107del	p.Pro1032GlnfsTer28	Pathogenic	.	.	rs755974092	.	.	.	1.65e-05	1.22e-05
10	49472461	49472461	G	A	stop_gained	coding	ERCC6	NM_000124.4	c.2839C>T	p.Arg947Ter	Pathogenic/Likely_pathogenic	.	.	.	.	.	.	.	1.22e-05
10	68470051	68470052	CA	-	stop_gained,frameshift_variant	coding	DNA2	NM_001080449.3	c.186_187del	p.Cys62Ter	Likely_pathogenic	.	.	rs777604935	.	.	.	8.37e-06	4.06e-06
11	108250804	108250804	C	T	stop_gained	coding	ATM	NM_000051.4	c.1339C>T	p.Arg447Ter	Pathogenic/Likely_pathogenic	Hereditary_cancer-predisposing_syndrome|Ataxia-telangiectasia_syndrome|not_provided	RCV000115141.6|RCV000169409.1|RCV000211960.2	rs587779815	COSM3733239;COSM3733240	1(haematopoietic_and_lymphoid_tissue);1(skin)	.	8.25e-06	8.13e-06
11	108287622	108287632	ATTTACCAGAG	-	frameshift_variant	coding	ATM	NM_000051.4	c.4019_4029del	p.Leu1340CysfsTer10	Pathogenic/Likely_pathogenic	Ataxia-telangiectasia_syndrome	RCV000410743.1	.	.	.	.	.	4.11e-06
11	108292618	108292618	G	C	splice_acceptor_variant	coding	ATM	NM_000051.4	c.4437-1G>C	-	Pathogenic/Likely_pathogenic	not_provided\x2cHereditary_cancer-predisposing_syndrome	RCV000255051.1\x2cRCV000216400.1	rs759520465	COSM3786969;COSM3786968	2(pancreas)	.	8.24e-06	4.07e-06
11	108332886	108332886	G	A	stop_gained	coding	ATM	NM_000051.4	c.7913G>A	p.Trp2638Ter	Pathogenic/Likely_pathogenic	Hereditary_cancer-predisposing_syndrome|Ataxia-telangiectasia_syndrome|not_provided	RCV000129649.5|RCV000169621.2|RCV000212077.2	rs377349459	.	.	.	8.3e-06	4.08e-06
11	108343228	108343228	C	-	frameshift_variant	coding	ATM	NM_000051.4	c.8278del	p.Leu2760SerfsTer46	Pathogenic	.	.	.	.	.	.	.	4.06e-06
11	108354838	108354848	GAGAAACTCTC	-	frameshift_variant	coding	ATM	NM_000051.4	c.8814_8824del	p.Met2938IlefsTer14	Pathogenic/Likely_pathogenic	Ataxia-telangiectasia_syndrome	RCV000408957.1	rs758814126	.	.	.	1.65e-05	8.12e-06
11	22625309	22625309	C	A	stop_gained	coding	FANCF	NM_022725.4	c.502G>T	p.Glu168Ter	Pathogenic	.	.	rs754014970	.	.	.	8.36e-06	4.07e-06
11	22625559	22625581	CTGGAAGTTCGCTAATCCCGGAA	-	frameshift_variant	coding	FANCF	NM_022725.4	c.230_252del	p.Val77GlyfsTer6	Pathogenic	Fanconi_anemia\x2c_complementation_group_F|Fanconi_anemia	RCV000006712.3|RCV000472440.1	rs730880277	.	.	.	8.37e-06	8.15e-06
11	94437234	94437234	G	-	frameshift_variant,splice_region_variant	coding	MRE11	NM_005591.4	c.1869del	p.Phe624LeufsTer20	Pathogenic	.	.	.	.	.	.	.	4.07e-06
11	94470473	94470473	T	A	stop_gained,splice_region_variant	coding	MRE11	NM_005591.4	c.1015A>T	p.Lys339Ter	Pathogenic/Likely_pathogenic	.	.	.	.	.	.	.	4.07e-06
12	109103495	109103495	C	T	stop_gained	coding	UNG	NM_080911.3	c.685C>T	p.Arg229Ter	Pathogenic	.	.	rs772214871	COSM1726489;COSM1726490	1(liver)	.	8.24e-06	4.06e-06
13	32332517	32332517	C	T	stop_gained	coding	BRCA2	NM_000059.4	c.1039C>T	p.Gln347Ter	Pathogenic	.	.	.	.	.	.	.	4.11e-06
13	32332779	32332782	AAAG	-	frameshift_variant	coding	BRCA2	NM_000059.4	c.1310_1313del	p.Lys437IlefsTer22	Pathogenic	Breast-ovarian_cancer\x2c_familial_2|not_provided|Hereditary_cancer-predisposing_syndrome|Hereditary_breast_and_ovarian_cancer_syndrome	RCV000031318.13|RCV000043779.7|RCV000131062.3|RCV000203644.3	rs80359280	COSM5951111;COSM5951112	1(oesophagus)	.	8.3e-06	4.18e-06
13	32333364	32333370	TTACATT	-	frameshift_variant	coding	BRCA2	NM_000059.4	c.1887_1893del	p.Thr630GlnfsTer12	Pathogenic	.	.	.	.	.	.	.	4.24e-06
13	32336633	32336637	TTATA	-	frameshift_variant	coding	BRCA2	NM_000059.4	c.2279_2283del	p.Leu760Ter	Pathogenic	Breast-ovarian_cancer\x2c_familial_2	RCV000241395.1	rs770648856	.	.	.	8.25e-06	4.07e-06
13	32337312	32337312	-	G	frameshift_variant	coding	BRCA2	NM_000059.4	c.2957_2958insG	p.Asn986LysfsTer2	Pathogenic	Breast-ovarian_cancer\x2c_familial_2|Hereditary_cancer-predisposing_syndrome|Hereditary_breast_and_ovarian_cancer_syndrome\x2cHereditary_breast_and_ovarian_cancer_syndrome|Breast-ovarian_cancer\x2c_familial_2|not_provided|Hereditary_cancer-predisposing_syndrome	RCV000031392.6|RCV000131097.3|RCV000463291.1\x2cRCV000044094.4|RCV000077700.5|RCV000160274.3|RCV000213454.1	rs80359365	.	.	.	.	4.08e-06
13	32338825	32338828	ACTG	-	frameshift_variant	coding	BRCA2	NM_000059.4	c.4471_4474del	p.Leu1491LysfsTer12	Pathogenic	Hereditary_breast_and_ovarian_cancer_syndrome|Breast-ovarian_cancer\x2c_familial_2|Hereditary_cancer-predisposing_syndrome	RCV000044419.3|RCV000077326.4|RCV000217416.1	rs80359451	.	.	.	.	4.08e-06
13	32339966	32339970	AGTAA	-	frameshift_variant	coding	BRCA2	NM_000059.4	c.5616_5620del	p.Lys1872AsnfsTer2	Pathogenic	not_provided|Breast-ovarian_cancer\x2c_familial_2|Hereditary_cancer-predisposing_syndrome|Hereditary_breast_and_ovarian_cancer_syndrome|Familial_cancer_of_breast	RCV000044697.6|RCV000077356.6|RCV000131113.3|RCV000195403.2|RCV000473703.1	rs80359525	.	.	.	1.66e-05	4.13e-06
13	32354877	32354877	C	T	stop_gained	coding	BRCA2	NM_000059.4	c.7024C>T	p.Gln2342Ter	Pathogenic	Familial_cancer_of_breast|Breast-ovarian_cancer\x2c_familial_2|Hereditary_cancer-predisposing_syndrome	RCV000045122.4|RCV000077396.5|RCV000215667.1	rs80358928	.	.	.	.	4.06e-06
13	32394726	32394726	C	G	stop_gained	coding	BRCA2	NM_000059.4	c.9294C>G	p.Tyr3098Ter	Pathogenic	Breast-ovarian_cancer\x2c_familial_2|Familial_cancer_of_breast\x2cBreast-ovarian_cancer\x2c_familial_2|Hereditary_breast_and_ovarian_cancer_syndrome|not_provided|Hereditary_cancer-predisposing_syndrome|Breast-ovarian_cancer\x2c_familial_1|Familial_cancer_of_breast	RCV000031811.6|RCV000045783.2\x2cRCV000031812.6|RCV000045784.5|RCV000074562.7|RCV000131041.3|RCV000210096.1|RCV000465472.1	rs80359200	.	.	.	8.51e-06	8.14e-06
13	32398403	32398403	-	ATTT	frameshift_variant	coding	BRCA2	NM_000059.4	c.9891_9894dup	p.Gln3299IlefsTer29	Pathogenic	Familial_cancer_of_breast|Hereditary_cancer-predisposing_syndrome|Breast-ovarian_cancer\x2c_familial_2|Hereditary_breast_and_ovarian_cancer_syndrome	RCV000160313.1|RCV000222723.1|RCV000241133.1|RCV000470171.1	rs756361508	.	.	.	8.24e-06	.
14	45188848	45188849	AT	-	frameshift_variant	coding	FANCM	NM_020937.4	c.4826_4827del	p.Asp1609GlyfsTer11	Likely_pathogenic	.	.	.	.	.	.	.	4.07e-06
14	45196361	45196361	C	-	frameshift_variant	coding	FANCM	NM_020937.4	c.5530del	p.Gln1844LysfsTer2	Pathogenic	.	.	rs778451008	.	.	.	1.65e-05	1.22e-05
15	40729620	40729620	C	T	stop_gained	coding	RAD51	NM_002875.5	c.760C>T	p.Arg254Ter	Pathogenic	Mirror_movements_2	RCV000022747.5	rs199925463	.	.	.	.	4.06e-06
15	89307644	89307645	TG	-	frameshift_variant	coding	FANCI	NM_001113378.2	c.3626_3627del	p.Cys1209LeufsTer10	Pathogenic	Fanconi_anemia	RCV000203795.1	rs770318990	.	.	.	8.24e-06	4.06e-06
15	90749938	90749938	C	T	stop_gained	coding	BLM	NM_000057.4	c.670C>T	p.Gln224Ter	Pathogenic	.	.	.	.	.	.	.	4.07e-06
15	90803601	90803601	A	T	stop_gained	coding	BLM	NM_000057.4	c.3439A>T	p.Lys1147Ter	Pathogenic/Likely_pathogenic	.	.	rs770311534	.	.	.	8.24e-06	.
16	23623077	23623077	G	-	frameshift_variant	coding	PALB2	NM_024675.4	c.2888del	p.Ser963LeufsTer4	Pathogenic	not_provided	RCV000133482.1	rs587776420	.	.	.	8.25e-06	4.06e-06
16	23626254	23626254	A	T	stop_gained	coding	PALB2	NM_024675.4	c.2730T>A	p.Tyr910Ter	Pathogenic	Familial_cancer_of_breast	RCV000459119.1	.	.	.	.	.	8.12e-06
16	23630034	23630034	G	-	frameshift_variant	coding	PALB2	NM_024675.4	c.2120del	p.Pro707LeufsTer2	Pathogenic	Hereditary_cancer-predisposing_syndrome|not_provided|Familial_cancer_of_breast	RCV000116079.3|RCV000254677.1|RCV000409069.1	rs587780210	.	.	.	8.24e-06	8.12e-06
16	23635067	23635067	G	-	frameshift_variant	coding	PALB2	NM_024675.4	c.1479del	p.Thr494LeufsTer67	Pathogenic	Familial_cancer_of_breast|Hereditary_cancer-predisposing_syndrome	RCV000114478.1|RCV000129889.4	rs515726071	.	.	.	2.47e-05	8.12e-06
16	23636313	23636314	AC	-	frameshift_variant	coding	PALB2	NM_024675.4	c.232_233del	p.Val78LeufsTer2	Pathogenic	.	.	rs776284609	.	.	.	9.82e-06	4.12e-06
16	23638099	23638099	C	A	stop_gained	coding	PALB2	NM_024675.4	c.79G>T	p.Glu27Ter	Pathogenic	Familial_cancer_of_breast|not_provided|Hereditary_cancer-predisposing_syndrome	RCV000228882.1|RCV000255635.1|RCV000454231.1	.	.	.	.	.	8.12e-06
16	89740012	89740013	AG	-	frameshift_variant	coding	FANCA	NM_000135.4	c.3915_3916del	p.Phe1306SerfsTer6	Pathogenic	.	.	rs748453841	.	.	.	8.24e-06	8.12e-06
16	89764889	89764889	C	A	splice_donor_variant	coding	FANCA	NM_000135.4	c.2778+1G>T	-	Pathogenic	.	.	rs140180549	.	.	.	.	.
16	89778812	89778813	CT	-	frameshift_variant	coding	FANCA	NM_000135.4	c.1814_1815del	p.Glu605ValfsTer7	Pathogenic	.	.	rs759899153	.	.	.	8.24e-06	4.06e-06
16	89814615	89814615	T	A	splice_acceptor_variant	coding	FANCA	NM_000135.4	c.190-2A>T	-	Likely_pathogenic	.	.	rs183350210	.	.	0.0002	1.65e-05	2.03e-05
17	35107384	35107384	-	G	frameshift_variant	coding	RAD51D	NM_002878.3	c.326dup	p.Gly110ArgfsTer2	Pathogenic	not_provided|Breast-ovarian_cancer\x2c_familial_4	RCV000160938.2|RCV000178184.1	rs730882119	.	.	.	.	4.06e-06
17	35119114	35119114	G	T	stop_gained	coding	RAD51D	NM_002878.3	c.141C>A	p.Tyr47Ter	Pathogenic	.	.	rs771077929	.	.	.	8.25e-06	4.06e-06
17	43051071	43051071	A	C	missense_variant	coding	BRCA1	NM_007294.4	c.5324T>G	p.Met1775Arg	Pathogenic	Breast-ovarian_cancer\x2c_familial_1|not_provided|Hereditary_cancer-predisposing_syndrome|Hereditary_breast_and_ovarian_cancer_syndrome\x2cBreast-ovarian_cancer\x2c_familial_1|Familial_cancer_of_breast	RCV000019264.9|RCV000048931.6|RCV000131375.4|RCV000167787.5\x2cRCV000019265.7|RCV000048930.2	rs41293463	.	.	.	.	1.22e-05
17	43063346	43063349	TTTC	-	frameshift_variant	coding	BRCA1	NM_007294.4	c.5177_5180del	p.Arg1726LysfsTer3	Pathogenic	Breast-ovarian_cancer\x2c_familial_1|not_provided|Hereditary_cancer-predisposing_syndrome|Hereditary_breast_and_ovarian_cancer_syndrome	RCV000031225.9|RCV000048843.6|RCV000131829.3|RCV000167855.5	rs80357975	.	.	.	8.33e-06	8.13e-06
17	43091443	43091443	G	C	stop_gained	coding	BRCA1	NM_007294.4	c.4088C>G	p.Ser1363Ter	Pathogenic	Breast-ovarian_cancer\x2c_familial_1|Hereditary_cancer-predisposing_syndrome|Hereditary_breast_and_ovarian_cancer_syndrome\x2cBreast-ovarian_cancer\x2c_familial_1	RCV000077139.2|RCV000216362.1|RCV000471702.1\x2cRCV000241411.2	.	.	.	.	.	4.07e-06
17	43106478	43106478	A	C	missense_variant	coding	BRCA1	NM_007294.4	c.190T>G	p.Cys64Gly	Pathogenic	Breast-ovarian_cancer\x2c_familial_1|Hereditary_breast_and_ovarian_cancer_syndrome|Hereditary_cancer-predisposing_syndrome|not_provided\x2cFamilial_cancer_of_breast|Breast-ovarian_cancer\x2c_familial_1|Hereditary_cancer-predisposing_syndrome	RCV000019228.10|RCV000047634.5|RCV000129894.3|RCV000235121.2\x2cRCV000047633.2|RCV000083174.4|RCV000130787.2	rs80357064	.	.	.	1.68e-05	4.07e-06
17	58694970	58694971	AA	-	frameshift_variant	coding	RAD51C	NM_058216.3	c.186_187del	p.Gln62HisfsTer10	Pathogenic	Hereditary_cancer-predisposing_syndrome|Fanconi_anemia\x2c_complementation_group_O	RCV000130769.2|RCV000459126.1	rs778370098	.	.	.	8.25e-06	4.06e-06
17	58703194	58703194	A	G	splice_acceptor_variant	coding	RAD51C	NM_058216.3	c.572-2A>G	-	Likely_pathogenic	.	.	rs145310733	.	.	.	8.28e-06	4.07e-06
17	61684041	61684041	-	AGCTGTCA	frameshift_variant	coding	BRIP1	NM_032043.3	c.3004_3005insTGACAGCT	p.Trp1002LeufsTer60	Pathogenic	Hereditary_cancer-predisposing_syndrome	RCV000165914.2	rs763443434	.	.	.	8.24e-06	4.07e-06
17	61684053	61684054	TT	-	frameshift_variant	coding	BRIP1	NM_032043.3	c.2992_2993del	p.Lys998GlufsTer3	Pathogenic/Likely_pathogenic	Familial_cancer_of_breast|Fanconi_anemia\x2c_complementation_group_J	RCV000227245.1|RCV000227245.1	.	.	.	.	.	4.07e-06
17	61686159	61686159	-	A	frameshift_variant	coding	BRIP1	NM_032043.3	c.2581dup	p.Ser861PhefsTer2	Pathogenic	.	.	.	.	.	.	.	4.07e-06
17	61743015	61743015	G	A	stop_gained,splice_region_variant	coding	BRIP1	NM_032043.3	c.2377C>T	p.Gln793Ter	Pathogenic/Likely_pathogenic	Hereditary_cancer-predisposing_syndrome	RCV000131801.2	rs587782574	.	.	.	8.25e-06	4.06e-06
17	61801266	61801267	TG	-	frameshift_variant	coding	BRIP1	NM_032043.3	c.1126_1127del	p.Gln376AsnfsTer18	Pathogenic/Likely_pathogenic	Hereditary_cancer-predisposing_syndrome	RCV000116118.5	rs587780224	.	.	.	8.24e-06	4.06e-06
17	61861471	61861471	-	G	frameshift_variant	coding	BRIP1	NM_032043.3	c.68dup	p.Ser24ValfsTer45	Pathogenic	.	.	.	.	.	.	.	4.06e-06
17	7673779	7673779	C	T	missense_variant	coding	TP53	NM_000546.6	c.841G>A	p.Asp281Asn	Pathogenic	Chronic_lymphocytic_leukemia|Squamous_cell_carcinoma_of_lung|Transitional_cell_carcinoma_of_the_bladder|Neoplasm_of_breast|Squamous_cell_carcinoma_of_the_head_and_neck|Pancreatic_adenocarcinoma|Multiple_myeloma|Adenocarcinoma_of_lung|Renal_cell_carcinoma|Adenocarcinoma_of_stomach|Ovarian_Serous_Cystadenocarcinoma|Squamous_cell_carcinoma_of_the_skin|Hepatocellular_carcinoma|Glioblastoma|Malignant_…	RCV000419187.1|RCV000419880.1|RCV000421597.1|RCV000422382.1|RCV000422971.1|RCV000424398.1|RCV000427237.1|RCV000429763.1|RCV000430133.1|RCV000431847.1|RCV000432647.1|RCV000436876.1|RCV000437480.1|RCV000438115.1|RCV000440017.1|RCV000442319.1|RCV000442636.1|RCV000443331.1\x2cRCV000418744.1|RCV000419869.1|RCV000420094.1|RCV000421295.1|RCV000422034.1|RCV000423682.1|RCV000427301.1|RCV000427507.1|RCV000…	rs764146326	COSM3932743;COSM43596;COSM1649341;COSM146336	1(salivary_gland);4(breast);1(stomach);6(haematopoietic_and_lymphoid_tissue);4(urinary_tract);1(pancreas);2(liver);1(oesophagus);1(autonomic_ganglia);2(skin);2(lung);4(large_intestine);2(central_nervous_system);1(biliary_tract);1(endometrium)	.	8.32e-06	4.06e-06
19	45357482	45357484	TGA	-	inframe_deletion	coding	ERCC2	NM_000400.4	c.1367_1369del	p.Ile456del	Likely_pathogenic	.	.	rs750123656	.	.	.	8.25e-06	4.06e-06
22	28689188	28689188	C	-	frameshift_variant	coding	CHEK2	NM_007194.4	c.1489del	p.Asp497IlefsTer16	Pathogenic/Likely_pathogenic	Hereditary_cancer-predisposing_syndrome|Familial_cancer_of_breast	RCV000164545.1|RCV000226984.1	rs774175654	.	.	.	8.87e-06	4.37e-06
22	28711908	28711909	CT	-	splice_donor_variant,coding_sequence_variant	coding	CHEK2	NM_007194.4	c.792_792+1del	-	Likely_pathogenic	.	.	rs774831804	.	.	.	8.25e-06	4.07e-06
American
1	45332836	45332836	T	G	splice_acceptor_variant	coding	MUTYH	NM_001048174.2	c.421-2A>C	-	Likely_pathogenic	Hereditary_cancer-predisposing_syndrome	RCV000166350.1	rs786203161	.	.	.	.	4.06e-06
2	214752459	214752462	GCTA	-	frameshift_variant	coding	BARD1	NM_000465.4	c.1662_1665del	p.Ser555ThrfsTer4	Pathogenic	.	.	rs753537518	.	.	.	8.25e-06	4.06e-06
2	214769242	214769242	C	T	stop_gained	coding	BARD1	NM_000465.4	c.1385G>A	p.Trp462Ter	Pathogenic	.	.	.	.	.	.	.	4.06e-06
2	47403261	47403261	C	T	stop_gained	coding	MSH2	NM_000251.3	c.70C>T	p.Gln24Ter	Pathogenic	not_provided	RCV000115541.3	rs587779976	.	.	.	.	4.66e-06
2	47482777	47482777	A	C	splice_acceptor_variant	coding	MSH2	NM_000251.3	c.2635-2A>C	-	Likely_pathogenic	.	.	.	.	.	.	.	4.07e-06
2	47799151	47799151	G	-	frameshift_variant	coding	MSH6	NM_000179.3	c.1168del	p.Asp390IlefsTer21	Pathogenic	.	.	rs753796271	.	.	.	8.24e-06	2.03e-05
2	47800252	47800253	AC	-	frameshift_variant	coding	MSH6	NM_000179.3	c.2269_2270del	p.Thr757ProfsTer6	Pathogenic	not_provided	RCV000216101.1	.	.	.	.	.	4.07e-06
3	10067227	10067227	C	T	stop_gained	coding	FANCD2	NM_001018115.3	c.2404C>T	p.Gln802Ter	Pathogenic	.	.	.	.	.	.	.	4.07e-06
3	14158239	14158240	CA	-	frameshift_variant	coding	XPC	NM_004628.5	c.1643_1644del	p.Val548AlafsTer25	Pathogenic	Xeroderma_pigmentosum\x2c_group_C	RCV000000286.4	rs754532049	.	.	.	8.28e-06	2.03e-05
3	142549607	142549607	G	A	stop_gained	coding	ATR	NM_001184.4	c.3043C>T	p.Arg1015Ter	Pathogenic	.	.	.	.	.	.	.	8.15e-06
3	37004444	37004444	C	T	missense_variant	coding	MLH1	NM_000249.4	c.350C>T	p.Thr117Met	Pathogenic	Lynch_syndrome|not_provided\x2cLynch_syndrome_II|Lynch_syndrome|Lynch_syndrome_I|not_provided	RCV000075665.2|RCV000202256.1\x2cRCV000018626.23|RCV000075666.5|RCV000144599.1|RCV000160518.3	rs63750781	.	.	.	.	4.06e-06
3	37020356	37020356	A	G	missense_variant	coding	MLH1	NM_000249.4	c.931A>G	p.Lys311Glu	Likely_pathogenic	Hereditary_cancer-predisposing_syndrome|Lynch_syndrome	RCV000216819.1|RCV000473970.1	.	.	.	.	.	4.06e-06
3	37020434	37020434	-	C	frameshift_variant	coding	MLH1	NM_000249.4	c.1011dup	p.Asn338GlnfsTer24	Pathogenic	Lynch_syndrome	RCV000075073.3	rs63750677	.	.	.	.	4.06e-06
3	37047578	37047578	G	A	stop_gained	coding	MLH1	NM_000249.4	c.1791G>A	p.Trp597Ter	Pathogenic	.	.	.	.	.	.	.	4.06e-06
5	132579861	132579861	G	A	splice_acceptor_variant	coding	RAD50	NM_005732.4	c.552-1G>A	-	Likely_pathogenic	.	.	.	.	.	.	.	8.17e-06
5	132580068	132580068	T	C	splice_donor_variant	coding	RAD50	NM_005732.4	c.756+2T>C	-	Likely_pathogenic	Hereditary_cancer-predisposing_syndrome	RCV000164601.3	rs764122619	.	.	.	8.35e-06	4.08e-06
5	132589745	132589745	C	T	stop_gained	coding	RAD50	NM_005732.4	c.1360C>T	p.Gln454Ter	Pathogenic	.	.	rs758641567	.	.	.	8.34e-06	4.08e-06
5	132591957	132591957	-	A	frameshift_variant	coding	RAD50	NM_005732.4	c.1722dup	p.Gln575ThrfsTer3	Pathogenic	Hereditary_cancer-predisposing_syndrome	RCV000131751.2	rs587782543	.	.	.	.	.
5	132594950	132594950	C	G	stop_gained	coding	RAD50	NM_005732.4	c.1875C>G	p.Tyr625Ter	Pathogenic	Hereditary_cancer-predisposing_syndrome|Nijmegen_breakage_syndrome-like_disorder\x2cHereditary_cancer-predisposing_syndrome	RCV000205188.3|RCV000411352.1\x2cRCV000163046.4	rs149201802	.	.	.	7.42e-05	8.13e-05
5	132604038	132604038	-	A	frameshift_variant	coding	RAD50	NM_005732.4	c.2517dup	p.Asp840ArgfsTer5	Pathogenic	Hereditary_cancer-predisposing_syndrome	RCV000164416.1	rs786201897	.	.	.	.	8.13e-06
5	132609340	132609340	A	T	stop_gained	coding	RAD50	NM_005732.4	c.2980A>T	p.Lys994Ter	Pathogenic/Likely_pathogenic	Hereditary_cancer-predisposing_syndrome	RCV000213422.1	.	.	.	.	.	4.07e-06
5	60898322	60898322	T	G	missense_variant	coding	ERCC8	NM_000082.4	c.797A>C	p.Asp266Ala	Likely_pathogenic	.	.	.	.	.	.	.	4.06e-06
5	60918264	60918264	C	T	splice_donor_variant	coding	ERCC8	NM_000082.4	c.399+1G>A	-	Likely_pathogenic	.	.	rs774047625	.	.	.	8.29e-06	4.08e-06
5	80672253	80672253	C	T	stop_gained	coding	MSH3	NM_002439.5	c.802C>T	p.Arg268Ter	Pathogenic	.	.	rs201033017	.	.	.	.	1.22e-05
5	80672809	80672815	TTCCCGG	-	frameshift_variant	coding	MSH3	NM_002439.5	c.978_984del	p.Phe326LeufsTer3	Pathogenic	.	.	.	.	.	.	.	8.12e-06
5	80728931	80728931	G	T	stop_gained	coding	MSH3	NM_002439.5	c.1534G>T	p.Glu512Ter	Pathogenic	.	.	.	COSM1070690	1(endometrium)	.	.	4.06e-06
5	80813591	80813591	C	G	stop_gained	coding	MSH3	NM_002439.5	c.2663C>G	p.Ser888Ter	Pathogenic	.	.	.	.	.	.	.	8.12e-06
5	80875814	80875814	G	A	stop_gained	coding	MSH3	NM_002439.5	c.3366G>A	p.Trp1122Ter	Pathogenic	.	.	rs759757672	.	.	.	8.36e-06	8.14e-06
6	35455853	35455853	C	T	stop_gained	coding	FANCE	NM_021922.3	c.355C>T	p.Gln119Ter	Pathogenic	Fanconi_anemia\x2c_complementation_group_E	RCV000009247.2	rs121434505	.	.	.	1.65e-05	1.63e-05
7	5986760	5986760	T	-	frameshift_variant,splice_region_variant	coding	PMS2	NM_000535.7	c.2005del	p.Ser669ValfsTer19	Pathogenic	.	.	rs773174603	.	.	.	8.42e-06	4.37e-06
7	5995614	5995614	G	A	stop_gained	coding	PMS2	NM_000535.7	c.823C>T	p.Gln275Ter	Pathogenic	not_provided|Hereditary_cancer-predisposing_syndrome\x2cHereditary_cancer-predisposing_syndrome|Hereditary_nonpolyposis_colorectal_cancer_type_4	RCV000115704.3|RCV000216292.1\x2cRCV000130089.2|RCV000411073.1	rs587780062	.	.	.	8.26e-06	8.12e-06
7	5995635	5995635	T	C	splice_acceptor_variant	coding	PMS2	NM_000535.7	c.804-2A>G	-	Pathogenic	.	.	.	.	.	.	.	1.22e-05
7	5999277	5999277	T	C	splice_acceptor_variant	coding	PMS2	NM_000535.7	c.538-2A>G	-	Pathogenic/Likely_pathogenic	Lynch_syndrome	RCV000469599.1	rs758304323	.	.	.	8.24e-06	1.22e-05
7	6002452	6002452	C	T	splice_donor_variant	coding	PMS2	NM_000535.7	c.537+1G>A	-	Likely_pathogenic	not_provided\x2cLynch_syndrome	RCV000255096.1\x2cRCV000200046.2	rs863224450	.	.	.	.	4.13e-06
7	6002538	6002538	C	-	frameshift_variant	coding	PMS2	NM_000535.7	c.452del	p.Arg151ProfsTer50	Likely_pathogenic	.	.	rs745763201	.	.	.	8.3e-06	4.07e-06
7	6002545	6002545	A	-	frameshift_variant	coding	PMS2	NM_000535.7	c.445del	p.Tyr149ThrfsTer52	Pathogenic/Likely_pathogenic	not_provided	RCV000412857.1	rs769742496	.	.	.	8.28e-06	4.07e-06
7	6003688	6003688	A	G	splice_donor_variant	coding	PMS2	NM_000535.7	c.353+2T>C	-	Likely_pathogenic	Lynch_syndrome	RCV000468932.1	rs111466480	.	.	.	8.84e-06	4.35e-06
7	6003981	6003981	C	A	stop_gained	coding	PMS2	NM_000535.7	c.241G>T	p.Glu81Ter	Pathogenic/Likely_pathogenic	.	.	.	.	.	.	.	4.07e-06
8	89953574	89953574	C	-	frameshift_variant	coding	NBN	NM_002485.5	c.1515del	p.Glu505AspfsTer24	Pathogenic/Likely_pathogenic	.	.	rs759232053	.	.	.	8.26e-06	4.07e-06
8	89970363	89970363	C	A	splice_donor_variant	coding	NBN	NM_002485.5	c.896+1G>T	-	Likely_pathogenic	.	.	rs778306619	.	.	.	8.31e-06	4.07e-06
8	89981377	89981377	-	A	frameshift_variant	coding	NBN	NM_002485.5	c.317dup	p.Arg107GlnfsTer5	Pathogenic/Likely_pathogenic	Microcephaly\x2c_normal_intelligence_and_immunodeficiency	RCV000409799.1	rs745355767	.	.	.	8.28e-06	4.06e-06
9	35076871	35076871	C	G	splice_acceptor_variant	coding	FANCG	NM_004629.2	c.778-1G>C	-	Pathogenic	.	.	rs767518932	.	.	.	8.24e-06	4.06e-06
9	95149936	95149936	C	A	stop_gained	coding	FANCC	NM_000136.3	c.673G>T	p.Glu225Ter	Pathogenic	.	.	rs374176091	.	.	.	1.68e-05	1.3e-05
9	97684950	97684950	-	TTTC	frameshift_variant	coding	XPA	NM_000380.4	c.642_645dup	p.Gln216GlufsTer6	Likely_pathogenic	.	.	rs764582394	.	.	.	8.25e-06	8.13e-06
10	49524667	49524667	T	A	stop_gained	coding	ERCC6	NM_000124.4	c.763A>T	p.Lys255Ter	Pathogenic	.	.	.	.	.	.	.	8.14e-06
11	108227667	108227667	C	-	frameshift_variant	coding	ATM	NM_000051.4	c.43del	p.Leu15Ter	Pathogenic	Hereditary_cancer-predisposing_syndrome	RCV000223089.1	rs771887195	.	.	.	8.24e-06	4.06e-06
11	108227843	108227843	C	G	stop_gained	coding	ATM	NM_000051.4	c.140C>G	p.Ser47Ter	Pathogenic	Ataxia-telangiectasia_syndrome	RCV000196694.1	rs774185390	.	.	.	8.26e-06	4.07e-06
11	108244873	108244873	C	T	stop_gained	coding	ATM	NM_000051.4	c.748C>T	p.Arg250Ter	Pathogenic	Ataxia-telangiectasia_syndrome|Hereditary_cancer-predisposing_syndrome	RCV000196975.2|RCV000216766.1	rs772821016	COSM173211;COSM1135092	1(kidney);1(skin);5(large_intestine);2(endometrium)	.	8.24e-06	4.07e-06
11	108250810	108250810	G	-	frameshift_variant	coding	ATM	NM_000051.4	c.1348del	p.Glu450AsnfsTer23	Pathogenic	.	.	rs758004668	.	.	.	8.25e-06	.
11	108281097	108281097	-	A	frameshift_variant	coding	ATM	NM_000051.4	c.3510dup	p.Gln1171ThrfsTer8	Pathogenic	Hereditary_cancer-predisposing_syndrome|Ataxia-telangiectasia_syndrome	RCV000222552.1|RCV000462687.1	.	.	.	.	.	4.06e-06
11	108282796	108282796	G	A	stop_gained	coding	ATM	NM_000051.4	c.3663G>A	p.Trp1221Ter	Pathogenic	Ataxia-telangiectasia_syndrome|not_provided	RCV000206039.3|RCV000235543.1	rs864622490	COSM22522	1(haematopoietic_and_lymphoid_tissue)	.	.	4.07e-06
11	108292689	108292689	C	T	stop_gained	coding	ATM	NM_000051.4	c.4507C>T	p.Gln1503Ter	Pathogenic/Likely_pathogenic	.	.	.	.	.	.	.	1.22e-05
11	108293433	108293433	C	T	stop_gained	coding	ATM	NM_000051.4	c.4732C>T	p.Gln1578Ter	Likely_pathogenic	Ataxia-telangiectasia_syndrome	RCV000409906.1	rs746499337	.	.	.	8.25e-06	4.07e-06
11	108293479	108293479	T	C	splice_donor_variant	coding	ATM	NM_000051.4	c.4776+2T>C	-	Pathogenic	Ataxia-telangiectasia_syndrome\x2cAtaxia-telangiectasia_syndrome|Hereditary_cancer-predisposing_syndrome|not_provided	RCV000412136.1\x2cRCV000003170.5|RCV000130284.3|RCV000235350.2	rs587781927	.	.	.	.	4.09e-06
11	108310266	108310267	TA	-	frameshift_variant	coding	ATM	NM_000051.4	c.5870_5871del	p.Tyr1957CysfsTer7	Pathogenic	.	.	.	.	.	.	.	4.07e-06
11	108310305	108310305	C	T	stop_gained	coding	ATM	NM_000051.4	c.5908C>T	p.Gln1970Ter	Pathogenic	Hereditary_cancer-predisposing_syndrome|Ataxia-telangiectasia_syndrome|not_provided	RCV000129909.3|RCV000200350.2|RCV000235704.2	rs587781722	COSM5563386;COSM5563385	1(prostate)	.	.	3.26e-05
11	108312409	108312409	A	G	splice_acceptor_variant	coding	ATM	NM_000051.4	c.5919-2A>G	-	Likely_pathogenic	Hereditary_cancer-predisposing_syndrome	RCV000216360.1	rs746623393	.	.	.	8.26e-06	4.06e-06
11	108325308	108325308	A	G	splice_acceptor_variant	coding	ATM	NM_000051.4	c.6573-2A>G	-	Likely_pathogenic	.	.	rs751168951	.	.	.	1.67e-05	8.2e-06
11	108327701	108327701	G	A	stop_gained	coding	ATM	NM_000051.4	c.7032G>A	p.Trp2344Ter	Pathogenic	.	.	.	.	.	.	.	1.22e-05
11	108331470	108331470	T	G	stop_gained	coding	ATM	NM_000051.4	c.7542T>G	p.Tyr2514Ter	Pathogenic	Hereditary_cancer-predisposing_syndrome|not_specified|Ataxia-telangiectasia_syndrome	RCV000166968.1|RCV000430989.1|RCV000463235.1	rs777925486	.	.	.	8.34e-06	4.06e-06
11	108331951	108331952	AG	-	frameshift_variant	coding	ATM	NM_000051.4	c.7705_7706del	p.Asp2569Ter	Pathogenic/Likely_pathogenic	Ataxia-telangiectasia_syndrome|Hereditary_cancer-predisposing_syndrome	RCV000204947.3|RCV000214581.1	rs864622576	.	.	.	1.65e-05	2.03e-05
11	108332853	108332853	A	-	frameshift_variant	coding	ATM	NM_000051.4	c.7880del	p.Tyr2627LeufsTer4	Pathogenic/Likely_pathogenic	Ataxia-telangiectasia_syndrome	RCV000409111.1	.	.	.	.	.	4.07e-06
11	108335957	108335961	ATAAG	-	frameshift_variant,splice_region_variant	coding	ATM	NM_000051.4	c.8264_8268del	p.Tyr2755CysfsTer12	Pathogenic	not_provided|Ataxia-telangiectasia_syndrome|Hereditary_cancer-predisposing_syndrome	RCV000159623.3|RCV000190640.3|RCV000221664.1	rs730881294	.	.	.	8.42e-06	8.15e-06
11	108347309	108347310	AT	-	frameshift_variant	coding	ATM	NM_000051.4	c.8615_8616del	p.His2872ArgfsTer8	Pathogenic	.	.	.	.	.	.	.	8.16e-06
11	108365103	108365104	TT	-	frameshift_variant	coding	ATM	NM_000051.4	c.8873_8874del	p.Phe2958Ter	Pathogenic	Ataxia-telangiectasia_syndrome	RCV000206073.1	rs864622669	.	.	.	8.27e-06	4.06e-06
11	22625809	22625809	A	C	start_lost	coding	FANCF	NM_022725.4	c.2T>G	p.Met1?	Pathogenic	Fanconi_anemia\x2cFanconi_anemia	RCV000462200.1\x2cRCV000272674.1	rs745495865	.	.	.	8.33e-06	4.1e-06
11	94459463	94459464	TG	-	frameshift_variant	coding	MRE11	NM_005591.4	c.1444_1445del	p.Gln482AlafsTer4	Pathogenic	.	.	.	.	.	.	.	1.22e-05
11	94471572	94471572	A	T	splice_donor_variant	coding	MRE11	NM_005591.4	c.845+2T>A	-	Pathogenic/Likely_pathogenic	Hereditary_cancer-predisposing_syndrome|not_provided	RCV000129209.2|RCV000397709.1	rs587781381	.	.	.	.	4.08e-06
13	102862505	102862506	CT	-	frameshift_variant	coding	ERCC5	NM_000123.4	c.1358_1359del	p.Ser453CysfsTer9	Pathogenic	.	.	.	.	.	.	.	4.07e-06
13	102862505	102862506	CT	-	frameshift_variant	coding	BIVM-ERCC5	NM_001204425.2	c.2720_2721del	p.Ser907CysfsTer9	Pathogenic	.	.	.	.	.	.	.	4.07e-06
13	108209755	108209755	-	GA	frameshift_variant	coding	LIG4	NM_206937.2	c.1512_1513dup	p.Arg505LeufsTer9	Pathogenic	.	.	rs759838407	.	.	.	2.47e-05	1.22e-05
13	108210386	108210390	CATTT	-	frameshift_variant	coding	LIG4	NM_206937.2	c.879_883del	p.Asn294IlefsTer2	Likely_pathogenic	.	.	rs751070095	.	.	.	1.65e-05	1.22e-05
13	32316462	32316462	T	G	start_lost	coding	BRCA2	NM_000059.4	c.2T>G	p.Met1?	Pathogenic	Familial_cancer_of_breast|Hereditary_cancer-predisposing_syndrome\x2cHereditary_breast_and_ovarian_cancer_syndrome|Breast-ovarian_cancer\x2c_familial_2|Hereditary_cancer-predisposing_syndrome	RCV000044101.2|RCV000165930.1\x2cRCV000044102.3|RCV000113010.1|RCV000131870.2	rs80358547	.	.	.	8.34e-06	8.13e-06
13	32319142	32319142	G	T	stop_gained	coding	BRCA2	NM_000059.4	c.133G>T	p.Glu45Ter	Pathogenic	Familial_cancer_of_breast	RCV000043784.2	rs397507581	.	.	.	.	4.06e-06
13	32319154	32319154	G	T	stop_gained	coding	BRCA2	NM_000059.4	c.145G>T	p.Glu49Ter	Pathogenic	not_provided|Breast-ovarian_cancer\x2c_familial_2|Hereditary_cancer-predisposing_syndrome|Hereditary_breast_and_ovarian_cancer_syndrome|Familial_cancer_of_breast	RCV000043811.5|RCV000077257.7|RCV000131868.3|RCV000167820.3|RCV000238910.1	rs80358435	.	.	.	.	4.06e-06
13	32336579	32336579	C	T	stop_gained	coding	BRCA2	NM_000059.4	c.2224C>T	p.Gln742Ter	Pathogenic	Hereditary_cancer-predisposing_syndrome\x2cFamilial_cancer_of_breast|Breast-ovarian_cancer\x2c_familial_2|not_provided	RCV000164550.1\x2cRCV000043958.4|RCV000077273.5|RCV000212220.1	rs80358494	.	.	.	8.25e-06	.
13	32336944	32336944	T	-	frameshift_variant	coding	BRCA2	NM_000059.4	c.2589del	p.Gln864LysfsTer10	Pathogenic	Familial_cancer_of_breast|Breast-ovarian_cancer\x2c_familial_2	RCV000044021.2|RCV000241432.1	rs397507632	.	.	.	8.31e-06	4.49e-06
13	32337092	32337096	GACTT	-	frameshift_variant	coding	BRCA2	NM_000059.4	c.2743_2747del	p.Thr915CysfsTer19	Pathogenic	Breast-ovarian_cancer\x2c_familial_2|Familial_cancer_of_breast	RCV000169607.3|RCV000239268.1	rs786204752	.	.	.	8.28e-06	4.09e-06
13	32337453	32337454	AT	-	frameshift_variant	coding	BRCA2	NM_000059.4	c.3100_3101del	p.Ile1034Ter	Pathogenic/Likely_pathogenic	.	.	.	.	.	.	.	1.23e-05
13	32337618	32337618	-	T	frameshift_variant	coding	BRCA2	NM_000059.4	c.3264dup	p.Gln1089SerfsTer10	Pathogenic	Breast-ovarian_cancer\x2c_familial_2	RCV000257860.1	rs80359380	.	.	.	8.46e-06	2.19e-05
13	32337791	32337791	G	T	stop_gained	coding	BRCA2	NM_000059.4	c.3436G>T	p.Glu1146Ter	Pathogenic	.	.	.	.	.	.	.	4.07e-06
13	32337832	32337832	-	AG	frameshift_variant	coding	BRCA2	NM_000059.4	c.3481_3482dup	p.Asp1161GlufsTer8	Pathogenic	Hereditary_breast_and_ovarian_cancer_syndrome|Breast-ovarian_cancer\x2c_familial_2	RCV000234119.2|RCV000256803.2	.	.	.	.	.	4.07e-06
13	32338515	32338515	-	GGAAG	frameshift_variant	coding	BRCA2	NM_000059.4	c.4160_4161insGGAAG	p.Thr1388GlufsTer24	Pathogenic	.	.	rs765444423	.	.	.	8.3e-06	4.27e-06
13	32338517	32338521	ACTTT	-	frameshift_variant	coding	BRCA2	NM_000059.4	c.4162_4166del	p.Thr1388PhefsTer13	Pathogenic	Breast-ovarian_cancer\x2c_familial_2	RCV000241370.1	rs750704702	.	.	.	8.3e-06	4.27e-06
13	32338680	32338680	C	A	stop_gained	coding	BRCA2	NM_000059.4	c.4325C>A	p.Ser1442Ter	Pathogenic	Hereditary_breast_and_ovarian_cancer_syndrome|Breast-ovarian_cancer\x2c_familial_2\x2cBreast-ovarian_cancer\x2c_familial_2|not_provided	RCV000044395.3|RCV000113295.3\x2cRCV000077728.3|RCV000160186.1	rs80358670	COSM4666038;COSM4666039	1(large_intestine)	.	.	4.22e-06
13	32338982	32338982	A	-	frameshift_variant	coding	BRCA2	NM_000059.4	c.4631del	p.Asn1544ThrfsTer24	Pathogenic	Breast-ovarian_cancer\x2c_familial_2|Hereditary_breast_and_ovarian_cancer_syndrome|Hereditary_cancer-predisposing_syndrome|not_provided|not_specified	RCV000031494.8|RCV000044455.7|RCV000130639.3|RCV000160290.4|RCV000239108.1	rs80359461	COSM1366444;COSM1366443	1(large_intestine)	.	.	4.08e-06
13	32339499	32339502	TGTA	-	frameshift_variant	coding	BRCA2	NM_000059.4	c.5146_5149del	p.Tyr1716LysfsTer8	Pathogenic	Familial_cancer_of_breast|Breast-ovarian_cancer\x2c_familial_2|Hereditary_cancer-predisposing_syndrome|Hereditary_breast_and_ovarian_cancer_syndrome	RCV000044567.3|RCV000113387.3|RCV000214399.1|RCV000456131.1	rs763933639	.	.	.	8.46e-06	4.49e-06
13	32339897	32339897	A	-	frameshift_variant	coding	BRCA2	NM_000059.4	c.5542del	p.Ser1848ValfsTer15	Pathogenic	Hereditary_breast_and_ovarian_cancer_syndrome|Breast-ovarian_cancer\x2c_familial_2|Hereditary_cancer-predisposing_syndrome|not_provided	RCV000044678.3|RCV000077353.5|RCV000130725.2|RCV000218498.2	rs80359519	.	.	.	8.28e-06	4.11e-06
13	32339986	32339986	C	-	frameshift_variant	coding	BRCA2	NM_000059.4	c.5631del	p.Asn1877LysfsTer32	Pathogenic	Breast-ovarian_cancer\x2c_familial_2|Hereditary_cancer-predisposing_syndrome	RCV000031562.4|RCV000166635.2	rs397507357	.	.	.	8.3e-06	4.11e-06
13	32340378	32340378	-	G	frameshift_variant	coding	BRCA2	NM_000059.4	c.6024dup	p.Gln2009AlafsTer9	Pathogenic	Breast-ovarian_cancer\x2c_familial_2|Hereditary_breast_and_ovarian_cancer_syndrome|Hereditary_cancer-predisposing_syndrome|not_provided	RCV000031596.6|RCV000044820.3|RCV000131918.4|RCV000390850.1	rs80359554	.	.	.	.	4.07e-06
13	32340952	32340953	TT	-	frameshift_variant	coding	BRCA2	NM_000059.4	c.6600_6601del	p.Ser2201Ter	Pathogenic	Hereditary_breast_and_ovarian_cancer_syndrome|Breast-ovarian_cancer\x2c_familial_2|Hereditary_cancer-predisposing_syndrome	RCV000044990.4|RCV000113611.3|RCV000162932.2	rs80359607	.	.	.	.	4.16e-06
13	32341078	32341079	AG	-	frameshift_variant	coding	BRCA2	NM_000059.4	c.6724_6725del	p.Asp2242PhefsTer2	Pathogenic	Breast-ovarian_cancer\x2c_familial_2|Familial_cancer_of_breast	RCV000031644.5|RCV000045032.2	rs397507375	.	.	.	.	4.06e-06
13	32354916	32354916	G	T	stop_gained	coding	BRCA2	NM_000059.4	c.7063G>T	p.Glu2355Ter	Pathogenic	Breast-ovarian_cancer\x2c_familial_2	RCV000241131.2	rs200078639	.	.	0.0002	8.26e-06	4.07e-06
13	32356546	32356546	-	C	frameshift_variant	coding	BRCA2	NM_000059.4	c.7556dup	p.Arg2520SerfsTer19	Pathogenic	Breast-ovarian_cancer\x2c_familial_2|Hereditary_cancer-predisposing_syndrome	RCV000076999.4|RCV000215159.1	rs80359660	.	.	.	.	4.07e-06
13	32370447	32370447	G	A	missense_variant	coding	BRCA2	NM_000059.4	c.8377G>A	p.Gly2793Arg	Pathogenic/Likely_pathogenic	Hereditary_breast_and_ovarian_cancer_syndrome|not_provided|Breast-ovarian_cancer\x2c_familial_2|Hereditary_cancer-predisposing_syndrome\x2cBreast-ovarian_cancer\x2c_familial_2	RCV000045499.3|RCV000074556.5|RCV000077437.4|RCV000131353.3\x2cRCV000241165.1	rs80359082	.	.	.	8.24e-06	8.12e-06
13	32376791	32376791	G	A	splice_region_variant,synonymous_variant	coding	BRCA2	NM_000059.4	c.8754G>A	p.Glu2918=	Pathogenic/Likely_pathogenic	Familial_cancer_of_breast|Breast-ovarian_cancer\x2c_familial_2|Hereditary_cancer-predisposing_syndrome	RCV000045618.2|RCV000077451.3|RCV000131042.3	rs80359803	.	.	.	.	4.07e-06
13	32379821	32379825	TATCA	-	frameshift_variant	coding	BRCA2	NM_000059.4	c.9026_9030del	p.Tyr3009SerfsTer7	Pathogenic	Breast-ovarian_cancer\x2c_familial_2|Hereditary_breast_and_ovarian_cancer_syndrome|Hereditary_cancer-predisposing_syndrome|not_provided	RCV000031787.8|RCV000045692.4|RCV000214145.1|RCV000414452.1	rs80359741	.	.	.	.	4.07e-06
13	32380124	32380124	G	-	frameshift_variant	coding	BRCA2	NM_000059.4	c.9235del	p.Val3079PhefsTer4	Pathogenic	Breast-ovarian_cancer\x2c_familial_2|not_provided	RCV000031804.5|RCV000235872.1	rs397507422	.	.	.	8.27e-06	3.26e-05
13	32398200	32398200	T	-	frameshift_variant	coding	BRCA2	NM_000059.4	c.9689del	p.Leu3230TyrfsTer19	Pathogenic	Breast-ovarian_cancer\x2c_familial_2	RCV000241324.1	rs755175776	.	.	.	8.28e-06	4.08e-06
13	32398321	32398321	G	-	frameshift_variant	coding	BRCA2	NM_000059.4	c.9808del	p.Ala3270ProfsTer5	Pathogenic	Breast-ovarian_cancer\x2c_familial_2|Hereditary_breast_and_ovarian_cancer_syndrome|Hereditary_cancer-predisposing_syndrome	RCV000077051.4|RCV000197732.1|RCV000217558.1	rs398122622	.	.	.	.	4.06e-06
13	50927478	50927478	G	-	frameshift_variant,splice_region_variant	coding	RNASEH2B	NM_024570.4	c.136+1del	-	Pathogenic	.	.	rs762857414	.	.	.	8.25e-06	1.22e-05
13	50943372	50943372	C	T	missense_variant	coding	RNASEH2B	NM_024570.4	c.488C>T	p.Thr163Ile	Pathogenic	.	.	rs79310911	.	.	.	.	4.06e-06
14	45196478	45196478	C	T	stop_gained	coding	FANCM	NM_020937.4	c.5647C>T	p.Gln1883Ter	Pathogenic	.	.	.	.	.	.	.	8.13e-06
15	89268509	89268509	T	C	missense_variant	coding	FANCI	NM_001113378.2	c.866T>C	p.Leu289Pro	Pathogenic	.	.	.	.	.	.	.	4.06e-06
15	89306149	89306149	G	-	frameshift_variant	coding	FANCI	NM_001113378.2	c.3493del	p.Asp1165ThrfsTer34	Pathogenic	.	.	rs758597713	.	.	.	8.24e-06	4.87e-05
15	90749563	90749564	AC	-	frameshift_variant	coding	BLM	NM_000057.4	c.298_299del	p.Gln100GlufsTer42	Pathogenic/Likely_pathogenic	Bloom_syndrome	RCV000411055.1	rs745807085	.	.	.	8.25e-06	8.13e-06
15	90769537	90769538	AG	-	frameshift_variant	coding	BLM	NM_000057.4	c.2506_2507del	p.Arg836GlyfsTer18	Pathogenic	Bloom_syndrome	RCV000034897.1	rs367543024	.	.	.	5.77e-05	7.72e-05
15	90809232	90809232	C	T	stop_gained	coding	BLM	NM_000057.4	c.3847C>T	p.Gln1283Ter	Pathogenic	Bloom_syndrome	RCV000034915.1	rs367543031	.	.	.	.	4.06e-06
16	13930832	13930832	A	-	frameshift_variant	coding	ERCC4	NM_005236.3	c.915del	p.Asn308IlefsTer6	Likely_pathogenic	Xeroderma_pigmentosum\x2c_group_F	RCV000350484.1	rs772432152	.	.	.	8.27e-06	4.06e-06
16	2046126	2046126	A	G	splice_donor_variant	coding	NTHL1	NM_002528.7	c.354+2T>C	-	Likely_pathogenic	.	.	.	.	.	.	.	4.08e-06
16	23629742	23629743	AG	-	frameshift_variant	coding	PALB2	NM_024675.4	c.2411_2412del	p.Ser804CysfsTer10	Pathogenic/Likely_pathogenic	Hereditary_cancer-predisposing_syndrome|Familial_cancer_of_breast|not_provided	RCV000218515.1|RCV000229872.1|RCV000236720.1	rs747148023	.	.	.	8.24e-06	1.22e-05
16	23629818	23629818	G	C	stop_gained	coding	PALB2	NM_024675.4	c.2336C>G	p.Ser779Ter	Pathogenic/Likely_pathogenic	Hereditary_cancer-predisposing_syndrome|Familial_cancer_of_breast	RCV000166057.2|RCV000457524.1	rs764509489	.	.	.	8.24e-06	1.22e-05
16	23630230	23630230	T	-	frameshift_variant	coding	PALB2	NM_024675.4	c.1924del	p.Met642CysfsTer18	Pathogenic/Likely_pathogenic	Hereditary_cancer-predisposing_syndrome|not_provided|Familial_cancer_of_breast	RCV000160805.4|RCV000212803.1|RCV000410708.1	rs730881865	.	.	.	8.27e-06	4.06e-06
16	23638116	23638116	A	C	stop_gained	coding	PALB2	NM_024675.4	c.62T>G	p.Leu21Ter	Pathogenic/Likely_pathogenic	.	.	rs769240800	.	.	.	8.24e-06	8.12e-06
16	3582694	3582694	C	T	splice_acceptor_variant	coding	SLX4	NM_032444.4	c.5154-1G>A	-	Likely_pathogenic	.	.	rs761665399	.	.	.	9.32e-06	4.16e-06
16	3596384	3596384	G	A	stop_gained	coding	SLX4	NM_032444.4	c.1693C>T	p.Gln565Ter	Likely_pathogenic	.	.	.	.	.	.	.	4.54e-06
16	3601013	3601013	G	A	stop_gained	coding	SLX4	NM_032444.4	c.1129C>T	p.Gln377Ter	Pathogenic	.	.	.	.	.	.	.	1.63e-05
16	89739170	89739170	G	C	stop_gained	coding	FANCA	NM_000135.4	c.4130C>G	p.Ser1377Ter	Pathogenic	.	.	rs199599393	.	.	0.0002	8.25e-06	4.07e-06
16	89745031	89745031	C	T	stop_gained	coding	FANCA	NM_000135.4	c.3554G>A	p.Trp1185Ter	Pathogenic	.	.	rs770393751	.	.	.	9.34e-06	4.14e-06
16	89758648	89758648	T	-	frameshift_variant	coding	FANCA	NM_000135.4	c.2910del	p.Gly972AlafsTer17	Pathogenic/Likely_pathogenic	.	.	.	.	.	.	.	4.06e-06
16	89767213	89767213	G	C	stop_gained	coding	FANCA	NM_000135.4	c.2529C>G	p.Tyr843Ter	Pathogenic	.	.	.	COSM5967118	1(salivary_gland)	.	.	1.22e-05
16	89767213	89767213	G	T	stop_gained	coding	FANCA	NM_000135.4	c.2529C>A	p.Tyr843Ter	Pathogenic/Likely_pathogenic	.	.	.	.	.	.	.	4.06e-06
16	89778942	89778942	C	T	splice_donor_variant	coding	FANCA	NM_000135.4	c.1776+1G>A	-	Likely_pathogenic	.	.	rs756140957	.	.	.	8.25e-06	8.12e-06
16	89784891	89784891	G	C	stop_gained	coding	FANCA	NM_000135.4	c.1433C>G	p.Ser478Ter	Pathogenic	.	.	.	.	.	.	.	4.06e-06
16	89791538	89791538	T	C	splice_acceptor_variant	coding	FANCA	NM_000135.4	c.1226-2A>G	-	Pathogenic/Likely_pathogenic	.	.	rs773906241	.	.	.	3.32e-05	1.63e-05
16	89805279	89805279	C	G	splice_donor_variant	coding	FANCA	NM_000135.4	c.709+1G>C	-	Likely_pathogenic	.	.	.	.	.	.	.	4.11e-06
16	89814564	89814567	CAGT	-	frameshift_variant	coding	FANCA	NM_000135.4	c.236_239del	p.Asp79ValfsTer15	Pathogenic	.	.	.	.	.	.	.	4.06e-06
16	89814565	89814565	A	-	frameshift_variant	coding	FANCA	NM_000135.4	c.238del	p.Cys80ValfsTer15	Pathogenic	Fanconi_anemia	RCV000204795.1	rs864622187	.	.	.	.	.
17	35119160	35119161	AC	-	frameshift_variant	coding	RAD51D	NM_002878.3	c.94_95del	p.Val32PhefsTer38	Pathogenic/Likely_pathogenic	Hereditary_cancer-predisposing_syndrome|Breast-ovarian_cancer\x2c_familial_4	RCV000166313.2|RCV000469049.1	rs786203137	.	.	.	.	4.06e-06
17	43063890	43063890	C	T	stop_gained	coding	BRCA1	NM_007294.4	c.5136G>A	p.Trp1712Ter	Pathogenic	Hereditary_breast_and_ovarian_cancer_syndrome|Breast-ovarian_cancer\x2c_familial_1|Hereditary_cancer-predisposing_syndrome|Familial_cancer_of_breast	RCV000048806.4|RCV000077600.5|RCV000131830.3|RCV000475804.1	rs80357418	.	.	.	.	4.06e-06
17	43091516	43091516	C	A	stop_gained	coding	BRCA1	NM_007294.4	c.4015G>T	p.Glu1339Ter	Pathogenic	Breast-ovarian_cancer\x2c_familial_1|Familial_cancer_of_breast|Hereditary_cancer-predisposing_syndrome\x2cnot_specified	RCV000031140.5|RCV000048409.2|RCV000162870.1\x2cRCV000159985.1	rs80357021	.	.	.	.	4.07e-06
17	43091597	43091600	TGTT	-	frameshift_variant	coding	BRCA1	NM_007294.4	c.3931_3934del	p.Asn1311ProfsTer6	Pathogenic	Familial_cancer_of_breast|Breast-ovarian_cancer\x2c_familial_1	RCV000048384.2|RCV000112211.3	rs80357864	.	.	.	.	4.07e-06
17	43091670	43091673	CTCA	-	frameshift_variant	coding	BRCA1	NM_007294.4	c.3858_3861del	p.Ser1286ArgfsTer20	Pathogenic	Breast-ovarian_cancer\x2c_familial_1|Hereditary_breast_and_ovarian_cancer_syndrome	RCV000031134.8|RCV000048359.6	rs80357889	.	.	.	.	8.14e-06
17	43091882	43091882	-	T	frameshift_variant	coding	BRCA1	NM_007294.4	c.3648dup	p.Ser1217IlefsTer2	Pathogenic	Breast-ovarian_cancer\x2c_familial_1|Familial_cancer_of_breast|Hereditary_cancer-predisposing_syndrome|Hereditary_breast_and_ovarian_cancer_syndrome	RCV000031116.8|RCV000048270.3|RCV000221757.1|RCV000225763.2	rs80357902	.	.	.	8.24e-06	4.06e-06
17	43091883	43091887	TAAGT	-	frameshift_variant	coding	BRCA1	NM_007294.4	c.3644_3648del	p.Asn1215IlefsTer2	Pathogenic	.	.	.	.	.	.	.	4.06e-06
17	43092302	43092303	CT	-	frameshift_variant	coding	BRCA1	NM_007294.4	c.3228_3229del	p.Gly1077AlafsTer8	Pathogenic	Breast-ovarian_cancer\x2c_familial_1|not_provided|Hereditary_cancer-predisposing_syndrome|Hereditary_breast_and_ovarian_cancer_syndrome|Familial_cancer_of_breast	RCV000031097.9|RCV000048107.6|RCV000162862.2|RCV000225762.2|RCV000473763.1	rs80357635	.	.	.	.	4.08e-06
17	43093234	43093235	CT	-	frameshift_variant	coding	BRCA1	NM_007294.4	c.2296_2297del	p.Ser766Ter	Pathogenic	Breast-ovarian_cancer\x2c_familial_1|Familial_cancer_of_breast|Hereditary_cancer-predisposing_syndrome	RCV000019235.7|RCV000047787.2|RCV000214000.1	rs80357780	.	.	.	.	4.07e-06
17	43094706	43094706	-	CCACATGGCT	frameshift_variant	coding	BRCA1	NM_007294.4	c.815_824dup	p.Thr276AlafsTer14	Pathogenic	.	.	rs387906563	.	.	.	.	4.07e-06
17	43106455	43106455	C	T	splice_donor_variant	coding	BRCA1	NM_007294.4	c.212+1G>A	-	Pathogenic	Hereditary_breast_and_ovarian_cancer_syndrome|Breast-ovarian_cancer\x2c_familial_1|Hereditary_cancer-predisposing_syndrome\x2cFamilial_cancer_of_breast|Breast-ovarian_cancer\x2c_familial_1\x2cBreast-ovarian_cancer\x2c_familial_1|Familial_cancer_of_breast	RCV000047717.3|RCV000112019.1|RCV000218717.1\x2cRCV000047716.2|RCV000112018.1\x2cRCV000031027.4|RCV000047715.2	rs80358042	.	.	.	.	4.09e-06
17	58695191	58695191	T	C	splice_donor_variant	coding	RAD51C	NM_058216.3	c.404+2T>C	-	Pathogenic/Likely_pathogenic	not_provided|Hereditary_cancer-predisposing_syndrome|Fanconi_anemia\x2c_complementation_group_O	RCV000160923.2|RCV000221514.1|RCV000467500.1	rs730881931	.	.	.	.	4.15e-06
17	61684141	61684141	C	T	splice_acceptor_variant	coding	BRIP1	NM_032043.3	c.2906-1G>A	-	Likely_pathogenic	.	.	rs773639563	.	.	.	1.66e-05	8.16e-06
17	61780931	61780932	TT	-	frameshift_variant	coding	BRIP1	NM_032043.3	c.1702_1703del	p.Asn568TrpfsTer9	Pathogenic/Likely_pathogenic	Carcinoma_of_colon	RCV000416663.1	.	.	.	.	.	4.06e-06
17	61784269	61784269	C	G	splice_donor_variant	coding	BRIP1	NM_032043.3	c.1628+1G>C	-	Likely_pathogenic	.	.	.	.	.	.	.	4.07e-06
17	61808466	61808466	C	T	splice_donor_variant	coding	BRIP1	NM_032043.3	c.918+1G>A	-	Pathogenic/Likely_pathogenic	Hereditary_cancer-predisposing_syndrome|not_provided|Familial_cancer_of_breast|Fanconi_anemia\x2c_complementation_group_J	RCV000129793.3|RCV000434292.1|RCV000472419.1|RCV000472419.1	rs587781655	.	.	.	.	1.63e-05
17	61857196	61857196	C	-	frameshift_variant	coding	BRIP1	NM_032043.3	c.241del	p.Glu81LysfsTer20	Pathogenic/Likely_pathogenic	.	.	.	.	.	.	.	4.06e-06
17	7670699	7670699	C	T	missense_variant	coding	TP53	NM_000546.6	c.1010G>A	p.Arg337His	Pathogenic/Likely_pathogenic	Hereditary_cancer-predisposing_syndrome\x2cLi-Fraumeni_syndrome\x2cAdrenocortical_carcinoma\x2c_pediatric|Hereditary_cancer-predisposing_syndrome|Li-Fraumeni_syndrome|Breast_cancer	RCV000132259.2\x2cRCV000154527.1\x2cRCV000013178.23|RCV000128923.3|RCV000197240.4|RCV000413754.1	rs121912664	COSM131485;COSM43882	1(pancreas);5(liver);3(adrenal_gland);1(cervix);1(large_intestine)	.	8.52e-06	8.14e-06
18	22982394	22982394	G	T	splice_donor_variant	coding	RBBP8	NM_002894.3	c.604+1G>T	-	Pathogenic	Seckel_syndrome_2	RCV000118129.1	rs587780432	.	.	.	.	.
20	5117609	5117609	C	G	missense_variant	coding	PCNA	NM_182649.2	c.443G>C	p.Cys148Ser	Likely_pathogenic	.	.	.	.	.	.	.	4.07e-06
22	28689167	28689167	C	A	stop_gained	coding	CHEK2	NM_007194.4	c.1510G>T	p.Glu504Ter	Likely_pathogenic	.	.	.	.	.	.	.	8.73e-06
22	28689212	28689212	C	A	stop_gained	coding	CHEK2	NM_007194.4	c.1465G>T	p.Glu489Ter	Pathogenic	.	.	.	.	.	.	.	4.37e-06
22	28695781	28695781	A	-	frameshift_variant	coding	CHEK2	NM_007194.4	c.1188del	p.Val397PhefsTer17	Pathogenic/Likely_pathogenic	Familial_cancer_of_breast	RCV000234460.2	rs753159426	.	.	.	8.3e-06	4.07e-06
22	28710060	28710060	C	T	splice_acceptor_variant	coding	CHEK2	NM_007194.4	c.793-1G>A	-	Pathogenic/Likely_pathogenic	not_provided|Hereditary_cancer-predisposing_syndrome|Familial_cancer_of_breast	RCV000160429.2|RCV000214915.1|RCV000464029.1	rs730881687	.	.	.	.	1.63e-05
22	28719413	28719413	-	TGAT	frameshift_variant	coding	CHEK2	NM_007194.4	c.661_664dup	p.Met222AsnfsTer24	Pathogenic/Likely_pathogenic	Hereditary_cancer-predisposing_syndrome	RCV000164995.1	rs750616657	.	.	.	3.48e-05	1.8e-05
22	28719461	28719462	AC	-	frameshift_variant	coding	CHEK2	NM_007194.4	c.616_617del	p.Val206ArgfsTer2	Pathogenic	.	.	.	.	.	.	.	4.46e-06
22	28724991	28724992	AG	-	frameshift_variant	coding	CHEK2	NM_007194.4	c.577_578del	p.Leu193LysfsTer4	Pathogenic	.	.	rs775167943	.	.	.	8.25e-06	8.12e-06
Ashkenazi Jewish
2	47799090	47799091	TT	-	frameshift_variant	coding	MSH6	NM_000179.3	c.1108_1109del	p.Leu370ArgfsTer4	Pathogenic/Likely_pathogenic	Lynch_syndrome	RCV000168455.1	rs786204252	.	.	.	.	4.07e-06
2	47801142	47801142	T	A	stop_gained	coding	MSH6	NM_000179.3	c.3159T>A	p.Cys1053Ter	Pathogenic	.	.	.	.	.	.	.	4.14e-06
2	47805709	47805709	T	C	splice_donor_variant	coding	MSH6	NM_000179.3	c.3646+2T>C	-	Likely_pathogenic	.	.	.	.	.	.	.	4.06e-06
2	47806630	47806630	-	TCAG	frameshift_variant	coding	MSH6	NM_000179.3	c.3984_3987dup	p.Leu1330ValfsTer12	Pathogenic	Lynch_syndrome|Hereditary_cancer-predisposing_syndrome|not_provided	RCV000074964.3|RCV000131963.5|RCV000202165.1	rs751033488	.	.	.	2.57e-05	1.66e-05
3	14158132	14158133	CT	-	frameshift_variant	coding	XPC	NM_004628.5	c.1750_1751del	p.Arg584ValfsTer15	Likely_pathogenic	.	.	rs752030576	.	.	.	1.66e-05	8.12e-06
5	132588836	132588836	A	T	stop_gained	coding	RAD50	NM_005732.4	c.1201A>T	p.Arg401Ter	Pathogenic	.	.	rs199867309	.	.	.	1.67e-05	8.13e-06
5	60890913	60890913	G	T	stop_gained	coding	ERCC8	NM_000082.4	c.1017C>A	p.Cys339Ter	Pathogenic	.	.	rs753663016	.	.	.	2.49e-05	2.44e-05
5	80656533	80656533	T	G	splice_donor_variant	coding	MSH3	NM_002439.5	c.358+2T>G	-	Likely_pathogenic	.	.	.	.	.	.	.	1.22e-05
8	89947835	89947835	T	A	stop_gained	coding	NBN	NM_002485.5	c.1903A>T	p.Lys635Ter	Pathogenic/Likely_pathogenic	Hereditary_cancer-predisposing_syndrome|not_provided|Microcephaly\x2c_normal_intelligence_and_immunodeficiency	RCV000131755.3|RCV000219708.2|RCV000227700.2	rs587782545	.	.	.	5.07e-05	3.95e-05
8	89982751	89982752	AC	-	frameshift_variant	coding	NBN	NM_002485.5	c.141_142del	p.Leu48AsnfsTer3	Pathogenic/Likely_pathogenic	.	.	rs750375741	.	.	.	8.24e-06	4.06e-06
11	108325329	108325330	CT	-	frameshift_variant	coding	ATM	NM_000051.4	c.6596_6597del	p.Ser2199Ter	Likely_pathogenic	.	.	rs747057367	.	.	.	8.28e-06	4.07e-06
15	90769437	90769437	-	T	frameshift_variant,splice_region_variant	coding	BLM	NM_000057.4	c.2407dup	p.Trp803LeufsTer4	Pathogenic	Bloom_syndrome	RCV000035004.2	rs367543012	.	.	.	.	4.06e-06
15	90804299	90804300	AA	-	frameshift_variant	coding	BLM	NM_000057.4	c.3692_3693del	p.Lys1231SerfsTer11	Pathogenic/Likely_pathogenic	.	.	.	.	.	.	.	8.12e-06
16	89739290	89739290	C	T	splice_acceptor_variant	coding	FANCA	NM_000135.4	c.4011-1G>A	-	Pathogenic	not_provided	RCV000270448.1	rs761988162	.	.	.	8.29e-06	4.06e-06
17	7675157	7675157	G	A	missense_variant	coding	TP53	NM_000546.6	c.455C>T	p.Pro152Leu	Pathogenic	Hereditary_cancer-predisposing_syndrome|Li-Fraumeni_syndrome	RCV000132156.6|RCV000168122.2	rs587782705	COSM3717667;COSM129856;COSM129858;COSM10790;COSM1645282;COSM129859;COSM129857	4(vulva);1(breast);1(stomach);4(haematopoietic_and_lymphoid_tissue);3(soft_tissue);8(urinary_tract);1(pancreas);3(liver);10(oesophagus);2(adrenal_gland);1(skin);3(prostate);1(lung);8(upper_aerodigestive_tract);19(large_intestine);17(central_nervous_system)	.	3.3e-05	8.13e-06
22	28687974	28687974	G	A	stop_gained	coding	CHEK2	NM_007194.4	c.1555C>T	p.Arg519Ter	Pathogenic/Likely_pathogenic	Hereditary_cancer-predisposing_syndrome|Breast_and_colorectal_cancer\x2c_susceptibility_to|not_provided|Familial_cancer_of_breast	RCV000116005.5|RCV000210124.1|RCV000212474.2|RCV000471222.1	rs200432447	.	.	.	.	4.38e-06
Finnish
1	45331240	45331240	G	T	missense_variant	coding	MUTYH	NM_001048174.2	c.1334C>A	p.Ala445Asp	Pathogenic	MYH-associated_polyposis	RCV000033940.2	rs200844166	.	.	.	3.3e-05	2.84e-05
2	214780662	214780662	G	C	stop_gained	coding	BARD1	NM_000465.4	c.1212C>G	p.Tyr404Ter	Pathogenic	Hereditary_cancer-predisposing_syndrome|Familial_cancer_of_breast|not_provided	RCV000132107.3|RCV000195626.1|RCV000413940.1	rs587782681	.	.	.	.	4.07e-06
2	214781360	214781360	-	T	frameshift_variant	coding	BARD1	NM_000465.4	c.513dup	p.Asp172ArgfsTer10	Pathogenic	.	.	rs746325928	.	.	.	1.65e-05	1.63e-05
3	37004414	37004414	T	G	missense_variant	coding	MLH1	NM_000249.4	c.320T>G	p.Ile107Arg	Pathogenic	Lynch_syndrome|not_provided	RCV000075654.2|RCV000160517.1	rs63750507	.	.	.	.	4.06e-06
3	37008903	37008903	C	G	splice_region_variant,synonymous_variant	coding	MLH1	NM_000249.4	c.543C>G	p.Gly181=	Likely_pathogenic	.	.	.	.	.	.	.	4.06e-06
5	80670214	80670214	G	T	stop_gained	coding	MSH3	NM_002439.5	c.697G>T	p.Glu233Ter	Pathogenic	.	.	rs756632960	.	.	.	1.65e-05	3.25e-05
5	80679061	80679062	AG	-	frameshift_variant	coding	MSH3	NM_002439.5	c.1310_1311del	p.Glu437GlyfsTer10	Pathogenic	.	.	rs757194485	.	.	.	1.65e-05	2.03e-05
5	80775738	80775741	TGAT	-	frameshift_variant	coding	MSH3	NM_002439.5	c.2300_2303del	p.Asp767GlyfsTer2	Pathogenic	.	.	.	.	.	.	.	4.08e-06
7	5987265	5987265	G	-	frameshift_variant	coding	PMS2	NM_000535.7	c.1500del	p.Val501TrpfsTer94	Pathogenic	Lynch_syndrome	RCV000210104.1	rs759151952	.	.	.	1.65e-05	8.13e-06
8	89943338	89943338	G	-	frameshift_variant	coding	NBN	NM_002485.5	c.2099del	p.Pro700HisfsTer9	Pathogenic	.	.	.	.	.	.	.	4.06e-06
9	95114679	95114680	CA	-	frameshift_variant	coding	FANCC	NM_000136.3	c.1103_1104del	p.Leu368GlnfsTer5	Likely_pathogenic	Fanconi_anemia\x2c_complementation_group_C	RCV000410408.1	.	.	.	.	.	4.06e-06
11	108235669	108235669	G	A	splice_acceptor_variant	coding	ATM	NM_000051.4	c.332-1G>A	-	Likely_pathogenic	Hereditary_cancer-predisposing_syndrome	RCV000217634.1	rs747855862	.	.	.	8.72e-06	4.08e-06
11	108331498	108331498	G	C	missense_variant	coding	ATM	NM_000051.4	c.7570G>C	p.Ala2524Pro	Likely_pathogenic	Hereditary_cancer-predisposing_syndrome	RCV000167357.1	rs769142993	.	.	.	2.48e-05	2.84e-05
13	32333167	32333167	G	A	stop_gained	coding	BRCA2	NM_000059.4	c.1689G>A	p.Trp563Ter	Pathogenic	Hereditary_breast_and_ovarian_cancer_syndrome|Breast-ovarian_cancer\x2c_familial_2	RCV000043863.3|RCV000112960.3	rs80358456	.	.	.	.	4.07e-06
13	32380005	32380005	A	G	splice_acceptor_variant	coding	BRCA2	NM_000059.4	c.9118-2A>G	-	Pathogenic	Breast-ovarian_cancer\x2c_familial_2\x2cFamilial_cancer_of_breast|Breast-ovarian_cancer\x2c_familial_2|not_provided\x2cBreast-ovarian_cancer\x2c_familial_2	RCV000258415.1\x2cRCV000045727.4|RCV000077460.3|RCV000212285.2\x2cRCV000258235.1	rs81002862	.	.	.	3.38e-05	3.26e-05
14	45137239	45137239	C	T	stop_gained,splice_region_variant	coding	FANCM	NM_020937.4	c.679C>T	p.Gln227Ter	Pathogenic	.	.	.	.	.	.	.	4.1e-06
17	43082403	43082403	C	T	splice_donor_variant	coding	BRCA1	NM_007294.4	c.4357+1G>A	-	Pathogenic	Familial_cancer_of_breast|Breast-ovarian_cancer\x2c_familial_1|Hereditary_cancer-predisposing_syndrome\x2cFamilial_cancer_of_breast|Breast-ovarian_cancer\x2c_familial_1|Hereditary_cancer-predisposing_syndrome\x2cBreast-ovarian_cancer\x2c_familial_1|not_provided|Hereditary_cancer-predisposing_syndrome|Hereditary_breast_and_ovarian_cancer_syndrome	RCV000048534.2|RCV000112325.1|RCV000222812.1\x2cRCV000048533.2|RCV000112324.1|RCV000215639.1\x2cRCV000031165.7|RCV000048532.6|RCV000131879.2|RCV000167804.2	rs80358027	.	.	0.0002	8.25e-06	4.07e-06
17	7674893	7674893	C	T	missense_variant	coding	TP53	NM_000546.6	c.638G>A	p.Arg213Gln	Pathogenic	Adrenocortical_Carcinoma|Uterine_Carcinosarcoma|Malignant_melanoma_of_skin|Neoplasm_of_brain|Colorectal_Neoplasms|Hepatocellular_carcinoma|Glioblastoma|Pancreatic_adenocarcinoma|Renal_cell_carcinoma|Neoplasm_of_breast|Oesophageal_carcinoma|Transitional_cell_carcinoma_of_the_bladder|Squamous_cell_carcinoma_of_the_head_and_neck|Adenocarcinoma_of_stomach|Squamous_cell_carcinoma_of_lung|Squamous_cell…	RCV000417467.1|RCV000418608.1|RCV000418814.1|RCV000421737.1|RCV000422458.1|RCV000422684.1|RCV000427240.1|RCV000427500.1|RCV000428488.1|RCV000428624.1|RCV000428841.1|RCV000432738.1|RCV000433789.1|RCV000435132.1|RCV000435387.1|RCV000437481.1|RCV000438469.1|RCV000439587.1|RCV000439979.1|RCV000443648.1|RCV000444469.1|RCV000445195.1\x2cRCV000220461.1|RCV000418520.1|RCV000419521.1|RCV000420213.1|RCV000…	rs587778720	COSM3403265;COSM1726594;COSM10735;COSM131466;COSM131469;COSM131468;COSM131467	1(vulva);1(breast);3(stomach);8(haematopoietic_and_lymphoid_tissue);1(kidney);4(urinary_tract);8(liver);3(oesophagus);2(skin);1(upper_aerodigestive_tract);5(large_intestine);1(central_nervous_system);1(biliary_tract);2(endometrium)	.	8.26e-06	4.06e-06
22	28695187	28695187	G	A	stop_gained	coding	CHEK2	NM_007194.4	c.1315C>T	p.Gln439Ter	Pathogenic/Likely_pathogenic	Hereditary_cancer-predisposing_syndrome|not_provided	RCV000217777.1|RCV000255686.1	.	.	.	.	.	4.07e-06
Non-Finnish European (Bulgarian)
2	47463155	47463155	G	A	splice_donor_variant	coding	MSH2	NM_000251.3	c.1510+1G>A	-	Likely_pathogenic	.	.	.	.	.	.	.	4.06e-06
5	132603385	132603397	AAGAACGACATAG	-	frameshift_variant	coding	RAD50	NM_005732.4	c.2299_2311del	p.Asp767LysfsTer8	Pathogenic	.	.	.	.	.	.	.	4.07e-06
8	47961665	47961665	C	T	upstream_gene_variant	noncoding	PRKDC	NM_006904.7	-	-	Likely_pathogenic	.	.	.	.	.	.	.	4.11e-06
8	47961665	47961665	C	T	stop_gained	coding	MCM4	NM_182746.3	c.220C>T	p.Gln74Ter	Likely_pathogenic	.	.	.	.	.	.	.	4.11e-06
9	95126582	95126582	C	G	splice_acceptor_variant	coding	FANCC	NM_000136.3	c.844-1G>C	-	Pathogenic/Likely_pathogenic	Fanconi_anemia\x2c_complementation_group_C|not_provided|Fanconi_anemia	RCV000169449.1|RCV000224795.2|RCV000462508.1	rs774209201	.	.	.	8.28e-06	8.12e-06
10	49461431	49461431	G	A	stop_gained	coding	ERCC6	NM_000124.4	c.3904C>T	p.Gln1302Ter	Pathogenic	Cockayne_syndrome_B	RCV000170389.1	rs786205174	.	.	.	.	4.07e-06
11	108315898	108315898	C	T	stop_gained	coding	ATM	NM_000051.4	c.6082C>T	p.Gln2028Ter	Pathogenic	Hereditary_cancer-predisposing_syndrome	RCV000213485.1	.	.	.	.	.	4.06e-06
11	108343372	108343372	G	A	splice_donor_variant	coding	ATM	NM_000051.4	c.8418+1G>A	-	Likely_pathogenic	Ataxia-telangiectasia_syndrome	RCV000409887.1	rs766533795	.	.	.	8.25e-06	4.07e-06
13	32398193	32398193	A	-	frameshift_variant	coding	BRCA2	NM_000059.4	c.9682del	p.Ser3228ValfsTer21	Pathogenic	Breast-ovarian_cancer\x2c_familial_2	RCV000077047.4	rs398122618	.	.	.	.	4.08e-06
14	45189069	45189073	AAAAG	-	frameshift_variant	coding	FANCM	NM_020937.4	c.5048_5052del	p.Lys1683ArgfsTer3	Pathogenic	.	.	.	.	.	.	.	4.07e-06
16	89814528	89814528	G	T	stop_gained	coding	FANCA	NM_000135.4	c.275C>A	p.Ser92Ter	Pathogenic	.	.	.	.	.	.	.	4.06e-06
19	45353293	45353293	A	-	frameshift_variant	coding	ERCC2	NM_000400.4	c.1707del	p.Ile569MetfsTer140	Likely_pathogenic	.	.	rs767672172	.	.	.	1.68e-05	8.13e-06
Non-Finnish European (Estonian)
11	94435901	94435901	T	C	splice_acceptor_variant	coding	MRE11	NM_005591.4	c.1927-2A>G	-	Likely_pathogenic	Hereditary_cancer-predisposing_syndrome	RCV000130102.4	rs587781822	.	.	.	.	.
17	35107017	35107017	G	A	stop_gained	coding	RAD51D	NM_002878.3	c.451C>T	p.Gln151Ter	Pathogenic/Likely_pathogenic	Hereditary_cancer-predisposing_syndrome|Breast-ovarian_cancer\x2c_familial_4	RCV000129970.3|RCV000409676.1	rs587781756	.	.	.	.	4.06e-06
Non-Finnish European (North-Western European)
1	45332252	45332252	T	C	missense_variant	coding	MUTYH	NM_001048174.2	c.763A>G	p.Met255Val	Pathogenic/Likely_pathogenic	Hereditary_cancer-predisposing_syndrome	RCV000216419.1	.	.	.	.	.	4.07e-06
1	45332678	45332678	C	A	stop_gained	coding	MUTYH	NM_001048174.2	c.502G>T	p.Glu168Ter	Pathogenic	MYH-associated_polyposis	RCV000475342.1	rs745921592	.	.	.	8.24e-06	4.06e-06
1	45333168	45333168	A	T	missense_variant,splice_region_variant	coding	MUTYH	NM_001048174.2	c.307T>A	p.Trp103Arg	Pathogenic/Likely_pathogenic	Hereditary_cancer-predisposing_syndrome|not_provided	RCV000160751.4|RCV000212700.1	rs730881832	.	.	.	8.24e-06	4.06e-06
2	127271348	127271348	G	A	stop_gained	coding	ERCC3	NM_000122.2	c.1933C>T	p.Arg645Ter	Likely_pathogenic	.	.	.	.	.	.	.	4.06e-06
2	127289349	127289350	AA	-	frameshift_variant	coding	ERCC3	NM_000122.2	c.809_810del	p.Phe270Ter	Pathogenic	.	.	rs866379139	.	.	.	.	2.03e-05
2	214728861	214728862	TG	-	frameshift_variant	coding	BARD1	NM_000465.4	c.2148_2149del	p.Ile717GlnfsTer12	Pathogenic/Likely_pathogenic	Hereditary_cancer-predisposing_syndrome	RCV000167280.1	rs786203811	.	.	.	.	4.06e-06
2	214728960	214728960	T	A	stop_gained	coding	BARD1	NM_000465.4	c.2050A>T	p.Lys684Ter	Pathogenic/Likely_pathogenic	.	.	.	.	.	.	.	.
2	214730507	214730507	C	T	stop_gained,splice_region_variant	coding	BARD1	NM_000465.4	c.1905G>A	p.Trp635Ter	Pathogenic	.	.	rs773223671	.	.	.	.	4.07e-06
2	214781013	214781014	CT	-	frameshift_variant	coding	BARD1	NM_000465.4	c.860_861del	p.Glu287ValfsTer5	Pathogenic	Hereditary_cancer-predisposing_syndrome	RCV000164367.1	rs786201868	.	.	.	.	4.09e-06
2	214781378	214781378	G	A	stop_gained	coding	BARD1	NM_000465.4	c.496C>T	p.Gln166Ter	Pathogenic	Hereditary_cancer-predisposing_syndrome|not_provided	RCV000165343.2|RCV000437177.1	rs786202500	.	.	.	.	4.07e-06
2	214792363	214792363	G	A	stop_gained	coding	BARD1	NM_000465.4	c.298C>T	p.Gln100Ter	Pathogenic	Hereditary_cancer-predisposing_syndrome|Familial_cancer_of_breast	RCV000164438.1|RCV000459220.1	rs786201912	.	.	.	.	4.07e-06
2	214797059	214797059	A	G	splice_donor_variant	coding	BARD1	NM_000465.4	c.215+2T>C	-	Likely_pathogenic	.	.	.	.	.	.	.	.
2	47412470	47412471	AA	-	frameshift_variant	coding	MSH2	NM_000251.3	c.704_705del	p.Lys235ArgfsTer20	Pathogenic	Lynch_syndrome	RCV000076686.2	rs281864944	.	.	.	.	4.06e-06
2	47414421	47414421	A	T	splice_region_variant,intron_variant	coding	MSH2	NM_000251.3	c.942+3A>T	-	Pathogenic	Colorectal_cancer\x2c_hereditary\x2c_nonpolyposis\x2c_type_1|Lynch_syndrome_I|Lynch_syndrome|Hereditary_cancer-predisposing_syndrome|not_provided	RCV000001833.2|RCV000001844.6|RCV000030256.5|RCV000115549.6|RCV000201997.2	rs193922376	COSM26123	2(large_intestine);1(endometrium)	.	.	0.0113
2	47795903	47795903	C	G	stop_gained	coding	MSH6	NM_000179.3	c.467C>G	p.Ser156Ter	Pathogenic	Lynch_syndrome|Lynch_syndrome_I|not_provided	RCV000075003.2|RCV000172813.1|RCV000201956.3	rs63749873	.	.	.	.	4.07e-06
2	47799112	47799116	AAGAG	-	frameshift_variant	coding	MSH6	NM_000179.3	c.1135_1139del	p.Arg379Ter	Pathogenic	Lynch_syndrome|Hereditary_cancer-predisposing_syndrome|not_provided	RCV000074635.2|RCV000129834.4|RCV000202120.2	rs777907133	.	.	.	8.24e-06	4.07e-06
2	47799402	47799402	-	GT	frameshift_variant	coding	MSH6	NM_000179.3	c.1421_1422dup	p.Gln475CysfsTer7	Pathogenic	Lynch_syndrome|Hereditary_cancer-predisposing_syndrome	RCV000074655.2|RCV000222326.1	rs63750854	.	.	.	.	4.07e-06
2	47799917	47799917	A	-	frameshift_variant	coding	MSH6	NM_000179.3	c.1937del	p.Lys646SerfsTer2	Pathogenic	.	.	.	.	.	.	.	4.07e-06
2	47800177	47800177	C	T	stop_gained	coding	MSH6	NM_000179.3	c.2194C>T	p.Arg732Ter	Pathogenic	Lynch_syndrome|Hereditary_nonpolyposis_colorectal_cancer_type_5\x2cLynch_syndrome|Hereditary_cancer-predisposing_syndrome|not_provided	RCV000197601.1|RCV000412439.1\x2cRCV000074726.3|RCV000132226.5|RCV000212661.2	rs63751127	COSM5862587	1(NS)	.	.	4.07e-06
2	47803577	47803577	-	AATG	frameshift_variant	coding	MSH6	NM_000179.3	c.3332_3335dup	p.Asp1112GlufsTer2	Pathogenic	Hereditary_cancer-predisposing_syndrome|not_provided|Tumor_susceptibility_linked_to_germline_BAP1_mutations|Lynch_syndrome	RCV000131783.2|RCV000202177.1|RCV000221780.1|RCV000233414.2	rs863225407	.	.	.	8.24e-06	4.06e-06
2	47806297	47806326	CTCACTACCATTCATTAGTAGAAGATTATT	-	inframe_deletion	coding	MSH6	NM_000179.3	c.3744_3773del	p.His1248_Ser1257del	Pathogenic/Likely_pathogenic	not_specified	RCV000202077.2	rs863225412	.	.	.	.	4.07e-06
2	58204171	58204171	A	-	frameshift_variant	coding	FANCL	NM_018062.4	c.430del	p.Ser144LeufsTer6	Pathogenic	Fanconi_anemia\x2c_complementation_group_L	RCV000191023.2	.	.	.	.	.	1.22e-05
3	10032957	10032960	AGTC	-	frameshift_variant	coding	FANCD2	NM_001018115.3	c.192_195del	p.Ser64ArgfsTer4	Pathogenic	.	.	.	.	.	.	.	4.06e-06
3	10048008	10048008	T	C	missense_variant	coding	FANCD2	NM_001018115.3	c.1370T>C	p.Leu457Pro	Pathogenic	.	.	.	.	.	.	.	4.06e-06
3	10067310	10067310	C	G	stop_gained	coding	FANCD2	NM_001018115.3	c.2487C>G	p.Tyr829Ter	Pathogenic/Likely_pathogenic	.	.	.	.	.	.	.	4.09e-06
3	10073307	10073307	A	-	frameshift_variant	coding	FANCD2	NM_001018115.3	c.2661del	p.Glu888ArgfsTer16	Pathogenic	.	.	rs762544228	.	.	.	.	4.06e-06
3	10092206	10092206	G	A	stop_gained	coding	FANCD2	NM_001018115.3	c.3803G>A	p.Trp1268Ter	Pathogenic	.	.	rs757499508	.	.	.	8.24e-06	4.06e-06
3	14148847	14148848	CT	-	frameshift_variant	coding	XPC	NM_004628.5	c.2216_2217del	p.Glu739GlyfsTer59	Pathogenic	.	.	.	.	.	.	.	.
3	14156334	14156334	C	T	splice_donor_variant	coding	XPC	NM_004628.5	c.2033+1G>A	-	Likely_pathogenic	.	.	rs764480429	.	.	.	8.34e-06	.
3	14165587	14165587	T	C	splice_acceptor_variant	coding	XPC	NM_004628.5	c.622-2A>G	-	Likely_pathogenic	.	.	.	.	.	.	.	4.09e-06
3	14168347	14168348	TC	-	frameshift_variant	coding	XPC	NM_004628.5	c.445_446del	p.Glu149LysfsTer19	Pathogenic	.	.	.	.	.	.	.	8.13e-06
3	14170507	14170508	CT	-	frameshift_variant	coding	XPC	NM_004628.5	c.342_343del	p.Ala116TyrfsTer4	Pathogenic	.	.	.	.	.	.	.	4.07e-06
3	142497116	142497116	C	A	missense_variant	coding	ATR	NM_001184.4	c.5635G>T	p.Asp1879Tyr	Pathogenic	Seckel_syndrome_1	RCV000034827.3	rs387907327	.	.	.	.	4.07e-06
3	37011819	37011819	G	C	splice_acceptor_variant	coding	MLH1	NM_000249.4	c.546-1G>C	-	Likely_pathogenic	Lynch_syndrome	RCV000075754.2	.	.	.	.	.	4.07e-06
3	37011857	37011857	A	-	frameshift_variant	coding	MLH1	NM_000249.4	c.588del	p.Lys196AsnfsTer6	Pathogenic	Lynch_syndrome	RCV000075776.2	rs63751653	COSM1422583	1(large_intestine)	.	.	4.06e-06
3	37017508	37017508	C	A	missense_variant,splice_region_variant	coding	MLH1	NM_000249.4	c.793C>A	p.Arg265Ser	Pathogenic	Lynch_syndrome|not_provided\x2cLynch_syndrome_II|not_provided|Lynch_syndrome|Hereditary_cancer-predisposing_syndrome	RCV000075871.2|RCV000202126.1\x2cRCV000022502.23|RCV000034802.2|RCV000075872.2|RCV000220712.1	rs63751194	.	.	.	.	4.06e-06
3	37047632	37047634	GAA	-	inframe_deletion	coding	MLH1	NM_000249.4	c.1852_1854del	p.Lys618del	Pathogenic	Turcot_syndrome|Lynch_syndrome|Hereditary_cancer-predisposing_syndrome|Lynch_syndrome_II|not_provided	RCV000018609.27|RCV000075383.4|RCV000129328.4|RCV000192399.2|RCV000202279.2	rs63751247	COSM1422600	1(large_intestine)	.	.	4.06e-06
3	37048515	37048515	A	G	splice_acceptor_variant	coding	MLH1	NM_000249.4	c.1897-2A>G	-	Likely_pathogenic	Lynch_syndrome	RCV000075411.2	rs267607871	.	.	.	.	4.06e-06
5	132604886	132604886	G	T	stop_gained	coding	RAD50	NM_005732.4	c.2605G>T	p.Glu869Ter	Pathogenic	.	.	rs764449224	.	.	.	8.45e-06	4.07e-06
5	132608629	132608629	G	-	frameshift_variant	coding	RAD50	NM_005732.4	c.2734del	p.Val912Ter	Pathogenic	.	.	.	.	.	.	.	4.56e-06
5	132609296	132609300	AACTT	-	frameshift_variant	coding	RAD50	NM_005732.4	c.2938_2942del	p.Leu980Ter	Pathogenic	.	.	.	.	.	.	.	4.08e-06
5	132609340	132609344	AAAGA	-	frameshift_variant	coding	RAD50	NM_005732.4	c.2985_2989del	p.Glu995AspfsTer3	Pathogenic	.	.	.	.	.	.	.	8.14e-06
5	132616021	132616021	C	T	stop_gained	coding	RAD50	NM_005732.4	c.3055C>T	p.Gln1019Ter	Pathogenic	.	.	.	.	.	.	.	4.07e-06
5	132638215	132638226	GGACAAAAGGCA	-	splice_donor_variant,coding_sequence_variant,intron_variant	coding	RAD50	NM_005732.4	c.3612_3618+5del	-	Likely_pathogenic	.	.	.	.	.	.	.	4.06e-06
5	132642195	132642195	C	A	stop_gained	coding	RAD50	NM_005732.4	c.3770C>A	p.Ser1257Ter	Likely_pathogenic	.	.	.	.	.	.	.	4.06e-06
5	132642204	132642204	G	-	frameshift_variant	coding	RAD50	NM_005732.4	c.3779del	p.Arg1260LeufsTer7	Pathogenic/Likely_pathogenic	Hereditary_cancer-predisposing_syndrome	RCV000164979.2	rs786202259	.	.	.	.	4.06e-06
5	60887494	60887494	G	T	stop_gained	coding	ERCC8	NM_000082.4	c.1068C>A	p.Cys356Ter	Pathogenic	.	.	rs141898557	.	.	.	1.65e-05	8.12e-06
5	80670307	80670307	G	T	stop_gained,splice_region_variant	coding	MSH3	NM_002439.5	c.790G>T	p.Glu264Ter	Pathogenic	.	.	rs766997264	.	.	.	8.28e-06	4.06e-06
5	80675041	80675041	-	A	frameshift_variant	coding	MSH3	NM_002439.5	c.1087dup	p.Thr363AsnfsTer11	Pathogenic	.	.	.	.	.	.	.	4.06e-06
5	80761545	80761545	G	A	splice_acceptor_variant	coding	MSH3	NM_002439.5	c.1764-1G>A	-	Likely_pathogenic	.	.	rs367544716	.	.	.	1.65e-05	8.13e-06
5	80813592	80813593	AG	-	frameshift_variant	coding	MSH3	NM_002439.5	c.2670_2671del	p.Arg890SerfsTer57	Pathogenic	.	.	.	.	.	.	.	4.06e-06
6	111405476	111405476	T	A	missense_variant	coding	REV3L	NM_001372078.1	c.559A>T	p.Arg187Trp	Likely_pathogenic	Carcinoma_of_colon	RCV000416681.1	.	.	.	.	.	4.44e-06
7	5986891	5986891	A	-	frameshift_variant	coding	PMS2	NM_000535.7	c.1874del	p.Leu625Ter	Pathogenic	Hereditary_cancer-predisposing_syndrome|Lynch_syndrome|not_provided	RCV000166215.1|RCV000229520.2|RCV000413904.1	rs786203073	.	.	.	.	4.06e-06
7	5986933	5986933	-	T	frameshift_variant	coding	PMS2	NM_000535.7	c.1831dup	p.Ile611AsnfsTer2	Pathogenic	Lynch_syndrome|Hereditary_cancer-predisposing_syndrome|not_specified|Lynch_syndrome_I|not_provided	RCV000076830.3|RCV000115666.4|RCV000121837.1|RCV000144653.1|RCV000258972.2	rs63750250	.	.	.	8.24e-06	1.62e-05
7	5986987	5986987	T	-	frameshift_variant	coding	PMS2	NM_000535.7	c.1778del	p.Lys593SerfsTer2	Pathogenic/Likely_pathogenic	not_provided	RCV000217805.1	rs766389591	.	.	.	8.24e-06	4.06e-06
7	5995564	5995564	A	-	frameshift_variant	coding	PMS2	NM_000535.7	c.873del	p.Phe291LeufsTer16	Pathogenic/Likely_pathogenic	.	.	.	.	.	.	.	4.06e-06
8	89937024	89937024	A	C	splice_donor_variant	coding	NBN	NM_002485.5	c.2234+2T>G	-	Likely_pathogenic	Hereditary_cancer-predisposing_syndrome	RCV000164379.1	rs142301194	.	.	.	8.69e-06	8.18e-06
8	89946172	89946172	-	ATAATCAT	frameshift_variant	coding	NBN	NM_002485.5	c.2030_2037dup	p.Gly680MetfsTer6	Pathogenic	.	.	.	.	.	.	.	4.07e-06
8	89953348	89953348	G	A	stop_gained	coding	NBN	NM_002485.5	c.1741C>T	p.Gln581Ter	Pathogenic	.	.	.	.	.	.	.	4.07e-06
8	89953437	89953437	-	T	frameshift_variant	coding	NBN	NM_002485.5	c.1651dup	p.Arg551LysfsTer5	Pathogenic	Hereditary_cancer-predisposing_syndrome|Microcephaly\x2c_normal_intelligence_and_immunodeficiency	RCV000221563.1|RCV000472929.1	rs766044684	.	.	.	8.24e-06	8.13e-06
8	89958856	89958856	T	C	splice_acceptor_variant	coding	NBN	NM_002485.5	c.995-2A>G	-	Likely_pathogenic	Hereditary_cancer-predisposing_syndrome|Microcephaly\x2c_normal_intelligence_and_immunodeficiency	RCV000223218.1|RCV000231563.2	.	.	.	.	.	4.06e-06
8	89970451	89970452	AC	-	frameshift_variant	coding	NBN	NM_002485.5	c.808_809del	p.Val270CysfsTer2	Pathogenic	Hereditary_cancer-predisposing_syndrome|Microcephaly\x2c_normal_intelligence_and_immunodeficiency	RCV000165330.1|RCV000205978.1	rs786202490	.	.	.	.	4.06e-06
8	89981389	89981389	A	-	frameshift_variant	coding	NBN	NM_002485.5	c.306del	p.Phe102LeufsTer7	Pathogenic/Likely_pathogenic	Hereditary_cancer-predisposing_syndrome	RCV000129019.2	rs587781305	.	.	.	.	4.06e-06
8	89981483	89981483	-	TC	frameshift_variant	coding	NBN	NM_002485.5	c.211_212insGA	p.Asn71ArgfsTer22	Pathogenic	Microcephaly\x2c_normal_intelligence_and_immunodeficiency	RCV000200419.2	rs762664474	.	.	.	8.25e-06	.
8	89982770	89982770	G	-	frameshift_variant	coding	NBN	NM_002485.5	c.123del	p.Ser42AlafsTer7	Pathogenic	Hereditary_cancer-predisposing_syndrome|Microcephaly\x2c_normal_intelligence_and_immunodeficiency	RCV000130227.2|RCV000466522.1	rs587781891	.	.	.	.	4.06e-06
9	35074205	35074205	-	G	frameshift_variant	coding	FANCG	NM_004629.2	c.1771dup	p.Leu591ProfsTer14	Pathogenic	.	.	.	.	.	.	.	4.06e-06
9	35074970	35074970	G	-	frameshift_variant	coding	FANCG	NM_004629.2	c.1593del	p.Ala533ProfsTer26	Pathogenic	.	.	rs761519737	.	.	.	8.24e-06	8.12e-06
9	35077290	35077290	A	-	frameshift_variant	coding	FANCG	NM_004629.2	c.620del	p.Leu207ProfsTer2	Pathogenic	.	.	rs753727461	.	.	.	8.24e-06	4.06e-06
9	35079150	35079150	C	T	splice_donor_variant	coding	FANCG	NM_004629.2	c.175+1G>A	-	Pathogenic	.	.	.	.	.	.	.	8.61e-06
9	35079169	35079169	-	C	frameshift_variant	coding	FANCG	NM_004629.2	c.156dup	p.Leu53AlafsTer4	Pathogenic	Fanconi_anemia	RCV000198686.3	rs863224506	.	.	.	.	1.28e-05
9	95101756	95101756	G	T	stop_gained	coding	FANCC	NM_000136.3	c.1628C>A	p.Ser543Ter	Pathogenic/Likely_pathogenic	Fanconi_anemia\x2c_complementation_group_C	RCV000409524.1	rs867319477	.	.	.	.	8.13e-06
9	95111489	95111489	-	A	frameshift_variant	coding	FANCC	NM_000136.3	c.1302dup	p.Gly435TrpfsTer83	Pathogenic/Likely_pathogenic	Hereditary_cancer-predisposing_syndrome|Fanconi_anemia	RCV000160468.1|RCV000203768.2	rs730881709	.	.	.	.	4.07e-06
9	95171110	95171111	TC	-	frameshift_variant	coding	FANCC	NM_000136.3	c.489_490del	p.Asn164SerfsTer3	Pathogenic	Fanconi_anemia	RCV000198724.1	rs863224470	.	.	.	.	4.07e-06
10	49524421	49524421	T	A	stop_gained	coding	ERCC6	NM_000124.4	c.1009A>T	p.Lys337Ter	Pathogenic/Likely_pathogenic	.	.	.	.	.	.	.	.
10	68432271	68432271	A	G	missense_variant	coding	DNA2	NM_001080449.3	c.1808T>C	p.Phe603Ser	Likely_pathogenic	.	.	rs778309817	.	.	.	.	1.65e-05
11	108227626	108227626	T	C	start_lost	coding	ATM	NM_000051.4	c.2T>C	p.Met1?	Pathogenic/Likely_pathogenic	Hereditary_cancer-predisposing_syndrome|Ataxia-telangiectasia_syndrome	RCV000166992.2|RCV000168377.6	rs786203606	.	.	.	.	4.06e-06
11	108227637	108227637	-	T	frameshift_variant	coding	ATM	NM_000051.4	c.15dup	p.Asn6Ter	Pathogenic	Hereditary_cancer-predisposing_syndrome	RCV000213282.1	.	.	.	.	.	4.06e-06
11	108229226	108229226	A	-	frameshift_variant	coding	ATM	NM_000051.4	c.237del	p.Lys79AsnfsTer37	Pathogenic/Likely_pathogenic	not_provided	RCV000159632.2	rs730881303	.	.	.	.	4.07e-06
11	108235815	108235819	ATCTC	-	frameshift_variant	coding	ATM	NM_000051.4	c.478_482del	p.Ser160AlafsTer23	Pathogenic/Likely_pathogenic	Ataxia-telangiectasia_syndrome|Hereditary_cancer-predisposing_syndrome	RCV000122852.2|RCV000164941.2	rs786202225	.	.	.	.	.
11	108244913	108244913	T	-	frameshift_variant	coding	ATM	NM_000051.4	c.790del	p.Tyr264IlefsTer12	Pathogenic	Hereditary_cancer-predisposing_syndrome|Ataxia-telangiectasia_syndrome|not_provided	RCV000130373.3|RCV000233840.2|RCV000235917.2	rs774609577	.	.	.	8.25e-06	8.14e-06
11	108244947	108244947	T	-	frameshift_variant	coding	ATM	NM_000051.4	c.824del	p.Leu275Ter	Pathogenic	Ataxia-telangiectasia_syndrome|Hereditary_cancer-predisposing_syndrome	RCV000205636.1|RCV000221322.1	rs864622389	.	.	.	.	8.14e-06
11	108246963	108246963	G	T	splice_acceptor_variant	coding	ATM	NM_000051.4	c.902-1G>T	-	Pathogenic	.	.	.	COSM1315823	1(haematopoietic_and_lymphoid_tissue)	.	.	4.07e-06
11	108247052	108247052	A	-	frameshift_variant	coding	ATM	NM_000051.4	c.992del	p.Lys331SerfsTer15	Pathogenic	.	.	.	.	.	.	.	4.07e-06
11	108250834	108250834	C	T	stop_gained	coding	ATM	NM_000051.4	c.1369C>T	p.Arg457Ter	Pathogenic	Ataxia-telangiectasia_syndrome\x2cAtaxia-telangiectasia_syndrome	RCV000229490.1\x2cRCV000205849.2	rs749036865	COSM5341381;COSM5341382	3(large_intestine)	.	.	4.06e-06
11	108252914	108252914	T	G	splice_donor_variant	coding	ATM	NM_000051.4	c.1898+2T>G	-	Pathogenic/Likely_pathogenic	Hereditary_cancer-predisposing_syndrome|not_provided|Ataxia-telangiectasia_syndrome	RCV000130662.2|RCV000235311.2|RCV000461282.1	rs587782124	.	.	.	.	4.09e-06
11	108256291	108256291	-	C	frameshift_variant	coding	ATM	NM_000051.4	c.2201_2202insC	p.Ile735AsnfsTer3	Pathogenic	.	.	.	.	.	.	.	4.07e-06
11	108267210	108267210	-	A	frameshift_variant	coding	ATM	NM_000051.4	c.2508dup	p.Ser837IlefsTer5	Pathogenic	.	.	rs770396940	.	.	.	8.27e-06	4.06e-06
11	108267344	108267344	T	C	splice_donor_variant	coding	ATM	NM_000051.4	c.2638+2T>C	-	Pathogenic/Likely_pathogenic	Hereditary_cancer-predisposing_syndrome|not_provided|Ataxia-telangiectasia_syndrome	RCV000115162.7|RCV000211986.2|RCV000477335.1	rs587779826	.	.	.	.	4.06e-06
11	108268464	108268464	T	G	stop_gained	coding	ATM	NM_000051.4	c.2693T>G	p.Leu898Ter	Pathogenic	.	.	.	.	.	.	.	4.06e-06
11	108279578	108279578	C	G	stop_gained	coding	ATM	NM_000051.4	c.3372C>G	p.Tyr1124Ter	Pathogenic/Likely_pathogenic	Hereditary_cancer-predisposing_syndrome|Ataxia-telangiectasia_syndrome|not_provided	RCV000115176.5|RCV000169463.3|RCV000211999.1	rs587779833	.	.	.	.	4.07e-06
11	108289737	108289737	G	-	frameshift_variant	coding	ATM	NM_000051.4	c.4373del	p.Gly1458GlufsTer15	Pathogenic	Hereditary_cancer-predisposing_syndrome|not_provided|Ataxia-telangiectasia_syndrome	RCV000129787.4|RCV000254632.1|RCV000474596.1	rs587781653	.	.	.	.	4.07e-06
11	108301760	108301760	C	-	frameshift_variant	coding	ATM	NM_000051.4	c.5290del	p.Leu1764TyrfsTer12	Pathogenic/Likely_pathogenic	Hereditary_cancer-predisposing_syndrome|Ataxia-telangiectasia_syndrome|not_provided	RCV000115210.5|RCV000169483.3|RCV000235105.1	rs587779846	COSM21933	1(haematopoietic_and_lymphoid_tissue)	.	8.25e-06	8.13e-06
11	108307928	108307928	-	A	frameshift_variant	coding	ATM	NM_000051.4	c.5712dup	p.Ser1905IlefsTer25	Pathogenic/Likely_pathogenic	Hereditary_cancer-predisposing_syndrome|Ataxia-telangiectasia_syndrome|not_provided	RCV000129923.5|RCV000169006.1|RCV000212031.2	rs587781730	.	.	.	.	8.13e-06
11	108316114	108316114	G	A	splice_donor_variant	coding	ATM	NM_000051.4	c.6198+1G>A	-	Pathogenic/Likely_pathogenic	Hereditary_cancer-predisposing_syndrome|Hereditary_breast_and_ovarian_cancer_syndrome	RCV000222023.1|RCV000416815.1	rs778031266	COSM5733946;COSM5733947	1(pancreas)	.	8.43e-06	4.07e-06
11	108320009	108320009	-	TT	frameshift_variant	coding	ATM	NM_000051.4	c.6404_6405insTT	p.Arg2136Ter	Pathogenic/Likely_pathogenic	Hereditary_cancer-predisposing_syndrome	RCV000131770.2	rs864622649	.	.	.	8.25e-06	4.09e-06
11	108327643	108327643	A	C	splice_acceptor_variant	coding	ATM	NM_000051.4	c.6976-2A>C	-	Pathogenic/Likely_pathogenic	Hereditary_cancer-predisposing_syndrome|not_provided|Ataxia-telangiectasia_syndrome	RCV000131437.6|RCV000212053.2|RCV000228133.2	rs587782403	.	.	.	.	4.07e-06
11	108327665	108327665	-	A	frameshift_variant	coding	ATM	NM_000051.4	c.6997dup	p.Thr2333AsnfsTer40	Pathogenic/Likely_pathogenic	Hereditary_cancer-predisposing_syndrome|Ataxia-telangiectasia_syndrome|not_provided	RCV000129007.4|RCV000205392.2|RCV000236518.2	rs775539486	COSM4615844;COSM4615845	1(large_intestine)	.	.	8.14e-06
11	108329027	108329027	G	T	stop_gained	coding	ATM	NM_000051.4	c.7096G>T	p.Glu2366Ter	Pathogenic/Likely_pathogenic	Hereditary_cancer-predisposing_syndrome|Ataxia-telangiectasia_syndrome	RCV000129830.3|RCV000169152.1	rs587781672	COSM4951186;COSM4951185	2(liver)	.	.	4.06e-06
11	108331559	108331559	T	C	splice_donor_variant	coding	ATM	NM_000051.4	c.7629+2T>C	-	Pathogenic/Likely_pathogenic	Hereditary_cancer-predisposing_syndrome|not_provided	RCV000166196.2|RCV000236019.1	rs786203059	.	.	.	.	4.11e-06
11	108335844	108335844	G	A	splice_acceptor_variant	coding	ATM	NM_000051.4	c.8152-1G>A	-	Pathogenic/Likely_pathogenic	.	.	.	.	.	.	.	4.07e-06
11	108345873	108345873	T	A	stop_gained	coding	ATM	NM_000051.4	c.8549T>A	p.Leu2850Ter	Pathogenic/Likely_pathogenic	Hereditary_cancer-predisposing_syndrome	RCV000215215.1	.	.	.	.	.	4.07e-06
11	108354855	108354856	CT	-	frameshift_variant	coding	ATM	NM_000051.4	c.8833_8834del	p.Leu2945ValfsTer10	Pathogenic	Hereditary_cancer-predisposing_syndrome	RCV000166157.1	rs786203030	.	.	.	.	4.06e-06
11	22625121	22625121	A	-	frameshift_variant	coding	FANCF	NM_022725.4	c.690del	p.Gly231GlufsTer7	Likely_pathogenic	.	.	rs747622521	.	.	.	8.38e-06	8.22e-06
11	94447231	94447231	G	A	stop_gained	coding	MRE11	NM_005591.4	c.1771C>T	p.Gln591Ter	Pathogenic	.	.	.	.	.	.	.	4.07e-06
11	94447362	94447369	CTCATAAG	-	frameshift_variant	coding	MRE11	NM_005591.4	c.1633_1640del	p.Leu545TyrfsTer9	Pathogenic	Hereditary_cancer-predisposing_syndrome	RCV000218839.1	.	.	.	.	.	4.07e-06
11	94464202	94464202	-	G	frameshift_variant	coding	MRE11	NM_005591.4	c.1135dup	p.Leu379ProfsTer4	Pathogenic	Hereditary_cancer-predisposing_syndrome	RCV000165739.2	rs786202764	.	.	.	.	4.06e-06
11	94464211	94464226	AAAGGTTCAAAACCTC	-	frameshift_variant	coding	MRE11	NM_005591.4	c.1112_1127del	p.Gly371AlafsTer14	Pathogenic	.	.	.	.	.	.	.	4.06e-06
11	94486068	94486068	A	C	stop_gained	coding	MRE11	NM_005591.4	c.170T>G	p.Leu57Ter	Pathogenic	.	.	.	.	.	.	.	4.07e-06
12	132672595	132672595	G	C	intron_variant	noncoding	POLE	NM_006231.4	c.1686+32C>G	-	Pathogenic	.	.	rs762985435	.	.	.	1.67e-05	2.47e-05
13	102853837	102853841	AAGAC	-	frameshift_variant	coding	ERCC5	NM_000123.4	c.348_352del	p.Arg116SerfsTer12	Pathogenic	.	.	.	.	.	.	.	4.06e-06
13	102853837	102853841	AAGAC	-	frameshift_variant	coding	BIVM-ERCC5	NM_001204425.2	c.1710_1714del	p.Arg570SerfsTer12	Pathogenic	.	.	.	.	.	.	.	4.06e-06
13	108209514	108209518	TCTTA	-	frameshift_variant	coding	LIG4	NM_206937.2	c.1751_1755del	p.Ile584ArgfsTer2	Pathogenic	Lig4_syndrome	RCV000328813.1	rs770128720	.	.	.	8.24e-06	8.12e-06
13	32316529	32316529	T	C	splice_donor_variant	coding	BRCA2	NM_000059.4	c.67+2T>C	-	Pathogenic	Familial_cancer_of_breast|Breast-ovarian_cancer\x2c_familial_2\x2cHereditary_breast_and_ovarian_cancer_syndrome|Breast-ovarian_cancer\x2c_familial_2	RCV000045023.2|RCV000113080.1\x2cRCV000045024.3|RCV000113081.1	rs81002885	.	.	.	.	4.07e-06
13	32325074	32325074	A	G	splice_acceptor_variant	coding	BRCA2	NM_000059.4	c.317-2A>G	-	Likely_pathogenic	.	.	.	.	.	.	.	4.08e-06
13	32329441	32329441	A	G	splice_acceptor_variant	coding	BRCA2	NM_000059.4	c.632-2A>G	-	Pathogenic	Hereditary_breast_and_ovarian_cancer_syndrome\x2cFamilial_cancer_of_breast|not_provided|Breast-ovarian_cancer\x2c_familial_2	RCV000462608.1\x2cRCV000044908.2|RCV000220032.1|RCV000258386.1	rs397507842	COSM95697	1(lung)	.	.	4.19e-06
13	32332465	32332465	-	A	frameshift_variant	coding	BRCA2	NM_000059.4	c.994dup	p.Ile332AsnfsTer4	Pathogenic	Familial_cancer_of_breast\x2cFamilial_cancer_of_breast|Breast-ovarian_cancer\x2c_familial_2	RCV000045922.2\x2cRCV000045924.2|RCV000241048.2	rs778050506	.	.	.	8.32e-06	4.44e-06
13	32332667	32332667	-	TTAG	frameshift_variant	coding	BRCA2	NM_000059.4	c.1189_1190insTTAG	p.Gln397LeufsTer25	Pathogenic	.	.	rs397515635	.	.	.	.	4.07e-06
13	32333229	32333233	AAAAG	-	frameshift_variant	coding	BRCA2	NM_000059.4	c.1755_1759del	p.Lys585AsnfsTer3	Pathogenic	Breast-ovarian_cancer\x2c_familial_2|Hereditary_breast_and_ovarian_cancer_syndrome|Hereditary_cancer-predisposing_syndrome|not_provided	RCV000031335.7|RCV000074514.7|RCV000131055.4|RCV000212215.2	rs80359302	COSM5346809;COSM5346810	1(pancreas)	.	.	4.08e-06
13	32333272	32333276	ATCTT	-	frameshift_variant	coding	BRCA2	NM_000059.4	c.1796_1800del	p.Ser599Ter	Pathogenic	Breast-ovarian_cancer\x2c_familial_2|not_provided|Hereditary_cancer-predisposing_syndrome|Hereditary_breast_and_ovarian_cancer_syndrome	RCV000031337.8|RCV000043887.6|RCV000129987.3|RCV000168232.4	rs276174814	.	.	.	.	4.18e-06
13	32336684	32336684	-	A	frameshift_variant	coding	BRCA2	NM_000059.4	c.2330dup	p.Asp777GlufsTer11	Pathogenic	Malignant_tumor_of_prostate|Breast-ovarian_cancer\x2c_familial_2|not_provided|Hereditary_cancer-predisposing_syndrome|Hereditary_breast_and_ovarian_cancer_syndrome	RCV000009928.2|RCV000077683.5|RCV000160270.2|RCV000163933.2|RCV000206474.2	rs80359328	.	.	.	.	4.07e-06
13	32337458	32337458	G	T	stop_gained	coding	BRCA2	NM_000059.4	c.3103G>T	p.Glu1035Ter	Pathogenic	Hereditary_breast_and_ovarian_cancer_syndrome|Breast-ovarian_cancer\x2c_familial_2|Hereditary_cancer-predisposing_syndrome|not_provided	RCV000044119.6|RCV000077292.5|RCV000131104.3|RCV000212224.2	rs80358556	.	.	.	.	4.09e-06
13	32337854	32337855	AT	-	frameshift_variant	coding	BRCA2	NM_000059.4	c.3500_3501del	p.Ile1167AsnfsTer16	Pathogenic	Familial_cancer_of_breast|Breast-ovarian_cancer\x2c_familial_2|Hereditary_cancer-predisposing_syndrome	RCV000044209.2|RCV000113186.3|RCV000221119.1	rs80359387	.	.	.	.	4.07e-06
13	32338058	32338058	-	A	frameshift_variant	coding	BRCA2	NM_000059.4	c.3708dup	p.Ala1237SerfsTer6	Pathogenic	Breast-ovarian_cancer\x2c_familial_2|not_provided	RCV000077713.4|RCV000160278.3	rs398122769	.	.	.	.	4.11e-06
13	32338140	32338140	C	G	stop_gained	coding	BRCA2	NM_000059.4	c.3785C>G	p.Ser1262Ter	Pathogenic	Hereditary_breast_and_ovarian_cancer_syndrome|Breast-ovarian_cancer\x2c_familial_2|Hereditary_cancer-predisposing_syndrome	RCV000044266.3|RCV000113219.3|RCV000129108.3	rs80358620	.	.	.	8.65e-06	4.2e-06
13	32338765	32338768	AAGA	-	frameshift_variant	coding	BRCA2	NM_000059.4	c.4415_4418del	p.Lys1472ThrfsTer6	Pathogenic	Breast-ovarian_cancer\x2c_familial_2|Hereditary_breast_and_ovarian_cancer_syndrome|not_provided	RCV000031483.6|RCV000044410.4|RCV000213169.1	rs748716604	.	.	.	8.38e-06	4.1e-06
13	32338828	32338831	GAAA	-	frameshift_variant	coding	BRCA2	NM_000059.4	c.4478_4481del	p.Glu1493ValfsTer10	Pathogenic	not_provided|Breast-ovarian_cancer\x2c_familial_2|Hereditary_cancer-predisposing_syndrome|Hereditary_breast_and_ovarian_cancer_syndrome	RCV000044421.6|RCV000077327.9|RCV000131081.2|RCV000195401.3	rs80359455	.	.	.	.	1.63e-05
13	32338981	32338981	-	A	frameshift_variant	coding	BRCA2	NM_000059.4	c.4631dup	p.Asn1544LysfsTer4	Pathogenic	Breast-ovarian_cancer\x2c_familial_2|Hereditary_breast_and_ovarian_cancer_syndrome|Hereditary_cancer-predisposing_syndrome|not_provided	RCV000031493.6|RCV000044456.3|RCV000132322.3|RCV000388617.1	rs80359460	.	.	.	8.3e-06	4.08e-06
13	32339158	32339158	-	A	frameshift_variant	coding	BRCA2	NM_000059.4	c.4808dup	p.Asn1603LysfsTer6	Pathogenic	Familial_cancer_of_breast|Breast-ovarian_cancer\x2c_familial_2|not_provided	RCV000044497.2|RCV000113345.2|RCV000283062.1	rs80359466	.	.	.	.	8.15e-06
13	32339214	32339214	T	G	stop_gained	coding	BRCA2	NM_000059.4	c.4859T>G	p.Leu1620Ter	Pathogenic	Familial_cancer_of_breast|Breast-ovarian_cancer\x2c_familial_2	RCV000044509.2|RCV000113353.3	rs80358710	.	.	.	.	4.08e-06
13	32339229	32339230	AA	-	frameshift_variant	coding	BRCA2	NM_000059.4	c.4876_4877del	p.Asn1626SerfsTer12	Pathogenic	Breast-ovarian_cancer\x2c_familial_2|Hereditary_breast_and_ovarian_cancer_syndrome|Hereditary_cancer-predisposing_syndrome|not_provided	RCV000031510.9|RCV000044510.6|RCV000131079.3|RCV000160293.3	rs80359470	.	.	.	.	8.16e-06
13	32339641	32339642	TC	-	frameshift_variant	coding	BRCA2	NM_000059.4	c.5290_5291del	p.Ser1764LysfsTer3	Pathogenic	Breast-ovarian_cancer\x2c_familial_2|Hereditary_breast_and_ovarian_cancer_syndrome|Hereditary_cancer-predisposing_syndrome	RCV000031537.6|RCV000044629.4|RCV000215243.1	rs80359503	.	.	.	.	4.08e-06
13	32339973	32339976	TAAT	-	frameshift_variant	coding	BRCA2	NM_000059.4	c.5621_5624del	p.Ile1874ArgfsTer34	Pathogenic	Breast-ovarian_cancer\x2c_familial_2|Hereditary_cancer-predisposing_syndrome|not_provided|Hereditary_breast_and_ovarian_cancer_syndrome	RCV000031561.7|RCV000131115.3|RCV000223208.2|RCV000416547.2	rs80359526	.	.	.	.	4.12e-06
13	32340037	32340037	C	G	stop_gained	coding	BRCA2	NM_000059.4	c.5682C>G	p.Tyr1894Ter	Pathogenic	Breast-ovarian_cancer\x2c_familial_2|Hereditary_cancer-predisposing_syndrome\x2cBreast-ovarian_cancer\x2c_familial_2|Hereditary_breast_and_ovarian_cancer_syndrome|Hereditary_cancer-predisposing_syndrome|Ovarian_cancer|not_provided\x2cHereditary_breast_and_ovarian_cancer_syndrome|Hereditary_cancer-predisposing_syndrome|not_specified	RCV000113461.3|RCV000131119.3\x2cRCV000031570.9|RCV000044719.7|RCV000131121.3|RCV000148424.1|RCV000160095.4\x2cRCV000122918.3|RCV000163780.1|RCV000419269.1	rs41293497	.	.	.	.	4.08e-06
13	32340137	32340137	G	T	stop_gained	coding	BRCA2	NM_000059.4	c.5782G>T	p.Glu1928Ter	Pathogenic	Hereditary_breast_and_ovarian_cancer_syndrome|Breast-ovarian_cancer\x2c_familial_2|Tumor_susceptibility_linked_to_germline_BAP1_mutations|not_specified\x2cBreast-ovarian_cancer\x2c_familial_2|Hereditary_breast_and_ovarian_cancer_syndrome	RCV000044753.5|RCV000077360.5|RCV000164827.2|RCV000294025.1\x2cRCV000031577.7|RCV000044754.3	rs56253082	.	.	.	.	.
13	32340212	32340212	G	T	stop_gained	coding	BRCA2	NM_000059.4	c.5857G>T	p.Glu1953Ter	Pathogenic	not_provided|Breast-ovarian_cancer\x2c_familial_2|Hereditary_cancer-predisposing_syndrome|Hereditary_breast_and_ovarian_cancer_syndrome|BRCA2-Related_Disorders	RCV000044775.6|RCV000077363.7|RCV000131117.4|RCV000195356.5|RCV000313209.1	rs80358814	.	.	.	8.26e-06	1.22e-05
13	32341109	32341110	TC	-	frameshift_variant	coding	BRCA2	NM_000059.4	c.6757_6758del	p.Leu2253PhefsTer7	Pathogenic	Hereditary_breast_and_ovarian_cancer_syndrome|Breast-ovarian_cancer\x2c_familial_2|Hereditary_cancer-predisposing_syndrome	RCV000045041.3|RCV000113638.3|RCV000162933.2	rs80359623	.	.	.	.	4.06e-06
13	32355290	32355290	T	A	splice_donor_variant	coding	BRCA2	NM_000059.4	c.7435+2T>A	-	Likely_pathogenic	.	.	.	.	.	.	.	4.08e-06
13	32357881	32357881	G	A	stop_gained	coding	BRCA2	NM_000059.4	c.7757G>A	p.Trp2586Ter	Pathogenic	Hereditary_breast_and_ovarian_cancer_syndrome|Breast-ovarian_cancer\x2c_familial_2|Hereditary_cancer-predisposing_syndrome|not_provided	RCV000045302.5|RCV000077410.5|RCV000131087.3|RCV000215688.2	rs80359003	.	.	.	.	8.12e-06
13	32362650	32362650	A	T	stop_gained	coding	BRCA2	NM_000059.4	c.7933A>T	p.Arg2645Ter	Pathogenic	Hereditary_cancer-predisposing_syndrome\x2cBreast-ovarian_cancer\x2c_familial_2	RCV000222813.1\x2cRCV000257376.2	.	.	.	.	.	4.06e-06
13	32363178	32363178	G	C	splice_acceptor_variant	coding	BRCA2	NM_000059.4	c.7977-1G>C	-	Pathogenic	Breast-ovarian_cancer\x2c_familial_2\x2cBreast-ovarian_cancer\x2c_familial_2|Hereditary_breast_and_ovarian_cancer_syndrome|Hereditary_cancer-predisposing_syndrome\x2cBreast-ovarian_cancer\x2c_familial_2|Hereditary_breast_and_ovarian_cancer_syndrome	RCV000258445.1\x2cRCV000031714.5|RCV000045368.5|RCV000162588.2\x2cRCV000113850.1|RCV000197791.1	rs81002874	.	.	.	.	4.09e-06
13	32363445	32363445	G	A	missense_variant	coding	BRCA2	NM_000059.4	c.8243G>A	p.Gly2748Asp	Pathogenic	Hereditary_breast_and_ovarian_cancer_syndrome|Breast-ovarian_cancer\x2c_familial_2|Hereditary_cancer-predisposing_syndrome	RCV000045460.3|RCV000113895.2|RCV000216216.1	rs80359071	.	.	.	.	8.2e-06
13	32379850	32379851	TA	-	frameshift_variant	coding	BRCA2	NM_000059.4	c.9054_9055del	p.Ser3018ArgfsTer3	Pathogenic	Familial_cancer_of_breast|Breast-ovarian_cancer\x2c_familial_2	RCV000045697.2|RCV000114036.3	rs80359743	.	.	.	.	4.08e-06
13	32379913	32379913	G	A	splice_region_variant,synonymous_variant	coding	BRCA2	NM_000059.4	c.9117G>A	p.Pro3039=	Pathogenic	Breast-ovarian_cancer\x2c_familial_2|Hereditary_breast_and_ovarian_cancer_syndrome|not_provided|Hereditary_cancer-predisposing_syndrome\x2cBreast-ovarian_cancer\x2c_familial_2	RCV000031798.5|RCV000045725.6|RCV000074560.7|RCV000131039.3\x2cRCV000258500.1	rs28897756	.	.	.	.	4.11e-06
13	32394717	32394717	C	G	missense_variant	coding	BRCA2	NM_000059.4	c.9285C>G	p.Asp3095Glu	Pathogenic/Likely_pathogenic	Breast-ovarian_cancer\x2c_familial_2\x2cHereditary_breast_and_ovarian_cancer_syndrome|Breast-ovarian_cancer\x2c_familial_2|Hereditary_cancer-predisposing_syndrome|not_provided\x2cHereditary_cancer-predisposing_syndrome|Hereditary_breast_and_ovarian_cancer_syndrome|Breast_cancer|not_specified	RCV000239130.1\x2cRCV000045779.4|RCV000077467.4|RCV000223197.1|RCV000236007.2\x2cRCV000164250.2|RCV000206162.2|RCV000240721.1|RCV000430642.1	rs80359198	.	.	.	.	4.07e-06
13	32394864	32394865	TG	-	frameshift_variant	coding	BRCA2	NM_000059.4	c.9435_9436del	p.Ser3147CysfsTer2	Pathogenic	Breast-ovarian_cancer\x2c_familial_2|Familial_cancer_of_breast|Hereditary_cancer-predisposing_syndrome|Hereditary_breast_and_ovarian_cancer_syndrome|Breast-ovarian_cancer\x2c_familial_1|not_provided	RCV000031823.6|RCV000074563.5|RCV000131046.3|RCV000205868.1|RCV000210147.1|RCV000235145.2	rs869312761	.	.	.	.	4.06e-06
13	32396896	32396896	A	C	splice_acceptor_variant	coding	BRCA2	NM_000059.4	c.9502-2A>C	-	Pathogenic/Likely_pathogenic	Familial_cancer_of_breast|Breast-ovarian_cancer\x2c_familial_2|Hereditary_cancer-predisposing_syndrome	RCV000045844.2|RCV000114124.1|RCV000131049.3	rs81002868	.	.	.	.	4.07e-06
13	32398179	32398179	T	-	frameshift_variant	coding	BRCA2	NM_000059.4	c.9666del	p.Cys3222TrpfsTer27	Pathogenic	Familial_cancer_of_breast|Breast-ovarian_cancer\x2c_familial_2|Hereditary_cancer-predisposing_syndrome	RCV000045883.2|RCV000114150.3|RCV000130019.3	rs80359772	.	.	.	8.33e-06	4.1e-06
13	32398184	32398184	-	A	frameshift_variant	coding	BRCA2	NM_000059.4	c.9672dup	p.Tyr3225IlefsTer30	Pathogenic	Fanconi_anemia\x2c_complementation_group_D1|Breast-ovarian_cancer\x2c_familial_2|Hereditary_cancer-predisposing_syndrome|Hereditary_breast_and_ovarian_cancer_syndrome|not_provided	RCV000009922.3|RCV000114151.3|RCV000130631.3|RCV000197712.1|RCV000372727.1	rs80359773	.	.	.	.	4.09e-06
13	50943395	50943395	G	A	splice_donor_variant	coding	RNASEH2B	NM_024570.4	c.510+1G>A	-	Pathogenic	.	.	rs77301371	.	.	.	.	4.07e-06
14	45167040	45167040	C	T	stop_gained	coding	FANCM	NM_020937.4	c.1879C>T	p.Arg627Ter	Pathogenic	.	.	rs374626826	.	.	.	8.26e-06	8.13e-06
15	90749479	90749480	TT	-	frameshift_variant	coding	BLM	NM_000057.4	c.213_214del	p.Ser72LeufsTer3	Pathogenic	.	.	.	.	.	.	.	4.06e-06
15	90754932	90754933	TG	-	frameshift_variant	coding	BLM	NM_000057.4	c.1083_1084del	p.Cys361Ter	Pathogenic/Likely_pathogenic	Bloom_syndrome	RCV000412101.1	.	.	.	.	.	4.08e-06
15	90763050	90763050	-	G	frameshift_variant	coding	BLM	NM_000057.4	c.1968dup	p.Lys657GlufsTer5	Pathogenic	.	.	rs772785079	.	.	.	8.25e-06	8.13e-06
15	90765413	90765421	ATGTAAGTT	-	splice_donor_variant,coding_sequence_variant,intron_variant	coding	BLM	NM_000057.4	c.2193+1_2193+9del	-	Likely_pathogenic	.	.	.	.	.	.	.	4.07e-06
15	90766966	90766966	-	AAAT	frameshift_variant	coding	BLM	NM_000057.4	c.2250_2251insAAAT	p.Leu751LysfsTer25	Pathogenic/Likely_pathogenic	Bloom_syndrome	RCV000169119.2	rs786204471	.	.	.	.	8.15e-06
15	90769570	90769570	A	-	frameshift_variant	coding	BLM	NM_000057.4	c.2539del	p.Ile847PhefsTer9	Pathogenic	.	.	rs770751979	.	.	.	8.3e-06	4.07e-06
15	90804334	90804334	-	A	frameshift_variant	coding	BLM	NM_000057.4	c.3727dup	p.Thr1243AsnfsTer14	Pathogenic	Bloom_syndrome	RCV000034914.1	rs367543021	.	.	.	.	4.06e-06
16	2044746	2044746	G	A	stop_gained	coding	NTHL1	NM_002528.7	c.409C>T	p.Gln137Ter	Pathogenic	.	.	rs758667255	.	.	.	.	4.1e-06
16	2044789	2044789	G	T	stop_gained	coding	NTHL1	NM_002528.7	c.366C>A	p.Tyr122Ter	Pathogenic	.	.	rs371328106	.	.	.	1.32e-05	1.3e-05
16	2044795	2044795	-	CGTA	frameshift_variant	coding	NTHL1	NM_002528.7	c.356_359dup	p.Arg121ThrfsTer42	Pathogenic	.	.	rs759955745	.	.	.	1.34e-05	4.35e-06
16	2046317	2046318	TC	-	frameshift_variant	coding	NTHL1	NM_002528.7	c.164_165del	p.Arg55ThrfsTer6	Pathogenic	.	.	.	.	.	.	.	4.07e-06
16	23603471	23603471	G	T	stop_gained	coding	PALB2	NM_024675.4	c.3549C>A	p.Tyr1183Ter	Pathogenic	Fanconi_anemia\x2c_complementation_group_N|Breast_cancer\x2c_susceptibility_to|Familial_cancer_of_breast|Pancreatic_cancer_3|not_specified|Hereditary_cancer-predisposing_syndrome|not_provided\x2cHereditary_cancer-predisposing_syndrome|Familial_cancer_of_breast|not_provided	RCV000001304.2|RCV000001305.2|RCV000114634.6|RCV000114635.1|RCV000121742.1|RCV000129158.7|RCV000212830.2\x2cRCV000116108.8|RCV000200012.3|RCV000212831.2	rs118203998	.	.	.	.	4.06e-06
16	23607890	23607890	G	C	stop_gained	coding	PALB2	NM_024675.4	c.3324C>G	p.Tyr1108Ter	Pathogenic	.	.	.	.	.	.	.	4.06e-06
16	23623033	23623033	-	T	frameshift_variant	coding	PALB2	NM_024675.4	c.2931dup	p.Val978SerfsTer2	Pathogenic	Hereditary_cancer-predisposing_syndrome|Familial_cancer_of_breast|Tumor_susceptibility_linked_to_germline_BAP1_mutations|not_provided	RCV000131794.2|RCV000195468.3|RCV000222458.1|RCV000235842.1	rs587782570	.	.	.	.	4.06e-06
16	23626256	23626257	AA	-	frameshift_variant	coding	PALB2	NM_024675.4	c.2727_2728del	p.Thr911LeufsTer16	Pathogenic	Hereditary_cancer-predisposing_syndrome|Familial_cancer_of_breast|not_provided	RCV000160810.2|RCV000232116.2|RCV000254678.2	rs730881869	.	.	.	.	4.06e-06
16	23629768	23629768	C	A	stop_gained	coding	PALB2	NM_024675.4	c.2386G>T	p.Gly796Ter	Pathogenic/Likely_pathogenic	Familial_cancer_of_breast|Hereditary_cancer-predisposing_syndrome|not_provided	RCV000114524.4|RCV000129116.4|RCV000236024.2	rs180177112	.	.	.	.	4.06e-06
16	23629831	23629831	G	A	stop_gained	coding	PALB2	NM_024675.4	c.2323C>T	p.Gln775Ter	Pathogenic	Familial_cancer_of_breast|Breast_cancer\x2c_susceptibility_to|Hereditary_cancer-predisposing_syndrome|not_provided	RCV000114521.6|RCV000144702.3|RCV000164897.2|RCV000413982.1	rs180177111	.	.	.	.	4.06e-06
16	23630148	23630148	T	-	frameshift_variant	coding	PALB2	NM_024675.4	c.2006del	p.Glu669GlyfsTer3	Pathogenic	not_specified|Hereditary_cancer-predisposing_syndrome	RCV000121754.1|RCV000160806.1	rs587778584	.	.	.	.	.
16	23634928	23634928	-	AA	frameshift_variant	coding	PALB2	NM_024675.4	c.1616_1617dup	p.Asn540LeufsTer22	Pathogenic	Hereditary_cancer-predisposing_syndrome	RCV000166617.2	rs786203346	.	.	.	.	4.06e-06
16	23635229	23635229	C	-	frameshift_variant	coding	PALB2	NM_024675.4	c.1317del	p.Phe440LeufsTer12	Pathogenic	Familial_cancer_of_breast|Hereditary_cancer-predisposing_syndrome|not_provided	RCV000114470.5|RCV000129522.6|RCV000212789.3	.	.	.	.	.	4.07e-06
16	23635660	23635660	T	-	frameshift_variant	coding	PALB2	NM_024675.4	c.886del	p.Met296Ter	Pathogenic	not_provided	RCV000133493.1	rs587776408	.	.	.	.	4.06e-06
16	23635788	23635789	AG	-	frameshift_variant	coding	PALB2	NM_024675.4	c.757_758del	p.Leu253IlefsTer3	Pathogenic	Familial_cancer_of_breast|Fanconi_anemia\x2c_complementation_group_N|Pancreatic_cancer_3|Hereditary_cancer-predisposing_syndrome|not_provided	RCV000114658.4|RCV000114659.2|RCV000114660.1|RCV000116112.7|RCV000212779.1	rs180177092	.	.	.	8.24e-06	8.12e-06
16	23635819	23635819	-	TCTACAGACCTAA	stop_gained,frameshift_variant	coding	PALB2	NM_024675.4	c.726_727insTTAGGTCTGTAGA	p.Thr243LeufsTer4	Pathogenic	.	.	.	.	.	.	.	4.06e-06
16	23635834	23635834	T	A	stop_gained	coding	PALB2	NM_024675.4	c.712A>T	p.Arg238Ter	Pathogenic	.	.	.	.	.	.	.	4.06e-06
16	23636122	23636122	T	A	stop_gained	coding	PALB2	NM_024675.4	c.424A>T	p.Lys142Ter	Pathogenic	Hereditary_cancer-predisposing_syndrome|not_provided|Familial_cancer_of_breast	RCV000130421.4|RCV000412725.1|RCV000476449.1	rs587782005	.	.	.	8.24e-06	8.13e-06
16	23637865	23637865	G	A	stop_gained	coding	PALB2	NM_024675.4	c.196C>T	p.Gln66Ter	Pathogenic/Likely_pathogenic	Familial_cancer_of_breast|Hereditary_cancer-predisposing_syndrome|not_provided	RCV000114503.6|RCV000163078.2|RCV000235795.2	rs180177083	.	.	.	.	8.12e-06
16	23637883	23637883	G	A	stop_gained	coding	PALB2	NM_024675.4	c.178C>T	p.Gln60Ter	Pathogenic/Likely_pathogenic	not_provided	RCV000255924.1	.	.	.	.	.	4.06e-06
16	3589053	3589053	G	A	stop_gained	coding	SLX4	NM_032444.4	c.4585C>T	p.Gln1529Ter	Likely_pathogenic	.	.	.	.	.	.	.	4.07e-06
16	3589355	3589355	C	T	stop_gained	coding	SLX4	NM_032444.4	c.4283G>A	p.Trp1428Ter	Pathogenic	.	.	.	.	.	.	.	8.81e-06
16	3602208	3602208	C	-	frameshift_variant	coding	SLX4	NM_032444.4	c.860del	p.Ser287ThrfsTer20	Pathogenic	.	.	rs752720263	.	.	.	8.24e-06	8.12e-06
16	89738895	89738895	G	C	stop_gained	coding	FANCA	NM_000135.4	c.4247C>G	p.Ser1416Ter	Pathogenic/Likely_pathogenic	.	.	.	.	.	.	.	4.06e-06
16	89740803	89740803	C	G	splice_donor_variant	coding	FANCA	NM_000135.4	c.3828+1G>C	-	Likely_pathogenic	.	.	.	.	.	.	.	1.22e-05
16	89746890	89746890	T	C	missense_variant,splice_region_variant	coding	FANCA	NM_000135.4	c.3349A>G	p.Arg1117Gly	Pathogenic	Fanconi_anemia|not_provided	RCV000206698.3|RCV000254722.1	rs149277003	.	.	.	4.43e-05	1.29e-05
16	89748740	89748743	GACA	-	frameshift_variant	coding	FANCA	NM_000135.4	c.3264_3267del	p.Val1089SerfsTer27	Pathogenic	.	.	.	.	.	.	.	4.07e-06
16	89761970	89761970	-	CAGCTTCAGGTTGAATTTC	stop_gained,frameshift_variant	coding	FANCA	NM_000135.4	c.2812_2830dup	p.Asp944GlyfsTer5	Pathogenic	.	.	.	.	.	.	.	4.06e-06
16	89767153	89767153	-	CC	frameshift_variant	coding	FANCA	NM_000135.4	c.2587_2588dup	p.Leu864AlafsTer26	Pathogenic	.	.	.	.	.	.	.	4.06e-06
16	89770179	89770179	A	G	missense_variant	coding	FANCA	NM_000135.4	c.2303T>C	p.Leu768Pro	Likely_pathogenic	.	.	.	.	.	.	.	9.72e-06
16	89771803	89771803	G	A	stop_gained	coding	FANCA	NM_000135.4	c.2026C>T	p.Gln676Ter	Pathogenic/Likely_pathogenic	.	.	.	.	.	.	.	4.06e-06
16	89778980	89778985	ACGTAG	-	stop_gained,inframe_deletion	coding	FANCA	NM_000135.4	c.1734_1739del	p.Tyr578_Val580delinsTer	Likely_pathogenic	.	.	rs757504102	.	.	.	8.28e-06	4.06e-06
16	89779939	89779939	G	A	stop_gained	coding	FANCA	NM_000135.4	c.1645C>T	p.Gln549Ter	Pathogenic	.	.	rs779745863	.	.	.	8.24e-06	4.07e-06
16	89784856	89784856	G	A	stop_gained,splice_region_variant	coding	FANCA	NM_000135.4	c.1468C>T	p.Gln490Ter	Likely_pathogenic	.	.	.	.	.	.	.	4.06e-06
16	89792481	89792481	A	C	missense_variant	coding	FANCA	NM_000135.4	c.1073T>G	p.Leu358Arg	Pathogenic	.	.	.	.	.	.	.	4.1e-06
16	89799207	89799207	-	C	frameshift_variant	coding	FANCA	NM_000135.4	c.851dup	p.Val285SerfsTer54	Pathogenic	.	.	.	.	.	.	.	4.07e-06
16	89799233	89799233	C	A	splice_acceptor_variant	coding	FANCA	NM_000135.4	c.827-1G>T	-	Pathogenic	.	.	.	.	.	.	.	4.09e-06
16	89799620	89799620	G	A	stop_gained	coding	FANCA	NM_000135.4	c.811C>T	p.Gln271Ter	Pathogenic/Likely_pathogenic	Fanconi_anemia\x2c_complementation_group_A	RCV000410151.1	rs372163487	.	.	.	.	1.22e-05
16	89805393	89805393	C	G	splice_acceptor_variant	coding	FANCA	NM_000135.4	c.597-1G>C	-	Pathogenic/Likely_pathogenic	.	.	rs147945881	.	.	.	8.71e-06	.
16	89810953	89810953	-	G	frameshift_variant	coding	FANCA	NM_000135.4	c.401dup	p.Val135CysfsTer46	Pathogenic/Likely_pathogenic	.	.	.	.	.	.	.	4.06e-06
17	18277784	18277784	C	-	frameshift_variant	coding	TOP3A	NM_004618.5	c.2718del	p.Thr907LeufsTer101	Pathogenic	.	.	.	.	.	.	.	4.06e-06
17	35101356	35101356	G	-	frameshift_variant	coding	RAD51D	NM_002878.3	c.748del	p.His250ThrfsTer2	Pathogenic	Hereditary_cancer-predisposing_syndrome|not_provided|Breast-ovarian_cancer\x2c_familial_4	RCV000115820.6|RCV000212968.2|RCV000465960.1	rs587780105	.	.	.	.	4.07e-06
17	43047676	43047676	G	C	missense_variant	coding	BRCA1	NM_007294.4	c.5434C>G	p.Pro1812Ala	Pathogenic/Likely_pathogenic	Breast-ovarian_cancer\x2c_familial_1|Familial_cancer_of_breast	RCV000031251.8|RCV000048994.2	rs1800751	.	.	.	.	4.06e-06
17	43057137	43057137	T	C	splice_acceptor_variant	coding	BRCA1	NM_007294.4	c.5194-2A>G	-	Pathogenic/Likely_pathogenic	Breast-ovarian_cancer\x2c_familial_1|Familial_cancer_of_breast|Hereditary_cancer-predisposing_syndrome|not_provided\x2cFamilial_cancer_of_breast	RCV000031228.6|RCV000048853.2|RCV000131860.3|RCV000256055.1\x2cRCV000048852.2	rs80358069	.	.	.	.	4.06e-06
17	43067614	43067614	T	A	stop_gained	coding	BRCA1	NM_007294.4	c.5068A>T	p.Lys1690Ter	Pathogenic	Breast-ovarian_cancer\x2c_familial_1|Familial_cancer_of_breast\x2cnot_specified|Breast-ovarian_cancer\x2c_familial_1|Hereditary_cancer-predisposing_syndrome|Hereditary_breast_and_ovarian_cancer_syndrome|Breast_cancer	RCV000031207.5|RCV000048757.2\x2cRCV000048756.5|RCV000077592.3|RCV000130370.3|RCV000225765.1|RCV000240688.1	rs397507239	.	.	.	.	4.06e-06
17	43071046	43071046	G	C	missense_variant	coding	BRCA1	NM_007294.4	c.4868C>G	p.Ala1623Gly	Pathogenic/Likely_pathogenic	Breast-ovarian_cancer\x2c_familial_1|Hereditary_breast_and_ovarian_cancer_syndrome|not_provided|Hereditary_cancer-predisposing_syndrome	RCV000031195.6|RCV000048680.2|RCV000074598.7|RCV000131686.3	rs80356862	.	.	.	8.24e-06	4.06e-06
17	43071225	43071225	G	C	stop_gained	coding	BRCA1	NM_007294.4	c.4689C>G	p.Tyr1563Ter	Pathogenic	Breast-ovarian_cancer\x2c_familial_1|Hereditary_breast_and_ovarian_cancer_syndrome|Hereditary_cancer-predisposing_syndrome|not_provided|Familial_cancer_of_breast	RCV000031188.9|RCV000048631.6|RCV000131835.3|RCV000159994.3|RCV000464295.1	rs80357433	.	.	.	.	8.15e-06
17	43092046	43092046	T	-	frameshift_variant	coding	BRCA1	NM_007294.4	c.3485del	p.Asp1162ValfsTer48	Pathogenic	Breast-ovarian_cancer\x2c_familial_1|Hereditary_breast_and_ovarian_cancer_syndrome|not_provided|Hereditary_cancer-predisposing_syndrome|Familial_cancer_of_breast	RCV000031112.7|RCV000048213.5|RCV000159918.2|RCV000220121.1|RCV000408844.1	rs80357509	.	.	.	.	4.06e-06
17	43092131	43092131	C	A	stop_gained	coding	BRCA1	NM_007294.4	c.3400G>T	p.Glu1134Ter	Pathogenic	Breast-ovarian_cancer\x2c_familial_1|not_provided|Hereditary_breast_and_ovarian_cancer_syndrome	RCV000031110.8|RCV000048178.5|RCV000203638.2	rs80357018	.	.	.	.	.
17	43092416	43092416	C	-	frameshift_variant	coding	BRCA1	NM_007294.4	c.3115del	p.Ala1039ProfsTer9	Pathogenic	Breast-ovarian_cancer\x2c_familial_1	RCV000256940.2	.	.	.	.	.	.
17	43092823	43092823	-	AT	frameshift_variant	coding	BRCA1	NM_007294.4	c.2706_2707dup	p.Cys903TyrfsTer98	Pathogenic	Breast-ovarian_cancer\x2c_familial_1|Hereditary_cancer-predisposing_syndrome|Hereditary_breast_and_ovarian_cancer_syndrome	RCV000031064.6|RCV000132203.2|RCV000459878.1	rs80357717	.	.	.	.	8.14e-06
17	43093056	43093056	G	-	frameshift_variant	coding	BRCA1	NM_007294.4	c.2475del	p.Asp825GlufsTer21	Pathogenic	Breast-ovarian_cancer\x2c_familial_1|Hereditary_breast_and_ovarian_cancer_syndrome|Hereditary_cancer-predisposing_syndrome|not_provided	RCV000031053.9|RCV000047850.6|RCV000131352.3|RCV000236906.3	rs80357970	.	.	.	.	4.07e-06
17	43093705	43093708	TTCT	-	frameshift_variant	coding	BRCA1	NM_007294.4	c.1823_1826del	p.Lys608IlefsTer3	Pathogenic	Hereditary_breast_and_ovarian_cancer_syndrome|Breast-ovarian_cancer\x2c_familial_1|Hereditary_cancer-predisposing_syndrome	RCV000047598.3|RCV000111693.7|RCV000131901.3	rs80357952	.	.	.	.	4.07e-06
17	43093951	43093952	TT	-	frameshift_variant	coding	BRCA1	NM_007294.4	c.1579_1580del	p.Lys527AspfsTer3	Pathogenic	Breast-ovarian_cancer\x2c_familial_1	RCV000083023.4	rs431825387	.	.	.	.	4.08e-06
17	43094602	43094602	T	-	frameshift_variant	coding	BRCA1	NM_007294.4	c.929del	p.Gln310ArgfsTer4	Pathogenic	Breast-ovarian_cancer\x2c_familial_1|Familial_cancer_of_breast|Hereditary_cancer-predisposing_syndrome|not_provided	RCV000031289.8|RCV000049194.2|RCV000131986.2|RCV000235314.1	rs80357844	.	.	.	.	4.06e-06
17	43104923	43104923	A	-	frameshift_variant	coding	BRCA1	NM_007294.4	c.246del	p.Val83LeufsTer5	Pathogenic	Breast-ovarian_cancer\x2c_familial_1	RCV000256532.2	.	.	.	.	.	4.06e-06
17	43104967	43104967	A	C	intron_variant	noncoding	BRCA1	NM_007294.4	c.213-11T>G	-	Pathogenic	Breast-ovarian_cancer\x2c_familial_1|Hereditary_breast_and_ovarian_cancer_syndrome|not_provided|Hereditary_cancer-predisposing_syndrome|Familial_cancer_of_breast	RCV000031030.7|RCV000047725.7|RCV000074570.7|RCV000131898.3|RCV000469831.1	rs80358061	.	.	.	8.25e-06	1.22e-05
17	58695008	58695008	-	A	stop_gained,frameshift_variant	coding	RAD51C	NM_058216.3	c.224dup	p.Tyr75Ter	Pathogenic	Hereditary_cancer-predisposing_syndrome|Fanconi_anemia\x2c_complementation_group_O|not_provided|Breast-ovarian_cancer\x2c_familial_3	RCV000160933.4|RCV000206050.2|RCV000258982.2|RCV000409268.1	rs730881939	.	.	.	.	1.22e-05
17	58696811	58696811	-	C	frameshift_variant	coding	RAD51C	NM_058216.3	c.525dup	p.Cys176LeufsTer27	Pathogenic	.	.	rs768793789	.	.	.	8.24e-06	8.12e-06
17	58709972	58709972	A	-	frameshift_variant	coding	RAD51C	NM_058216.3	c.821del	p.Asn274IlefsTer5	Pathogenic	.	.	.	.	.	.	.	4.06e-06
17	61743118	61743118	-	A	frameshift_variant	coding	BRIP1	NM_032043.3	c.2273dup	p.Ala759SerfsTer6	Pathogenic/Likely_pathogenic	Hereditary_cancer-predisposing_syndrome|not_provided	RCV000116138.4|RCV000258967.1	rs587780236	.	.	.	8.25e-06	8.13e-06
17	61744433	61744434	TT	-	frameshift_variant,splice_region_variant	coding	BRIP1	NM_032043.3	c.2255_2256del	p.Lys752ArgfsTer12	Pathogenic	Hereditary_cancer-predisposing_syndrome|Familial_cancer_of_breast|Fanconi_anemia\x2c_complementation_group_J|not_provided	RCV000160364.5|RCV000167986.3|RCV000167986.3|RCV000212320.3	rs730881649	.	.	.	1.65e-05	8.13e-06
17	61744463	61744463	-	TAC	stop_gained	coding	BRIP1	NM_032043.3	c.2223_2225dup	p.Val741_Tyr742insTer	Pathogenic	.	.	.	.	.	.	.	4.06e-06
17	61780342	61780342	-	C	frameshift_variant	coding	BRIP1	NM_032043.3	c.1853_1854insG	p.Pro619ThrfsTer20	Pathogenic/Likely_pathogenic	Hereditary_cancer-predisposing_syndrome|Neoplasm_of_ovary|Fanconi_anemia\x2c_complementation_group_J	RCV000130385.3|RCV000409999.1|RCV000412318.1	rs587781985	.	.	.	.	4.06e-06
17	61799200	61799200	G	A	stop_gained	coding	BRIP1	NM_032043.3	c.1240C>T	p.Gln414Ter	Pathogenic/Likely_pathogenic	Hereditary_cancer-predisposing_syndrome|Fanconi_anemia\x2c_complementation_group_J|Neoplasm_of_ovary|not_provided	RCV000129878.3|RCV000409609.1|RCV000411128.1|RCV000445256.1	rs368796923	.	.	.	8.25e-06	4.07e-06
17	61849241	61849241	-	T	frameshift_variant	coding	BRIP1	NM_032043.3	c.394dup	p.Thr132AsnfsTer10	Pathogenic	Hereditary_cancer-predisposing_syndrome	RCV000129282.3	rs587781416	.	.	.	.	8.13e-06
17	61857233	61857233	T	C	splice_acceptor_variant	coding	BRIP1	NM_032043.3	c.206-2A>G	-	Pathogenic/Likely_pathogenic	Hereditary_cancer-predisposing_syndrome|not_provided	RCV000167120.2|RCV000214974.1	rs786203700	.	.	.	.	4.07e-06
17	61861516	61861516	A	T	stop_gained	coding	BRIP1	NM_032043.3	c.24T>A	p.Tyr8Ter	Pathogenic	Hereditary_cancer-predisposing_syndrome	RCV000216493.1	rs752411477	.	.	.	8.27e-06	4.06e-06
17	7674241	7674241	G	A	missense_variant	coding	TP53	NM_000546.6	c.722C>T	p.Ser241Phe	Likely_pathogenic	Hepatoblastoma|Osteosarcoma|Hereditary_cancer-predisposing_syndrome|Squamous_cell_carcinoma_of_the_skin|Malignant_lymphoma\x2c_non-Hodgkin|Brainstem_glioma|Oesophageal_carcinoma|Neoplasm_of_breast|Squamous_cell_carcinoma_of_the_head_and_neck|Uterine_Carcinosarcoma|Adenocarcinoma_of_lung|Malignant_melanoma_of_skin|Papillary_renal_cell_carcinoma\x2c_sporadic|Neoplasm_of_brain|Glioblastoma|Malignant…	RCV000013153.24|RCV000013154.22|RCV000130168.3|RCV000417576.1|RCV000418653.1|RCV000421750.1|RCV000422867.1|RCV000423921.1|RCV000426268.1|RCV000426907.1|RCV000428255.1|RCV000429321.1|RCV000430665.1|RCV000433125.1|RCV000434173.1|RCV000435867.1|RCV000436527.1|RCV000436959.1|RCV000438965.1|RCV000441398.1|RCV000441622.1|RCV000444801.1\x2cRCV000154419.1|RCV000236210.1|RCV000417965.1|RCV000419417.1|RCV0…	rs28934573	COSM1649402;COSM10812;COSM214172;COSM214171;COSM3522695;COSM214170	1(salivary_gland);1(vulva);12(ovary);11(breast);5(NS);8(haematopoietic_and_lymphoid_tissue);3(stomach);12(urinary_tract);5(pancreas);2(liver);6(oesophagus);17(skin);5(lung);3(upper_aerodigestive_tract);14(large_intestine);8(central_nervous_system);3(biliary_tract);4(endometrium)	.	.	4.06e-06
17	7675088	7675088	C	T	missense_variant	coding	TP53	NM_000546.6	c.524G>A	p.Arg175His	Pathogenic	Hereditary_cancer-predisposing_syndrome\x2cLi-Fraumeni_syndrome_1|Hereditary_cancer-predisposing_syndrome|Li-Fraumeni_syndrome|not_provided|Malignant_tumor_of_esophagus|Neoplasm|Neoplasm_of_breast	RCV000161065.2\x2cRCV000013173.21|RCV000131301.5|RCV000204931.3|RCV000213054.3|RCV000239398.1|RCV000421746.1|RCV000428918.1	rs28934578	COSM10648;COSM3355994;COSM99022;COSM1640851;COSM99024;COSM99023;COSM99914	10(salivary_gland);5(vulva);72(ovary);5(bone);124(breast);1(penis);2(NS);55(haematopoietic_and_lymphoid_tissue);75(stomach);1(soft_tissue);7(kidney);28(urinary_tract);47(pancreas);1(peritoneum);11(liver);91(oesophagus);4(adrenal_gland);6(skin);8(prostate);20(lung);2(thyroid);4(cervix);76(upper_aerodigestive_tract);375(large_intestine);79(central_nervous_system);1(small_intestine);14(biliary_tract…	.	8.24e-06	4.06e-06
18	22946473	22946473	C	T	stop_gained	coding	RBBP8	NM_002894.3	c.139C>T	p.Gln47Ter	Likely_pathogenic	not_provided	RCV000429695.1	rs762396810	.	.	.	8.44e-06	2.04e-05
19	12806742	12806742	G	A	synonymous_variant	coding	RNASEH2A	NM_006397.3	c.69G>A	p.Val23=	Pathogenic	Aicardi_Goutieres_syndrome_4	RCV000056304.6	rs397515480	.	.	.	0	1.73e-05
19	45352547	45352547	T	-	frameshift_variant	coding	ERCC2	NM_000400.4	c.2005del	p.Arg669GlyfsTer40	Pathogenic	.	.	.	.	.	.	.	4.06e-06
19	45353336	45353336	T	A	splice_acceptor_variant	coding	ERCC2	NM_000400.4	c.1666-2A>T	-	Likely_pathogenic	.	.	rs199658345	.	.	.	.	4.1e-06
22	28689217	28689217	T	C	splice_acceptor_variant	coding	CHEK2	NM_007194.4	c.1462-2A>G	-	Likely_pathogenic	Hereditary_cancer-predisposing_syndrome	RCV000131803.2	rs587782575	.	.	.	.	4.37e-06
22	28695125	28695126	AC	-	splice_donor_variant	coding	CHEK2	NM_007194.4	c.1375+1_1375+2del	-	Likely_pathogenic	Hereditary_cancer-predisposing_syndrome	RCV000220512.1	.	.	.	.	.	4.07e-06
22	28710034	28710035	TC	-	frameshift_variant	coding	CHEK2	NM_007194.4	c.817_818del	p.Glu273AsnfsTer16	Pathogenic	.	.	.	.	.	.	.	4.08e-06
22	28724994	28724994	G	T	stop_gained	coding	CHEK2	NM_007194.4	c.575C>A	p.Ser192Ter	Pathogenic	.	.	.	.	.	.	.	4.06e-06
22	28725040	28725040	T	A	stop_gained	coding	CHEK2	NM_007194.4	c.529A>T	p.Lys177Ter	Pathogenic	.	.	rs796389290	.	.	.	.	4.06e-06
22	28725315	28725315	G	-	frameshift_variant	coding	CHEK2	NM_007194.4	c.372del	p.Phe125LeufsTer6	Pathogenic/Likely_pathogenic	not_provided	RCV000221519.1	.	.	.	.	.	4.06e-06
22	28734637	28734637	G	A	stop_gained	coding	CHEK2	NM_007194.4	c.85C>T	p.Gln29Ter	Pathogenic/Likely_pathogenic	Hereditary_cancer-predisposing_syndrome|Familial_cancer_of_breast	RCV000167444.2|RCV000228262.2	rs761494650	.	.	.	8.31e-06	8.19e-06
Non-Finnish European (Other Non-Finnish European)
1	241850561	241850561	C	-	frameshift_variant	coding	EXO1	NM_130398.4	c.136del	p.Leu46Ter	Likely_pathogenic	.	.	rs750915959	.	.	.	8.24e-06	8.13e-06
1	45331746	45331746	G	-	frameshift_variant	coding	MUTYH	NM_001048174.2	c.1017del	p.Arg340GlyfsTer40	Pathogenic	.	.	.	.	.	.	.	4.07e-06
1	45332574	45332574	C	T	splice_region_variant,synonymous_variant	coding	MUTYH	NM_001048174.2	c.606G>A	p.Gln202=	Pathogenic/Likely_pathogenic	.	.	rs199989617	.	.	.	.	4.06e-06
1	45332636	45332636	G	A	stop_gained	coding	MUTYH	NM_001048174.2	c.544C>T	p.Gln182Ter	Pathogenic	Hereditary_cancer-predisposing_syndrome|not_provided	RCV000223123.1|RCV000426595.1	rs376561094	.	.	.	8.24e-06	4.06e-06
1	45333100	45333100	-	ATCCAT	inframe_insertion	coding	MUTYH	NM_001048174.2	c.369_374dup	p.Trp124_Met125insIleTrp	Pathogenic/Likely_pathogenic	Hereditary_cancer-predisposing_syndrome|MYH-associated_polyposis	RCV000215777.1|RCV000461918.1	.	.	.	.	.	4.06e-06
2	127292621	127292621	G	A	stop_gained	coding	ERCC3	NM_000122.2	c.460C>T	p.Gln154Ter	Pathogenic	.	.	.	.	.	.	.	4.06e-06
2	127292785	127292785	A	G	missense_variant	coding	ERCC3	NM_000122.2	c.296T>C	p.Phe99Ser	Pathogenic	Xeroderma_pigmentosum\x2c_complementation_group_b	RCV000018051.24	rs121913045	.	.	.	.	4.07e-06
2	214767563	214767563	G	C	stop_gained	coding	BARD1	NM_000465.4	c.1487C>G	p.Ser496Ter	Pathogenic	.	.	.	.	.	.	.	4.06e-06
2	214780875	214780876	AG	-	frameshift_variant	coding	BARD1	NM_000465.4	c.998_999del	p.Ser333Ter	Pathogenic	.	.	.	.	.	.	.	4.07e-06
2	219158194	219158194	G	C	missense_variant	coding	NHEJ1	NM_024782.3	c.169C>G	p.Arg57Gly	Pathogenic	Severe_combined_immunodeficiency_with_microcephaly\x2c_growth_retardation\x2c_and_sensitivity_to_ionizing_radiation	RCV000001032.2	rs118204451	.	.	.	8.24e-06	4.06e-06
2	47416323	47416324	CA	-	frameshift_variant	coding	MSH2	NM_000251.3	c.970_971del	p.Gln324ValfsTer8	Pathogenic	Lynch_syndrome	RCV000076767.2	rs63751044	.	.	.	.	4.06e-06
2	47429783	47429783	G	-	frameshift_variant	coding	MSH2	NM_000251.3	c.1119del	p.Arg373SerfsTer39	Pathogenic	Lynch_syndrome	RCV000076042.2	rs63750516	.	.	.	.	4.06e-06
2	47475051	47475053	AAT	-	inframe_deletion	coding	MSH2	NM_000251.3	c.1786_1788del	p.Asn596del	Pathogenic	Lynch_syndrome_I|Lynch_syndrome|Hereditary_cancer-predisposing_syndrome|not_provided	RCV000001827.4|RCV000076285.3|RCV000128908.4|RCV000202293.1	rs63749831	.	.	.	8.25e-06	4.06e-06
2	47799441	47799442	TG	-	frameshift_variant	coding	MSH6	NM_000179.3	c.1458_1459del	p.Glu487AspfsTer10	Pathogenic	.	.	.	.	.	.	.	4.07e-06
2	47799604	47799604	A	C	missense_variant	coding	MSH6	NM_000179.3	c.1621A>C	p.Ser541Arg	Likely_pathogenic	Lynch_syndrome|Hereditary_cancer-predisposing_syndrome	RCV000114750.2|RCV000129248.2	rs587779778	.	.	.	8.25e-06	4.06e-06
2	47800202	47800202	T	G	stop_gained	coding	MSH6	NM_000179.3	c.2219T>G	p.Leu740Ter	Pathogenic	.	.	.	.	.	.	.	4.07e-06
2	47800211	47800211	-	G	frameshift_variant	coding	MSH6	NM_000179.3	c.2230dup	p.Glu744GlyfsTer12	Pathogenic/Likely_pathogenic	Hereditary_cancer-predisposing_syndrome|Lynch_syndrome|not_provided	RCV000162451.2|RCV000198617.4|RCV000221977.2	rs786201050	.	.	.	8.25e-06	4.07e-06
2	47805636	47805636	-	TGAA	frameshift_variant	coding	MSH6	NM_000179.3	c.3577_3580dup	p.Leu1194Ter	Pathogenic	.	.	rs773262801	.	.	.	8.25e-06	4.06e-06
2	47806588	47806588	-	TCAAAAGGGACATAGAAAA	frameshift_variant	coding	MSH6	NM_000179.3	c.3939_3957dup	p.Ala1320SerfsTer5	Pathogenic	Lynch_syndrome|Hereditary_cancer-predisposing_syndrome|not_provided	RCV000074954.2|RCV000129554.5|RCV000202115.1	rs763673818	.	.	.	8.37e-06	4.08e-06
2	47806628	47806628	-	AATC	frameshift_variant	coding	MSH6	NM_000179.3	c.3980_3983dup	p.Leu1330ValfsTer12	Pathogenic	Hereditary_cancer-predisposing_syndrome|Lynch_syndrome|not_provided	RCV000164350.2|RCV000168228.2|RCV000202005.1	rs786204180	.	.	.	.	4.14e-06
3	10034467	10034467	A	T	splice_acceptor_variant	coding	FANCD2	NM_001018115.3	c.206-2A>T	-	Pathogenic	.	.	rs771573600	.	.	.	8.25e-06	4.06e-06
3	14168370	14168373	CTCA	-	frameshift_variant	coding	XPC	NM_004628.5	c.420_423del	p.Glu141LeufsTer6	Pathogenic	.	.	.	.	.	.	.	4.06e-06
3	14173038	14173038	G	-	frameshift_variant	coding	XPC	NM_004628.5	c.128del	p.Pro43GlnfsTer36	Pathogenic	.	.	.	.	.	.	.	4.56e-06
3	36993549	36993549	T	C	start_lost	coding	MLH1	NM_000249.4	c.2T>C	p.Met1?	Pathogenic	Lynch_syndrome\x2cLynch_syndrome\x2cLynch_syndrome	RCV000075620.2\x2cRCV000075621.2\x2cRCV000075622.2	rs111052004	.	.	.	.	4.06e-06
3	37004474	37004474	G	C	missense_variant,splice_region_variant	coding	MLH1	NM_000249.4	c.380G>C	p.Arg127Thr	Likely_pathogenic	.	.	.	.	.	.	.	4.06e-06
3	37047684	37047684	G	T	splice_donor_variant	coding	MLH1	NM_000249.4	c.1896+1G>T	-	Likely_pathogenic	Lynch_syndrome\x2cLynch_syndrome	RCV000075404.2\x2cRCV000075405.2	rs267607867	.	.	.	.	4.06e-06
5	132559283	132559283	G	T	splice_acceptor_variant	coding	RAD50	NM_005732.4	c.130-1G>T	-	Likely_pathogenic	Hereditary_cancer-predisposing_syndrome	RCV000218272.1	.	.	.	.	.	4.14e-06
5	132594921	132594925	AAAAG	-	frameshift_variant	coding	RAD50	NM_005732.4	c.1849_1853del	p.Arg617GlyfsTer13	Pathogenic	.	.	.	.	.	.	.	4.07e-06
5	132618277	132618277	T	G	stop_gained	coding	RAD50	NM_005732.4	c.3372T>G	p.Tyr1124Ter	Pathogenic	Hereditary_cancer-predisposing_syndrome	RCV000218193.1	rs775069541	.	.	.	8.3e-06	8.13e-06
5	60898322	60898322	T	C	missense_variant	coding	ERCC8	NM_000082.4	c.797A>G	p.Asp266Gly	Pathogenic	not_provided	RCV000059651.1	rs281875225	.	.	.	8.26e-06	8.13e-06
5	75590429	75590429	G	A	missense_variant	coding	POLK	NM_016218.3	c.1345G>A	p.Glu449Lys	Pathogenic	.	.	.	.	.	.	.	4.07e-06
5	80656476	80656479	AAAG	-	frameshift_variant	coding	MSH3	NM_002439.5	c.307_310del	p.Lys103SerfsTer22	Pathogenic	.	.	.	.	.	.	.	.
6	158191975	158191975	A	G	splice_acceptor_variant	coding	GTF2H5	NM_207118.3	c.36-2A>G	-	Likely_pathogenic	.	.	rs765378190	.	.	.	8.25e-06	4.06e-06
6	43587375	43587375	C	T	stop_gained	coding	POLH	NM_006502.3	c.376C>T	p.Gln126Ter	Pathogenic	Xeroderma_pigmentosum\x2c_variant_type	RCV000006247.2	rs121908563	.	.	.	.	4.06e-06
6	43610596	43610596	C	T	stop_gained	coding	POLH	NM_006502.3	c.1117C>T	p.Gln373Ter	Pathogenic	Xeroderma_pigmentosum\x2c_variant_type	RCV000006248.2	rs121908564	.	.	.	.	4.06e-06
7	152676040	152676040	C	T	splice_donor_variant	coding	XRCC2	NM_005431.2	c.39+1G>A	-	Likely_pathogenic	.	.	rs560785131	.	.	0.0002	1.67e-05	8.15e-06
7	5982843	5982843	G	A	stop_gained	coding	PMS2	NM_000535.7	c.2155C>T	p.Gln719Ter	Pathogenic	Hereditary_cancer-predisposing_syndrome	RCV000219006.1	.	.	.	.	.	8.62e-06
7	5982993	5982993	T	G	splice_acceptor_variant	coding	PMS2	NM_000535.7	c.2007-2A>C	-	Pathogenic/Likely_pathogenic	Hereditary_cancer-predisposing_syndrome	RCV000131264.2	rs587782336	.	.	.	.	6.5e-06
7	5987185	5987186	CT	-	frameshift_variant	coding	PMS2	NM_000535.7	c.1579_1580del	p.Arg527GlyfsTer14	Pathogenic	.	.	.	.	.	.	.	4.07e-06
7	6002590	6002590	G	A	stop_gained	coding	PMS2	NM_000535.7	c.400C>T	p.Arg134Ter	Pathogenic	Turcot_syndrome|Lynch_syndrome|Hereditary_cancer-predisposing_syndrome|not_provided	RCV000009815.5|RCV000076872.3|RCV000115695.5|RCV000212842.1	rs63750871	.	.	.	8.24e-06	4.07e-06
7	6005918	6005918	C	T	missense_variant	coding	PMS2	NM_000535.7	c.137G>A	p.Ser46Asn	Pathogenic/Likely_pathogenic	Turcot_syndrome|Hereditary_nonpolyposis_colorectal_cancer_type_4|Lynch_syndrome|Hereditary_cancer-predisposing_syndrome|not_provided\x2cLynch_syndrome	RCV000009826.7|RCV000056324.5|RCV000076807.6|RCV000115657.7|RCV000200994.3\x2cRCV000076806.2	rs121434629	.	.	.	1.73e-05	8.32e-06
7	6005934	6005934	C	A	stop_gained	coding	PMS2	NM_000535.7	c.121G>T	p.Glu41Ter	Pathogenic	Lynch_syndrome	RCV000203898.2	.	.	.	.	.	4.16e-06
8	89953615	89953615	G	A	stop_gained	coding	NBN	NM_002485.5	c.1474C>T	p.Gln492Ter	Pathogenic	Hereditary_cancer-predisposing_syndrome\x2cHereditary_cancer-predisposing_syndrome	RCV000130673.3\x2cRCV000213507.1	rs587782130	.	.	.	.	4.07e-06
9	35074990	35074990	C	-	frameshift_variant	coding	FANCG	NM_004629.2	c.1573del	p.Val525Ter	Pathogenic	.	.	rs753485145	.	.	.	8.24e-06	4.06e-06
9	35076532	35076532	C	A	stop_gained	coding	FANCG	NM_004629.2	c.976G>T	p.Glu326Ter	Pathogenic	.	.	rs754484649	.	.	.	8.24e-06	4.06e-06
9	35077263	35077263	C	A	splice_donor_variant	coding	FANCG	NM_004629.2	c.646+1G>T	-	Pathogenic	.	.	.	.	.	.	.	4.06e-06
9	35078338	35078338	C	A	stop_gained	coding	FANCG	NM_004629.2	c.313G>T	p.Glu105Ter	Pathogenic	Fanconi_anemia\x2c_complementation_group_G	RCV000007104.2	rs121434425	.	.	.	1.7e-05	1.23e-05
9	95111630	95111630	C	A	stop_gained	coding	FANCC	NM_000136.3	c.1162G>T	p.Gly388Ter	Pathogenic/Likely_pathogenic	not_provided|Fanconi_anemia\x2c_complementation_group_C\x2cFanconi_anemia	RCV000202668.1|RCV000409441.1\x2cRCV000205129.1	.	.	.	.	.	8.13e-06
10	49470367	49470367	-	TC	frameshift_variant	coding	ERCC6	NM_000124.4	c.3591_3592dup	p.Lys1198ArgfsTer4	Likely_pathogenic	.	.	.	.	.	.	.	4.06e-06
10	49482759	49482759	-	G	frameshift_variant	coding	ERCC6	NM_000124.4	c.2096dup	p.Leu700ValfsTer60	Pathogenic/Likely_pathogenic	Cockayne_syndrome_B	RCV000170377.1	rs774791374	.	.	.	8.24e-06	8.13e-06
10	49493116	49493116	C	T	splice_donor_variant	coding	ERCC6	NM_000124.4	c.1821+1G>A	-	Likely_pathogenic	.	.	.	.	.	.	.	4.07e-06
10	49506014	49506014	T	C	splice_acceptor_variant	coding	ERCC6	NM_000124.4	c.1398-2A>G	-	Likely_pathogenic	.	.	.	.	.	.	.	4.08e-06
11	108227674	108227675	AT	-	frameshift_variant	coding	ATM	NM_000051.4	c.50_51del	p.His17ArgfsTer2	Pathogenic	.	.	rs775561876	.	.	.	8.24e-06	4.06e-06
11	108229328	108229328	G	A	splice_region_variant,intron_variant	coding	ATM	NM_000051.4	c.331+5G>A	-	Pathogenic/Likely_pathogenic	Hereditary_cancer-predisposing_syndrome|Ataxia-telangiectasia_syndrome	RCV000216445.1|RCV000410500.1	rs752135143	.	.	.	8.84e-06	4.09e-06
11	108235719	108235719	A	-	frameshift_variant	coding	ATM	NM_000051.4	c.381del	p.Val128Ter	Pathogenic/Likely_pathogenic	Hereditary_cancer-predisposing_syndrome	RCV000130118.3	rs587781831	.	.	.	.	4.07e-06
11	108235730	108235730	C	G	stop_gained	coding	ATM	NM_000051.4	c.392C>G	p.Ser131Ter	Pathogenic/Likely_pathogenic	.	.	.	.	.	.	.	4.06e-06
11	108244927	108244927	C	T	stop_gained	coding	ATM	NM_000051.4	c.802C>T	p.Gln268Ter	Pathogenic/Likely_pathogenic	Ataxia-telangiectasia_syndrome|Hereditary_cancer-predisposing_syndrome	RCV000169336.1|RCV000222842.1	rs557012154	.	.	0.0002	8.25e-06	4.07e-06
11	108250938	108250938	-	T	frameshift_variant	coding	ATM	NM_000051.4	c.1476dup	p.Arg493SerfsTer6	Pathogenic	.	.	.	.	.	.	.	4.06e-06
11	108250966	108250966	C	T	stop_gained	coding	ATM	NM_000051.4	c.1501C>T	p.Gln501Ter	Pathogenic	.	.	.	.	.	.	.	4.06e-06
11	108256281	108256281	-	A	stop_gained,frameshift_variant	coding	ATM	NM_000051.4	c.2192dup	p.Tyr731Ter	Pathogenic/Likely_pathogenic	.	.	.	.	.	.	.	4.07e-06
11	108259074	108259074	T	G	stop_gained,splice_region_variant	coding	ATM	NM_000051.4	c.2465T>G	p.Leu822Ter	Pathogenic	.	.	.	COSM1235399	1(haematopoietic_and_lymphoid_tissue)	.	.	4.08e-06
11	108271102	108271102	C	-	frameshift_variant	coding	ATM	NM_000051.4	c.2880del	p.Leu961CysfsTer10	Pathogenic/Likely_pathogenic	Hereditary_cancer-predisposing_syndrome|Ataxia-telangiectasia_syndrome	RCV000159629.1|RCV000412201.1	rs758561876	.	.	.	8.25e-06	4.06e-06
11	108272782	108272782	G	T	stop_gained	coding	ATM	NM_000051.4	c.3214G>T	p.Glu1072Ter	Pathogenic	.	.	.	.	.	.	.	4.06e-06
11	108284370	108284370	-	T	frameshift_variant	coding	ATM	NM_000051.4	c.3894dup	p.Ala1299CysfsTer3	Pathogenic	Hereditary_cancer-predisposing_syndrome|Ataxia-telangiectasia_syndrome|not_provided	RCV000130103.3|RCV000231882.1|RCV000342511.1	rs587781823	.	.	.	.	8.13e-06
11	108292675	108292675	T	G	stop_gained	coding	ATM	NM_000051.4	c.4493T>G	p.Leu1498Ter	Pathogenic	.	.	.	.	.	.	.	4.06e-06
11	108302975	108302975	G	-	frameshift_variant	coding	ATM	NM_000051.4	c.5443del	p.Asp1815ThrfsTer13	Pathogenic	Ataxia-telangiectasia_syndrome	RCV000226250.1	rs772138812	.	.	.	8.24e-06	4.07e-06
11	108304732	108304732	C	T	stop_gained	coding	ATM	NM_000051.4	c.5554C>T	p.Gln1852Ter	Pathogenic/Likely_pathogenic	Hereditary_cancer-predisposing_syndrome\x2cAtaxia-telangiectasia_syndrome	RCV000218844.1\x2cRCV000409717.1	rs754562056	COSM5418415;COSM5418414	1(haematopoietic_and_lymphoid_tissue)	.	8.28e-06	4.07e-06
11	108310158	108310158	A	C	splice_acceptor_variant	coding	ATM	NM_000051.4	c.5763-2A>C	-	Likely_pathogenic	Hereditary_cancer-predisposing_syndrome\x2cAtaxia-telangiectasia_syndrome	RCV000216373.1\x2cRCV000410861.1	.	.	.	.	.	4.07e-06
11	108317374	108317374	C	A	missense_variant,splice_region_variant	coding	ATM	NM_000051.4	c.6200C>A	p.Ala2067Asp	Pathogenic/Likely_pathogenic	Ataxia-telangiectasia_variant|Hereditary_cancer-predisposing_syndrome|Ataxia-telangiectasia_syndrome	RCV000032965.4|RCV000166627.2|RCV000258124.2	rs397514577	COSM1235429	1(haematopoietic_and_lymphoid_tissue)	.	.	4.06e-06
11	108317401	108317401	T	-	frameshift_variant	coding	ATM	NM_000051.4	c.6228del	p.Leu2077PhefsTer5	Pathogenic	Hereditary_cancer-predisposing_syndrome|Ataxia-telangiectasia_syndrome|not_provided	RCV000166124.1|RCV000205743.2|RCV000236779.1	rs786203008	.	.	.	.	.
11	108330233	108330233	C	T	stop_gained	coding	ATM	NM_000051.4	c.7327C>T	p.Arg2443Ter	Pathogenic/Likely_pathogenic	Ataxia-telangiectasia_syndrome|Hereditary_cancer-predisposing_syndrome	RCV000003175.8|RCV000220229.1	rs121434220	COSM1350997;COSM21678	1(haematopoietic_and_lymphoid_tissue);1(adrenal_gland)	.	.	4.07e-06
11	108331877	108331877	A	C	splice_acceptor_variant	coding	ATM	NM_000051.4	c.7630-2A>C	-	Pathogenic	Hereditary_cancer-predisposing_syndrome|Ataxia-telangiectasia_syndrome|not_provided	RCV000115253.7|RCV000206201.3|RCV000212074.2	rs587779866	.	.	.	1.66e-05	1.22e-05
11	108332026	108332026	C	T	stop_gained	coding	ATM	NM_000051.4	c.7777C>T	p.Gln2593Ter	Pathogenic	.	.	rs781215442	COSM24631	1(haematopoietic_and_lymphoid_tissue)	.	8.31e-06	4.07e-06
11	108332037	108332037	G	A	splice_region_variant,synonymous_variant	coding	ATM	NM_000051.4	c.7788G>A	p.Glu2596=	Pathogenic/Likely_pathogenic	Ataxia-telangiectasia_syndrome|not_provided|Hereditary_cancer-predisposing_syndrome\x2cAtaxia-telangiectasia_syndrome	RCV000122884.2|RCV000159654.2|RCV000217179.1\x2cRCV000227156.1	rs587780639	.	.	.	8.35e-06	8.14e-06
11	108335878	108335878	C	T	stop_gained	coding	ATM	NM_000051.4	c.8185C>T	p.Gln2729Ter	Pathogenic/Likely_pathogenic	Hereditary_cancer-predisposing_syndrome|Ataxia-telangiectasia_syndrome	RCV000130347.3|RCV000410300.1	rs587781967	.	.	.	8.36e-06	4.07e-06
11	108343244	108343245	GT	-	frameshift_variant	coding	ATM	NM_000051.4	c.8292_8293del	p.Ser2764ArgfsTer4	Pathogenic/Likely_pathogenic	not_provided|Ataxia-telangiectasia_syndrome	RCV000236646.1|RCV000477401.1	.	.	.	.	.	4.06e-06
11	47234780	47234783	AAAG	-	frameshift_variant	coding	DDB2	NM_000107.3	c.730_733del	p.Lys244Ter	Pathogenic/Likely_pathogenic	.	.	.	.	.	.	.	4.06e-06
12	56744029	56744029	G	C	intron_variant	noncoding	PRIM1	NM_000946.3	c.638+36C>G	-	Pathogenic	.	.	.	.	.	.	.	1.26e-05
13	102862263	102862266	AGGA	-	frameshift_variant	coding	ERCC5	NM_000123.4	c.1115_1118del	p.Arg372ThrfsTer6	Pathogenic	Xeroderma_pigmentosum\x2c_group_G	RCV000018042.25	rs786200919	.	.	.	1.65e-05	8.14e-06
13	102862263	102862266	AGGA	-	frameshift_variant	coding	BIVM-ERCC5	NM_001204425.2	c.2477_2480del	p.Arg826ThrfsTer6	Pathogenic	Xeroderma_pigmentosum\x2c_group_G	RCV000018042.25	rs786200919	.	.	.	1.65e-05	8.14e-06
13	32332716	32332716	T	-	frameshift_variant	coding	BRCA2	NM_000059.4	c.1238del	p.Leu413HisfsTer17	Pathogenic	Breast-ovarian_cancer\x2c_familial_2|Familial_cancer_of_breast|Hereditary_cancer-predisposing_syndrome	RCV000031312.6|RCV000043764.3|RCV000131980.3	rs80359271	.	.	.	.	.
13	32338750	32338754	ATTAC	-	frameshift_variant	coding	BRCA2	NM_000059.4	c.4398_4402del	p.Leu1466PhefsTer2	Pathogenic	Hereditary_breast_and_ovarian_cancer_syndrome|Breast-ovarian_cancer\x2c_familial_2|Hereditary_cancer-predisposing_syndrome|not_provided	RCV000044404.5|RCV000083104.5|RCV000131078.3|RCV000160288.3	rs80359444	.	.	.	8.39e-06	4.13e-06
13	32338768	32338769	AA	-	frameshift_variant	coding	BRCA2	NM_000059.4	c.4414_4415del	p.Lys1472GlufsTer9	Pathogenic	Breast-ovarian_cancer\x2c_familial_2|Familial_cancer_of_breast	RCV000031482.5|RCV000044409.2	rs756892415	.	.	.	8.38e-06	4.1e-06
13	32339566	32339569	TACT	-	frameshift_variant	coding	BRCA2	NM_000059.4	c.5213_5216del	p.Thr1738IlefsTer2	Pathogenic	Breast-ovarian_cancer\x2c_familial_2|Hereditary_breast_and_ovarian_cancer_syndrome|Hereditary_cancer-predisposing_syndrome	RCV000031532.6|RCV000044609.4|RCV000234881.1	rs80359493	.	.	.	8.35e-06	4.11e-06
13	32340432	32340432	-	A	frameshift_variant	coding	BRCA2	NM_000059.4	c.6079dup	p.Arg2027LysfsTer22	Pathogenic	Familial_cancer_of_breast|Breast-ovarian_cancer\x2c_familial_2|Hereditary_cancer-predisposing_syndrome	RCV000044837.2|RCV000076953.7|RCV000132018.3	rs749927339	.	.	.	8.28e-06	4.07e-06
13	32340624	32340624	A	-	frameshift_variant	coding	BRCA2	NM_000059.4	c.6269del	p.His2090LeufsTer29	Pathogenic	.	.	.	.	.	.	.	4.18e-06
13	32340890	32340890	-	A	frameshift_variant	coding	BRCA2	NM_000059.4	c.6535_6536insA	p.Val2179AspfsTer10	Pathogenic	.	.	rs80359601	.	.	.	8.31e-06	4.19e-06
13	32355269	32355270	GT	-	frameshift_variant	coding	BRCA2	NM_000059.4	c.7419_7420del	p.Cys2473Ter	Pathogenic	Breast-ovarian_cancer\x2c_familial_2|Familial_cancer_of_breast	RCV000031677.6|RCV000045206.2	rs80359651	.	.	.	.	4.07e-06
13	32357930	32357930	G	A	splice_donor_variant	coding	BRCA2	NM_000059.4	c.7805+1G>A	-	Pathogenic	Breast-ovarian_cancer\x2c_familial_2|Hereditary_breast_and_ovarian_cancer_syndrome	RCV000077411.3|RCV000239169.2	rs81002809	COSM432315;COSM432314	1(breast)	.	8.26e-06	4.07e-06
13	32394803	32394803	A	T	missense_variant	coding	BRCA2	NM_000059.4	c.9371A>T	p.Asn3124Ile	Pathogenic	Breast-ovarian_cancer\x2c_familial_2|Hereditary_breast_and_ovarian_cancer_syndrome|Hereditary_cancer-predisposing_syndrome|not_specified	RCV000031816.6|RCV000045802.4|RCV000130337.3|RCV000176516.3	rs28897759	.	.	.	1.65e-05	8.13e-06
13	50948037	50948037	G	T	stop_gained	coding	RNASEH2B	NM_024570.4	c.667G>T	p.Glu223Ter	Pathogenic	.	.	.	.	.	.	.	.
14	45154011	45154011	C	A	stop_gained	coding	FANCM	NM_020937.4	c.1142C>A	p.Ser381Ter	Pathogenic	.	.	.	.	.	.	.	4.06e-06
14	45175332	45175332	G	T	stop_gained	coding	FANCM	NM_020937.4	c.2578G>T	p.Glu860Ter	Pathogenic	.	.	.	.	.	.	.	4.68e-06
15	89293963	89293963	A	T	stop_gained	coding	FANCI	NM_001113378.2	c.2422A>T	p.Lys808Ter	Pathogenic/Likely_pathogenic	Fanconi_anemia\x2c_complementation_group_I	RCV000190643.1	rs375656231	.	.	.	1.65e-05	8.12e-06
15	89307474	89307474	A	T	splice_acceptor_variant	coding	FANCI	NM_001113378.2	c.3538-2A>T	-	Likely_pathogenic	.	.	.	.	.	.	.	4.08e-06
15	90754939	90754939	G	A	splice_donor_variant	coding	BLM	NM_000057.4	c.1087+1G>A	-	Likely_pathogenic	.	.	.	.	.	.	.	4.08e-06
15	90760997	90760997	G	-	frameshift_variant	coding	BLM	NM_000057.4	c.1624del	p.Asp542ThrfsTer2	Pathogenic	.	.	rs747498968	.	.	.	8.27e-06	4.12e-06
15	90769131	90769131	A	G	splice_acceptor_variant	coding	BLM	NM_000057.4	c.2308-2A>G	-	Pathogenic/Likely_pathogenic	.	.	.	.	.	.	.	4.06e-06
15	90782845	90782846	AT	-	frameshift_variant	coding	BLM	NM_000057.4	c.2580_2581del	p.His860GlnfsTer12	Pathogenic/Likely_pathogenic	Bloom_syndrome	RCV000204244.1	rs864622347	.	.	.	8.33e-06	8.13e-06
15	90790838	90790848	ATAATGAGTAA	-	splice_donor_variant,coding_sequence_variant,intron_variant	coding	BLM	NM_000057.4	c.3013_3019+4del	-	Likely_pathogenic	.	.	rs765392662	.	.	.	1.65e-05	8.13e-06
15	90794175	90794175	G	-	frameshift_variant	coding	BLM	NM_000057.4	c.3028del	p.Asp1010MetfsTer24	Pathogenic/Likely_pathogenic	Bloom_syndrome	RCV000169440.1	rs780379121	.	.	.	1.65e-05	1.64e-05
15	90811203	90811203	A	G	splice_acceptor_variant	coding	BLM	NM_000057.4	c.3875-2A>G	-	Likely_pathogenic	Bloom_syndrome	RCV000409613.1	rs150421256	.	.	.	1.65e-05	8.12e-06
16	2040044	2040044	C	-	frameshift_variant	coding	NTHL1	NM_002528.7	c.795del	p.Glu265AspfsTer68	Likely_pathogenic	.	.	.	.	.	.	.	4.12e-06
16	2043566	2043566	C	T	splice_donor_variant	coding	NTHL1	NM_002528.7	c.685+1G>A	-	Pathogenic	Familial_adenomatous_polyposis_3	RCV000202319.3	rs372946560	.	.	.	8.44e-06	4.15e-06
16	2046223	2046223	G	A	stop_gained	coding	NTHL1	NM_002528.7	c.259C>T	p.Gln87Ter	Pathogenic	.	.	rs201671098	.	.	0.0002	8.29e-06	4.07e-06
16	23607860	23607860	T	C	splice_region_variant,intron_variant	coding	PALB2	NM_024675.4	c.3350+4A>G	-	Pathogenic/Likely_pathogenic	Familial_cancer_of_breast|Fanconi_anemia\x2c_complementation_group_N|Hereditary_cancer-predisposing_syndrome|not_provided	RCV000114621.1|RCV000114622.1|RCV000213830.1|RCV000433683.1	rs180177136	.	.	.	.	4.06e-06
16	23634872	23634875	AATA	-	frameshift_variant	coding	PALB2	NM_024675.4	c.1671_1674del	p.Ile558LysfsTer2	Pathogenic	.	.	.	.	.	.	.	4.08e-06
16	23635403	23635406	AAGA	-	frameshift_variant	coding	PALB2	NM_024675.4	c.1140_1143del	p.Ser380ArgfsTer43	Pathogenic	.	.	.	.	.	.	.	8.13e-06
16	23636151	23636151	A	-	frameshift_variant	coding	PALB2	NM_024675.4	c.395del	p.Val132AlafsTer45	Pathogenic	Fanconi_anemia\x2c_complementation_group_N	RCV000114636.1	rs180177085	.	.	.	1.65e-05	8.15e-06
16	3597524	3597524	C	T	stop_gained	coding	SLX4	NM_032444.4	c.1538G>A	p.Trp513Ter	Pathogenic	.	.	rs761314760	.	.	.	8.27e-06	8.12e-06
16	3602208	3602209	CT	-	frameshift_variant	coding	SLX4	NM_032444.4	c.859_860del	p.Ser287ProfsTer34	Likely_pathogenic	.	.	.	.	.	.	.	4.06e-06
16	89738710	89738710	T	C	splice_acceptor_variant	coding	FANCA	NM_000135.4	c.4261-2A>G	-	Pathogenic	.	.	.	.	.	.	.	.
16	89738710	89738710	T	G	splice_acceptor_variant	coding	FANCA	NM_000135.4	c.4261-2A>C	-	Pathogenic	.	.	.	.	.	.	.	4.09e-06
16	89738711	89738711	G	C	splice_region_variant,intron_variant	coding	FANCA	NM_000135.4	c.4261-3C>G	-	Pathogenic	.	.	.	.	.	.	.	4.09e-06
16	89738720	89738727	GAGCAGGT	-	intron_variant	noncoding	FANCA	NM_000135.4	c.4261-19_4261-12del	-	Pathogenic	.	.	.	.	.	.	.	.
16	89740008	89740008	T	-	frameshift_variant	coding	FANCA	NM_000135.4	c.3920del	p.Gln1307ArgfsTer2	Pathogenic	.	.	.	.	.	.	.	4.06e-06
16	89742836	89742850	CCTGATGTTTTCTTC	-	inframe_deletion	coding	FANCA	NM_000135.4	c.3715_3729del	p.Glu1239_Arg1243del	Pathogenic	.	.	.	.	.	.	.	4.06e-06
16	89748654	89748654	C	T	splice_region_variant,intron_variant	coding	FANCA	NM_000135.4	c.3348+5G>A	-	Pathogenic	.	.	.	.	.	.	.	4.07e-06
16	89749878	89749878	G	A	stop_gained	coding	FANCA	NM_000135.4	c.3091C>T	p.Gln1031Ter	Pathogenic	.	.	.	.	.	.	.	4.06e-06
16	89767215	89767215	A	C	missense_variant	coding	FANCA	NM_000135.4	c.2527T>G	p.Tyr843Asp	Pathogenic	.	.	rs374030577	.	.	.	8.29e-06	4.06e-06
16	89784946	89784946	G	A	stop_gained	coding	FANCA	NM_000135.4	c.1378C>T	p.Arg460Ter	Pathogenic	.	.	.	.	.	.	.	4.06e-06
16	89810706	89810706	C	A	splice_donor_variant	coding	FANCA	NM_000135.4	c.522+1G>T	-	Likely_pathogenic	.	.	.	.	.	.	.	4.06e-06
16	89815938	89815938	A	C	stop_gained	coding	FANCA	NM_000135.4	c.128T>G	p.Leu43Ter	Likely_pathogenic	.	.	.	.	.	.	.	4.06e-06
17	35101301	35101301	C	T	stop_gained	coding	RAD51D	NM_002878.3	c.803G>A	p.Trp268Ter	Pathogenic	Breast-ovarian_cancer\x2c_familial_4	RCV000475620.1	rs750219200	.	.	.	8.24e-06	8.12e-06
17	35106385	35106385	C	T	splice_donor_variant	coding	RAD51D	NM_002878.3	c.576+1G>A	-	Pathogenic/Likely_pathogenic	Breast-ovarian_cancer\x2c_familial_4	RCV000410773.1	rs781161543	.	.	.	8.84e-06	8.21e-06
17	43045773	43045773	C	T	missense_variant	coding	BRCA1	NM_007294.4	c.5497G>A	p.Val1833Met	Pathogenic/Likely_pathogenic	Hereditary_breast_and_ovarian_cancer_syndrome|Breast-ovarian_cancer\x2c_familial_1|Hereditary_cancer-predisposing_syndrome|not_provided	RCV000049017.3|RCV000077626.4|RCV000132307.3|RCV000255915.1	rs80357268	.	.	.	.	4.07e-06
17	43049196	43049196	T	G	splice_acceptor_variant	coding	BRCA1	NM_007294.4	c.5333-2A>C	-	Pathogenic	Familial_cancer_of_breast|Breast-ovarian_cancer\x2c_familial_1\x2cFamilial_cancer_of_breast|Breast-ovarian_cancer\x2c_familial_1	RCV000048942.2|RCV000077616.2\x2cRCV000048941.2|RCV000258161.1	rs397509264	.	.	.	8.27e-06	4.06e-06
17	43063946	43063946	C	A	stop_gained	coding	BRCA1	NM_007294.4	c.5080G>T	p.Glu1694Ter	Pathogenic	Hereditary_breast_and_ovarian_cancer_syndrome|Breast-ovarian_cancer\x2c_familial_1|not_provided	RCV000048780.4|RCV000077593.5|RCV000255531.1	rs80356896	.	.	.	.	4.07e-06
17	43071169	43071169	T	-	frameshift_variant	coding	BRCA1	NM_007294.4	c.4745del	p.Asp1582AlafsTer19	Pathogenic	Familial_cancer_of_breast|Breast-ovarian_cancer\x2c_familial_1	RCV000048649.2|RCV000112393.3	rs80357907	.	.	.	.	4.06e-06
17	43090946	43090946	G	A	stop_gained,splice_region_variant	coding	BRCA1	NM_007294.4	c.4183C>T	p.Gln1395Ter	Pathogenic	Familial_cancer_of_breast|Breast-ovarian_cancer\x2c_familial_1|Hereditary_cancer-predisposing_syndrome|not_provided	RCV000048471.4|RCV000077564.9|RCV000162874.2|RCV000212181.3	rs80357260	.	.	.	.	4.21e-06
17	43090963	43090964	CT	-	frameshift_variant	coding	BRCA1	NM_007294.4	c.4165_4166del	p.Ser1389Ter	Pathogenic	Hereditary_breast_and_ovarian_cancer_syndrome|Breast-ovarian_cancer\x2c_familial_1	RCV000048463.6|RCV000077562.5	rs80357572	.	.	.	1.06e-05	4.13e-06
17	43091783	43091783	C	A	stop_gained	coding	BRCA1	NM_007294.4	c.3748G>T	p.Glu1250Ter	Pathogenic	Breast-ovarian_cancer\x2c_familial_1|Hereditary_breast_and_ovarian_cancer_syndrome|not_provided|Hereditary_cancer-predisposing_syndrome|Familial_cancer_of_breast\x2cBreast-ovarian_cancer\x2c_familial_1|not_specified|Breast_cancer|Hereditary_cancer-predisposing_syndrome|Hereditary_breast_and_ovarian_cancer_syndrome	RCV000019241.10|RCV000048311.6|RCV000074586.7|RCV000131811.3|RCV000465125.1\x2cRCV000112170.3|RCV000120296.4|RCV000148379.1|RCV000162713.1|RCV000167791.6	rs28897686	.	.	.	1.65e-05	8.13e-06
17	43092388	43092388	C	-	frameshift_variant	coding	BRCA1	NM_007294.4	c.3143del	p.Gly1048ValfsTer14	Pathogenic	Breast-ovarian_cancer\x2c_familial_1	RCV000257681.2	.	.	.	.	.	4.07e-06
17	43093193	43093193	G	A	stop_gained	coding	BRCA1	NM_007294.4	c.2338C>T	p.Gln780Ter	Pathogenic	Hereditary_breast_and_ovarian_cancer_syndrome|Breast-ovarian_cancer\x2c_familial_1|Hereditary_cancer-predisposing_syndrome|not_provided\x2cBreast-ovarian_cancer\x2c_familial_1|Hereditary_cancer-predisposing_syndrome|Hereditary_breast_and_ovarian_cancer_syndrome\x2cFamilial_cancer_of_breast|Breast-ovarian_cancer\x2c_familial_1	RCV000047805.4|RCV000077515.6|RCV000162854.2|RCV000414114.1\x2cRCV000077101.2|RCV000165128.2|RCV000199021.1\x2cRCV000047804.2|RCV000111829.1	rs80356945	.	.	.	.	4.07e-06
17	43093570	43093570	T	-	frameshift_variant	coding	BRCA1	NM_007294.4	c.1961del	p.Lys654SerfsTer47	Pathogenic	Breast-ovarian_cancer\x2c_familial_1|Hereditary_breast_and_ovarian_cancer_syndrome|Hereditary_cancer-predisposing_syndrome|not_provided|Breast_cancer	RCV000031019.9|RCV000047660.7|RCV000130764.3|RCV000236783.2|RCV000414241.1	rs80357522	COSM219054;COSM1383519;COSM1640708	1(ovary);1(stomach);1(large_intestine)	.	8.24e-06	4.07e-06
17	43106457	43106457	T	C	missense_variant,splice_region_variant	coding	BRCA1	NM_007294.4	c.211A>G	p.Arg71Gly	Pathogenic	Breast-ovarian_cancer\x2c_familial_1|not_provided|Hereditary_cancer-predisposing_syndrome|Hereditary_breast_and_ovarian_cancer_syndrome|Familial_cancer_of_breast	RCV000019263.10|RCV000047713.6|RCV000131899.4|RCV000195359.3|RCV000469732.1	rs80357382	.	.	.	.	4.09e-06
17	43106534	43106534	C	A	splice_acceptor_variant	coding	BRCA1	NM_007294.4	c.135-1G>T	-	Pathogenic	Breast-ovarian_cancer\x2c_familial_1|Hereditary_breast_and_ovarian_cancer_syndrome|Hereditary_cancer-predisposing_syndrome|not_provided\x2cHereditary_breast_and_ovarian_cancer_syndrome|Breast-ovarian_cancer\x2c_familial_1\x2cnot_provided	RCV000030985.5|RCV000047435.3|RCV000131843.2|RCV000236913.2\x2cRCV000047434.3|RCV000111858.1\x2cRCV000235787.2	rs80358158	.	.	.	8.97e-06	4.09e-06
17	58696702	58696702	G	C	missense_variant	coding	RAD51C	NM_058216.3	c.414G>C	p.Leu138Phe	Likely_pathogenic	Breast-ovarian_cancer\x2c_familial_3|Hereditary_cancer-predisposing_syndrome	RCV000007227.2|RCV000129800.2	rs267606999	.	.	.	.	4.06e-06
17	58696785	58696785	T	-	frameshift_variant	coding	RAD51C	NM_058216.3	c.498del	p.Asp167IlefsTer4	Pathogenic	.	.	rs746993675	.	.	.	8.24e-06	4.06e-06
17	58696790	58696790	A	T	stop_gained	coding	RAD51C	NM_058216.3	c.502A>T	p.Arg168Ter	Pathogenic	Hereditary_cancer-predisposing_syndrome|not_provided	RCV000129454.4|RCV000212939.1	rs587781490	.	.	.	.	4.06e-06
17	58720744	58720744	A	T	splice_acceptor_variant	coding	RAD51C	NM_058216.3	c.838-2A>T	-	Likely_pathogenic	.	.	rs748589398	.	.	.	8.42e-06	.
17	61693513	61693513	C	T	splice_acceptor_variant	coding	BRIP1	NM_032043.3	c.2493-1G>A	-	Pathogenic/Likely_pathogenic	.	.	.	COSM3520427;COSM3520426	1(skin)	.	.	4.07e-06
17	61793698	61793698	C	A	stop_gained	coding	BRIP1	NM_032043.3	c.1372G>T	p.Glu458Ter	Pathogenic	Hereditary_cancer-predisposing_syndrome|not_provided|Familial_cancer_of_breast|Fanconi_anemia\x2c_complementation_group_J	RCV000116123.6|RCV000212309.3|RCV000473135.1|RCV000473135.1	rs587780228	.	.	.	9.53e-06	4.12e-06
17	61799204	61799204	T	-	frameshift_variant	coding	BRIP1	NM_032043.3	c.1236del	p.Val413PhefsTer10	Pathogenic	Familial_cancer_of_breast|Fanconi_anemia\x2c_complementation_group_J|Hereditary_cancer-predisposing_syndrome	RCV000200575.2|RCV000200575.2|RCV000216061.1	rs863224525	.	.	.	.	4.07e-06
17	7674221	7674221	G	A	missense_variant	coding	TP53	NM_000546.6	c.742C>T	p.Arg248Trp	Pathogenic	Li-Fraumeni_syndrome_1|Hereditary_cancer-predisposing_syndrome|Li-Fraumeni_syndrome|not_provided|Acute_myeloid_leukemia|Adenocarcinoma_of_lung|Glioblastoma|Small_cell_lung_cancer|Squamous_cell_carcinoma_of_the_head_and_neck|Chronic_lymphocytic_leukemia|Brainstem_glioma|Ovarian_Serous_Cystadenocarcinoma|Myelodysplastic_syndrome|Adenocarcinoma_of_prostate|Neoplasm_of_breast|Oesophageal_carcinoma|Ad…	RCV000013140.23|RCV000115735.5|RCV000168242.5|RCV000213057.2|RCV000418495.1|RCV000419032.1|RCV000419150.1|RCV000419857.1|RCV000423184.1|RCV000423804.1|RCV000424308.1|RCV000424415.1|RCV000425083.1|RCV000425682.1|RCV000429777.1|RCV000429884.1|RCV000430543.1|RCV000431508.1|RCV000431689.1|RCV000433905.1|RCV000434504.1|RCV000435803.1|RCV000436398.1|RCV000438698.1|RCV000440422.1|RCV000440560.1|RCV00044…	rs121912651	COSM120006;COSM120005;COSM1640831;COSM10656;COSM3388183;COSM120007	1(pleura);4(vulva);32(ovary);2(bone);75(breast);1(penis);7(NS);42(haematopoietic_and_lymphoid_tissue);37(stomach);21(urinary_tract);5(soft_tissue);5(kidney);20(pancreas);5(liver);52(oesophagus);33(skin);7(prostate);20(lung);1(cervix);4(thyroid);33(upper_aerodigestive_tract);1(thymus);170(large_intestine);40(central_nervous_system);9(biliary_tract);22(endometrium)	.	8.24e-06	4.06e-06
17	7675085	7675085	C	A	missense_variant	coding	TP53	NM_000546.6	c.527G>T	p.Cys176Phe	Likely_pathogenic	Adenocarcinoma_of_prostate|Colorectal_Neoplasms|Adenocarcinoma_of_stomach|Adenocarcinoma_of_lung|Transitional_cell_carcinoma_of_the_bladder|Renal_cell_carcinoma|Neoplasm_of_breast|Pancreatic_adenocarcinoma|Squamous_cell_carcinoma_of_lung|Hepatocellular_carcinoma|Neoplasm_of_brain|Squamous_cell_carcinoma_of_the_head_and_neck|Oesophageal_carcinoma|Ovarian_Serous_Cystadenocarcinoma|Acute_myeloid_leu…	RCV000423447.1|RCV000423829.1|RCV000424063.1|RCV000424490.1|RCV000425950.1|RCV000429162.1|RCV000429805.1|RCV000431923.1|RCV000434780.1|RCV000435143.1|RCV000440448.1|RCV000440706.1|RCV000442295.1|RCV000445073.1|RCV000445093.1\x2cRCV000166045.2|RCV000255616.2|RCV000418577.1|RCV000419236.1|RCV000421421.1|RCV000422335.1|RCV000424233.1|RCV000429854.1|RCV000430147.1|RCV000430568.1|RCV000432068.1|RCV000…	.	COSM117396;COSM3378352;COSM117398;COSM1640850;COSM117397;COSM117395;COSM10645	1(salivary_gland);1(pleura);1(vulva);6(ovary);11(breast);6(bone);4(haematopoietic_and_lymphoid_tissue);18(stomach);7(urinary_tract);3(soft_tissue);4(pancreas);7(liver);2(genital_tract);26(oesophagus);2(adrenal_gland);1(skin);3(prostate);16(lung);25(upper_aerodigestive_tract);19(large_intestine);4(central_nervous_system);1(endometrium)	.	.	4.06e-06
19	12810324	12810324	G	A	missense_variant	coding	RNASEH2A	NM_006397.3	c.557G>A	p.Arg186Gln	Pathogenic/Likely_pathogenic	.	.	rs753679297	.	.	.	8.24e-06	4.06e-06
19	12813158	12813158	-	GC	frameshift_variant	coding	RNASEH2A	NM_006397.3	c.716_717dup	p.Thr240AlafsTer77	Pathogenic	Aicardi_Goutieres_syndrome_4	RCV000114340.2	rs78705193	.	.	.	.	.
19	45352208	45352208	C	-	splice_donor_variant	coding	ERCC2	NM_000400.4	c.2190+1del	-	Pathogenic	.	.	.	.	.	.	.	4.08e-06
19	45414870	45414870	G	C	missense_variant	coding	ERCC1	NM_001983.4	c.693C>G	p.Phe231Leu	Pathogenic	Cerebrooculofacioskeletal_syndrome_4|Cockayne_syndrome	RCV000018266.31|RCV000252117.1	rs121913028	.	.	.	1.65e-05	1.63e-05
22	28695771	28695771	-	A	frameshift_variant	coding	CHEK2	NM_007194.4	c.1197dup	p.Gly400TrpfsTer6	Pathogenic	.	.	.	.	.	.	.	4.07e-06
22	28695829	28695830	GA	-	frameshift_variant	coding	CHEK2	NM_007194.4	c.1139_1140del	p.Leu380HisfsTer14	Pathogenic	.	.	.	.	.	.	.	4.07e-06
22	28725062	28725062	A	-	frameshift_variant	coding	CHEK2	NM_007194.4	c.507del	p.Phe169LeufsTer2	Pathogenic	Hereditary_cancer-predisposing_syndrome|not_provided	RCV000116022.4|RCV000254658.2	rs587780183	.	.	.	8.24e-06	4.06e-06
22	28734499	28734503	GAATA	-	frameshift_variant	coding	CHEK2	NM_007194.4	c.219_223del	p.Ile74Ter	Pathogenic	.	.	rs766416564	.	.	.	8.24e-06	8.12e-06
Non-Finnish European (Southern European)
1	45332916	45332916	A	G	splice_donor_variant	coding	MUTYH	NM_001048174.2	c.420+2T>C	-	Pathogenic/Likely_pathogenic	MYH-associated_polyposis\x2cHereditary_cancer-predisposing_syndrome	RCV000196093.1\x2cRCV000132227.2	rs587782730	.	.	.	8.26e-06	4.08e-06
2	214780559	214780559	C	T	splice_donor_variant	coding	BARD1	NM_000465.4	c.1314+1G>A	-	Likely_pathogenic	.	.	rs753785671	.	.	.	8.37e-06	4.08e-06
2	214780669	214780669	G	T	stop_gained	coding	BARD1	NM_000465.4	c.1205C>A	p.Ser402Ter	Pathogenic/Likely_pathogenic	not_provided	RCV000432054.1	rs796666047	.	.	.	.	8.14e-06
2	47806603	47806603	-	A	frameshift_variant	coding	MSH6	NM_000179.3	c.3957dup	p.Ala1320SerfsTer5	Pathogenic	.	.	rs587779297	.	.	.	8.41e-06	4.1e-06
3	10042585	10042587	GTC	-	inframe_deletion	coding	FANCD2	NM_001018115.3	c.813_815del	p.Ser272del	Pathogenic	.	.	rs748327074	.	.	.	8.24e-06	4.06e-06
3	37028782	37028782	A	G	splice_acceptor_variant	coding	MLH1	NM_000249.4	c.1410-2A>G	-	Likely_pathogenic	.	.	rs746536721	.	.	.	2.47e-05	1.22e-05
5	132575845	132575845	A	-	frameshift_variant	coding	RAD50	NM_005732.4	c.282del	p.Ile94MetfsTer36	Pathogenic	.	.	.	.	.	.	.	4.06e-06
5	132588819	132588819	-	T	frameshift_variant	coding	RAD50	NM_005732.4	c.1188dup	p.His397SerfsTer21	Pathogenic	.	.	rs770082735	.	.	.	1.66e-05	8.13e-06
5	176908695	176908695	C	T	splice_acceptor_variant	coding	UIMC1	NM_001199298.2	c.1677-1G>A	-	Likely_pathogenic	.	.	rs766633588	.	.	.	8.29e-06	4.13e-06
5	80656428	80656431	AAGA	-	frameshift_variant	coding	MSH3	NM_002439.5	c.260_263del	p.Lys87ArgfsTer14	Pathogenic	.	.	rs756190979	.	.	.	8.24e-06	4.06e-06
7	5982875	5982875	T	-	frameshift_variant	coding	PMS2	NM_000535.7	c.2123del	p.Asn708ThrfsTer17	Pathogenic	.	.	rs781078805	.	.	.	1.4e-05	4.36e-06
7	5989822	5989825	CTGA	-	frameshift_variant	coding	PMS2	NM_000535.7	c.1119_1122del	p.Gln374SerfsTer10	Pathogenic	.	.	rs757679199	.	.	.	1.65e-05	8.13e-06
7	5989877	5989877	T	-	frameshift_variant	coding	PMS2	NM_000535.7	c.1067del	p.Lys356ArgfsTer4	Pathogenic	Hereditary_cancer-predisposing_syndrome	RCV000129239.2	rs587781395	.	.	.	8.24e-06	4.06e-06
7	5991972	5991972	C	A	splice_donor_variant	coding	PMS2	NM_000535.7	c.988+1G>T	-	Likely_pathogenic	.	.	rs757110564	.	.	.	8.46e-06	4.07e-06
8	89943368	89943368	T	G	splice_acceptor_variant	coding	NBN	NM_002485.5	c.2071-2A>C	-	Likely_pathogenic	.	.	rs775397477	.	.	.	8.25e-06	4.07e-06
8	89980806	89980806	-	C	frameshift_variant	coding	NBN	NM_002485.5	c.407dup	p.Gly137ArgfsTer24	Pathogenic	.	.	rs747462107	.	.	.	8.24e-06	4.06e-06
8	89981513	89981514	TC	-	frameshift_variant	coding	NBN	NM_002485.5	c.181_182del	p.Asp61Ter	Pathogenic/Likely_pathogenic	Hereditary_cancer-predisposing_syndrome	RCV000166151.1	rs768378152	.	.	.	8.26e-06	4.06e-06
9	35075682	35075682	G	-	frameshift_variant	coding	FANCG	NM_004629.2	c.1216del	p.Gln406ArgfsTer9	Pathogenic	.	.	rs758423821	.	.	.	8.28e-06	4.08e-06
9	35079243	35079243	T	A	splice_acceptor_variant	coding	FANCG	NM_004629.2	c.85-2A>T	-	Pathogenic	.	.	rs759590778	.	.	.	2.49e-05	8.62e-06
9	95107211	95107212	GA	-	frameshift_variant	coding	FANCC	NM_000136.3	c.1387_1388del	p.Ala464ProfsTer53	Pathogenic/Likely_pathogenic	Hereditary_cancer-predisposing_syndrome	RCV000160469.1	rs730881710	.	.	.	8.34e-06	4.06e-06
9	95117318	95117318	G	A	stop_gained	coding	FANCC	NM_000136.3	c.1069C>T	p.Gln357Ter	Pathogenic	.	.	rs759900071	.	.	.	8.36e-06	4.06e-06
9	95125136	95125136	G	A	stop_gained	coding	FANCC	NM_000136.3	c.946C>T	p.Gln316Ter	Pathogenic	.	.	rs776529713	.	.	.	8.24e-06	4.06e-06
9	95135381	95135381	T	A	stop_gained	coding	FANCC	NM_000136.3	c.808A>T	p.Arg270Ter	Likely_pathogenic	.	.	rs776054094	.	.	.	8.26e-06	4.06e-06
10	14932853	14932853	C	-	splice_donor_variant	coding	DCLRE1C	NM_001033855.3	c.780+1del	-	Pathogenic	Severe_combined_immunodeficiency_with_sensitivity_to_ionizing_radiation	RCV000004935.4	rs786205074	.	.	.	1.65e-05	8.12e-06
11	108267204	108267204	-	A	frameshift_variant	coding	ATM	NM_000051.4	c.2502dup	p.Val835SerfsTer7	Pathogenic	Hereditary_cancer-predisposing_syndrome|not_provided|Ataxia-telangiectasia_syndrome	RCV000115156.5|RCV000235098.1|RCV000410349.1	rs587779822	.	.	.	.	4.06e-06
11	108293479	108293490	TAATAAAAATTT	-	splice_donor_variant,intron_variant	coding	ATM	NM_000051.4	c.4776+2_4776+13del	-	Pathogenic/Likely_pathogenic	.	.	rs762838462	.	.	.	8.3e-06	4.09e-06
11	108325385	108325392	TTTTAGTT	-	frameshift_variant	coding	ATM	NM_000051.4	c.6650_6657del	p.Phe2217SerfsTer29	Pathogenic	Ataxia-telangiectasia_syndrome|Hereditary_cancer-predisposing_syndrome	RCV000206192.1|RCV000218379.1	rs864622326	.	.	.	8.24e-06	4.07e-06
11	108327665	108327668	TACA	-	frameshift_variant	coding	ATM	NM_000051.4	c.7000_7003del	p.Tyr2334GlnfsTer4	Pathogenic/Likely_pathogenic	Hereditary_cancer-predisposing_syndrome|Ataxia-telangiectasia_syndrome	RCV000166719.2|RCV000232032.1	rs786203421	.	.	.	1.68e-05	8.14e-06
11	108343231	108343234	CTCT	-	frameshift_variant	coding	ATM	NM_000051.4	c.8281_8284del	p.Gln2762GlufsTer43	Pathogenic	.	.	rs775899653	.	.	.	8.24e-06	4.06e-06
11	65720062	65720062	G	A	missense_variant	coding	RNASEH2C	NM_032193.4	c.451C>T	p.Pro151Ser	Pathogenic	.	.	rs78464826	.	.	.	8.27e-06	4.07e-06
13	102866739	102866739	T	-	frameshift_variant	coding	BIVM-ERCC5	NM_001204425.2	c.3789del	p.Asp1263GlufsTer24	Likely_pathogenic	.	.	rs777455688	.	.	.	8.25e-06	4.06e-06
13	102866739	102866739	T	-	frameshift_variant	coding	ERCC5	NM_000123.4	c.2427del	p.Asp809GlufsTer24	Likely_pathogenic	.	.	rs777455688	.	.	.	8.25e-06	4.06e-06
13	32333149	32333149	A	-	frameshift_variant	coding	BRCA2	NM_000059.4	c.1672del	p.Ile558LeufsTer15	Pathogenic	Familial_cancer_of_breast|Breast-ovarian_cancer\x2c_familial_2	RCV000043859.2|RCV000241089.2	rs746833622	.	.	.	8.26e-06	4.06e-06
13	32337006	32337009	CAGA	-	frameshift_variant	coding	BRCA2	NM_000059.4	c.2653_2656del	p.Asp885MetfsTer9	Pathogenic	Familial_cancer_of_breast|Breast-ovarian_cancer\x2c_familial_2|Hereditary_cancer-predisposing_syndrome	RCV000044033.2|RCV000113073.3|RCV000162913.2	rs80359340	COSM5547706;COSM5547705	1(prostate)	.	1.67e-05	8.92e-06
13	32338633	32338633	-	T	frameshift_variant	coding	BRCA2	NM_000059.4	c.4284dup	p.Gln1429SerfsTer9	Pathogenic	Breast-ovarian_cancer\x2c_familial_2|Hereditary_breast_and_ovarian_cancer_syndrome|Hereditary_cancer-predisposing_syndrome|not_provided	RCV000031473.11|RCV000044387.6|RCV000130074.4|RCV000160287.3	rs80359440	.	.	.	.	.
13	32339244	32339244	C	G	stop_gained	coding	BRCA2	NM_000059.4	c.4889C>G	p.Ser1630Ter	Pathogenic	Familial_cancer_of_breast|Breast-ovarian_cancer\x2c_familial_2\x2cHereditary_breast_and_ovarian_cancer_syndrome|Breast-ovarian_cancer\x2c_familial_2|Hereditary_cancer-predisposing_syndrome|not_provided	RCV000044511.2|RCV000257254.1\x2cRCV000044512.3|RCV000077340.6|RCV000131080.2|RCV000255089.2	rs80358711	.	.	.	1.67e-05	8.18e-06
13	32340128	32340128	C	T	stop_gained	coding	BRCA2	NM_000059.4	c.5773C>T	p.Gln1925Ter	Pathogenic	Hereditary_cancer-predisposing_syndrome\x2cFamilial_cancer_of_breast|Breast-ovarian_cancer\x2c_familial_2	RCV000129311.2\x2cRCV000044750.2|RCV000113482.2	rs80358806	.	.	.	8.26e-06	4.07e-06
13	32346896	32346896	G	C	missense_variant,splice_region_variant	coding	BRCA2	NM_000059.4	c.7007G>C	p.Arg2336Pro	Pathogenic	Fanconi_anemia\x2c_complementation_group_D1|Breast-ovarian_cancer\x2c_familial_2|Hereditary_breast_and_ovarian_cancer_syndrome|Hereditary_cancer-predisposing_syndrome|not_provided|not_specified|Familial_cancer_of_breast\x2cHereditary_breast_and_ovarian_cancer_syndrome|Breast-ovarian_cancer\x2c_familial_2|Hereditary_cancer-predisposing_syndrome|not_provided|Familial_cancer_of_breast\x2cHereditary_…	RCV000009923.4|RCV000031659.5|RCV000045112.5|RCV000131031.3|RCV000174440.4|RCV000259151.1|RCV000475925.1\x2cRCV000045113.3|RCV000077394.3|RCV000214499.1|RCV000256059.1|RCV000475905.1\x2cRCV000045114.3|RCV000113685.1|RCV000219635.1	rs28897743	.	.	.	.	4.13e-06
13	32370531	32370531	-	T	frameshift_variant	coding	BRCA2	NM_000059.4	c.8463dup	p.Ile2822TyrfsTer23	Pathogenic	Familial_cancer_of_breast|Breast-ovarian_cancer\x2c_familial_2	RCV000045527.2|RCV000241216.2	rs780299355	.	.	.	8.24e-06	4.06e-06
13	32398280	32398283	AGAA	-	frameshift_variant	coding	BRCA2	NM_000059.4	c.9770_9773del	p.Lys3257ArgfsTer17	Pathogenic	Hereditary_cancer-predisposing_syndrome|Breast-ovarian_cancer\x2c_familial_2	RCV000130006.2|RCV000241331.1	rs752806191	.	.	.	8.24e-06	4.06e-06
14	67823627	67823627	G	A	splice_region_variant,synonymous_variant	coding	RAD51B	NM_001321818.1	c.84G>A	p.Gln28=	Likely_pathogenic	Hereditary_breast_and_ovarian_cancer_syndrome	RCV000416925.1	rs764896402	.	.	.	8.29e-06	4.11e-06
15	90794311	90794311	G	C	missense_variant	coding	BLM	NM_000057.4	c.3164G>C	p.Cys1055Ser	Pathogenic/Likely_pathogenic	Bloom_syndrome	RCV000034904.1	rs367543029	.	.	.	1.67e-05	8.2e-06
15	90803637	90803638	TT	-	frameshift_variant	coding	BLM	NM_000057.4	c.3475_3476del	p.Leu1159IlefsTer6	Pathogenic/Likely_pathogenic	Bloom_syndrome	RCV000034910.1	rs367543033	.	.	.	.	4.06e-06
16	13947661	13947661	C	A	missense_variant	coding	ERCC4	NM_005236.3	c.2065C>A	p.Arg689Ser	Likely_pathogenic	Fanconi_anemia\x2c_complementation_group_Q	RCV000049245.28	rs149364215	.	.	.	1.65e-05	8.12e-06
16	1497457	1497457	C	T	missense_variant	coding	TELO2	NM_016111.4	c.779C>T	p.Pro260Leu	Pathogenic	You-Hoover-Fong_syndrome	RCV000225304.2	rs369656775	.	.	.	.	5.6e-06
16	23603591	23603594	AAGT	-	frameshift_variant	coding	PALB2	NM_024675.4	c.3426_3429del	p.Leu1142PhefsTer20	Pathogenic/Likely_pathogenic	not_provided|Hereditary_cancer-predisposing_syndrome	RCV000133486.1|RCV000165289.3	rs751415161	.	.	.	8.24e-06	4.06e-06
16	23629870	23629870	-	AGCAAGTTGGGGTGTGC	frameshift_variant	coding	PALB2	NM_024675.4	c.2267_2283dup	p.His762AlafsTer8	Pathogenic/Likely_pathogenic	not_provided|Hereditary_cancer-predisposing_syndrome|Familial_cancer_of_breast	RCV000235770.1|RCV000454296.1|RCV000461617.1	rs755471995	.	.	.	8.24e-06	4.06e-06
16	3582617	3582617	-	C	frameshift_variant	coding	SLX4	NM_032444.4	c.5229dup	p.Gln1744AlafsTer34	Pathogenic/Likely_pathogenic	.	.	rs781479923	.	.	.	8.31e-06	4.08e-06
16	89752137	89752137	C	T	splice_donor_variant	coding	FANCA	NM_000135.4	c.3066+1G>A	-	Pathogenic	Fanconi_anemia\x2c_complementation_group_A	RCV000144483.1	rs587783028	.	.	.	8.24e-06	4.06e-06
16	89782938	89782938	T	C	intron_variant	noncoding	FANCA	NM_000135.4	c.1567-20A>G	-	Pathogenic	.	.	rs775154397	.	.	.	8.24e-06	4.06e-06
16	89791495	89791495	G	A	stop_gained	coding	FANCA	NM_000135.4	c.1267C>T	p.Gln423Ter	Likely_pathogenic	.	.	rs774026652	.	.	.	8.32e-06	4.07e-06
16	89805279	89805279	C	T	splice_donor_variant	coding	FANCA	NM_000135.4	c.709+1G>A	-	Pathogenic	.	.	rs753211631	.	.	.	8.6e-06	4.11e-06
17	43045784	43045784	-	C	frameshift_variant	coding	BRCA1	NM_007294.4	c.5485dup	p.Glu1829GlyfsTer51	Pathogenic	Breast-ovarian_cancer\x2c_familial_1	RCV000241000.2	rs768401297	.	.	.	8.24e-06	4.07e-06
17	43076488	43076488	C	A	missense_variant,splice_region_variant	coding	BRCA1	NM_007294.4	c.4484G>T	p.Arg1495Met	Pathogenic	Breast-ovarian_cancer\x2c_familial_1|Hereditary_breast_and_ovarian_cancer_syndrome|Hereditary_cancer-predisposing_syndrome|not_provided|not_specified|Familial_cancer_of_breast\x2cnot_provided|Breast-ovarian_cancer\x2c_familial_1\x2cBreast-ovarian_cancer\x2c_familial_1|Familial_cancer_of_breast|Hereditary_cancer-predisposing_syndrome	RCV000031179.6|RCV000048576.6|RCV000131886.3|RCV000159992.3|RCV000238601.1|RCV000462940.1\x2cRCV000236135.1|RCV000258262.1\x2cRCV000031178.6|RCV000048575.2|RCV000162878.2	rs80357389	.	.	.	8.24e-06	4.07e-06
17	43091523	43091532	ACTCAGACCA	-	frameshift_variant	coding	BRCA1	NM_007294.4	c.3999_4008del	p.Gly1334ThrfsTer29	Pathogenic	Breast-ovarian_cancer\x2c_familial_1	RCV000241051.1	rs754792932	.	.	.	8.24e-06	4.07e-06
17	43093262	43093262	C	-	frameshift_variant	coding	BRCA1	NM_007294.4	c.2269del	p.Val757PhefsTer8	Pathogenic	Breast-ovarian_cancer\x2c_familial_1|Familial_cancer_of_breast|Hereditary_cancer-predisposing_syndrome	RCV000031040.6|RCV000047779.2|RCV000215693.1	rs80357583	COSM23943	2(ovary)	.	1.65e-05	4.07e-06
17	43115720	43115723	ACTT	-	splice_region_variant,intron_variant	coding	BRCA1	NM_007294.4	c.134+3_134+6del	-	Pathogenic	Familial_cancer_of_breast|Breast-ovarian_cancer\x2c_familial_1	RCV000047431.2|RCV000258296.1	rs397508858	.	.	.	9.11e-06	4.08e-06
17	58694999	58695003	AAACC	-	frameshift_variant	coding	RAD51C	NM_058216.3	c.216_220del	p.Pro73IlefsTer6	Pathogenic	Hereditary_cancer-predisposing_syndrome	RCV000165425.1	rs786202563	.	.	.	.	4.06e-06
17	58695189	58695189	G	A	missense_variant,splice_region_variant	coding	RAD51C	NM_058216.3	c.404G>A	p.Cys135Tyr	Likely_pathogenic	Hereditary_cancer-predisposing_syndrome|Fanconi_anemia\x2c_complementation_group_O	RCV000217463.1|RCV000458645.1	rs767796996	.	.	.	8.54e-06	4.14e-06
17	58732548	58732550	AGT	-	splice_region_variant,intron_variant	coding	RAD51C	NM_058216.3	c.1026+5_1026+7del	-	Pathogenic/Likely_pathogenic	Hereditary_cancer-predisposing_syndrome|Fanconi_anemia\x2c_complementation_group_O|not_provided|Breast-ovarian_cancer\x2c_familial_3	RCV000116170.7|RCV000197293.4|RCV000235204.2|RCV000456115.1	rs747311993	.	.	.	2.47e-05	1.22e-05
17	61684099	61684099	T	-	frameshift_variant	coding	BRIP1	NM_032043.3	c.2947del	p.Ile983LeufsTer2	Pathogenic/Likely_pathogenic	.	.	.	.	.	.	.	4.07e-06
22	28695737	28695737	C	T	stop_gained	coding	CHEK2	NM_007194.4	c.1232G>A	p.Trp411Ter	Pathogenic/Likely_pathogenic	not_provided|Hereditary_cancer-predisposing_syndrome|Familial_cancer_of_breast	RCV000220219.2|RCV000448496.1|RCV000465371.1	rs371418985	.	.	.	1.68e-05	8.16e-06
22	28734702	28734708	ACATCCG	-	frameshift_variant	coding	CHEK2	NM_007194.4	c.14_20del	p.Ser5LeufsTer54	Pathogenic/Likely_pathogenic	Hereditary_cancer-predisposing_syndrome	RCV000220544.1	rs757016287	.	.	.	8.34e-06	4.16e-06
Non-Finnish European (Swedish European)
2	127286772	127286772	G	A	stop_gained	coding	ERCC3	NM_000122.2	c.1273C>T	p.Arg425Ter	Pathogenic	Xeroderma_pigmentosum\x2c_complementation_group_b	RCV000018053.28	rs121913047	.	.	.	1.65e-05	8.12e-06
2	47799229	47799229	-	T	frameshift_variant	coding	MSH6	NM_000179.3	c.1248dup	p.Lys417Ter	Pathogenic	.	.	rs778555956	COSM245780	1(prostate)	.	8.24e-06	4.06e-06
2	47799329	47799329	T	C	missense_variant	coding	MSH6	NM_000179.3	c.1346T>C	p.Leu449Pro	Pathogenic	Lynch_syndrome	RCV000074651.2	rs63750741	.	.	.	1.65e-05	1.22e-05
2	47799853	47799853	G	-	frameshift_variant	coding	MSH6	NM_000179.3	c.1871del	p.Gly624AlafsTer11	Pathogenic	.	.	rs777159874	.	.	.	8.31e-06	4.07e-06
2	47800761	47800761	-	A	frameshift_variant	coding	MSH6	NM_000179.3	c.2779dup	p.Ile927AsnfsTer8	Pathogenic	Hereditary_cancer-predisposing_syndrome|not_provided	RCV000131134.2|RCV000218611.2	rs763978082	.	.	.	8.28e-06	8.14e-06
2	47806202	47806202	A	C	splice_acceptor_variant	coding	MSH6	NM_000179.3	c.3647-2A>C	-	Pathogenic	Lynch_syndrome	RCV000074903.2	rs267608111	.	.	.	8.3e-06	4.07e-06
2	47806254	47806257	AAAG	-	frameshift_variant	coding	MSH6	NM_000179.3	c.3699_3702del	p.Lys1233AsnfsTer6	Pathogenic	Lynch_syndrome|Hereditary_cancer-predisposing_syndrome|not_provided	RCV000030271.3|RCV000128914.3|RCV000202074.3	rs267608115	.	.	.	8.25e-06	4.07e-06
3	10043065	10043065	C	T	missense_variant	coding	FANCD2	NM_001018115.3	c.904C>T	p.Arg302Trp	Pathogenic/Likely_pathogenic	Fanconi_anemia\x2c_complementation_group_D2	RCV000012820.2	rs121917787	COSM5939099;COSM5939100	1(skin)	.	1.65e-05	8.13e-06
3	14156474	14156474	G	A	stop_gained	coding	XPC	NM_004628.5	c.1894C>T	p.Gln632Ter	Pathogenic	.	.	rs3731139	.	.	.	8.28e-06	4.06e-06
5	132579868	132579868	-	A	frameshift_variant	coding	RAD50	NM_005732.4	c.561dup	p.Ala188SerfsTer30	Pathogenic/Likely_pathogenic	Hereditary_cancer-predisposing_syndrome|Nijmegen_breakage_syndrome-like_disorder	RCV000226081.2|RCV000411533.1	rs774886464	.	.	.	8.48e-06	4.08e-06
5	132588749	132588749	C	T	stop_gained	coding	RAD50	NM_005732.4	c.1114C>T	p.Gln372Ter	Pathogenic	not_provided	RCV000114865.1	rs104895046	.	.	.	8.25e-06	4.07e-06
5	132589676	132589682	GAGATAA	-	frameshift_variant	coding	RAD50	NM_005732.4	c.1300_1306del	p.Asp434LysfsTer7	Pathogenic	Hereditary_cancer-predisposing_syndrome	RCV000218400.1	rs774833591	.	.	.	1.7e-05	4.09e-06
5	132595629	132595629	G	T	stop_gained	coding	RAD50	NM_005732.4	c.2026G>T	p.Glu676Ter	Pathogenic	Hereditary_cancer-predisposing_syndrome	RCV000234381.1	rs773761143	COSM1671864;COSM1671865	2(central_nervous_system)	.	0.0003	0.0001
5	80670310	80670310	G	A	splice_donor_variant	coding	MSH3	NM_002439.5	c.792+1G>A	-	Likely_pathogenic	.	.	rs749929790	.	.	.	8.29e-06	4.07e-06
5	80725531	80725532	AG	-	frameshift_variant	coding	MSH3	NM_002439.5	c.1421_1422del	p.Glu474ValfsTer8	Pathogenic	.	.	rs778610412	.	.	.	8.24e-06	4.06e-06
7	5986826	5986826	T	A	stop_gained	coding	PMS2	NM_000535.7	c.1939A>T	p.Lys647Ter	Pathogenic	Lynch_syndrome|Hereditary_cancer-predisposing_syndrome|not_provided	RCV000076836.2|RCV000128864.2|RCV000414304.1	rs201451115	.	.	.	8.24e-06	.
7	5999126	5999127	AG	-	frameshift_variant	coding	PMS2	NM_000535.7	c.686_687del	p.Ser229CysfsTer19	Pathogenic	Lynch_syndrome	RCV000459758.1	rs746766787	.	.	.	8.24e-06	4.06e-06
7	5999200	5999200	G	A	stop_gained	coding	PMS2	NM_000535.7	c.613C>T	p.Gln205Ter	Pathogenic	.	.	rs758250810	.	.	.	8.24e-06	4.06e-06
8	89953449	89953449	G	-	frameshift_variant	coding	NBN	NM_002485.5	c.1640del	p.Ser547Ter	Likely_pathogenic	Microcephaly\x2c_normal_intelligence_and_immunodeficiency	RCV000412165.1	rs776417262	.	.	.	8.24e-06	4.07e-06
8	89971292	89971292	T	C	splice_acceptor_variant	coding	NBN	NM_002485.5	c.585-2A>G	-	Likely_pathogenic	.	.	rs772005832	.	.	.	8.61e-06	4.09e-06
8	89982804	89982805	TT	-	frameshift_variant	coding	NBN	NM_002485.5	c.88_89del	p.Asn30LeufsTer6	Pathogenic/Likely_pathogenic	Hereditary_cancer-predisposing_syndrome|Microcephaly\x2c_normal_intelligence_and_immunodeficiency	RCV000129902.2|RCV000411130.1	rs587781718	.	.	.	8.24e-06	4.06e-06
8	89982833	89982833	A	-	frameshift_variant	coding	NBN	NM_002485.5	c.60del	p.Gly21AlafsTer14	Pathogenic	.	.	rs758708229	.	.	.	1.65e-05	8.13e-06
9	35077401	35077402	TG	-	splice_acceptor_variant,intron_variant	coding	FANCG	NM_004629.2	c.511-3_511-2del	-	Likely_pathogenic	.	.	rs796572236	.	.	.	8.24e-06	4.06e-06
9	95150074	95150074	G	A	stop_gained	coding	FANCC	NM_000136.3	c.535C>T	p.Arg179Ter	Pathogenic/Likely_pathogenic	not_provided	RCV000224844.1	rs769039987	.	.	.	1.66e-05	8.13e-06
9	97687174	97687175	CT	-	frameshift_variant	coding	XPA	NM_000380.4	c.476_477del	p.Glu159AlafsTer4	Likely_pathogenic	.	.	rs781195170	.	.	.	8.27e-06	4.08e-06
10	49530716	49530716	T	-	splice_region_variant,intron_variant	coding	ERCC6	NM_000124.4	c.543+4del	-	Pathogenic	Cockayne_syndrome_B	RCV000132720.1	rs527236039	.	.	.	1.65e-05	4.07e-06
11	108244975	108244975	C	T	stop_gained	coding	ATM	NM_000051.4	c.850C>T	p.Gln284Ter	Pathogenic	.	.	rs757782702	COSM5490669;COSM5490670	1(biliary_tract)	.	8.33e-06	4.08e-06
11	108247005	108247006	TT	-	frameshift_variant	coding	ATM	NM_000051.4	c.943_944del	p.Leu315IlefsTer2	Pathogenic	.	.	rs768024233	.	.	.	1.66e-05	8.14e-06
11	108253938	108253938	C	T	stop_gained	coding	ATM	NM_000051.4	c.2023C>T	p.Gln675Ter	Pathogenic/Likely_pathogenic	Hereditary_cancer-predisposing_syndrome|not_provided|Ataxia-telangiectasia_syndrome	RCV000215540.1|RCV000255863.1|RCV000411314.1	rs777849257	.	.	.	2.47e-05	1.22e-05
11	108268505	108268505	C	T	stop_gained	coding	ATM	NM_000051.4	c.2734C>T	p.Gln912Ter	Pathogenic	.	.	rs764409952	.	.	.	8.24e-06	4.06e-06
11	108287598	108287598	A	G	splice_acceptor_variant	coding	ATM	NM_000051.4	c.3994-2A>G	-	Pathogenic/Likely_pathogenic	Hereditary_cancer-predisposing_syndrome|Ataxia-telangiectasia_syndrome	RCV000131133.3|RCV000198837.3	rs587782276	.	.	.	3.39e-05	1.65e-05
11	108293306	108293313	TATTTAGG	-	splice_acceptor_variant,coding_sequence_variant,intron_variant	coding	ATM	NM_000051.4	c.4612-3_4616del	-	Likely_pathogenic	.	.	rs773012957	.	.	.	3.04e-05	5.38e-06
11	108293369	108293369	T	G	stop_gained	coding	ATM	NM_000051.4	c.4668T>G	p.Tyr1556Ter	Pathogenic	Hereditary_cancer-predisposing_syndrome|not_specified	RCV000218541.1|RCV000432095.1	rs766438805	.	.	.	2.5e-05	1.22e-05
11	108331554	108331558	TAATG	-	splice_donor_variant,coding_sequence_variant	coding	ATM	NM_000051.4	c.7629_7629+4del	-	Pathogenic/Likely_pathogenic	Hereditary_cancer-predisposing_syndrome|Ataxia-telangiectasia_syndrome	RCV000219911.1|RCV000476426.1	rs751497695	.	.	.	8.37e-06	4.08e-06
11	108332894	108332894	C	T	stop_gained	coding	ATM	NM_000051.4	c.7921C>T	p.Gln2641Ter	Pathogenic/Likely_pathogenic	.	.	rs769523686	COSM348329	1(lung)	.	8.31e-06	4.09e-06
11	108347347	108347347	-	T	frameshift_variant	coding	ATM	NM_000051.4	c.8655dup	p.Val2886CysfsTer10	Pathogenic	.	.	rs753961188	.	.	.	4.17e-05	1.63e-05
13	32336674	32336674	T	-	frameshift_variant	coding	BRCA2	NM_000059.4	c.2319del	p.Thr774LeufsTer9	Pathogenic	Breast-ovarian_cancer\x2c_familial_2	RCV000241344.1	rs774808238	.	.	.	8.26e-06	4.07e-06
13	32338613	32338613	G	-	frameshift_variant	coding	BRCA2	NM_000059.4	c.4258del	p.Asp1420IlefsTer28	Pathogenic	Familial_cancer_of_breast|Breast-ovarian_cancer\x2c_familial_2|Hereditary_cancer-predisposing_syndrome	RCV000044378.2|RCV000077322.7|RCV000165445.1	rs80359436	.	.	.	8.36e-06	8.32e-06
13	32338942	32338942	-	A	frameshift_variant	coding	BRCA2	NM_000059.4	c.4593dup	p.Val1532SerfsTer2	Pathogenic	Hereditary_breast_and_ovarian_cancer_syndrome|Breast-ovarian_cancer\x2c_familial_2	RCV000195630.1|RCV000238798.2	rs745456776	COSM5980469;COSM5980470	2(upper_aerodigestive_tract)	.	8.3e-06	4.07e-06
13	32339572	32339578	TTTAAGT	-	frameshift_variant	coding	BRCA2	NM_000059.4	c.5217_5223del	p.Tyr1739Ter	Pathogenic	Hereditary_breast_and_ovarian_cancer_syndrome|Breast-ovarian_cancer\x2c_familial_2|Hereditary_cancer-predisposing_syndrome|not_provided	RCV000044613.3|RCV000077350.5|RCV000131077.4|RCV000219434.2	rs80359496	.	.	.	8.34e-06	4.1e-06
13	32340108	32340109	AT	-	frameshift_variant	coding	BRCA2	NM_000059.4	c.5754_5755del	p.His1918GlnfsTer5	Pathogenic	Familial_cancer_of_breast|Breast-ovarian_cancer\x2c_familial_2	RCV000044745.2|RCV000241337.2	rs760373350	.	.	.	8.26e-06	4.07e-06
13	32340333	32340333	T	G	stop_gained	coding	BRCA2	NM_000059.4	c.5978T>G	p.Leu1993Ter	Pathogenic	Breast-ovarian_cancer\x2c_familial_2	RCV000241170.1	rs768242833	.	.	.	8.3e-06	4.07e-06
13	32340420	32340420	C	G	stop_gained	coding	BRCA2	NM_000059.4	c.6065C>G	p.Ser2022Ter	Pathogenic	Familial_cancer_of_breast|Breast-ovarian_cancer\x2c_familial_2|Hereditary_cancer-predisposing_syndrome|not_provided	RCV000044830.2|RCV000113522.3|RCV000217928.1|RCV000429027.1	rs80358843	.	.	.	8.29e-06	4.07e-06
13	32341197	32341197	G	A	splice_donor_variant	coding	BRCA2	NM_000059.4	c.6841+1G>A	-	Likely_pathogenic	.	.	rs773863936	.	.	.	8.3e-06	4.07e-06
13	32354996	32354996	-	T	frameshift_variant	coding	BRCA2	NM_000059.4	c.7147dup	p.Tyr2383LeufsTer9	Pathogenic	Hereditary_breast_and_ovarian_cancer_syndrome|Breast-ovarian_cancer\x2c_familial_2	RCV000227767.1|RCV000240985.2	rs778239573	.	.	.	8.24e-06	4.07e-06
13	32357794	32357794	-	AG	frameshift_variant	coding	BRCA2	NM_000059.4	c.7673_7674dup	p.Phe2560LeufsTer89	Pathogenic	Breast-ovarian_cancer\x2c_familial_2	RCV000241295.1	rs762910793	.	.	.	8.25e-06	4.07e-06
13	32362595	32362595	G	C	missense_variant	coding	BRCA2	NM_000059.4	c.7878G>C	p.Trp2626Cys	Pathogenic	Breast-ovarian_cancer\x2c_familial_2|Hereditary_breast_and_ovarian_cancer_syndrome|Hereditary_cancer-predisposing_syndrome|not_provided\x2cBreast-ovarian_cancer\x2c_familial_2|Hereditary_breast_and_ovarian_cancer_syndrome|Hereditary_cancer-predisposing_syndrome	RCV000031706.7|RCV000045335.3|RCV000217125.1|RCV000237084.1\x2cRCV000031707.7|RCV000045336.4|RCV000163025.2	rs80359013	.	.	.	1.65e-05	4.06e-06
13	32379811	32379812	AT	-	frameshift_variant	coding	BRCA2	NM_000059.4	c.9016_9017del	p.Tyr3006GlnfsTer11	Pathogenic	Familial_cancer_of_breast|Breast-ovarian_cancer\x2c_familial_2	RCV000045688.2|RCV000083152.7	rs80359740	.	.	.	.	4.07e-06
13	32380016	32380016	G	T	stop_gained	coding	BRCA2	NM_000059.4	c.9127G>T	p.Glu3043Ter	Pathogenic	Breast-ovarian_cancer\x2c_familial_2|Hereditary_cancer-predisposing_syndrome	RCV000077034.4|RCV000130444.3	rs398122610	.	.	.	8.38e-06	4.07e-06
13	32396974	32396975	CC	-	frameshift_variant	coding	BRCA2	NM_000059.4	c.9580_9581del	p.Pro3194AsnfsTer2	Pathogenic	Breast-ovarian_cancer\x2c_familial_2|Familial_cancer_of_breast	RCV000031832.6|RCV000045859.2	rs80359771	.	.	.	8.24e-06	4.06e-06
13	50943320	50943320	G	A	splice_acceptor_variant	coding	RNASEH2B	NM_024570.4	c.437-1G>A	-	Pathogenic	.	.	rs777313709	.	.	.	1.66e-05	8.26e-06
14	75048771	75048771	C	-	frameshift_variant	coding	MLH3	NM_001040108.2	c.885del	p.His296ThrfsTer12	Pathogenic	.	.	.	.	.	.	.	4.06e-06
15	90769518	90769518	-	A	frameshift_variant	coding	BLM	NM_000057.4	c.2488dup	p.Thr830AsnfsTer5	Pathogenic/Likely_pathogenic	Bloom_syndrome	RCV000035005.1	rs772909011	.	.	.	1.65e-05	1.22e-05
15	90790647	90790647	A	T	splice_acceptor_variant	coding	BLM	NM_000057.4	c.2824-2A>T	-	Likely_pathogenic	Bloom_syndrome	RCV000411706.1	rs745538883	.	.	.	1.65e-05	8.12e-06
16	2046270	2046270	-	C	frameshift_variant	coding	NTHL1	NM_002528.7	c.211dup	p.Ala71GlyfsTer2	Pathogenic/Likely_pathogenic	.	.	rs745671590	.	.	.	1.66e-05	8.13e-06
16	23603658	23603658	C	-	frameshift_variant	coding	PALB2	NM_024675.4	c.3362del	p.Gly1121ValfsTer3	Pathogenic/Likely_pathogenic	Familial_cancer_of_breast|Hereditary_cancer-predisposing_syndrome|not_provided	RCV000114624.7|RCV000130740.3|RCV000235614.2	rs515726117	.	.	.	8.3e-06	4.06e-06
16	23626235	23626235	C	A	splice_donor_variant	coding	PALB2	NM_024675.4	c.2748+1G>T	-	Pathogenic/Likely_pathogenic	Hereditary_cancer-predisposing_syndrome\x2cFamilial_cancer_of_breast	RCV000165555.3\x2cRCV000409294.1	rs753153576	.	.	.	8.24e-06	4.06e-06
16	23630080	23630080	G	A	stop_gained	coding	PALB2	NM_024675.4	c.2074C>T	p.Gln692Ter	Pathogenic	not_provided	RCV000133477.1	rs587776415	.	.	.	8.24e-06	4.06e-06
16	23630235	23630235	G	T	stop_gained	coding	PALB2	NM_024675.4	c.1919C>A	p.Ser640Ter	Pathogenic	Hereditary_cancer-predisposing_syndrome	RCV000214899.2	rs760094988	.	.	.	8.27e-06	4.06e-06
16	23635892	23635892	T	-	frameshift_variant	coding	PALB2	NM_024675.4	c.654del	p.Asp219ThrfsTer4	Pathogenic	Hereditary_cancer-predisposing_syndrome	RCV000129864.3	rs587781697	.	.	.	.	4.06e-06
16	89742819	89742819	A	G	missense_variant	coding	FANCA	NM_000135.4	c.3746T>C	p.Leu1249Pro	Pathogenic	.	.	rs753316789	.	.	.	2.47e-05	1.62e-05
16	89761994	89761994	T	C	missense_variant	coding	FANCA	NM_000135.4	c.2807A>G	p.Glu936Gly	Likely_pathogenic	.	.	rs766643461	.	.	.	0.0001	6.09e-05
16	89765059	89765064	AACTGA	-	inframe_deletion,splice_region_variant	coding	FANCA	NM_000135.4	c.2604_2609del	p.Gln869_Phe870del	Pathogenic	.	.	rs745864224	.	.	.	8.25e-06	4.06e-06
17	43049136	43049136	T	-	frameshift_variant	coding	BRCA1	NM_007294.4	c.5391del	p.Phe1798SerfsTer36	Pathogenic	Breast-ovarian_cancer\x2c_familial_1	RCV000241197.1	rs774988515	.	.	.	8.26e-06	4.06e-06
17	43091496	43091496	T	-	frameshift_variant	coding	BRCA1	NM_007294.4	c.4035del	p.Glu1346LysfsTer20	Pathogenic	Breast-ovarian_cancer\x2c_familial_1|Hereditary_breast_and_ovarian_cancer_syndrome|not_provided|Hereditary_cancer-predisposing_syndrome|Familial_cancer_of_breast	RCV000031141.9|RCV000048413.6|RCV000074587.7|RCV000130638.3|RCV000239274.1	rs80357711	.	.	.	4.12e-05	1.63e-05
17	43091905	43091905	A	-	frameshift_variant	coding	BRCA1	NM_007294.4	c.3626del	p.Leu1209Ter	Pathogenic	Familial_cancer_of_breast|Breast-ovarian_cancer\x2c_familial_1	RCV000048261.2|RCV000112140.5	rs80357571	.	.	.	8.26e-06	4.06e-06
17	43092478	43092478	-	TCTCA	frameshift_variant	coding	BRCA1	NM_007294.4	c.3048_3052dup	p.Asn1018MetfsTer8	Pathogenic	Breast-ovarian_cancer\x2c_familial_1|Hereditary_breast_and_ovarian_cancer_syndrome|Hereditary_cancer-predisposing_syndrome|not_provided	RCV000019262.10|RCV000048059.3|RCV000131332.3|RCV000159913.2	rs80357866	.	.	.	3.3e-05	1.63e-05
17	43093759	43093759	A	-	frameshift_variant	coding	BRCA1	NM_007294.4	c.1772del	p.Ile591LysfsTer8	Pathogenic	Familial_cancer_of_breast|Breast-ovarian_cancer\x2c_familial_1	RCV000047581.2|RCV000111678.4	rs80357901	.	.	.	8.26e-06	4.07e-06
17	43094170	43094171	CT	-	frameshift_variant	coding	BRCA1	NM_007294.4	c.1360_1361del	p.Ser454Ter	Pathogenic	Breast-ovarian_cancer\x2c_familial_1|Familial_cancer_of_breast|Hereditary_cancer-predisposing_syndrome|Hereditary_breast_and_ovarian_cancer_syndrome	RCV000030987.8|RCV000047440.3|RCV000131838.3|RCV000456126.1	rs80357969	.	.	.	1.65e-05	8.14e-06
17	43094439	43094449	AGGATTCTCTG	-	frameshift_variant	coding	BRCA1	NM_007294.4	c.1082_1092del	p.Ser361Ter	Pathogenic	Familial_cancer_of_breast|Breast-ovarian_cancer\x2c_familial_1|Hereditary_cancer-predisposing_syndrome|not_provided	RCV000047334.2|RCV000077481.6|RCV000165309.2|RCV000254901.1	rs80359880	.	.	.	2.47e-05	1.22e-05
17	43094477	43094477	C	A	stop_gained	coding	BRCA1	NM_007294.4	c.1054G>T	p.Glu352Ter	Pathogenic	Familial_cancer_of_breast|Breast-ovarian_cancer\x2c_familial_1|Hereditary_cancer-predisposing_syndrome|not_provided\x2cHereditary_breast_and_ovarian_cancer_syndrome	RCV000047319.2|RCV000111532.3|RCV000162843.1|RCV000235441.1\x2cRCV000465497.1	rs80357472	.	.	.	1.65e-05	8.13e-06
17	43099808	43099808	G	A	stop_gained	coding	BRCA1	NM_007294.4	c.514C>T	p.Gln172Ter	Pathogenic	Familial_cancer_of_breast|Breast-ovarian_cancer\x2c_familial_1	RCV000048816.2|RCV000077602.6	rs80356947	.	.	.	8.24e-06	4.06e-06
17	43115780	43115780	C	T	splice_acceptor_variant	coding	BRCA1	NM_007294.4	c.81-1G>A	-	Pathogenic/Likely_pathogenic	Familial_cancer_of_breast|Breast-ovarian_cancer\x2c_familial_1\x2cBreast-ovarian_cancer\x2c_familial_1|Hereditary_cancer-predisposing_syndrome|Hereditary_breast_and_ovarian_cancer_syndrome	RCV000049148.2|RCV000258470.1\x2cRCV000077185.3|RCV000131873.3|RCV000234498.1	rs80358018	.	.	.	9.15e-06	4.08e-06
17	58709927	58709927	T	-	frameshift_variant	coding	RAD51C	NM_058216.3	c.774del	p.Thr259LeufsTer4	Pathogenic/Likely_pathogenic	.	.	rs754367349	.	.	.	9.06e-05	4.47e-05
17	61776528	61776528	C	-	frameshift_variant	coding	BRIP1	NM_032043.3	c.1970del	p.Gly657ValfsTer31	Pathogenic	.	.	rs760782298	.	.	.	1.65e-05	8.13e-06
17	61780307	61780307	-	T	frameshift_variant	coding	BRIP1	NM_032043.3	c.1888dup	p.Thr630AsnfsTer9	Pathogenic	.	.	rs763818712	.	.	.	8.24e-06	4.06e-06
17	61859808	61859808	G	A	stop_gained	coding	BRIP1	NM_032043.3	c.193C>T	p.Gln65Ter	Pathogenic/Likely_pathogenic	.	.	rs575595017	.	.	0.0002	3.3e-05	1.22e-05
17	7673824	7673824	C	A	stop_gained	coding	TP53	NM_000546.6	c.796G>T	p.Gly266Ter	Pathogenic	.	.	.	COSM4781713;COSM297539;COSM4781714;COSM44891	2(ovary);1(pleura);1(breast);4(pancreas);2(liver);1(skin);6(lung);2(upper_aerodigestive_tract);1(large_intestine)	.	.	4.11e-06
17	7675211	7675211	A	C	missense_variant	coding	TP53	NM_000546.6	c.401T>G	p.Phe134Cys	Likely_pathogenic	Hereditary_cancer-predisposing_syndrome	RCV000214547.1	rs780442292	COSM4139891;COSM43949;COSM1582364;COSM1582363;COSM1582361;COSM1582362;COSM4139890	2(ovary);2(breast);1(haematopoietic_and_lymphoid_tissue);1(stomach);1(soft_tissue);1(pancreas);1(upper_aerodigestive_tract);1(large_intestine);1(central_nervous_system);2(biliary_tract)	.	8.29e-06	4.07e-06
19	45354759	45354759	C	T	missense_variant	coding	ERCC2	NM_000400.4	c.1636G>A	p.Glu546Lys	Likely_pathogenic	.	.	rs769146546	.	.	.	8.24e-06	4.06e-06
22	28696989	28696989	T	C	splice_acceptor_variant	coding	CHEK2	NM_007194.4	c.1009-2A>G	-	Likely_pathogenic	.	.	rs766158073	.	.	.	8.37e-06	4.07e-06
22	28710029	28710029	C	-	frameshift_variant	coding	CHEK2	NM_007194.4	c.823del	p.Glu275LysfsTer3	Pathogenic	Familial_cancer_of_breast	RCV000474863.1	rs769430546	.	.	.	8.91e-06	4.08e-06
22	28734571	28734571	G	A	stop_gained	coding	CHEK2	NM_007194.4	c.151C>T	p.Gln51Ter	Pathogenic	Hereditary_cancer-predisposing_syndrome|Familial_cancer_of_breast\x2cFamilial_cancer_of_breast	RCV000129647.2|RCV000195906.1\x2cRCV000462478.1	rs587781592	.	.	.	8.25e-06	4.06e-06

## Sheet: S3B
Supplementary Table 3B. Deleterious variants shared in 2 populations
Chr	Start	End	Ref	Alt	Consequence	Region	Symbol	Feature	HGVSc	HGVSp	ClinVar_SIG_20210501	dbSNP	1000G_ALL	ExAC_Freq	gnomAD_exome_ALL	COSMIC_ID	COSMIC_DIS	ClinVar_DIS	ClinVar_ID	Shared_ethnicity	Total
1	202335652	202335652	G	A	stop_gained	coding	UBE2T	NM_014176.4	c.103C>T	p.Arg35Ter	Pathogenic	rs767502640	.	8.24e-06	8.13e-06	COSM1231558	1(stomach);1(large_intestine)	.	.	NFE_SWE, SAS	2
1	202335751	202335751	G	C	missense_variant	coding	UBE2T	NM_014176.4	c.4C>G	p.Gln2Glu	Pathogenic	rs774357609	.	8.3e-06	4.09e-06	.	.	Fanconi_anemia\x2c_complementation_group_t	RCV000180789.3	JPN, KOR(EAS_KOR)	2
1	45331676	45331676	G	A	stop_gained	coding	MUTYH	NM_001048174.2	c.1087C>T	p.Gln363Ter	Pathogenic	rs587783057	.	8.36e-06	1.63e-05	COSM2172283	1(large_intestine)	Carcinoma_of_colon|MYH-associated_polyposis|not_provided	RCV000144635.1|RCV000410310.1|RCV000413062.1	NFE_NWE, NFE_ONF	2
1	45332080	45332080	G	A	stop_gained	coding	MUTYH	NM_001048174.2	c.856C>T	p.Gln286Ter	Pathogenic	rs587781338	.	.	1.22e-05	.	.	Hereditary_cancer-predisposing_syndrome	RCV000129103.3	CHN, NFE_NWE	2
1	45332215	45332215	G	A	missense_variant	coding	MUTYH	NM_001048174.2	c.800C>T	p.Pro267Leu	Pathogenic/Likely_pathogenic	rs374950566	.	8.29e-06	1.63e-05	.	.	Hereditary_cancer-predisposing_syndrome|not_provided|MYH-associated_polyposis	RCV000164625.2|RCV000235921.1|RCV000456980.1	NFE_NWE, NFE_ONF	2
1	45332440	45332440	G	A	stop_gained	coding	MUTYH	NM_001048174.2	c.655C>T	p.Arg219Ter	Pathogenic	rs587782885	.	.	4.08e-06	.	.	Hereditary_cancer-predisposing_syndrome|Carcinoma_of_colon|not_provided	RCV000132522.3|RCV000144630.1|RCV000236829.1	CHN, SAS	2
1	45332794	45332794	C	T	missense_variant	coding	MUTYH	NM_001048174.2	c.461G>A	p.Arg154His	Pathogenic	rs143353451	.	1.65e-05	8.12e-06	COSM175679	1(pancreas)	Hereditary_cancer-predisposing_syndrome\x2cnot_provided|MYH-associated_polyposis|Hereditary_cancer-predisposing_syndrome	RCV000164867.2\x2cRCV000160752.2|RCV000200700.2|RCV000214896.1	NFE_NWE, NFE_ONF	2
1	45332795	45332795	G	A	missense_variant	coding	MUTYH	NM_001048174.2	c.460C>T	p.Arg154Cys	Pathogenic/Likely_pathogenic	rs747993448	.	8.24e-06	4.06e-06	COSM5509691	1(biliary_tract)	Hereditary_cancer-predisposing_syndrome|MYH-associated_polyposis|not_provided	RCV000166998.2|RCV000229525.2|RCV000236750.1	JPN, NFE_SWE	2
1	45332887	45332899	CCTATTTCCCCTA	-	intron_variant	noncoding	MUTYH	NM_001048174.2	c.420+19_420+31del	-	Pathogenic/Likely_pathogenic	rs781222233	.	8.25e-06	8.14e-06	.	.	MYH-associated_polyposis	RCV000459179.1	NFE_BGR, NFE_ONF	2
1	45333472	45333472	G	A	stop_gained	coding	MUTYH	NM_001048174.2	c.205C>T	p.Arg69Ter	Pathogenic	rs138775799	.	1.65e-05	1.22e-05	COSM290186	1(large_intestine)	Hereditary_cancer-predisposing_syndrome|not_provided|MYH-associated_polyposis	RCV000129018.2|RCV000235267.1|RCV000471769.1	NFE_NWE, SAS	2
1	45333561	45333561	C	-	frameshift_variant,splice_region_variant	coding	MUTYH	NM_001048174.2	c.116del	p.Gly39AlafsTer24	Pathogenic/Likely_pathogenic	rs746449748	.	1.67e-05	1.63e-05	.	.	.	.	NFE_NWE, NFE_ONF	2
1	45334457	45334457	C	-	frameshift_variant	coding	MUTYH	NM_001048174.2	c.49del	p.Ala17ProfsTer46	Pathogenic	rs587781704	.	1.65e-05	2.03e-05	.	.	Hereditary_cancer-predisposing_syndrome	RCV000129874.3	AFR, AMR	2
1	46250097	46250097	C	A	missense_variant	coding	RAD54L	NM_003579.4	c.188C>A	p.Pro63His	Pathogenic	rs121908688	.	1.65e-05	1.22e-05	.	.	Colonic_adenocarcinoma	RCV000006568.4	NFE_NWE, NFE_SEU	2
1	46277847	46277847	C	T	missense_variant	coding	RAD54L	NM_003579.4	c.1900C>T	p.Arg634Cys	Likely_pathogenic	rs368491231	.	8.24e-06	4.06e-06	.	.	.	.	CHN, AFR	2
2	127279270	127279270	G	A	stop_gained	coding	ERCC3	NM_000122.2	c.1633C>T	p.Gln545Ter	Pathogenic	rs121913048	.	8.24e-06	4.06e-06	.	.	Xeroderma_pigmentosum\x2c_complementation_group_b	RCV000018056.28	NFE_SWE, NFE_ONF	2
2	127289763	127289763	G	A	stop_gained	coding	ERCC3	NM_000122.2	c.583C>T	p.Arg195Ter	Pathogenic	rs138385061	.	8.24e-06	1.62e-05	.	.	.	.	NFE_NWE, NFE_ONF	2
2	214769289	214769289	G	T	stop_gained	coding	BARD1	NM_000465.4	c.1338C>A	p.Tyr446Ter	Pathogenic	rs761702998	.	8.27e-06	8.13e-06	.	.	.	.	EAS_OEA, NFE_ONF	2
2	214781250	214781250	-	T	frameshift_variant	coding	BARD1	NM_000465.4	c.623dup	p.Lys209GlufsTer5	Pathogenic	rs587780033	.	1.67e-05	8.84e-06	COSM1245949;COSM1245950	1(stomach)	Hereditary_cancer-predisposing_syndrome|Familial_cancer_of_breast	RCV000115638.3|RCV000464884.1	AMR, NFE_SWE	2
2	214792327	214792327	G	A	stop_gained	coding	BARD1	NM_000465.4	c.334C>T	p.Arg112Ter	Pathogenic	rs758972589	.	8.28e-06	8.14e-06	COSM4665186;COSM4665187	1(large_intestine)	Hereditary_cancer-predisposing_syndrome|Familial_cancer_of_breast|not_provided	RCV000164507.2|RCV000233846.2|RCV000413073.1	AFR, NFE_ONF	2
2	219146736	219146736	G	A	stop_gained,splice_region_variant	coding	NHEJ1	NM_024782.3	c.532C>T	p.Arg178Ter	Pathogenic	rs118204453	.	.	8.13e-06	.	.	Severe_combined_immunodeficiency_with_microcephaly\x2c_growth_retardation\x2c_and_sensitivity_to_ionizing_radiation|not_provided	RCV000001034.2|RCV000319029.1	AMR, SAS	2
2	47475171	47475171	G	C	missense_variant	coding	MSH2	NM_000251.3	c.1906G>C	p.Ala636Pro	Pathogenic	rs63750875	.	8.24e-06	1.62e-05	.	.	Colorectal_cancer\x2c_hereditary\x2c_nonpolyposis\x2c_type_1|Lynch_syndrome|Hereditary_cancer-predisposing_syndrome|not_provided|Lynch_syndrome_I	RCV000001834.2|RCV000030245.6|RCV000130428.5|RCV000202220.3|RCV000376757.1	ASJ, NFE_ONF	2
2	47783243	47783243	C	T	stop_gained	coding	MSH6	NM_000179.3	c.10C>T	p.Gln4Ter	Pathogenic/Likely_pathogenic	rs786201042	.	.	1.67e-05	COSM3185980	1(skin)	Hereditary_cancer-predisposing_syndrome|Lynch_syndrome|not_provided|Hereditary_nonpolyposis_colorectal_cancer_type_5	RCV000162425.2|RCV000199142.5|RCV000202232.3|RCV000202528.2	NFE_NWE, NFE_ONF	2
2	47798875	47798875	C	T	stop_gained	coding	MSH6	NM_000179.3	c.892C>T	p.Arg298Ter	Pathogenic	rs146816935	.	.	8.13e-06	.	.	Lynch_syndrome|Hereditary_cancer-predisposing_syndrome|not_provided	RCV000075043.2|RCV000130865.4|RCV000149892.2	AFR, AMR	2
2	47799172	47799173	TA	-	frameshift_variant	coding	MSH6	NM_000179.3	c.1190_1191del	p.Tyr397CysfsTer3	Pathogenic	rs756896277	.	8.24e-06	8.13e-06	.	.	Lynch_syndrome|Hereditary_cancer-predisposing_syndrome	RCV000074640.2|RCV000160740.1	AMR, NFE_NWE	2
2	47800130	47800133	CAGT	-	frameshift_variant	coding	MSH6	NM_000179.3	c.2150_2153del	p.Val717AlafsTer18	Pathogenic	rs587782275	.	8.25e-06	8.14e-06	.	.	Lynch_syndrome|Hereditary_cancer-predisposing_syndrome|not_provided|Hereditary_nonpolyposis_colorectal_cancer_type_5	RCV000074720.2|RCV000162408.2|RCV000202111.3|RCV000411212.1	AMR, SAS	2
2	47800297	47800297	C	T	missense_variant	coding	MSH6	NM_000179.3	c.2314C>T	p.Arg772Trp	Pathogenic	rs63750138	.	.	8.14e-06	.	.	Hereditary_cancer-predisposing_syndrome|not_specified\x2cLynch_syndrome|Hereditary_cancer-predisposing_syndrome|not_provided	RCV000164001.1|RCV000442598.1\x2cRCV000074732.2|RCV000162422.2|RCV000218399.2	AMR, NFE_NWE	2
2	47806279	47806281	GTC	-	inframe_deletion	coding	MSH6	NM_000179.3	c.3724_3726del	p.Arg1242del	Likely_pathogenic	rs63749942	.	.	8.13e-06	.	.	Lynch_syndrome|Hereditary_cancer-predisposing_syndrome|not_provided	RCV000074918.2|RCV000129144.3|RCV000255857.1	CHN, NFE_NWE	2
2	47806606	47806609	AAGC	-	frameshift_variant	coding	MSH6	NM_000179.3	c.3959_3962del	p.Ala1320GlufsTer6	Pathogenic	rs267608123	.	8.42e-06	1.64e-05	.	.	Lynch_syndrome|Hereditary_cancer-predisposing_syndrome|Hereditary_nonpolyposis_colorectal_cancer_type_5	RCV000074956.2|RCV000215904.1|RCV000411917.1	ASJ, NFE_ONF	2
2	58160148	58160149	CT	-	frameshift_variant	coding	FANCL	NM_018062.4	c.1051_1052del	p.Ser351PhefsTer2	Pathogenic/Likely_pathogenic	rs765729177	.	5.79e-05	7.74e-05	.	.	Fanconi_anemia	RCV000469469.1	AMR, NFE_SEU	2
2	58222019	58222020	TT	-	frameshift_variant	coding	FANCL	NM_018062.4	c.296_297del	p.Gln99ArgfsTer17	Pathogenic	rs779544327	.	2.49e-05	2.03e-05	.	.	.	.	AFR, SAS	2
2	58241274	58241274	G	-	frameshift_variant	coding	FANCL	NM_018062.4	c.40del	p.Leu14CysfsTer27	Pathogenic	rs761039364	.	8.29e-06	8.13e-06	.	.	.	.	AMR, ASJ	2
3	10036340	10036340	G	A	splice_donor_variant	coding	FANCD2	NM_001018115.3	c.491+1G>A	-	Likely_pathogenic	.	.	.	1.22e-05	.	.	.	.	ASJ, NFE_NWE	2
3	10064350	10064350	C	A	splice_region_variant,intron_variant	coding	FANCD2	NM_001018115.3	c.1948-6C>A	-	Pathogenic	rs779350241	.	8.24e-06	1.22e-05	.	.	.	.	NFE_SWE, NFE_ONF	2
3	10064801	10064803	CCT	-	inframe_deletion	coding	FANCD2	NM_001018115.3	c.2097_2099del	p.Leu700del	Likely_pathogenic	rs869312805	.	.	1.22e-05	.	.	Fanconi_anemia\x2c_complementation_group_D2	RCV000210268.1	AMR, NFE_BGR	2
3	14148560	14148560	A	G	splice_donor_variant	coding	XPC	NM_004628.5	c.2420+2T>C	-	Likely_pathogenic	rs778987248	.	8.34e-06	4.07e-06	.	.	.	.	FIN, NFE_SWE	2
3	14148732	14148732	C	G	splice_acceptor_variant	coding	XPC	NM_004628.5	c.2251-1G>C	-	Pathogenic	rs754673606	.	1.66e-05	2.44e-05	.	.	Xeroderma_pigmentosum\x2c_group_C	RCV000170434.1	AFR, AMR	2
3	14164836	14164836	G	A	stop_gained	coding	XPC	NM_004628.5	c.877C>T	p.Arg293Ter	Pathogenic	rs373519125	.	2.5e-05	1.63e-05	.	.	.	.	AFR, AMR	2
3	14178567	14178567	A	G	start_lost	coding	XPC	NM_004628.5	c.2T>C	p.Met1?	Likely_pathogenic	.	.	.	2.45e-05	.	.	.	.	FIN, SAS	2
3	142459303	142459303	G	A	stop_gained	coding	ATR	NM_001184.4	c.7273C>T	p.Arg2425Ter	Likely_pathogenic	.	.	.	8.13e-06	.	.	.	.	AFR, NFE_ONF	2
3	142562422	142562423	AC	-	frameshift_variant	coding	ATR	NM_001184.4	c.979_980del	p.Val327HisfsTer3	Pathogenic	rs773937499	.	8.25e-06	8.12e-06	.	.	.	.	EAS_OEA, NFE_ONF	2
3	37000991	37000991	A	G	missense_variant	coding	MLH1	NM_000249.4	c.244A>G	p.Thr82Ala	Likely_pathogenic	rs587778998	.	8.24e-06	8.12e-06	COSM5399179	1(skin)	Lynch_syndrome|Hereditary_cancer-predisposing_syndrome	RCV000075602.3|RCV000166056.2	ASJ, NFE_BGR	2
5	132557455	132557455	T	A	splice_donor_variant	coding	RAD50	NM_005732.4	c.129+2T>A	-	Likely_pathogenic	rs748086984	.	8.25e-06	8.15e-06	.	.	Hereditary_cancer-predisposing_syndrome	RCV000216511.1	NFE_SWE, NFE_ONF	2
5	132559368	132559368	G	T	splice_donor_variant	coding	RAD50	NM_005732.4	c.213+1G>T	-	Likely_pathogenic	rs765484171	.	8.28e-06	8.16e-06	.	.	.	.	NFE_NWE, NFE_ONF	2
5	132575886	132575889	AGAC	-	frameshift_variant	coding	RAD50	NM_005732.4	c.326_329del	p.Thr109AsnfsTer20	Pathogenic/Likely_pathogenic	rs746156420	.	1.66e-05	3.25e-05	.	.	Hereditary_cancer-predisposing_syndrome	RCV000115954.5	NFE_BGR, NFE_SEU	2
5	132575916	132575916	T	-	frameshift_variant	coding	RAD50	NM_005732.4	c.354del	p.Thr119LeufsTer11	Pathogenic	rs769991580	.	1.68e-05	1.22e-05	.	.	Hereditary_cancer-predisposing_syndrome	RCV000129908.3	NFE_SWE, NFE_ONF	2
5	132579986	132579986	C	T	stop_gained	coding	RAD50	NM_005732.4	c.676C>T	p.Gln226Ter	Pathogenic	rs377429225	.	.	8.13e-06	.	.	.	.	NFE_NWE, NFE_SEU	2
5	132579997	132579997	T	-	frameshift_variant	coding	RAD50	NM_005732.4	c.687del	p.Ser229ArgfsTer6	Pathogenic/Likely_pathogenic	rs760146707	.	0.0003	0.0005	.	.	Hereditary_cancer-predisposing_syndrome|Nijmegen_breakage_syndrome-like_disorder	RCV000164362.1|RCV000409900.1	FIN, NFE_SWE	2
5	132589637	132589638	TT	-	frameshift_variant	coding	RAD50	NM_005732.4	c.1253_1254del	p.Phe418CysfsTer13	Pathogenic	.	.	.	8.67e-06	.	.	.	.	AMR, NFE_NWE	2
5	132589656	132589657	TG	-	frameshift_variant	coding	RAD50	NM_005732.4	c.1271_1272del	p.Leu424GlnfsTer7	Pathogenic	rs769047012	.	1.72e-05	8.38e-06	.	.	.	.	ASJ, NFE_NWE	2
5	132594868	132594868	G	T	splice_acceptor_variant	coding	RAD50	NM_005732.4	c.1794-1G>T	-	Likely_pathogenic	rs587781742	.	.	8.15e-06	.	.	Hereditary_cancer-predisposing_syndrome	RCV000129946.3	NFE_NWE, NFE_ONF	2
5	132595033	132595033	C	A	stop_gained	coding	RAD50	NM_005732.4	c.1958C>A	p.Ser653Ter	Pathogenic	rs587781904	.	4.14e-05	2.44e-05	.	.	Hereditary_cancer-predisposing_syndrome	RCV000130243.4	NFE_NWE, NFE_SWE	2
5	132595041	132595041	C	T	stop_gained	coding	RAD50	NM_005732.4	c.1966C>T	p.Arg656Ter	Pathogenic	.	.	.	8.15e-06	COSM1671862;COSM1671863	1(haematopoietic_and_lymphoid_tissue)	Hereditary_cancer-predisposing_syndrome	RCV000229634.1	NFE_NWE, SAS	2
5	132595719	132595719	C	T	stop_gained	coding	RAD50	NM_005732.4	c.2116C>T	p.Arg706Ter	Pathogenic	rs772468452	.	8.24e-06	8.13e-06	COSM1060682;COSM1060681	1(endometrium)	.	.	AMR, NFE_NWE	2
5	132595803	132595803	C	-	frameshift_variant	coding	RAD50	NM_005732.4	c.2202del	p.Met735Ter	Pathogenic	rs786201789	.	8.39e-06	4.16e-06	.	.	Hereditary_cancer-predisposing_syndrome	RCV000164257.4	AFR, AMR	2
5	132608717	132608717	C	T	stop_gained	coding	RAD50	NM_005732.4	c.2821C>T	p.Gln941Ter	Pathogenic	rs397507177	.	.	1.49e-05	.	.	Hereditary_cancer-predisposing_syndrome	RCV000030957.4	NFE_NWE, NFE_ONF	2
5	132616035	132616035	T	-	frameshift_variant	coding	RAD50	NM_005732.4	c.3071del	p.Leu1024Ter	Pathogenic	rs753950483	.	1.65e-05	4.07e-06	.	.	.	.	NFE_NWE, NFE_ONF	2
5	132637179	132637179	C	T	stop_gained	coding	RAD50	NM_005732.4	c.3454C>T	p.Arg1152Ter	Pathogenic	rs745797941	.	8.24e-06	8.12e-06	.	.	Hereditary_cancer-predisposing_syndrome	RCV000222027.1	NFE_SEU, SAS	2
5	132638197	132638197	C	T	stop_gained	coding	RAD50	NM_005732.4	c.3592C>T	p.Arg1198Ter	Pathogenic	rs761837416	.	8.24e-06	1.22e-05	.	.	.	.	AFR, SAS	2
5	132638203	132638203	C	T	stop_gained	coding	RAD50	NM_005732.4	c.3598C>T	p.Arg1200Ter	Pathogenic	rs750586158	.	3.3e-05	1.63e-05	.	.	Hereditary_cancer-predisposing_syndrome	RCV000164215.3	NFE_SEU, SAS	2
5	132640768	132640768	C	T	stop_gained	coding	RAD50	NM_005732.4	c.3715C>T	p.Arg1239Ter	Pathogenic/Likely_pathogenic	.	.	.	8.12e-06	.	.	Hereditary_cancer-predisposing_syndrome	RCV000222314.1	NFE_ONF, SAS	2
5	60887522	60887522	T	C	splice_acceptor_variant	coding	ERCC8	NM_000082.4	c.1042-2A>G	-	Pathogenic/Likely_pathogenic	rs372237310	.	8.24e-06	8.13e-06	.	.	.	.	NFE_NWE, NFE_SWE	2
5	60898350	60898350	C	T	missense_variant	coding	ERCC8	NM_000082.4	c.769G>A	p.Gly257Arg	Pathogenic	rs770499406	.	8.25e-06	4.06e-06	.	.	.	.	CHN, EAS_OEA	2
5	60899728	60899728	C	T	splice_acceptor_variant	coding	ERCC8	NM_000082.4	c.618-1G>A	-	Pathogenic	rs201464610	.	1.65e-05	1.22e-05	.	.	.	.	NFE_SEU, NFE_ONF	2
5	60918266	60918270	TGTAA	-	frameshift_variant,splice_region_variant	coding	ERCC8	NM_000082.4	c.394_398del	p.Leu132AsnfsTer6	Pathogenic	rs774542633	.	8.29e-06	4.08e-06	.	.	.	.	CHN, EAS_OEA	2
5	60928863	60928863	C	T	splice_donor_variant	coding	ERCC8	NM_000082.4	c.173+1G>A	-	Likely_pathogenic	.	.	.	8.14e-06	.	.	.	.	ASJ, NFE_NWE	2
5	80665358	80665358	C	T	stop_gained	coding	MSH3	NM_002439.5	c.574C>T	p.Gln192Ter	Pathogenic	rs374133543	.	2.84e-05	1.23e-05	.	.	.	.	AFR, NFE_NWE	2
5	80670220	80670220	C	T	stop_gained	coding	MSH3	NM_002439.5	c.703C>T	p.Gln235Ter	Pathogenic	rs371356175	.	1.65e-05	8.12e-06	.	.	.	.	NFE_NWE, NFE_ONF	2
5	80672320	80672323	TGTT	-	frameshift_variant	coding	MSH3	NM_002439.5	c.873_876del	p.Val292MetfsTer15	Pathogenic	rs763478027	.	1.65e-05	1.22e-05	.	.	.	.	AMR, SAS	2
5	80725451	80725451	A	G	splice_acceptor_variant	coding	MSH3	NM_002439.5	c.1341-2A>G	-	Likely_pathogenic	rs750876165	.	8.28e-06	4.07e-06	.	.	.	.	CHN, NFE_SEU	2
5	80725452	80725452	G	T	splice_acceptor_variant	coding	MSH3	NM_002439.5	c.1341-1G>T	-	Likely_pathogenic	rs61754780	.	2.48e-05	4.88e-05	.	.	.	.	AFR, SAS	2
5	80725472	80725472	C	T	stop_gained	coding	MSH3	NM_002439.5	c.1360C>T	p.Arg454Ter	Pathogenic	rs539295465	0.0002	4.13e-05	2.85e-05	.	.	.	.	KOR(EAS_KOR), AFR	2
5	80728849	80728849	A	G	splice_acceptor_variant	coding	MSH3	NM_002439.5	c.1454-2A>G	-	Likely_pathogenic	.	.	3.35e-05	1.63e-05	.	.	.	.	ICE, NFE_SWE	2
5	80768885	80768885	-	A	frameshift_variant	coding	MSH3	NM_002439.5	c.2141dup	p.Arg715GlufsTer4	Pathogenic	rs751236312	.	8.29e-06	8.14e-06	.	.	.	.	NFE_NWE, NFE_ONF	2
5	80768950	80768950	C	T	stop_gained	coding	MSH3	NM_002439.5	c.2200C>T	p.Arg734Ter	Pathogenic	rs770330684	.	8.27e-06	8.14e-06	.	.	.	.	AFR, NFE_BGR	2
5	80787564	80787564	G	A	splice_acceptor_variant	coding	MSH3	NM_002439.5	c.2436-1G>A	-	Likely_pathogenic	rs200639359	.	3.3e-05	1.63e-05	.	.	.	.	NFE_NWE, NFE_ONF	2
5	80813614	80813614	G	T	stop_gained	coding	MSH3	NM_002439.5	c.2686G>T	p.Gly896Ter	Pathogenic/Likely_pathogenic	rs777054839	.	8.24e-06	2.44e-05	.	.	.	.	NFE_BGR, NFE_ONF	2
5	80813687	80813687	C	-	frameshift_variant	coding	MSH3	NM_002439.5	c.2760del	p.Tyr921MetfsTer36	Pathogenic	rs751326348	.	1.65e-05	2.03e-05	.	.	FAMILIAL_ADENOMATOUS_POLYPOSIS_4	RCV000240520.1	NFE_NWE, NFE_ONF	2
5	83204849	83204849	C	T	stop_gained	coding	XRCC4	NM_003401.5	c.673C>T	p.Arg225Ter	Pathogenic	rs768825050	.	8.29e-06	1.22e-05	.	.	Short_stature\x2c_microcephaly\x2c_and_endocrine_dysfunction	RCV000190525.3	NFE_NWE, SAS	2
6	35455795	35455795	G	-	frameshift_variant	coding	FANCE	NM_021922.3	c.297del	p.Met99IlefsTer4	Likely_pathogenic	rs754850404	.	1.65e-05	8.12e-06	.	.	.	.	ASJ, NFE_SEU	2
6	35455919	35455919	C	T	stop_gained	coding	FANCE	NM_021922.3	c.421C>T	p.Arg141Ter	Pathogenic	rs121434506	.	8.36e-06	4.07e-06	.	.	Fanconi_anemia\x2c_complementation_group_E	RCV000009248.3	CHN, NFE_SEU	2
6	43583017	43583017	-	T	frameshift_variant	coding	POLH	NM_006502.3	c.149dup	p.Ser51GlufsTer3	Likely_pathogenic	rs752080248	.	2.53e-05	1.63e-05	.	.	.	.	NFE_NWE, NFE_ONF	2
6	43583091	43583093	TCT	-	inframe_deletion	coding	POLH	NM_006502.3	c.225_227del	p.Leu77del	Pathogenic	.	.	.	4.06e-06	.	.	.	.	NFE_NWE, NFE_ONF	2
6	43587489	43587489	G	T	stop_gained,splice_region_variant	coding	POLH	NM_006502.3	c.490G>T	p.Glu164Ter	Pathogenic/Likely_pathogenic	rs767433001	.	1.67e-05	2.44e-05	.	.	Xeroderma_pigmentosum\x2c_variant_type	RCV000251879.1	JPN, KOR(EAS_KOR)	2
6	43601052	43601052	C	G	stop_gained	coding	POLH	NM_006502.3	c.725C>G	p.Ser242Ter	Pathogenic	rs745778317	.	8.24e-06	8.12e-06	.	.	Xeroderma_pigmentosum\x2c_variant_type	RCV000243669.1	JPN, KOR(KOVA,EAS_KOR)	2
7	152660781	152660781	A	G	missense_variant,splice_region_variant	coding	XRCC2	NM_005431.2	c.41T>C	p.Leu14Pro	Pathogenic	rs757140620	.	8.37e-06	4.17e-06	.	.	.	.	CHN, EAS_OEA	2
7	5977589	5977589	G	A	missense_variant,splice_region_variant	coding	PMS2	NM_000535.7	c.2444C>T	p.Ser815Leu	Likely_pathogenic	rs587779338	.	3.37e-05	1.03e-05	COSM327136	1(haematopoietic_and_lymphoid_tissue)	Lynch_syndrome|Hereditary_cancer-predisposing_syndrome	RCV000076859.2|RCV000130249.2	AFR, SAS	2
7	5982885	5982885	C	T	missense_variant	coding	PMS2	NM_000535.7	c.2113G>A	p.Glu705Lys	Pathogenic/Likely_pathogenic	rs267608161	.	0.0001	4.05e-05	.	.	Lynch_syndrome|not_provided|Lynch_syndrome_I|Hereditary_cancer-predisposing_syndrome	RCV000076843.2|RCV000115674.2|RCV000144654.1|RCV000223542.1	AFR, NFE_SWE	2
7	5986883	5986883	G	A	stop_gained	coding	PMS2	NM_000535.7	c.1882C>T	p.Arg628Ter	Pathogenic	rs63750451	.	3.3e-05	1.62e-05	.	.	Hereditary_nonpolyposis_colorectal_cancer_type_4|Lynch_syndrome|Hereditary_cancer-predisposing_syndrome|not_provided	RCV000009823.5|RCV000076834.2|RCV000218575.1|RCV000220439.1	AMR, NFE_SWE	2
7	5995532	5995532	A	G	splice_donor_variant	coding	PMS2	NM_000535.7	c.903+2T>C	-	Likely_pathogenic	.	.	.	4.07e-06	.	.	Lynch_syndrome	RCV000230352.1	CHN, AMR	2
7	5995534	5995534	C	T	splice_region_variant,synonymous_variant	coding	PMS2	NM_000535.7	c.903G>A	p.Lys301=	Likely_pathogenic	rs267608153	.	1.66e-05	8.13e-06	.	.	Lynch_syndrome|Hereditary_cancer-predisposing_syndrome|not_provided\x2cLynch_syndrome	RCV000076896.3|RCV000215563.1|RCV000255696.1\x2cRCV000228489.1	NFE_NWE, NFE_ONF	2
7	5999116	5999116	G	A	stop_gained	coding	PMS2	NM_000535.7	c.697C>T	p.Gln233Ter	Pathogenic	rs587779343	.	8.24e-06	8.12e-06	.	.	Lynch_syndrome|Hereditary_cancer-predisposing_syndrome|not_provided\x2cHereditary_cancer-predisposing_syndrome|not_specified|Hereditary_nonpolyposis_colorectal_cancer_type_4	RCV000076881.2|RCV000115701.4|RCV000212848.1\x2cRCV000160884.3|RCV000212849.1|RCV000412005.1	NFE_NWE, NFE_SWE	2
7	6003717	6003717	-	C	frameshift_variant	coding	PMS2	NM_000535.7	c.325dup	p.Glu109GlyfsTer30	Pathogenic	rs762485848	.	2.64e-05	1.73e-05	.	.	Hereditary_cancer-predisposing_syndrome	RCV000218863.1	NFE_SWE, SAS	2
7	6004059	6004059	C	G	splice_acceptor_variant	coding	PMS2	NM_000535.7	c.164-1G>C	-	Likely_pathogenic	rs763308607	.	.	4.1e-06	.	.	Hereditary_cancer-predisposing_syndrome	RCV000165585.1	CHN, KOR(EAS_KOR)	2
7	6004059	6004059	C	T	splice_acceptor_variant	coding	PMS2	NM_000535.7	c.164-1G>A	-	Likely_pathogenic	rs763308607	.	8.3e-06	4.1e-06	.	.	Hereditary_cancer-predisposing_syndrome	RCV000165585.1	NFE_NWE, NFE_SEU	2
7	6008996	6008996	C	A	splice_donor_variant	coding	PMS2	NM_000535.7	c.23+1G>T	-	Pathogenic/Likely_pathogenic	rs587782074	.	1.68e-05	1.63e-05	.	.	Hereditary_cancer-predisposing_syndrome	RCV000130565.2	AFR, FIN	2
8	89955538	89955538	G	-	frameshift_variant	coding	NBN	NM_002485.5	c.1142del	p.Pro381GlnfsTer23	Pathogenic/Likely_pathogenic	rs587781969	.	2.58e-05	2.04e-05	.	.	Microcephaly\x2c_normal_intelligence_and_immunodeficiency|Hereditary_cancer-predisposing_syndrome|not_provided	RCV000007358.6|RCV000130355.3|RCV000220768.2	NFE_NWE, NFE_SEU	2
8	89971174	89971177	TGTT	-	frameshift_variant,splice_region_variant	coding	NBN	NM_002485.5	c.698_701del	p.Lys233SerfsTer5	Pathogenic	rs587780100	.	3.42e-05	2.04e-05	.	.	Hereditary_cancer-predisposing_syndrome|Microcephaly\x2c_normal_intelligence_and_immunodeficiency|not_provided	RCV000115804.5|RCV000193543.5|RCV000212735.1	AFR, NFE_SWE	2
8	89978325	89978325	T	A	splice_acceptor_variant	coding	NBN	NM_002485.5	c.481-2A>T	-	Likely_pathogenic	rs751567476	.	8.28e-06	1.22e-05	.	.	.	.	ASJ, NFE_NWE	2
8	89981430	89981430	G	A	stop_gained	coding	NBN	NM_002485.5	c.265C>T	p.Arg89Ter	Pathogenic/Likely_pathogenic	.	.	.	1.22e-05	.	.	Microcephaly\x2c_normal_intelligence_and_immunodeficiency	RCV000410234.1	NFE_NWE, SAS	2
8	89982736	89982737	AA	-	frameshift_variant	coding	NBN	NM_002485.5	c.156_157del	p.Ser53CysfsTer9	Pathogenic/Likely_pathogenic	rs767454740	.	8.24e-06	2.03e-05	.	.	Microcephaly\x2c_normal_intelligence_and_immunodeficiency	RCV000410370.1	AMR, NFE_NWE	2
8	94399540	94399540	C	A	missense_variant	coding	RAD54B	NM_012415.3	c.1252G>T	p.Asp418Tyr	Pathogenic	rs119490107	.	1.68e-05	2.86e-05	.	.	Carcinoma_of_colon	RCV000005993.6	JPN, KOR(EAS_KOR)	2
9	35076030	35076030	T	C	splice_acceptor_variant	coding	FANCG	NM_004629.2	c.1077-2A>G	-	Pathogenic	rs769547477	.	8.3e-06	1.63e-05	.	.	.	.	AMR, SAS	2
9	35076442	35076442	G	A	stop_gained	coding	FANCG	NM_004629.2	c.1066C>T	p.Gln356Ter	Pathogenic	rs121434426	.	.	4.06e-06	.	.	Fanconi_anemia\x2c_complementation_group_G	RCV000007107.2	JPN, AFR	2
9	35077267	35077273	GGCGGTA	-	frameshift_variant	coding	FANCG	NM_004629.2	c.637_643del	p.Tyr213LysfsTer6	Pathogenic	rs587776640	.	8.24e-06	8.12e-06	.	.	Fanconi_anemia\x2c_complementation_group_G	RCV000007111.2	AFR, SAS	2
9	35078604	35078604	C	G	splice_donor_variant	coding	FANCG	NM_004629.2	c.307+1G>C	-	Pathogenic	rs200479612	.	4.94e-05	2.44e-05	.	.	Fanconi_anemia\x2c_complementation_group_G	RCV000007106.3	JPN, KOR(EAS_KOR)	2
9	35079208	35079208	G	A	stop_gained	coding	FANCG	NM_004629.2	c.118C>T	p.Gln40Ter	Pathogenic	rs776122485	.	5.12e-05	1.7e-05	.	.	.	.	NFE_SWE, SAS	2
9	95101723	95101723	A	G	missense_variant	coding	FANCC	NM_000136.3	c.1661T>C	p.Leu554Pro	Pathogenic/Likely_pathogenic	rs104886458	.	8.33e-06	1.22e-05	.	.	Fanconi_anemia\x2c_complementation_group_C|not_provided	RCV000012823.4|RCV000058925.2	NFE_NWE, NFE_ONF	2
9	95111534	95111534	-	G	frameshift_variant	coding	FANCC	NM_000136.3	c.1257dup	p.Thr420HisfsTer15	Pathogenic/Likely_pathogenic	rs776037287	.	1.65e-05	4.06e-06	.	.	.	.	CHN, NFE_SEU	2
9	95125085	95125085	C	A	splice_donor_variant	coding	FANCC	NM_000136.3	c.996+1G>T	-	Likely_pathogenic	rs370510954	.	1.65e-05	1.22e-05	.	.	not_provided|Fanconi_anemia\x2c_complementation_group_C|Fanconi_anemia	RCV000254963.2|RCV000412116.1|RCV000458747.1	AMR, NFE_ONF	2
9	95135345	95135345	C	T	splice_donor_variant	coding	FANCC	NM_000136.3	c.843+1G>A	-	Likely_pathogenic	rs587779909	.	.	8.12e-06	.	.	Fanconi_anemia|Fanconi_anemia\x2c_complementation_group_C	RCV000204814.1|RCV000410480.1	NFE_NWE, NFE_ONF	2
9	95171110	95171113	TCTC	-	frameshift_variant	coding	FANCC	NM_000136.3	c.487_490del	p.Glu163IlefsTer30	Pathogenic/Likely_pathogenic	rs730881708	.	.	2.03e-05	.	.	not_provided|Fanconi_anemia\x2c_complementation_group_C	RCV000160466.2|RCV000410607.1	AFR, AMR	2
9	95172037	95172037	-	T	frameshift_variant,splice_region_variant	coding	FANCC	NM_000136.3	c.455dup	p.Asn152LysfsTer9	Pathogenic	rs774170058	.	2.54e-05	1.22e-05	.	.	.	.	NFE_SWE, NFE_ONF	2
9	95240655	95240655	C	T	stop_gained	coding	FANCC	NM_000136.3	c.339G>A	p.Trp113Ter	Pathogenic	.	.	.	4.07e-06	.	.	Fanconi_anemia\x2c_complementation_group_C|Fanconi_anemia	RCV000412313.1|RCV000462409.1	CHN, EAS_OEA	2
9	95249255	95249255	G	A	stop_gained	coding	FANCC	NM_000136.3	c.37C>T	p.Gln13Ter	Pathogenic/Likely_pathogenic	rs121917784	.	8.28e-06	8.14e-06	.	.	Fanconi_anemia\x2c_complementation_group_C|not_provided|Fanconi_anemia	RCV000012826.6|RCV000115351.4|RCV000476519.1	AMR, NFE_SEU	2
9	97684965	97684965	G	A	stop_gained	coding	XPA	NM_000380.4	c.631C>T	p.Arg211Ter	Pathogenic/Likely_pathogenic	rs149226993	.	8.26e-06	4.07e-06	.	.	.	.	CHN, AFR	2
9	97687096	97687096	C	G	missense_variant,splice_region_variant	coding	XPA	NM_000380.4	c.555G>C	p.Gln185His	Pathogenic/Likely_pathogenic	rs746617574	.	.	1.24e-05	.	.	.	.	NFE_NWE, NFE_ONF	2
9	97687262	97687262	C	G	splice_acceptor_variant	coding	XPA	NM_000380.4	c.390-1G>C	-	Pathogenic	rs750218942	.	2.64e-05	1.26e-05	.	.	Xeroderma_pigmentosum\x2c_type_1	RCV000246304.1	JPN, KOR(KOVA,EAS_KOR)	2
9	97689570	97689574	ATAAG	-	frameshift_variant	coding	XPA	NM_000380.4	c.349_353del	p.Leu117GlufsTer4	Pathogenic	.	.	.	4.07e-06	.	.	.	.	CHN, SAS	2
9	97689584	97689585	CA	-	frameshift_variant	coding	XPA	NM_000380.4	c.338_339del	p.Met113ArgfsTer9	Likely_pathogenic	rs748286715	.	8.53e-06	8.14e-06	.	.	.	.	NFE_NWE, NFE_SWE	2
9	97693664	97693664	-	TT	frameshift_variant	coding	XPA	NM_000380.4	c.266_267dup	p.Val90LysfsTer15	Pathogenic	rs759052378	.	8.25e-06	1.63e-05	.	.	.	.	NFE_BGR, NFE_SWE	2
10	14945110	14945110	G	A	stop_gained	coding	DCLRE1C	NM_001033855.3	c.241C>T	p.Arg81Ter	Pathogenic	rs121908156	.	8.82e-06	1.22e-05	.	.	Severe_combined_immunodeficiency_with_sensitivity_to_ionizing_radiation|not_provided	RCV000004929.4|RCV000224235.2	AMR, NFE_NWE	2
10	14953908	14953908	G	C	missense_variant	coding	DCLRE1C	NM_001033855.3	c.103C>G	p.His35Asp	Likely_pathogenic	rs121908159	.	.	4.08e-06	.	.	Histiocytic_medullary_reticulosis	RCV000004938.4	ICE, NFE_ONF	2
10	49461351	49461351	-	T	frameshift_variant,splice_region_variant	coding	ERCC6	NM_000124.4	c.3983dup	p.Ser1329GlufsTer2	Pathogenic	rs760027420	.	8.31e-06	8.14e-06	.	.	.	.	NFE_NWE, NFE_ONF	2
10	49472472	49472472	T	C	splice_acceptor_variant	coding	ERCC6	NM_000124.4	c.2830-2A>G	-	Pathogenic	rs373227647	.	1.65e-05	1.22e-05	.	.	Cockayne_syndrome_B|not_provided	RCV000170381.1|RCV000397640.1	NFE_NWE, SAS	2
10	49476312	49476312	T	C	splice_acceptor_variant	coding	ERCC6	NM_000124.4	c.2287-2A>G	-	Likely_pathogenic	rs754978734	.	8.35e-06	1.22e-05	.	.	.	.	NFE_NWE, NFE_ONF	2
10	49482713	49482713	C	A	stop_gained	coding	ERCC6	NM_000124.4	c.2143G>T	p.Gly715Ter	Pathogenic	rs780538788	.	2.48e-05	2.44e-05	.	.	.	.	NFE_NWE, NFE_SEU	2
10	49482848	49482848	G	A	missense_variant	coding	ERCC6	NM_000124.4	c.2008C>T	p.Arg670Trp	Pathogenic	rs202080674	.	.	8.13e-06	COSM1205623	1(large_intestine)	Cockayne_syndrome_B	RCV000170376.1	AMR, SAS	2
10	49500616	49500616	A	C	missense_variant	coding	ERCC6	NM_000124.4	c.1607T>G	p.Leu536Trp	Pathogenic	rs774175886	.	6.6e-05	4.07e-05	.	.	.	.	CHN, EAS_OEA	2
10	49505883	49505883	C	A	splice_donor_variant	coding	ERCC6	NM_000124.4	c.1526+1G>T	-	Pathogenic/Likely_pathogenic	rs371739894	.	2.49e-05	1.22e-05	.	.	Cockayne_syndrome_B	RCV000170365.2	NFE_NWE, NFE_ONF	2
10	49530797	49530797	G	A	stop_gained	coding	ERCC6	NM_000124.4	c.466C>T	p.Gln156Ter	Pathogenic	rs751838040	.	8.24e-06	8.13e-06	.	.	Cockayne_syndrome_B|not_provided	RCV000193828.1|RCV000224212.2	FIN, NFE_NWE	2
10	49532542	49532542	C	T	splice_donor_variant	coding	ERCC6	NM_000124.4	c.422+1G>A	-	Likely_pathogenic	.	.	.	8.14e-06	COSM5612596	1(adrenal_gland)	.	.	NFE_NWE, SAS	2
10	49532736	49532736	G	A	stop_gained	coding	ERCC6	NM_000124.4	c.229C>T	p.Arg77Ter	Pathogenic	rs121917903	.	.	1.22e-05	.	.	UV-sensitive_syndrome	RCV000001777.5	AMR, NFE_ONF	2
11	108227691	108227691	C	T	stop_gained	coding	ATM	NM_000051.4	c.67C>T	p.Arg23Ter	Pathogenic	rs746235533	.	2.47e-05	2.03e-05	COSM2110314;COSM2110315	1(prostate);2(large_intestine)	Hereditary_cancer-predisposing_syndrome	RCV000215307.1	NFE_BGR, SAS	2
11	108244867	108244867	C	T	stop_gained	coding	ATM	NM_000051.4	c.742C>T	p.Arg248Ter	Pathogenic/Likely_pathogenic	rs730881336	.	8.24e-06	8.14e-06	COSM1506644;COSM1506643	1(pancreas);1(lung)	Hereditary_cancer-predisposing_syndrome|not_provided|Ataxia-telangiectasia_syndrome	RCV000159678.4|RCV000211945.1|RCV000410046.1	KOR(EAS_KOR), SAS	2
11	108245000	108245000	C	T	missense_variant	coding	ATM	NM_000051.4	c.875C>T	p.Pro292Leu	Pathogenic/Likely_pathogenic	rs747727055	.	1.7e-05	8.21e-06	.	.	Hereditary_cancer-predisposing_syndrome|not_specified	RCV000220769.1|RCV000255507.2	EAS_OEA, NFE_NWE	2
11	108249005	108249005	-	ACAG	frameshift_variant	coding	ATM	NM_000051.4	c.1139_1142dup	p.Ser381ArgfsTer27	Pathogenic/Likely_pathogenic	.	.	.	8.13e-06	.	.	not_provided|Ataxia-telangiectasia_syndrome	RCV000285085.1|RCV000475637.1	NFE_NWE, NFE_ONF	2
11	108251073	108251073	G	T	splice_donor_variant	coding	ATM	NM_000051.4	c.1607+1G>T	-	Pathogenic/Likely_pathogenic	rs772926890	.	8.29e-06	4.07e-06	.	.	Ataxia-telangiectasia_syndrome|not_provided	RCV000203930.1|RCV000235749.1	ASJ, NFE_ONF	2
11	108257512	108257513	CT	-	frameshift_variant	coding	ATM	NM_000051.4	c.2284_2285del	p.Leu762ValfsTer2	Pathogenic/Likely_pathogenic	rs587781658	.	.	8.13e-06	.	.	Hereditary_cancer-predisposing_syndrome|Ataxia-telangiectasia_syndrome	RCV000129801.3|RCV000233154.2	NFE_NWE, NFE_ONF	2
11	108267258	108267258	C	T	stop_gained	coding	ATM	NM_000051.4	c.2554C>T	p.Gln852Ter	Pathogenic	rs758081262	.	2.47e-05	1.63e-05	COSM1731914;COSM1731915	1(haematopoietic_and_lymphoid_tissue)	Ataxia-telangiectasia_syndrome	RCV000457787.1	FIN, NFE_SWE	2
11	108272531	108272531	G	A	splice_acceptor_variant	coding	ATM	NM_000051.4	c.3078-1G>A	-	Pathogenic/Likely_pathogenic	rs750663117	.	8.27e-06	1.22e-05	.	.	Hereditary_cancer-predisposing_syndrome|Ataxia-telangiectasia_syndrome	RCV000219914.1|RCV000410565.1	NFE_NWE, NFE_SWE	2
11	108272848	108272848	A	-	frameshift_variant	coding	ATM	NM_000051.4	c.3281del	p.Asn1094IlefsTer15	Pathogenic	rs776516754	.	1.65e-05	8.14e-06	.	.	.	.	AFR, NFE_SWE	2
11	108281168	108281168	G	A	splice_region_variant,synonymous_variant	coding	ATM	NM_000051.4	c.3576G>A	p.Lys1192=	Pathogenic	rs587776551	.	1.65e-05	1.63e-05	.	.	Ataxia-telangiectasia_syndrome|Hereditary_cancer-predisposing_syndrome|not_provided	RCV000003174.5|RCV000165646.1|RCV000236731.2	NFE_BGR, NFE_NWE	2
11	108284474	108284474	G	A	splice_donor_variant	coding	ATM	NM_000051.4	c.3993+1G>A	-	Pathogenic/Likely_pathogenic	rs200196781	.	2.48e-05	1.63e-05	.	.	Hereditary_cancer-predisposing_syndrome|Ataxia-telangiectasia_syndrome|not_provided\x2cAtaxia-telangiectasia_syndrome	RCV000129961.2|RCV000228950.2|RCV000438634.1\x2cRCV000409640.1	NFE_SWE, NFE_ONF	2
11	108295002	108295002	C	T	stop_gained	coding	ATM	NM_000051.4	c.4852C>T	p.Arg1618Ter	Pathogenic	rs762083530	.	8.24e-06	4.06e-06	COSM1350874;COSM1350875	1(haematopoietic_and_lymphoid_tissue);2(large_intestine);1(biliary_tract)	Hereditary_cancer-predisposing_syndrome	RCV000166912.1	CHN, SAS	2
11	108295060	108295060	G	A	splice_donor_variant	coding	ATM	NM_000051.4	c.4909+1G>A	-	Pathogenic	rs756987454	.	8.24e-06	8.13e-06	.	.	.	.	NFE_BGR, SAS	2
11	108301658	108301658	C	T	stop_gained	coding	ATM	NM_000051.4	c.5188C>T	p.Arg1730Ter	Pathogenic/Likely_pathogenic	rs764389018	.	8.24e-06	8.13e-06	COSM172204;COSM1183960	4(large_intestine)	Ataxia-telangiectasia_syndrome	RCV000169451.2	NFE_NWE, NFE_SWE	2
11	108304801	108304801	C	T	stop_gained	coding	ATM	NM_000051.4	c.5623C>T	p.Arg1875Ter	Pathogenic	rs376603775	.	1.66e-05	2.04e-05	COSM1350896;COSM1350897	1(haematopoietic_and_lymphoid_tissue);1(large_intestine)	not_provided	RCV000236653.2	FIN, NFE_NWE	2
11	108307914	108307914	C	T	stop_gained	coding	ATM	NM_000051.4	c.5692C>T	p.Arg1898Ter	Pathogenic	rs775036118	.	8.38e-06	8.14e-06	.	.	.	.	NFE_ONF, SAS	2
11	108312467	108312471	AAAGT	-	frameshift_variant	coding	ATM	NM_000051.4	c.5979_5983del	p.Ser1993ArgfsTer23	Pathogenic	rs749049519	.	8.26e-06	8.13e-06	.	.	Hereditary_cancer-predisposing_syndrome|Ataxia-telangiectasia_syndrome	RCV000219008.1|RCV000459567.1	NFE_EST, NFE_SEU	2
11	108316015	108316015	C	T	stop_gained	coding	ATM	NM_000051.4	c.6100C>T	p.Arg2034Ter	Pathogenic/Likely_pathogenic	rs532480170	.	.	4.06e-06	COSM922732;COSM1350936	2(large_intestine);1(endometrium)	Hereditary_cancer-predisposing_syndrome|not_specified\x2cHereditary_cancer-predisposing_syndrome|Ataxia-telangiectasia_syndrome|not_provided	RCV000215954.1|RCV000418769.1\x2cRCV000115222.7|RCV000122867.4|RCV000235108.2	CHN, SAS	2
11	108329202	108329202	T	G	missense_variant	coding	ATM	NM_000051.4	c.7271T>G	p.Val2424Gly	Pathogenic/Likely_pathogenic	rs28904921	.	2.56e-05	4.47e-05	COSM22477;COSM5880831	1(haematopoietic_and_lymphoid_tissue);1(soft_tissue)	Ataxia-telangiectasia_variant|T-cell_prolymphocytic_leukemia|Breast_cancer\x2c_susceptibility_to|Hereditary_cancer-predisposing_syndrome|Ataxia-telangiectasia_syndrome|not_provided|Breast_cancer	RCV000003159.5|RCV000003160.7|RCV000003161.5|RCV000115244.7|RCV000168223.6|RCV000212060.3|RCV000417259.1	AMR, NFE_NWE	2
11	108330355	108330355	G	A	stop_gained	coding	ATM	NM_000051.4	c.7449G>A	p.Trp2483Ter	Pathogenic	rs773516672	.	8.24e-06	1.63e-05	.	.	not_provided	RCV000236176.1	AMR, FIN	2
11	108332851	108332855	TTATA	-	frameshift_variant	coding	ATM	NM_000051.4	c.7886_7890del	p.Ile2629SerfsTer25	Pathogenic/Likely_pathogenic	.	.	.	4.07e-06	COSM5576307;COSM4745907	1(haematopoietic_and_lymphoid_tissue);1(stomach)	Ataxia-telangiectasia_syndrome|Hereditary_cancer-predisposing_syndrome	RCV000003171.5|RCV000222650.1	JPN, NFE_NWE	2
11	108335080	108335080	G	A	missense_variant	coding	ATM	NM_000051.4	c.8122G>A	p.Asp2708Asn	Pathogenic/Likely_pathogenic	rs587782719	.	.	4.06e-06	COSM48246	1(lung)	Hereditary_cancer-predisposing_syndrome|not_provided\x2cAtaxia-telangiectasia_syndrome	RCV000132208.3|RCV000255899.1\x2cRCV000457844.1	JPN, SAS	2
11	108335959	108335959	A	T	stop_gained,splice_region_variant	coding	ATM	NM_000051.4	c.8266A>T	p.Lys2756Ter	Pathogenic/Likely_pathogenic	rs371638537	.	8.43e-06	1.63e-05	COSM758333	1(haematopoietic_and_lymphoid_tissue)	Hereditary_cancer-predisposing_syndrome\x2cAtaxia-telangiectasia_syndrome|Hereditary_cancer-predisposing_syndrome|not_provided	RCV000216787.1\x2cRCV000122886.6|RCV000128904.5|RCV000212082.2	NFE_NWE, NFE_ONF	2
11	108343246	108343246	G	A	missense_variant	coding	ATM	NM_000051.4	c.8293G>A	p.Gly2765Ser	Pathogenic/Likely_pathogenic	rs748634900	.	8.24e-06	8.13e-06	.	.	Hereditary_cancer-predisposing_syndrome|Ataxia-telangiectasia_syndrome	RCV000165932.2|RCV000200060.1	NFE_NWE, NFE_SWE	2
11	108343260	108343260	G	A	stop_gained	coding	ATM	NM_000051.4	c.8307G>A	p.Trp2769Ter	Pathogenic/Likely_pathogenic	rs778269655	.	8.24e-06	8.13e-06	COSM265664	1(large_intestine)	Ataxia-telangiectasia_syndrome	RCV000169516.3	EAS_OEA, NFE_NWE	2
11	108343372	108343375	GTGA	-	splice_donor_variant,intron_variant	coding	ATM	NM_000051.4	c.8418+5_8418+8del	-	Pathogenic	rs769139997	.	8.25e-06	4.07e-06	.	.	Hereditary_cancer-predisposing_syndrome|Ataxia-telangiectasia_syndrome|not_provided	RCV000159624.4|RCV000204238.3|RCV000212083.2	JPN, NFE_NWE	2
11	108353881	108353881	G	A	splice_donor_variant	coding	ATM	NM_000051.4	c.8786+1G>A	-	Pathogenic/Likely_pathogenic	rs17174393	.	1.65e-05	1.22e-05	COSM1351047	1(haematopoietic_and_lymphoid_tissue)	not_provided|Ataxia-telangiectasia_syndrome|Hereditary_cancer-predisposing_syndrome\x2cHereditary_cancer-predisposing_syndrome|Ataxia-telangiectasia_syndrome|not_provided\x2cHereditary_cancer-predisposing_syndrome	RCV000115269.3|RCV000169303.3|RCV000220586.1\x2cRCV000166748.2|RCV000196816.1|RCV000254910.1\x2cRCV000164050.2	NFE_NWE, NFE_ONF	2
11	108365105	108365108	TGAC	-	frameshift_variant	coding	ATM	NM_000051.4	c.8876_8879del	p.Asp2959GlyfsTer3	Pathogenic/Likely_pathogenic	rs786204726	.	8.26e-06	1.22e-05	.	.	Ataxia-telangiectasia_syndrome|not_provided	RCV000169561.3|RCV000236349.2	AMR, NFE_NWE	2
11	108365208	108365208	C	T	stop_gained	coding	ATM	NM_000051.4	c.8977C>T	p.Arg2993Ter	Pathogenic/Likely_pathogenic	rs770641163	.	1.65e-05	1.22e-05	COSM428365;COSM1474997	2(breast);1(haematopoietic_and_lymphoid_tissue);1(thyroid);2(large_intestine);1(endometrium)	Hereditary_cancer-predisposing_syndrome|Ataxia-telangiectasia_syndrome|not_provided|Hereditary_breast_and_ovarian_cancer_syndrome	RCV000165909.2|RCV000169469.3|RCV000414034.1|RCV000416708.1	NFE_NWE, NFE_ONF	2
11	108365359	108365359	C	T	missense_variant	coding	ATM	NM_000051.4	c.9022C>T	p.Arg3008Cys	Pathogenic/Likely_pathogenic	rs587782292	.	2.47e-05	1.63e-05	COSM1351056;COSM21642	1(NS);2(stomach);9(haematopoietic_and_lymphoid_tissue);1(pancreas);1(prostate);1(large_intestine);1(small_intestine)	Hereditary_cancer-predisposing_syndrome|Ataxia-telangiectasia_syndrome|not_provided	RCV000131173.5|RCV000169274.3|RCV000212096.2	EAS_OEA, NFE_NWE	2
11	108365360	108365360	G	A	missense_variant	coding	ATM	NM_000051.4	c.9023G>A	p.Arg3008His	Likely_pathogenic	rs587781894	.	8.24e-06	8.13e-06	COSM1139600;COSM21626	10(haematopoietic_and_lymphoid_tissue);2(pancreas);1(lung);2(large_intestine)	Hereditary_cancer-predisposing_syndrome|Ataxia-telangiectasia_syndrome|not_provided	RCV000130230.3|RCV000196159.2|RCV000254719.2	FIN, NFE_SEU	2
11	108365476	108365476	C	T	stop_gained	coding	ATM	NM_000051.4	c.9139C>T	p.Arg3047Ter	Pathogenic	rs121434219	.	.	1.62e-05	COSM21624;COSM1152251	4(haematopoietic_and_lymphoid_tissue);1(prostate);1(endometrium)	Ataxia-telangiectasia_without_immunodeficiency|Ataxia-telangiectasia_syndrome	RCV000003168.4|RCV000199061.3	FIN, SAS	2
11	22625207	22625207	G	-	frameshift_variant	coding	FANCF	NM_022725.4	c.604del	p.Leu202Ter	Likely_pathogenic	.	.	.	8.17e-06	.	.	.	.	NFE_NWE, NFE_ONF	2
11	47234872	47234872	G	A	missense_variant	coding	DDB2	NM_000107.3	c.818G>A	p.Arg273His	Pathogenic	rs121434640	.	1.65e-05	2.03e-05	.	.	Xeroderma_pigmentosum\x2c_group_E	RCV000009333.2	FIN, NFE_NWE	2
11	65720363	65720363	G	A	missense_variant	coding	RNASEH2C	NM_032193.4	c.227C>T	p.Pro76Leu	Likely_pathogenic	rs76091978	.	8.26e-06	8.12e-06	.	.	.	.	EAS_OEA, NFE_NWE	2
11	65720385	65720385	G	A	missense_variant	coding	RNASEH2C	NM_032193.4	c.205C>T	p.Arg69Trp	Pathogenic/Likely_pathogenic	rs78635798	.	9.12e-05	9.35e-05	.	.	Aicardi_Goutieres_syndrome_3|not_provided	RCV000001322.5|RCV000414153.1	NFE_NWE, SAS	2
11	94459461	94459461	G	A	stop_gained	coding	MRE11	NM_005591.4	c.1447C>T	p.Arg483Ter	Pathogenic	rs780001540	.	8.24e-06	8.13e-06	.	.	Hereditary_cancer-predisposing_syndrome	RCV000216978.1	EAS_OEA, NFE_ONF	2
11	94459466	94459466	G	T	missense_variant	coding	MRE11	NM_005591.4	c.1442C>A	p.Thr481Lys	Pathogenic	rs137852762	.	8.24e-06	4.06e-06	.	.	Ataxia-telangiectasia-like_disorder_1	RCV000009330.2	CHN, SAS	2
11	94464111	94464111	A	G	splice_donor_variant	coding	MRE11	NM_005591.4	c.1225+2T>C	-	Likely_pathogenic	rs145058858	.	8.28e-06	8.13e-06	.	.	.	.	NFE_ONF, SAS	2
11	94464115	94464115	-	T	frameshift_variant	coding	MRE11	NM_005591.4	c.1222dup	p.Thr408AsnfsTer49	Pathogenic/Likely_pathogenic	rs774440500	.	8.27e-06	1.63e-05	.	.	Hereditary_cancer-predisposing_syndrome	RCV000163829.1	NFE_NWE, NFE_ONF	2
11	94471598	94471599	AG	-	frameshift_variant	coding	MRE11	NM_005591.4	c.820_821del	p.Leu274PhefsTer16	Pathogenic/Likely_pathogenic	.	.	.	2.04e-05	.	.	.	.	AMR, NFE_ONF	2
11	94479763	94479763	T	C	splice_acceptor_variant	coding	MRE11	NM_005591.4	c.315-2A>G	-	Likely_pathogenic	.	.	.	8.33e-06	.	.	Hereditary_cancer-predisposing_syndrome	RCV000215862.1	NFE_NWE, NFE_ONF	2
12	56752195	56752195	C	A	splice_donor_variant	coding	PRIM1	NM_000946.3	c.103+1G>T	-	Pathogenic	rs762016916	.	2.45e-05	9.2e-06	.	.	.	.	NFE_NWE, NFE_ONF	2
13	102861621	102861621	C	T	stop_gained	coding	ERCC5	NM_000123.4	c.787C>T	p.Arg263Ter	Pathogenic	rs121434572	0.0002	8.24e-06	4.06e-06	.	.	Xeroderma_pigmentosum_group_g/Cockayne_syndrome	RCV000018038.24	EAS_OEA, NFE_SWE	2
13	102861621	102861621	C	T	stop_gained	coding	BIVM-ERCC5	NM_001204425.2	c.2149C>T	p.Arg717Ter	Pathogenic	rs121434572	0.0002	8.24e-06	4.06e-06	.	.	Xeroderma_pigmentosum_group_g/Cockayne_syndrome	RCV000018038.24	EAS_OEA, NFE_SWE	2
13	102862245	102862245	C	T	stop_gained	coding	ERCC5	NM_000123.4	c.1096C>T	p.Arg366Ter	Likely_pathogenic	.	.	.	1.22e-05	.	.	.	.	CHN, EAS_OEA	2
13	102862245	102862245	C	T	stop_gained	coding	BIVM-ERCC5	NM_001204425.2	c.2458C>T	p.Arg820Ter	Likely_pathogenic	.	.	.	1.22e-05	.	.	.	.	CHN, EAS_OEA	2
13	102872397	102872397	G	T	stop_gained,splice_region_variant	coding	BIVM-ERCC5	NM_001204425.2	c.4240G>T	p.Glu1414Ter	Pathogenic	rs121434570	.	8.28e-06	8.13e-06	.	.	Xeroderma_pigmentosum\x2c_group_G	RCV000018034.25	NFE_NWE, NFE_SWE	2
13	102872397	102872397	G	T	stop_gained,splice_region_variant	coding	ERCC5	NM_000123.4	c.2878G>T	p.Glu960Ter	Pathogenic	rs121434570	.	8.28e-06	8.13e-06	.	.	Xeroderma_pigmentosum\x2c_group_G	RCV000018034.25	NFE_NWE, NFE_SWE	2
13	108209365	108209365	T	-	frameshift_variant	coding	LIG4	NM_206937.2	c.1904del	p.Lys635ArgfsTer10	Pathogenic	rs375554612	0.0006	6.6e-05	6.09e-05	.	.	.	.	AFR, SAS	2
13	108209531	108209531	G	A	stop_gained	coding	LIG4	NM_206937.2	c.1738C>T	p.Arg580Ter	Pathogenic	rs104894418	.	.	4.06e-06	.	.	Lig4_syndrome	RCV000008111.2	NFE_NWE, SAS	2
13	108210424	108210424	T	A	missense_variant	coding	LIG4	NM_206937.2	c.845A>T	p.His282Leu	Likely_pathogenic	rs777008519	.	8.26e-06	8.15e-06	.	.	.	.	NFE_SWE, NFE_ONF	2
13	108210656	108210656	A	-	frameshift_variant	coding	LIG4	NM_206937.2	c.613del	p.Ser205LeufsTer29	Pathogenic	rs780879476	.	3.31e-05	4.49e-05	COSM6031533	1(large_intestine)	.	.	AMR, NFE_NWE	2
13	32319101	32319101	G	A	stop_gained	coding	BRCA2	NM_000059.4	c.92G>A	p.Trp31Ter	Pathogenic	rs397508045	.	8.32e-06	4.07e-06	.	.	Hereditary_breast_and_ovarian_cancer_syndrome|Breast-ovarian_cancer\x2c_familial_2\x2cBreast_cancer	RCV000045785.3|RCV000241373.2\x2cRCV000240757.1	CHN, SAS	2
13	32330987	32330990	GACA	-	frameshift_variant	coding	BRCA2	NM_000059.4	c.755_758del	p.Asp252ValfsTer24	Pathogenic	rs80359659	.	.	8.14e-06	.	.	Breast-ovarian_cancer\x2c_familial_2|not_provided|Hereditary_cancer-predisposing_syndrome|Hereditary_breast_and_ovarian_cancer_syndrome	RCV000031685.9|RCV000045245.7|RCV000162899.3|RCV000167860.3	EAS_OEA, NFE_NWE	2
13	32331004	32331008	CAAAT	-	frameshift_variant	coding	BRCA2	NM_000059.4	c.771_775del	p.Asn257LysfsTer17	Pathogenic	rs80359675	.	1.77e-05	8.14e-06	.	.	Breast-ovarian_cancer\x2c_familial_2|Familial_cancer_of_breast|Hereditary_cancer-predisposing_syndrome|Hereditary_breast_and_ovarian_cancer_syndrome|not_provided	RCV000009913.13|RCV000056288.6|RCV000131848.3|RCV000195405.2|RCV000212208.2	CHN, FIN	2
13	32332428	32332428	-	A	frameshift_variant	coding	BRCA2	NM_000059.4	c.956dup	p.Asn319LysfsTer8	Pathogenic	rs80359770	.	8.32e-06	8.85e-06	.	.	Hereditary_breast_and_ovarian_cancer_syndrome|Breast-ovarian_cancer\x2c_familial_2|Hereditary_cancer-predisposing_syndrome|not_provided|Familial_cancer_of_breast	RCV000045857.2|RCV000077045.6|RCV000166558.2|RCV000213917.2|RCV000467638.1	EAS_OEA, NFE_SEU	2
13	32333283	32333283	-	A	frameshift_variant	coding	BRCA2	NM_000059.4	c.1813dup	p.Ile605AsnfsTer11	Pathogenic	rs80359308	.	2.59e-05	1.32e-05	COSM1163038;COSM1163039	1(pancreas)	Breast-ovarian_cancer\x2c_familial_2|Hereditary_breast_and_ovarian_cancer_syndrome|Hereditary_cancer-predisposing_syndrome|not_provided	RCV000031343.14|RCV000043897.7|RCV000131453.3|RCV000160269.3	AFR, AMR	2
13	32336414	32336418	GATTA	-	frameshift_variant	coding	BRCA2	NM_000059.4	c.2059_2063del	p.Asp687Ter	Pathogenic	rs587782780	.	.	4.07e-06	.	.	Hereditary_cancer-predisposing_syndrome|Breast_cancer|Breast-ovarian_cancer\x2c_familial_2	RCV000132320.2|RCV000240749.1|RCV000241369.1	CHN, SAS	2
13	32336936	32336936	-	A	frameshift_variant	coding	BRCA2	NM_000059.4	c.2588dup	p.Asn863LysfsTer18	Pathogenic	rs80359338	.	1.67e-05	8.98e-06	.	.	Breast-ovarian_cancer\x2c_familial_2|Hereditary_breast_and_ovarian_cancer_syndrome|Hereditary_cancer-predisposing_syndrome|not_provided	RCV000031374.11|RCV000044019.4|RCV000218358.1|RCV000296013.1	ASJ, NFE_NWE	2
13	32337161	32337164	AAAC	-	frameshift_variant	coding	BRCA2	NM_000059.4	c.2808_2811del	p.Ala938ProfsTer21	Pathogenic	rs80359352	.	1.66e-05	1.22e-05	.	.	Breast-ovarian_cancer\x2c_familial_2|Hereditary_breast_and_ovarian_cancer_syndrome|Hereditary_cancer-predisposing_syndrome|not_provided|Breast-ovarian_cancer\x2c_familial_1|not_specified|Breast_cancer|Familial_cancer_of_breast	RCV000009907.9|RCV000044064.9|RCV000131102.4|RCV000160273.3|RCV000210161.1|RCV000238794.1|RCV000240755.2|RCV000458791.1	NFE_NWE, NFE_ONF	2
13	32337185	32337185	A	T	stop_gained	coding	BRCA2	NM_000059.4	c.2830A>T	p.Lys944Ter	Pathogenic	rs80358533	.	.	8.14e-06	COSM5490667;COSM5490666	1(biliary_tract)	Familial_cancer_of_breast|Breast-ovarian_cancer\x2c_familial_2|Hereditary_cancer-predisposing_syndrome|not_provided	RCV000044070.4|RCV000077287.5|RCV000131101.4|RCV000212222.2	NFE_ONF, SAS	2
13	32337522	32337526	AAAAG	-	frameshift_variant	coding	BRCA2	NM_000059.4	c.3170_3174del	p.Lys1057ThrfsTer8	Pathogenic	rs80359373	.	2.5e-05	1.24e-05	.	.	Breast-ovarian_cancer\x2c_familial_2|Hereditary_breast_and_ovarian_cancer_syndrome|Hereditary_cancer-predisposing_syndrome|not_provided	RCV000031407.9|RCV000044141.6|RCV000131091.3|RCV000220190.2	NFE_SEU, NFE_SWE	2
13	32337953	32337954	TG	-	frameshift_variant	coding	BRCA2	NM_000059.4	c.3599_3600del	p.Cys1200Ter	Pathogenic	rs80359392	.	3.3e-05	2.03e-05	.	.	not_provided|Breast-ovarian_cancer\x2c_familial_2|Hereditary_cancer-predisposing_syndrome|Hereditary_breast_and_ovarian_cancer_syndrome	RCV000044230.5|RCV000113196.5|RCV000162919.1|RCV000195400.2	KOR(EAS_KOR), NFE_SWE	2
13	32339176	32339177	TG	-	frameshift_variant	coding	BRCA2	NM_000059.4	c.4821_4822del	p.Glu1608AspfsTer6	Pathogenic	rs769017108	.	8.35e-06	8.15e-06	.	.	Breast-ovarian_cancer\x2c_familial_2	RCV000241328.1	NFE_SEU, NFE_ONF	2
13	32339182	32339183	TG	-	frameshift_variant	coding	BRCA2	NM_000059.4	c.4829_4830del	p.Val1610GlyfsTer4	Pathogenic	rs80359468	.	1.67e-05	8.15e-06	.	.	Hereditary_breast_and_ovarian_cancer_syndrome|Breast-ovarian_cancer\x2c_familial_2|Hereditary_cancer-predisposing_syndrome|not_provided	RCV000044500.4|RCV000077338.8|RCV000162922.2|RCV000217237.2	ASJ, NFE_ONF	2
13	32339461	32339464	AGAA	-	frameshift_variant	coding	BRCA2	NM_000059.4	c.5110_5113del	p.Arg1704Ter	Pathogenic	.	.	.	8.8e-06	.	.	not_provided|Breast-ovarian_cancer\x2c_familial_2|Hereditary_breast_and_ovarian_cancer_syndrome	RCV000235563.1|RCV000257060.2|RCV000457247.1	ASJ, NFE_ONF	2
13	32340073	32340074	CT	-	frameshift_variant	coding	BRCA2	NM_000059.4	c.5722_5723del	p.Leu1908ArgfsTer2	Pathogenic	rs80359531	.	.	4.07e-06	.	.	Breast-ovarian_cancer\x2c_familial_2|Hereditary_breast_and_ovarian_cancer_syndrome|Hereditary_cancer-predisposing_syndrome|not_provided|Familial_cancer_of_breast	RCV000009905.15|RCV000044728.8|RCV000131120.3|RCV000160297.4|RCV000461157.1	JPN, SAS	2
13	32340183	32340183	C	-	frameshift_variant	coding	BRCA2	NM_000059.4	c.5828del	p.Ser1943LeufsTer20	Pathogenic	rs80359541	.	.	4.07e-06	.	.	Breast-ovarian_cancer\x2c_familial_2|not_provided|Hereditary_cancer-predisposing_syndrome|Hereditary_breast_and_ovarian_cancer_syndrome	RCV000031580.7|RCV000044766.6|RCV000131318.3|RCV000195355.2	NFE_NWE, NFE_ONF	2
13	32340219	32340219	C	A	stop_gained	coding	BRCA2	NM_000059.4	c.5864C>A	p.Ser1955Ter	Pathogenic	rs80358815	.	8.27e-06	1.22e-05	.	.	Hereditary_breast_and_ovarian_cancer_syndrome|Breast-ovarian_cancer\x2c_familial_2|Hereditary_cancer-predisposing_syndrome|not_provided\x2cFamilial_cancer_of_breast|Hereditary_cancer-predisposing_syndrome|Breast-ovarian_cancer\x2c_familial_2\x2cHereditary_breast_and_ovarian_cancer_syndrome	RCV000044777.4|RCV000077364.7|RCV000162927.2|RCV000221022.2\x2cRCV000044778.2|RCV000131666.2|RCV000241225.1\x2cRCV000476307.1	EAS_OEA, NFE_ONF	2
13	32340757	32340761	TAACT	-	frameshift_variant	coding	BRCA2	NM_000059.4	c.6405_6409del	p.Asn2135LysfsTer3	Pathogenic	rs80359585	.	8.47e-06	4.23e-06	.	.	Breast-ovarian_cancer\x2c_familial_2|Hereditary_breast_and_ovarian_cancer_syndrome|not_provided|Hereditary_cancer-predisposing_syndrome|Breast_cancer|Familial_cancer_of_breast	RCV000031625.10|RCV000044934.8|RCV000160301.3|RCV000162930.3|RCV000240801.1|RCV000456954.1	CHN, JPN	2
13	32340817	32340820	TCTC	-	frameshift_variant	coding	BRCA2	NM_000059.4	c.6466_6469del	p.Ser2156AsnfsTer11	Pathogenic	rs748536459	.	8.44e-06	4.45e-06	.	.	Familial_cancer_of_breast|Breast-ovarian_cancer\x2c_familial_2	RCV000238933.1|RCV000241080.2	CHN, NFE_BGR	2
13	32340837	32340840	ACAA	-	frameshift_variant	coding	BRCA2	NM_000059.4	c.6486_6489del	p.Lys2162AsnfsTer5	Pathogenic	rs80359598	.	1.68e-05	8.79e-06	.	.	Breast-ovarian_cancer\x2c_familial_2|Hereditary_breast_and_ovarian_cancer_syndrome|Hereditary_cancer-predisposing_syndrome|not_provided	RCV000031630.7|RCV000044967.5|RCV000131034.3|RCV000212249.2	CHN, SAS	2
13	32356472	32356472	C	T	stop_gained	coding	BRCA2	NM_000059.4	c.7480C>T	p.Arg2494Ter	Pathogenic	rs80358972	.	4.96e-05	3.25e-05	.	.	Breast-ovarian_cancer\x2c_familial_2|not_provided|Hereditary_cancer-predisposing_syndrome|Hereditary_breast_and_ovarian_cancer_syndrome	RCV000031681.8|RCV000045227.6|RCV000131084.3|RCV000225750.2	KOR(EAS_KOR), FIN	2
13	32356550	32356550	C	T	stop_gained	coding	BRCA2	NM_000059.4	c.7558C>T	p.Arg2520Ter	Pathogenic	rs80358981	.	2.49e-05	1.63e-05	.	.	Hereditary_breast_and_ovarian_cancer_syndrome|Breast-ovarian_cancer\x2c_familial_2|Breast_cancer|Hereditary_cancer-predisposing_syndrome|Breast-ovarian_cancer\x2c_familial_1|not_provided	RCV000045244.6|RCV000077405.6|RCV000148425.1|RCV000162645.3|RCV000210182.1|RCV000217859.2	AMR, NFE_SWE	2
13	32363225	32363225	A	G	missense_variant	coding	BRCA2	NM_000059.4	c.8023A>G	p.Ile2675Val	Pathogenic	rs397507954	.	.	4.07e-06	.	.	Hereditary_breast_and_ovarian_cancer_syndrome|Hereditary_cancer-predisposing_syndrome|Breast-ovarian_cancer\x2c_familial_2	RCV000045390.3|RCV000132001.2|RCV000258421.1	JPN, KOR(EAS_KOR)	2
13	32371001	32371002	AG	-	frameshift_variant	coding	BRCA2	NM_000059.4	c.8537_8538del	p.Glu2846GlyfsTer22	Pathogenic	rs80359716	.	8.24e-06	1.22e-05	.	.	Breast-ovarian_cancer\x2c_familial_2|Hereditary_breast_and_ovarian_cancer_syndrome|Hereditary_cancer-predisposing_syndrome|not_provided	RCV000009915.17|RCV000045550.9|RCV000131085.3|RCV000160308.4	NFE_NWE, NFE_ONF	2
13	32394814	32394814	C	T	stop_gained	coding	BRCA2	NM_000059.4	c.9382C>T	p.Arg3128Ter	Pathogenic	rs80359212	.	1.65e-05	1.22e-05	COSM2071571;COSM26820	1(pancreas)	Hereditary_breast_and_ovarian_cancer_syndrome|Breast-ovarian_cancer\x2c_familial_2|Hereditary_cancer-predisposing_syndrome|not_provided|Breast_cancer|Familial_cancer_of_breast	RCV000045807.5|RCV000077469.10|RCV000131048.3|RCV000160169.3|RCV000240732.2|RCV000474912.1	AFR, NFE_NWE	2
13	32398210	32398213	TGTA	-	frameshift_variant	coding	BRCA2	NM_000059.4	c.9699_9702del	p.Cys3233TrpfsTer15	Pathogenic	rs80359775	.	9.92e-05	6.94e-05	.	.	Breast-ovarian_cancer\x2c_familial_2|Hereditary_cancer-predisposing_syndrome|Hereditary_breast_and_ovarian_cancer_syndrome|not_specified	RCV000031843.9|RCV000131044.3|RCV000168365.3|RCV000200978.3	AMR, NFE_SWE	2
13	50927394	50927394	G	A	intron_variant	noncoding	RNASEH2B	NM_024570.4	c.65-13G>A	-	Likely_pathogenic	.	.	.	4.07e-06	.	.	.	.	CHN, NFE_NWE	2
13	50949483	50949483	C	G	stop_gained	coding	RNASEH2B	NM_024570.4	c.719C>G	p.Ser240Ter	Pathogenic	rs372632599	.	1.65e-05	1.22e-05	.	.	.	.	NFE_NWE, NFE_ONF	2
14	45175275	45175278	AAAC	-	frameshift_variant	coding	FANCM	NM_020937.4	c.2525_2528del	p.Gln842LeufsTer11	Likely_pathogenic	rs752136594	.	1.67e-05	4.27e-06	.	.	.	.	JPN, NFE_SWE	2
14	45176733	45176734	CA	-	frameshift_variant	coding	FANCM	NM_020937.4	c.3979_3980del	p.Gln1327ValfsTer16	Pathogenic	rs757391108	.	8.27e-06	8.15e-06	.	.	.	.	FIN, NFE_ONF	2
14	45189363	45189363	G	T	splice_donor_variant	coding	FANCM	NM_020937.4	c.5340+1G>T	-	Likely_pathogenic	rs754297345	.	1.66e-05	2.04e-05	.	.	.	.	NFE_NWE, NFE_ONF	2
15	30904918	30904919	TA	-	frameshift_variant	coding	FAN1	NM_014967.5	c.256_257del	p.Met86GlyfsTer14	Pathogenic	rs758406790	.	8.25e-06	1.22e-05	.	.	.	.	NFE_SEU, NFE_ONF	2
15	30913886	30913886	C	T	stop_gained	coding	FAN1	NM_014967.5	c.1606C>T	p.Arg536Ter	Pathogenic	.	.	.	1.22e-05	.	.	.	.	JPN, AMR	2
15	30929384	30929385	TT	-	frameshift_variant	coding	FAN1	NM_014967.5	c.2774_2775del	p.Leu925ProfsTer25	Pathogenic	rs765970053	.	2.49e-05	2.53e-05	.	.	.	.	NFE_NWE, NFE_ONF	2
15	89260711	89260711	A	G	splice_acceptor_variant	coding	FANCI	NM_001113378.2	c.158-2A>G	-	Likely_pathogenic	rs762128147	.	8.24e-06	8.12e-06	.	.	.	.	JPN, KOR(EAS_KOR)	2
15	89283149	89283149	C	T	stop_gained	coding	FANCI	NM_001113378.2	c.1597C>T	p.Arg533Ter	Pathogenic	.	.	.	8.12e-06	COSM4683369;COSM4683368	1(large_intestine)	.	.	KOR(EAS_KOR), AMR	2
15	89285201	89285201	C	T	stop_gained	coding	FANCI	NM_001113378.2	c.1804C>T	p.Arg602Ter	Likely_pathogenic	.	.	.	8.12e-06	.	.	.	.	CHN, FIN	2
15	89295026	89295027	AG	-	frameshift_variant	coding	FANCI	NM_001113378.2	c.2568_2569del	p.Gly857AlafsTer6	Pathogenic	.	.	.	6.54e-06	.	.	.	.	CHN, EAS_OEA	2
15	89303916	89303916	G	A	splice_donor_variant	coding	FANCI	NM_001113378.2	c.3058+1G>A	-	Pathogenic	rs149464307	.	8.25e-06	8.12e-06	.	.	.	.	NFE_NWE, NFE_ONF	2
15	90747491	90747491	G	A	splice_donor_variant	coding	BLM	NM_000057.4	c.98+1G>A	-	Likely_pathogenic	rs750293380	.	1.42e-05	1.33e-05	.	.	Bloom_syndrome\x2cBloom_syndrome	RCV000409688.1\x2cRCV000410622.1	NFE_ONF, SAS	2
15	90749868	90749871	AACA	-	frameshift_variant	coding	BLM	NM_000057.4	c.604_607del	p.Asn202GlnfsTer2	Pathogenic	rs774777021	.	8.36e-06	8.26e-06	.	.	.	.	NFE_SEU, NFE_ONF	2
15	90760851	90760852	AT	-	frameshift_variant	coding	BLM	NM_000057.4	c.1479_1480del	p.Thr494ProfsTer9	Pathogenic/Likely_pathogenic	rs746244182	.	8.3e-06	8.15e-06	.	.	Bloom_syndrome	RCV000409376.1	NFE_NWE, NFE_ONF	2
16	13935414	13935418	AACTC	-	frameshift_variant	coding	ERCC4	NM_005236.3	c.1484_1488del	p.Thr495AsnfsTer6	Pathogenic	rs768847411	.	8.33e-06	8.17e-06	.	.	Fanconi_anemia\x2c_complementation_group_Q	RCV000049244.25	AMR, FIN	2
16	13935661	13935661	-	A	stop_gained,frameshift_variant	coding	ERCC4	NM_005236.3	c.1730dup	p.Tyr577Ter	Pathogenic	rs747759202	.	1.65e-05	8.17e-06	.	.	Xeroderma_pigmentosum\x2c_type_f/Cockayne_syndrome	RCV000049249.24	NFE_SWE, SAS	2
16	2047708	2047708	C	T	splice_donor_variant	coding	NTHL1	NM_002528.7	c.115+1G>A	-	Likely_pathogenic	rs749908882	.	6.97e-05	3.25e-05	.	.	.	.	AMR, NFE_NWE	2
16	23614089	23614089	T	-	frameshift_variant,splice_region_variant	coding	PALB2	NM_024675.4	c.3116del	p.Asn1039IlefsTer2	Pathogenic/Likely_pathogenic	rs180177133	.	.	1.23e-05	.	.	Breast_cancer\x2c_susceptibility_to|Familial_cancer_of_breast|Fanconi_anemia\x2c_complementation_group_N|Pancreatic_cancer_3|Hereditary_cancer-predisposing_syndrome|not_provided	RCV000001309.2|RCV000114595.4|RCV000114596.2|RCV000114597.3|RCV000131150.3|RCV000235691.2	NFE_NWE, NFE_ONF	2
16	23619986	23619986	G	C	intron_variant	noncoding	PALB2	NM_024675.4	c.3113+1376C>G	-	Pathogenic	rs369444	0.1	.	.	.	.	.	.	CHN, JPN, ICE	2
16	23630046	23630046	A	C	stop_gained	coding	PALB2	NM_024675.4	c.2108T>G	p.Leu703Ter	Pathogenic	rs752592662	.	8.24e-06	8.12e-06	.	.	Hereditary_cancer-predisposing_syndrome	RCV000223583.1	EAS_OEA, NFE_NWE	2
16	23634871	23634871	G	A	stop_gained	coding	PALB2	NM_024675.4	c.1675C>T	p.Gln559Ter	Pathogenic	.	.	.	8.16e-06	.	.	.	.	JPN, AMR	2
16	23634954	23634954	A	-	frameshift_variant	coding	PALB2	NM_024675.4	c.1592del	p.Leu531CysfsTer30	Pathogenic	rs180177102	.	0.0001	0.0002	.	.	Breast_cancer\x2c_susceptibility_to|Familial_cancer_of_breast|Hereditary_cancer-predisposing_syndrome|not_provided	RCV000001310.2|RCV000114482.2|RCV000132474.5|RCV000212797.2	FIN, NFE_SWE	2
16	23635493	23635496	TGTT	-	frameshift_variant	coding	PALB2	NM_024675.4	c.1050_1053del	p.Thr351ArgfsTer4	Pathogenic	.	.	.	8.13e-06	.	.	Neoplasm_of_ovary|Hereditary_cancer-predisposing_syndrome|Familial_cancer_of_breast	RCV000114456.1|RCV000129806.3|RCV000470398.1	AFR, EAS_OEA	2
16	23635787	23635787	-	A	frameshift_variant	coding	PALB2	NM_024675.4	c.758dup	p.Ser254IlefsTer3	Pathogenic/Likely_pathogenic	rs756660214	.	3.3e-05	2.44e-05	.	.	Familial_cancer_of_breast|Hereditary_cancer-predisposing_syndrome|not_provided	RCV000114661.6|RCV000129208.3|RCV000212780.2	NFE_NWE, NFE_ONF	2
16	3590829	3590830	CT	-	frameshift_variant	coding	SLX4	NM_032444.4	c.2808_2809del	p.Ala938ThrfsTer7	Pathogenic	rs767631456	.	2.48e-05	2.03e-05	.	.	.	.	NFE_NWE, NFE_SWE	2
16	3594476	3594476	G	A	stop_gained	coding	SLX4	NM_032444.4	c.2137C>T	p.Arg713Ter	Pathogenic	rs760126773	.	3.61e-05	1.63e-05	.	.	.	.	NFE_NWE, SAS	2
16	3608540	3608540	C	-	frameshift_variant	coding	SLX4	NM_032444.4	c.425del	p.Gly142ValfsTer52	Likely_pathogenic	rs757662453	.	1.65e-05	1.22e-05	.	.	.	.	NFE_NWE, SAS	2
16	89738944	89738944	G	A	missense_variant	coding	FANCA	NM_000135.4	c.4198C>T	p.Arg1400Cys	Pathogenic/Likely_pathogenic	rs745882980	.	1.65e-05	1.22e-05	.	.	.	.	AMR, NFE_SEU	2
16	89739175	89739176	TG	-	frameshift_variant	coding	FANCA	NM_000135.4	c.4124_4125del	p.Thr1375SerfsTer49	Pathogenic	rs776969626	.	8.25e-06	8.14e-06	.	.	.	.	EAS_OEA, NFE_SEU	2
16	89739218	89739231	TACATGTCCACAGC	-	frameshift_variant	coding	FANCA	NM_000135.4	c.4069_4082del	p.Ala1357LeufsTer63	Pathogenic	rs747892390	.	8.25e-06	8.13e-06	.	.	Fanconi_anemia	RCV000204633.2	ICE, NFE_SWE	2
16	89739279	89739283	AGGAG	-	frameshift_variant	coding	FANCA	NM_000135.4	c.4017_4021del	p.Ser1340LeufsTer3	Pathogenic	rs773113065	.	2.48e-05	1.63e-05	.	.	.	.	NFE_SWE, NFE_ONF	2
16	89739460	89739477	CCCTGTGGGTGGAGGTAC	-	splice_donor_variant,intron_variant	coding	FANCA	NM_000135.4	c.4010+1_4010+18del	-	Likely_pathogenic	rs752457319	.	4.74e-05	1.98e-05	.	.	.	.	NFE_NWE, NFE_ONF	2
16	89739517	89739517	G	A	missense_variant	coding	FANCA	NM_000135.4	c.3971C>T	p.Pro1324Leu	Pathogenic/Likely_pathogenic	rs182657062	0.0002	5.05e-05	1.35e-05	.	.	.	.	EAS_OEA, NFE_ONF	2
16	89745026	89745026	-	C	frameshift_variant	coding	FANCA	NM_000135.4	c.3558dup	p.Arg1187GlufsTer28	Pathogenic	rs747851434	.	1.84e-05	1.65e-05	.	.	Fanconi_anemia\x2c_complementation_group_A	RCV000003613.3	NFE_NWE, NFE_SEU	2
16	89746891	89746891	C	T	splice_acceptor_variant	coding	FANCA	NM_000135.4	c.3349-1G>A	-	Pathogenic/Likely_pathogenic	rs769862233	.	4.44e-05	9.02e-05	.	.	.	.	FIN, NFE_SWE	2
16	89761961	89761961	-	A	frameshift_variant	coding	FANCA	NM_000135.4	c.2839dup	p.Ser947PhefsTer4	Pathogenic	rs756367276	.	8.24e-06	8.12e-06	.	.	Fanconi_anemia|Fanconi_anemia\x2c_complementation_group_A	RCV000168438.2|RCV000239378.1	NFE_NWE, SAS	2
16	89762015	89762015	T	-	frameshift_variant	coding	FANCA	NM_000135.4	c.2786del	p.Tyr929SerfsTer60	Pathogenic	rs779480428	.	8.24e-06	1.22e-05	.	.	.	.	NFE_SWE, NFE_ONF	2
16	89767185	89767185	G	A	stop_gained	coding	FANCA	NM_000135.4	c.2557C>T	p.Arg853Ter	Pathogenic/Likely_pathogenic	rs752160950	.	8.26e-06	1.22e-05	.	.	Fanconi_anemia\x2c_complementation_group_A	RCV000173013.3	AFR, AMR	2
16	89767196	89767196	G	-	frameshift_variant	coding	FANCA	NM_000135.4	c.2546del	p.Ser849PhefsTer40	Pathogenic	.	.	.	4.06e-06	.	.	.	.	JPN, KOR(EAS_KOR)	2
16	89770192	89770192	G	A	missense_variant	coding	FANCA	NM_000135.4	c.2290C>T	p.Arg764Trp	Pathogenic	rs751572448	.	0	9.64e-06	.	.	.	.	AMR, NFE_NWE	2
16	89771676	89771676	-	C	splice_donor_variant	coding	FANCA	NM_000135.4	c.2151+1dup	-	Likely_pathogenic	rs777971510	.	1.65e-05	8.12e-06	.	.	.	.	NFE_NWE, NFE_ONF	2
16	89775816	89775816	C	T	splice_acceptor_variant	coding	FANCA	NM_000135.4	c.1827-1G>A	-	Pathogenic	rs555449842	0.0002	1.09e-05	1.65e-05	.	.	Fanconi_anemia	RCV000471236.1	ICE, NFE_NWE	2
16	89778851	89778851	C	G	splice_acceptor_variant	coding	FANCA	NM_000135.4	c.1777-1G>C	-	Likely_pathogenic	rs755104393	.	2.47e-05	2.03e-05	.	.	.	.	CHN, EAS_OEA	2
16	89791420	89791420	A	G	missense_variant	coding	FANCA	NM_000135.4	c.1342T>C	p.Tyr448His	Likely_pathogenic	.	.	.	.	.	.	.	.	ICE, SAS	2
16	89791459	89791459	G	A	missense_variant	coding	FANCA	NM_000135.4	c.1303C>T	p.Arg435Cys	Pathogenic/Likely_pathogenic	rs148473140	.	1.68e-05	8.14e-06	.	.	.	.	AFR, NFE_SEU	2
16	89791999	89791999	G	A	missense_variant	coding	FANCA	NM_000135.4	c.1153C>T	p.His385Tyr	Pathogenic	rs757760966	.	1.65e-05	8.12e-06	.	.	.	.	NFE_NWE, NFE_ONF	2
16	89792519	89792520	CT	-	frameshift_variant	coding	FANCA	NM_000135.4	c.1034_1035del	p.Glu345ValfsTer63	Pathogenic/Likely_pathogenic	rs769580546	.	8.28e-06	8.21e-06	.	.	.	.	NFE_NWE, NFE_SWE	2
16	89792527	89792527	G	A	stop_gained	coding	FANCA	NM_000135.4	c.1027C>T	p.Gln343Ter	Pathogenic	rs755018069	.	8.29e-06	8.21e-06	.	.	.	.	NFE_NWE, NFE_SEU	2
16	89795995	89795996	GT	-	frameshift_variant	coding	FANCA	NM_000135.4	c.916_917del	p.Thr306AlafsTer32	Pathogenic	rs764122657	.	8.25e-06	8.12e-06	.	.	.	.	NFE_NWE, NFE_ONF	2
16	89803481	89803481	-	GA	intron_variant	noncoding	FANCA	NM_000135.4	c.710-142_710-141dup	-	Pathogenic	rs71391245	0.091	.	.	.	.	.	.	CHN, JPN	2
16	89805275	89805275	C	T	splice_region_variant,intron_variant	coding	FANCA	NM_000135.4	c.709+5G>A	-	Pathogenic/Likely_pathogenic	rs759877008	.	1.74e-05	1.65e-05	.	.	Fanconi_anemia\x2cFanconi_anemia	RCV000233245.1\x2cRCV000474895.1	AFR, EAS_OEA	2
16	89815966	89815966	T	A	stop_gained	coding	FANCA	NM_000135.4	c.100A>T	p.Lys34Ter	Pathogenic	rs772858764	.	0.0001	5.69e-05	.	.	.	.	FIN, NFE_SWE	2
16	89816551	89816551	C	T	stop_gained	coding	FANCA	NM_000135.4	c.65G>A	p.Trp22Ter	Pathogenic/Likely_pathogenic	rs761341952	.	0.0002	0.0001	.	.	.	.	ASJ, NFE_ONF	2
16	89816614	89816614	A	T	start_lost	coding	FANCA	NM_000135.4	c.2T>A	p.Met1?	Likely_pathogenic	.	.	.	8.53e-06	.	.	.	.	CHN, NFE_ONF	2
16	89816615	89816615	T	A	start_lost	coding	FANCA	NM_000135.4	c.1A>T	p.Met1?	Likely_pathogenic	.	.	.	8.57e-06	.	.	.	.	JPN, NFE_NWE	2
16	89816615	89816615	T	C	start_lost	coding	FANCA	NM_000135.4	c.1A>G	p.Met1?	Pathogenic	.	.	.	8.57e-06	.	.	.	.	AMR, NFE_NWE	2
17	18274819	18274819	A	-	frameshift_variant	coding	TOP3A	NM_004618.5	c.2989del	p.Cys997ValfsTer11	Pathogenic	rs777850988	.	4.95e-05	4.06e-05	.	.	.	.	AFR, AMR	2
17	35101347	35101347	G	A	stop_gained	coding	RAD51D	NM_002878.3	c.757C>T	p.Arg253Ter	Pathogenic	rs137886232	.	8.26e-06	1.63e-05	COSM4721157;COSM4721158;COSM4721159	1(large_intestine)	Breast-ovarian_cancer\x2c_familial_4|Hereditary_cancer-predisposing_syndrome|not_provided\x2cHereditary_cancer-predisposing_syndrome|Breast-ovarian_cancer\x2c_familial_4|not_specified	RCV000023223.2|RCV000130349.2|RCV000235264.2\x2cRCV000163570.1|RCV000411805.1|RCV000434626.1	AMR, SAS	2
17	35103466	35103466	G	A	stop_gained	coding	RAD51D	NM_002878.3	c.655C>T	p.Gln219Ter	Pathogenic/Likely_pathogenic	rs771007945	.	8.24e-06	8.12e-06	.	.	.	.	NFE_SWE, NFE_ONF	2
17	35103472	35103472	C	A	stop_gained	coding	RAD51D	NM_002878.3	c.649G>T	p.Gly217Ter	Pathogenic/Likely_pathogenic	rs775365939	.	8.24e-06	8.12e-06	.	.	.	.	NFE_SWE, NFE_ONF	2
17	35107026	35107026	G	A	stop_gained	coding	RAD51D	NM_002878.3	c.442C>T	p.Gln148Ter	Pathogenic	rs773906955	.	8.24e-06	8.12e-06	.	.	Hereditary_cancer-predisposing_syndrome	RCV000215616.1	ASJ, NFE_BGR	2
17	43045767	43045767	G	A	stop_gained	coding	BRCA1	NM_007294.4	c.5503C>T	p.Arg1835Ter	Pathogenic	rs41293465	.	.	1.22e-05	COSM78883	1(ovary)	not_provided|Breast-ovarian_cancer\x2c_familial_1|Hereditary_cancer-predisposing_syndrome|Hereditary_breast_and_ovarian_cancer_syndrome|Familial_cancer_of_breast|Breast_cancer	RCV000049020.6|RCV000077627.11|RCV000131862.4|RCV000203652.3|RCV000238956.1|RCV000240766.1	AMR, SAS	2
17	43057078	43057078	G	A	stop_gained	coding	BRCA1	NM_007294.4	c.5251C>T	p.Arg1751Ter	Pathogenic	rs80357123	.	.	1.22e-05	COSM4066736;COSM51256	1(NS);1(stomach)	Hereditary_breast_and_ovarian_cancer_syndrome|not_provided|Breast-ovarian_cancer\x2c_familial_1|Hereditary_cancer-predisposing_syndrome|Breast_cancer	RCV000048882.5|RCV000074600.7|RCV000077611.8|RCV000162884.2|RCV000414226.1	EAS_OEA, FIN	2
17	43063931	43063931	G	A	missense_variant	coding	BRCA1	NM_007294.4	c.5095C>T	p.Arg1699Trp	Pathogenic	rs55770810	.	2.49e-05	2.44e-05	.	.	Hereditary_breast_and_ovarian_cancer_syndrome|Breast-ovarian_cancer\x2c_familial_1|Hereditary_cancer-predisposing_syndrome|Breast_and_colorectal_cancer|not_provided|Fanconi_anemia\x2c_complementation_group_A|Ovarian_cancer|Familial_cancer_of_breast\x2cHereditary_breast_and_ovarian_cancer_syndrome|Hereditary_cancer-predisposing_syndrome	RCV000048789.6|RCV000077595.5|RCV000131821.3|RCV000148390.1|RCV000159999.3|RCV000191041.1|RCV000239322.1|RCV000457515.1\x2cRCV000048788.3|RCV000165701.1	FIN, NFE_NWE	2
17	43070978	43070978	C	-	frameshift_variant	coding	BRCA1	NM_007294.4	c.4936del	p.Val1646SerfsTer12	Pathogenic	rs80357705	.	.	8.13e-06	.	.	Hereditary_breast_and_ovarian_cancer_syndrome|Breast-ovarian_cancer\x2c_familial_1|Hereditary_cancer-predisposing_syndrome|not_provided	RCV000048699.3|RCV000112428.3|RCV000130668.3|RCV000236929.2	ASJ, NFE_NWE	2
17	43091463	43091466	TTGA	-	frameshift_variant	coding	BRCA1	NM_007294.4	c.4065_4068del	p.Asn1355LysfsTer10	Pathogenic	rs80357508	.	1.65e-05	8.14e-06	.	.	Breast-ovarian_cancer\x2c_familial_1|Hereditary_breast_and_ovarian_cancer_syndrome|Hereditary_cancer-predisposing_syndrome|not_provided|not_specified|Familial_cancer_of_breast	RCV000019243.15|RCV000048431.7|RCV000131887.3|RCV000159924.3|RCV000238776.1|RCV000476410.1	NFE_NWE, SAS	2
17	43091772	43091775	AGAC	-	frameshift_variant	coding	BRCA1	NM_007294.4	c.3756_3759del	p.Ser1253ArgfsTer10	Pathogenic	rs80357963	.	2.47e-05	1.63e-05	.	.	Breast-ovarian_cancer\x2c_familial_1|not_provided|Hereditary_cancer-predisposing_syndrome|Hereditary_breast_and_ovarian_cancer_syndrome|Familial_cancer_of_breast	RCV000019242.16|RCV000048314.6|RCV000131810.4|RCV000167859.5|RCV000239051.2	NFE_NWE, NFE_ONF	2
17	43092694	43092695	AT	-	frameshift_variant	coding	BRCA1	NM_007294.4	c.2836_2837del	p.Ile946GlnfsTer5	Pathogenic	rs397509016	.	8.24e-06	8.13e-06	.	.	Breast-ovarian_cancer\x2c_familial_1	RCV000241484.2	NFE_NWE, NFE_ONF	2
17	43093098	43093098	G	-	frameshift_variant	coding	BRCA1	NM_007294.4	c.2433del	p.Lys812ArgfsTer3	Pathogenic	rs80357524	.	8.24e-06	8.15e-06	.	.	Breast-ovarian_cancer\x2c_familial_1|Hereditary_breast_and_ovarian_cancer_syndrome|Hereditary_cancer-predisposing_syndrome|not_provided	RCV000031050.7|RCV000047838.5|RCV000129993.3|RCV000236325.2	KOR(EAS_KOR), AMR	2
17	43093738	43093738	A	C	stop_gained	coding	BRCA1	NM_007294.4	c.1793T>G	p.Leu598Ter	Pathogenic	rs80357118	.	1.65e-05	8.13e-06	.	.	Familial_cancer_of_breast|Breast-ovarian_cancer\x2c_familial_1|Hereditary_cancer-predisposing_syndrome\x2cHereditary_breast_and_ovarian_cancer_syndrome|Breast-ovarian_cancer\x2c_familial_1|Hereditary_cancer-predisposing_syndrome	RCV000047588.2|RCV000111687.4|RCV000162846.2\x2cRCV000047587.3|RCV000111686.3|RCV000219724.1	NFE_SWE, SAS	2
17	43093844	43093844	G	A	stop_gained	coding	BRCA1	NM_007294.4	c.1687C>T	p.Gln563Ter	Pathogenic	rs80356898	.	4.13e-05	2.45e-05	.	.	Breast-ovarian_cancer\x2c_familial_1|Hereditary_breast_and_ovarian_cancer_syndrome|Hereditary_cancer-predisposing_syndrome|not_provided|Ovarian_cancer|Breast_carcinoma|Ovarian_neoplasm	RCV000031007.10|RCV000047559.6|RCV000131897.4|RCV000159956.3|RCV000238721.1|RCV000415155.1|RCV000415155.1	NFE_SWE, NFE_ONF	2
17	43094737	43094740	GAAC	-	frameshift_variant	coding	BRCA1	NM_007294.4	c.791_794del	p.Ser264MetfsTer33	Pathogenic	rs80357707	.	8.27e-06	8.18e-06	.	.	Familial_cancer_of_breast|Breast-ovarian_cancer\x2c_familial_1|Hereditary_cancer-predisposing_syndrome	RCV000049137.2|RCV000112786.2|RCV000215273.1	AMR, NFE_SEU	2
17	58692740	58692740	C	T	stop_gained	coding	RAD51C	NM_058216.3	c.97C>T	p.Gln33Ter	Pathogenic	rs587782528	.	8.25e-06	8.12e-06	.	.	Hereditary_cancer-predisposing_syndrome|Fanconi_anemia\x2c_complementation_group_O|not_provided|Breast-ovarian_cancer\x2c_familial_3	RCV000131716.4|RCV000196217.2|RCV000212932.1|RCV000410098.1	AFR, NFE_NWE	2
17	58695174	58695174	-	A	frameshift_variant	coding	RAD51C	NM_058216.3	c.394dup	p.Thr132AsnfsTer23	Pathogenic	rs754457185	.	1.68e-05	3.7e-05	.	.	Hereditary_cancer-predisposing_syndrome|Fanconi_anemia\x2c_complementation_group_O	RCV000160934.1|RCV000465754.1	CHN, EAS_OEA	2
17	58709862	58709862	C	T	stop_gained	coding	RAD51C	NM_058216.3	c.709C>T	p.Arg237Ter	Pathogenic	rs770637624	.	8.24e-06	1.63e-05	COSM212455	1(breast);1(skin);1(upper_aerodigestive_tract)	Hereditary_cancer-predisposing_syndrome|Fanconi_anemia\x2c_complementation_group_O	RCV000165947.3|RCV000233212.2	EAS_OEA, NFE_ONF	2
17	58709926	58709926	G	A	missense_variant	coding	RAD51C	NM_058216.3	c.773G>A	p.Arg258His	Pathogenic/Likely_pathogenic	rs267606997	.	1.65e-05	1.22e-05	.	.	Fanconi_anemia\x2c_complementation_group_O|Hereditary_cancer-predisposing_syndrome	RCV000007224.2|RCV000131703.2	NFE_SEU, NFE_ONF	2
17	58709991	58709991	G	A	splice_donor_variant	coding	RAD51C	NM_058216.3	c.837+1G>A	-	Pathogenic	rs760235677	.	1.65e-05	1.22e-05	.	.	Breast-ovarian_cancer\x2c_familial_3|Hereditary_cancer-predisposing_syndrome\x2cFanconi_anemia\x2c_complementation_group_O|Breast-ovarian_cancer\x2c_familial_3	RCV000024267.2|RCV000221081.1\x2cRCV000226369.2|RCV000409098.1	FIN, NFE_SEU	2
17	58720817	58720817	G	T	splice_region_variant,intron_variant	coding	RAD51C	NM_058216.3	c.904+5G>T	-	Likely_pathogenic	rs587782702	.	8.32e-06	1.63e-05	.	.	Breast-ovarian_cancer\x2c_familial_3|Hereditary_cancer-predisposing_syndrome|Fanconi_anemia\x2c_complementation_group_O	RCV000007225.2|RCV000132144.3|RCV000225845.2	NFE_NWE, NFE_SEU	2
17	58724038	58724038	A	C	splice_acceptor_variant	coding	RAD51C	NM_058216.3	c.905-2A>C	-	Pathogenic/Likely_pathogenic	rs779582317	.	2.49e-05	8.13e-06	.	.	Fanconi_anemia\x2c_complementation_group_O\x2cnot_provided|Fanconi_anemia\x2c_complementation_group_O	RCV000199789.1\x2cRCV000236382.1|RCV000473356.1	CHN, EAS_OEA	2
17	61683785	61683785	-	T	frameshift_variant	coding	BRIP1	NM_032043.3	c.3260dup	p.Asn1087LysfsTer4	Likely_pathogenic	rs771654971	.	8.26e-06	4.06e-06	.	.	Hereditary_cancer-predisposing_syndrome	RCV000219598.1	CHN, NFE_SWE	2
17	61684098	61684098	-	T	frameshift_variant	coding	BRIP1	NM_032043.3	c.2947dup	p.Ile983AsnfsTer19	Pathogenic/Likely_pathogenic	rs774684620	.	8.26e-06	1.22e-05	.	.	.	.	AMR, NFE_NWE	2
17	61685976	61685976	A	C	stop_gained	coding	BRIP1	NM_032043.3	c.2765T>G	p.Leu922Ter	Pathogenic/Likely_pathogenic	rs587782410	.	8.24e-06	1.22e-05	.	.	Hereditary_cancer-predisposing_syndrome|not_provided|Fanconi_anemia\x2c_complementation_group_J|Neoplasm_of_ovary|Familial_cancer_of_breast|Fanconi_anemia\x2c_complementation_group_J	RCV000131449.2|RCV000216847.3|RCV000410978.1|RCV000412207.1|RCV000468535.1|RCV000468535.1	NFE_NWE, NFE_SWE	2
17	61686008	61686008	-	A	frameshift_variant	coding	BRIP1	NM_032043.3	c.2732dup	p.Thr912AspfsTer27	Pathogenic	rs752780954	.	4.94e-05	4.88e-05	.	.	.	.	NFE_SWE, NFE_ONF	2
17	61715948	61715948	-	A	splice_region_variant,intron_variant	coding	BRIP1	NM_032043.3	c.2492+2dup	-	Pathogenic/Likely_pathogenic	rs587780240	.	8.56e-06	1.64e-05	.	.	Hereditary_cancer-predisposing_syndrome|Familial_cancer_of_breast|Fanconi_anemia\x2c_complementation_group_J|not_provided	RCV000116143.6|RCV000205157.2|RCV000205157.2|RCV000258968.2	NFE_NWE, NFE_ONF	2
17	61716043	61716043	G	C	stop_gained	coding	BRIP1	NM_032043.3	c.2400C>G	p.Tyr800Ter	Pathogenic	rs574552037	.	2.5e-05	2.46e-05	.	.	Hereditary_cancer-predisposing_syndrome|Familial_cancer_of_breast|Fanconi_anemia\x2c_complementation_group_J\x2cHereditary_cancer-predisposing_syndrome|Familial_cancer_of_breast|Fanconi_anemia\x2c_complementation_group_J|not_provided	RCV000164130.2|RCV000228308.2|RCV000228308.2\x2cRCV000131417.4|RCV000205848.2|RCV000205848.2|RCV000254652.2	NFE_SWE, NFE_ONF	2
17	61776487	61776487	-	A	frameshift_variant	coding	BRIP1	NM_032043.3	c.2010dup	p.Glu671Ter	Pathogenic	rs775537066	.	1.65e-05	8.13e-06	.	.	Hereditary_cancer-predisposing_syndrome|Familial_cancer_of_breast|Fanconi_anemia\x2c_complementation_group_J	RCV000167209.2|RCV000205261.3|RCV000205261.3	NFE_NWE, NFE_ONF	2
17	61780325	61780325	G	T	stop_gained	coding	BRIP1	NM_032043.3	c.1871C>A	p.Ser624Ter	Pathogenic	rs587781321	.	8.24e-06	1.62e-05	.	.	Hereditary_cancer-predisposing_syndrome|Familial_cancer_of_breast|not_specified|Fanconi_anemia\x2c_complementation_group_J|Neoplasm_of_ovary\x2cHereditary_cancer-predisposing_syndrome|Familial_cancer_of_breast|Fanconi_anemia\x2c_complementation_group_J|not_provided	RCV000166032.2|RCV000197937.1|RCV000284654.1|RCV000410706.1|RCV000411705.1\x2cRCV000129060.4|RCV000228701.2|RCV000228701.2|RCV000254651.2	NFE_NWE, NFE_ONF	2
17	61784387	61784387	-	T	frameshift_variant	coding	BRIP1	NM_032043.3	c.1510dup	p.Ile504AsnfsTer7	Pathogenic/Likely_pathogenic	rs775735278	.	8.24e-06	4.06e-06	.	.	Hereditary_cancer-predisposing_syndrome	RCV000221659.1	CHN, EAS_OEA	2
17	61801327	61801327	G	A	stop_gained	coding	BRIP1	NM_032043.3	c.1066C>T	p.Arg356Ter	Pathogenic	rs730881633	.	.	8.13e-06	.	.	Hereditary_cancer-predisposing_syndrome|not_provided	RCV000160335.3|RCV000212307.2	AMR, EAS_OEA	2
17	61801348	61801348	C	G	missense_variant	coding	BRIP1	NM_032043.3	c.1045G>C	p.Ala349Pro	Pathogenic/Likely_pathogenic	rs149364097	.	2.47e-05	1.22e-05	.	.	Hereditary_cancer-predisposing_syndrome\x2cFanconi_anemia\x2c_complementation_group_J|not_specified|Hereditary_cancer-predisposing_syndrome|not_provided|Familial_cancer_of_breast|Fanconi_anemia\x2c_complementation_group_J\x2cnot_specified	RCV000213526.1\x2cRCV000023492.2|RCV000120412.1|RCV000131544.3|RCV000216316.2|RCV000466014.1|RCV000466014.1\x2cRCV000431413.1	AFR, NFE_NWE	2
17	61849152	61849152	G	A	stop_gained	coding	BRIP1	NM_032043.3	c.484C>T	p.Arg162Ter	Pathogenic/Likely_pathogenic	rs747604569	.	8.24e-06	8.13e-06	.	.	Hereditary_cancer-predisposing_syndrome|Familial_cancer_of_breast|Fanconi_anemia\x2c_complementation_group_J	RCV000166003.1|RCV000198978.2|RCV000198978.2	AFR, SAS	2
17	61859870	61859873	AACA	-	frameshift_variant	coding	BRIP1	NM_032043.3	c.128_131del	p.Leu43TrpfsTer11	Pathogenic/Likely_pathogenic	.	.	.	4.06e-06	.	.	.	.	CHN, NFE_NWE	2
17	7674872	7674872	T	C	missense_variant	coding	TP53	NM_000546.6	c.659A>G	p.Tyr220Cys	Pathogenic	rs121912666	.	2.5e-05	8.12e-06	COSM99720;COSM99718;COSM3355993;COSM99719;COSM10758;COSM1644277	2(salivary_gland);46(ovary);2(bone);39(breast);15(stomach);29(haematopoietic_and_lymphoid_tissue);16(urinary_tract);8(soft_tissue);10(pancreas);1(peritoneum);11(liver);34(oesophagus);2(skin);9(prostate);28(lung);31(upper_aerodigestive_tract);23(large_intestine);24(central_nervous_system);3(small_intestine);3(biliary_tract);4(endometrium)	Hereditary_cancer-predisposing_syndrome|not_provided|Li-Fraumeni_syndrome|Glioblastoma|Ovarian_Serous_Cystadenocarcinoma|Renal_cell_carcinoma|Malignant_neoplasm_of_body_of_uterus|Neoplasm_of_breast|Squamous_cell_carcinoma_of_lung|Malignant_melanoma_of_skin|Transitional_cell_carcinoma_of_the_bladder|Papillary_renal_cell_carcinoma\x2c_sporadic|Squamous_cell_carcinoma_of_the_head_and_neck|Adenocarci…	RCV000115731.5|RCV000213055.2|RCV000232050.2|RCV000417417.1|RCV000418951.1|RCV000423029.1|RCV000423111.1|RCV000423624.1|RCV000425193.1|RCV000425869.1|RCV000428097.1|RCV000428791.1|RCV000433936.1|RCV000434300.1|RCV000434614.1|RCV000435063.1|RCV000436553.1|RCV000439456.1|RCV000439645.1|RCV000440244.1|RCV000442230.1|RCV000444717.1|RCV000444814.1\x2cRCV000013183.24|RCV000417473.1|RCV000418406.1|RCV00…	NFE_SWE, NFE_ONF	2
17	7675070	7675070	C	T	missense_variant	coding	TP53	NM_000546.6	c.542G>A	p.Arg181His	Pathogenic/Likely_pathogenic	rs397514495	.	1.65e-05	1.22e-05	COSM10738;COSM1386800;COSM3388202;COSM1386797;COSM3388201;COSM1386798;COSM1386799	3(ovary);1(breast);2(stomach);2(haematopoietic_and_lymphoid_tissue);1(kidney);2(urinary_tract);4(pancreas);1(oesophagus);1(skin);3(prostate);1(upper_aerodigestive_tract);4(large_intestine);3(central_nervous_system);1(biliary_tract);2(small_intestine);1(endometrium)	Glioma_susceptibility_1\x2cHereditary_cancer-predisposing_syndrome|Li-Fraumeni_syndrome|not_provided	RCV000032610.3\x2cRCV000131382.3|RCV000168247.5|RCV000255239.1	NFE_NWE, NFE_SWE	2
19	45352226	45352226	C	G	missense_variant	coding	ERCC2	NM_000400.4	c.2173G>C	p.Ala725Pro	Pathogenic	rs121913018	.	3.35e-05	2.03e-05	.	.	Trichothiodystrophy_1\x2c_photosensitive	RCV000018270.28	NFE_NWE, NFE_SWE	2
19	45352351	45352351	C	T	missense_variant,splice_region_variant	coding	ERCC2	NM_000400.4	c.2048G>A	p.Arg683Gln	Pathogenic	.	.	.	1.63e-05	.	.	Xeroderma_pigmentosum\x2c_group_D	RCV000248679.1	NFE_ONF, SAS	2
19	45364121	45364121	T	C	splice_acceptor_variant	coding	ERCC2	NM_000400.4	c.816-2A>G	-	Likely_pathogenic	rs746795177	.	1.1e-05	1.27e-05	.	.	.	.	AFR, NFE_ONF	2
19	45364865	45364865	C	T	stop_gained	coding	ERCC2	NM_000400.4	c.567G>A	p.Trp189Ter	Pathogenic	rs377532898	.	8.35e-06	8.13e-06	.	.	.	.	NFE_SWE, NFE_ONF	2
19	45368655	45368655	C	T	missense_variant	coding	ERCC2	NM_000400.4	c.335G>A	p.Arg112His	Pathogenic	rs121913020	.	2.51e-05	1.63e-05	.	.	Trichothiodystrophy_1\x2c_photosensitive|Xeroderma_pigmentosum\x2c_group_D|not_provided	RCV000018273.25|RCV000018274.29|RCV000424822.1	AFR, NFE_NWE	2
19	45368656	45368656	G	A	missense_variant	coding	ERCC2	NM_000400.4	c.334C>T	p.Arg112Cys	Likely_pathogenic	rs760820378	.	8.36e-06	8.13e-06	.	.	.	.	EAS_OEA, NFE_NWE	2
22	28696985	28696985	G	T	stop_gained,splice_region_variant	coding	CHEK2	NM_007194.4	c.1011C>A	p.Tyr337Ter	Pathogenic	rs760502479	.	8.35e-06	8.14e-06	.	.	Hereditary_cancer-predisposing_syndrome|not_provided	RCV000164779.1|RCV000424411.1	AFR, NFE_SWE	2
22	28710060	28710060	C	A	splice_acceptor_variant	coding	CHEK2	NM_007194.4	c.793-1G>T	-	Likely_pathogenic	rs730881687	.	8.62e-06	1.22e-05	.	.	not_provided|Hereditary_cancer-predisposing_syndrome|Familial_cancer_of_breast	RCV000160429.2|RCV000214915.1|RCV000464029.1	FIN, SAS	2
22	28711986	28711986	C	A	stop_gained	coding	CHEK2	NM_007194.4	c.715G>T	p.Glu239Ter	Pathogenic	rs121908702	.	.	8.13e-06	.	.	Prostate_cancer\x2c_somatic|Hereditary_cancer-predisposing_syndrome\x2cProstate_cancer\x2c_somatic|not_provided|Hereditary_cancer-predisposing_syndrome|Familial_cancer_of_breast|not_specified	RCV000005947.5|RCV000166320.2\x2cRCV000005948.5|RCV000114762.1|RCV000131201.5|RCV000205850.3|RCV000212434.3	AMR, NFE_BGR	2
22	28734402	28734402	C	T	splice_donor_variant	coding	CHEK2	NM_007194.4	c.319+1G>A	-	Pathogenic/Likely_pathogenic	rs765080766	.	1.67e-05	8.13e-06	.	.	.	.	NFE_SWE, SAS	2
22	28734439	28734439	G	A	stop_gained	coding	CHEK2	NM_007194.4	c.283C>T	p.Arg95Ter	Pathogenic	rs587781269	.	1.65e-05	8.13e-06	.	.	Hereditary_cancer-predisposing_syndrome|not_provided|Familial_cancer_of_breast	RCV000128901.3|RCV000215973.2|RCV000232015.2	NFE_NWE, SAS	2
22	28734443	28734443	C	T	stop_gained	coding	CHEK2	NM_007194.4	c.279G>A	p.Trp93Ter	Pathogenic	rs587782070	.	2.48e-05	2.44e-05	.	.	Hereditary_cancer-predisposing_syndrome|Familial_cancer_of_breast|not_provided	RCV000130559.3|RCV000199638.2|RCV000377793.1	AMR, NFE_ONF	2
22	28734475	28734475	G	-	frameshift_variant	coding	CHEK2	NM_007194.4	c.247del	p.Gln83LysfsTer27	Pathogenic/Likely_pathogenic	rs587782766	.	1.65e-05	1.63e-05	.	.	Hereditary_cancer-predisposing_syndrome|Familial_cancer_of_breast|not_provided	RCV000132293.3|RCV000204969.3|RCV000220709.2	NFE_NWE, NFE_ONF	2
22	35410841	35410842	AG	-	frameshift_variant	coding	MCM5	NM_006739.4	c.850_851del	p.Arg284GlyfsTer49	Pathogenic	rs760621295	.	8.25e-06	8.12e-06	.	.	.	.	NFE_NWE, NFE_SEU	2

## Sheet: S3C
Supplementary Table 3C. Deleterious variants shared in 3 populations
Chr	Start	End	Ref	Alt	Consequence	Region	Symbol	Feature	HGVSc	HGVSp	ClinVar_SIG_20210501	dbSNP	1000G_ALL	ExAC_Freq	gnomAD_exome_ALL	COSMIC_ID	COSMIC_DIS	ClinVar_DIS	ClinVar_ID	Shared_ethnicity	Total
1	45331558	45331558	T	C	splice_acceptor_variant	coding	MUTYH	NM_001048174.2	c.1103-2A>G	-	Pathogenic/Likely_pathogenic	rs587781628	.	1.68e-05	2.04e-05	COSM4754227	1(stomach)	Hereditary_cancer-predisposing_syndrome|Carcinoma_of_colon|MYH-associated_polyposis	RCV000129730.3|RCV000172819.1|RCV000338621.1	EAS_OEA, NFE_NWE, NFE_ONF	3
1	45331835	45331835	G	A	stop_gained	coding	MUTYH	NM_001048174.2	c.928C>T	p.Gln310Ter	Pathogenic	rs587780082	.	0.0001	6.57e-05	.	.	Hereditary_cancer-predisposing_syndrome|not_provided|MYH-associated_polyposis	RCV000115753.5|RCV000212713.2|RCV000465024.1	AMR, NFE_SEU, SAS	3
1	45332279	45332279	G	A	missense_variant	coding	MUTYH	NM_001048174.2	c.736C>T	p.Arg246Trp	Likely_pathogenic	rs769237459	.	8.38e-06	8.16e-06	COSM1638133	1(bone);2(skin)	.	.	CHN, AMR, NFE_SEU	3
1	45332300	45332300	G	A	stop_gained	coding	MUTYH	NM_001048174.2	c.715C>T	p.Gln239Ter	Pathogenic	rs786203115	.	.	1.63e-05	.	.	Hereditary_cancer-predisposing_syndrome|MYH-associated_polyposis	RCV000166279.1|RCV000198325.2	CHN, KOR(EAS_KOR), EAS_OEA	3
1	45332457	45332457	C	T	missense_variant	coding	MUTYH	NM_001048174.2	c.638G>A	p.Arg213Gln	Likely_pathogenic	.	.	.	2.85e-05	.	.	.	.	AFR, NFE_NWE, SAS	3
1	45332955	45332955	C	T	stop_gained	coding	MUTYH	NM_001048174.2	c.383G>A	p.Trp128Ter	Pathogenic/Likely_pathogenic	rs762307622	.	4.96e-05	5.71e-05	.	.	Hereditary_cancer-predisposing_syndrome|not_provided|MYH-associated_polyposis	RCV000213856.1|RCV000235993.1|RCV000411443.1	CHN, JPN, EAS_OEA	3
1	45334493	45334493	G	A	stop_gained	coding	MUTYH	NM_001048174.2	c.13C>T	p.Arg5Ter	Pathogenic	rs587780088	.	.	8.12e-06	COSM5969454	1(upper_aerodigestive_tract)	not_provided|Carcinoma_of_colon|MYH-associated_polyposis|Hereditary_cancer-predisposing_syndrome\x2cMYH-associated_polyposis	RCV000115767.2|RCV000144639.1|RCV000206117.3|RCV000447652.1\x2cRCV000467752.1	CHN, KOR(KOVA,EAS_KOR), AMR	3
2	214752472	214752472	G	C	stop_gained	coding	BARD1	NM_000465.4	c.1652C>G	p.Ser551Ter	Pathogenic/Likely_pathogenic	rs587781707	.	1.65e-05	1.63e-05	.	.	Familial_cancer_of_breast\x2cHereditary_cancer-predisposing_syndrome|Familial_cancer_of_breast|not_provided	RCV000205925.1\x2cRCV000129880.5|RCV000206283.3|RCV000212133.1	ICE, NFE_NWE, NFE_ONF	3
2	214781426	214781426	G	A	stop_gained	coding	BARD1	NM_000465.4	c.448C>T	p.Arg150Ter	Pathogenic/Likely_pathogenic	rs730881411	.	8.26e-06	8.15e-06	.	.	not_provided|Hereditary_cancer-predisposing_syndrome|Familial_cancer_of_breast	RCV000159805.2|RCV000213814.1|RCV000471276.1	CHN, NFE_SWE, SAS	3
2	47801086	47801086	C	T	stop_gained	coding	MSH6	NM_000179.3	c.3103C>T	p.Arg1035Ter	Pathogenic	rs63749999	.	8.4e-06	8.24e-06	COSM5451671	1(large_intestine)	Lynch_syndrome|Hereditary_cancer-predisposing_syndrome	RCV000074803.2|RCV000223452.1	EAS_OEA, NFE_SWE, NFE_ONF	3
2	47804984	47804984	-	A	frameshift_variant	coding	MSH6	NM_000179.3	c.3514dup	p.Arg1172LysfsTer5	Pathogenic	rs63751327	.	8.25e-06	8.13e-06	.	.	Lynch_syndrome|Hereditary_cancer-predisposing_syndrome|not_provided|Hereditary_nonpolyposis_colorectal_cancer_type_5	RCV000074872.2|RCV000166347.2|RCV000202194.1|RCV000409599.1	ICE, AMR, NFE_ONF	3
3	10041684	10041684	C	T	stop_gained	coding	FANCD2	NM_001018115.3	c.757C>T	p.Arg253Ter	Pathogenic	rs374328858	.	.	1.22e-05	.	.	.	.	AMR, NFE_NWE, SAS	3
3	10041709	10041709	A	T	missense_variant,splice_region_variant	coding	FANCD2	NM_001018115.3	c.782A>T	p.Lys261Met	Pathogenic	rs778289599	.	8.24e-06	1.22e-05	.	.	.	.	AMR, NFE_NWE, NFE_ONF	3
3	127599441	127599441	C	T	missense_variant	coding	MCM2	NM_004526.4	c.130C>T	p.Arg44Cys	Pathogenic	rs375851208	.	1.65e-05	1.22e-05	.	.	Deafness\x2c_autosomal_dominant_70	RCV000223937.1	CHN, JPN, EAS_OEA	3
3	14158148	14158148	G	A	stop_gained	coding	XPC	NM_004628.5	c.1735C>T	p.Arg579Ter	Pathogenic	rs121965088	0.0002	1.66e-05	1.22e-05	.	.	Xeroderma_pigmentosum\x2c_group_C	RCV000000283.2	KOR(EAS_KOR), AMR, NFE_SEU	3
3	14158640	14158640	G	A	stop_gained	coding	XPC	NM_004628.5	c.1243C>T	p.Arg415Ter	Pathogenic	rs757958943	.	8.28e-06	1.22e-05	.	.	.	.	CHN, AFR, SAS	3
3	14165549	14165549	G	A	stop_gained	coding	XPC	NM_004628.5	c.658C>T	p.Arg220Ter	Pathogenic	rs745679643	.	1.96e-05	2.05e-05	.	.	.	.	NFE_NWE, NFE_SWE, SAS	3
3	14165587	14165587	T	G	splice_acceptor_variant	coding	XPC	NM_004628.5	c.622-2A>C	-	Pathogenic	rs201940931	.	.	8.18e-06	.	.	Xeroderma_pigmentosum\x2c_group_C	RCV000170430.1	AFR, NFE_NWE, NFE_ONF	3
5	132557327	132557327	G	A	start_lost	coding	RAD50	NM_005732.4	c.3G>A	p.Met1?	Likely_pathogenic	rs377260382	.	3.3e-05	4.87e-05	.	.	Hereditary_cancer-predisposing_syndrome|not_provided	RCV000115961.10|RCV000212899.1	NFE_NWE, NFE_SWE, NFE_ONF	3
5	132557417	132557417	-	A	frameshift_variant	coding	RAD50	NM_005732.4	c.94dup	p.Thr32AsnfsTer16	Pathogenic	rs867328327	.	.	1.22e-05	.	.	Hereditary_cancer-predisposing_syndrome	RCV000129727.4	AFR, NFE_NWE, NFE_ONF	3
5	132579363	132579363	C	T	stop_gained	coding	RAD50	NM_005732.4	c.412C>T	p.Arg138Ter	Pathogenic	rs786203485	.	.	8.13e-06	.	.	Hereditary_cancer-predisposing_syndrome	RCV000166807.2	CHN, EAS_OEA, NFE_NWE	3
5	132595768	132595768	-	T	frameshift_variant	coding	RAD50	NM_005732.4	c.2165_2166insT	p.Lys722AsnfsTer6	Pathogenic	rs587781454	.	8.31e-06	1.63e-05	.	.	Hereditary_cancer-predisposing_syndrome	RCV000129381.7	CHN, KOR(EAS_KOR), EAS_OEA	3
5	132603355	132603355	C	T	stop_gained	coding	RAD50	NM_005732.4	c.2263C>T	p.Gln755Ter	Pathogenic	rs765975825	.	2.53e-05	3.26e-05	.	.	.	.	CHN, EAS_OEA, FIN	3
5	132604020	132604021	AA	-	frameshift_variant	coding	RAD50	NM_005732.4	c.2498_2499del	p.Gln833ArgfsTer11	Pathogenic	rs587782895	.	5.79e-05	4.07e-05	.	.	Hereditary_cancer-predisposing_syndrome	RCV000132534.3	JPN, AFR, SAS	3
5	132608683	132608686	AATC	-	frameshift_variant	coding	RAD50	NM_005732.4	c.2789_2792del	p.Ile930ThrfsTer9	Pathogenic	rs779209275	.	1.75e-05	8.87e-06	.	.	Hereditary_cancer-predisposing_syndrome	RCV000130289.2	CHN, AFR, FIN	3
5	132618182	132618182	C	T	stop_gained	coding	RAD50	NM_005732.4	c.3277C>T	p.Arg1093Ter	Pathogenic/Likely_pathogenic	rs121912628	.	8.26e-06	2.03e-05	COSM1060699;COSM1060700	1(endometrium)	Nijmegen_breakage_syndrome-like_disorder	RCV000006230.2	AFR, NFE_NWE, NFE_ONF	3
5	60918364	60918364	G	C	stop_gained	coding	ERCC8	NM_000082.4	c.300C>G	p.Tyr100Ter	Pathogenic	rs143367518	.	2.49e-05	1.64e-05	.	.	Cockayne_syndrome_type_A	RCV000412151.1	AFR, AMR, NFE_SEU	3
5	75590368	75590368	G	A	synonymous_variant	coding	POLK	NM_016218.3	c.1284G>A	p.Ala428=	Pathogenic	rs770984846	.	2.48e-05	2.89e-05	COSM1070130;COSM1070129	1(endometrium)	Malignant_tumor_of_prostate	RCV000170551.1	JPN, NFE_SWE, SAS	3
6	43601092	43601092	G	A	splice_donor_variant	coding	POLH	NM_006502.3	c.764+1G>A	-	Pathogenic	rs772570523	.	8.24e-06	1.22e-05	.	.	Xeroderma_pigmentosum\x2c_variant_type	RCV000208975.2	AFR, AMR, SAS	3
7	5977629	5977629	G	A	stop_gained	coding	PMS2	NM_000535.7	c.2404C>T	p.Arg802Ter	Pathogenic	rs63751466	.	.	2.71e-05	.	.	Turcot_syndrome|Lynch_syndrome|Hereditary_cancer-predisposing_syndrome|Hereditary_nonpolyposis_colorectal_cancer_type_4|not_provided\x2cHereditary_cancer-predisposing_syndrome	RCV000009818.2|RCV000076858.2|RCV000129304.2|RCV000409056.1|RCV000413126.1\x2cRCV000223473.1	AFR, EAS_OEA, SAS	3
7	5982823	5982823	C	T	splice_donor_variant	coding	PMS2	NM_000535.7	c.2174+1G>A	-	Pathogenic	rs267608172	.	4.45e-05	1.67e-05	COSM327137	2(haematopoietic_and_lymphoid_tissue)	Lynch_syndrome|not_provided|Hereditary_cancer-predisposing_syndrome|Hereditary_nonpolyposis_colorectal_cancer_type_4	RCV000076844.4|RCV000115677.2|RCV000218995.1|RCV000409361.1	AMR, NFE_SWE, SAS	3
7	5995573	5995576	CTGT	-	frameshift_variant	coding	PMS2	NM_000535.7	c.861_864del	p.Arg287SerfsTer19	Pathogenic	rs267608154	.	1.65e-05	4.06e-06	COSM5547641	1(prostate)	Lynch_syndrome|Hereditary_cancer-predisposing_syndrome|not_provided	RCV000076894.2|RCV000216774.1|RCV000414373.1	CHN, AFR, NFE_SWE	3
7	5995612	5995612	T	C	synonymous_variant	coding	PMS2	NM_000535.7	c.825A>G	p.Gln275=	Likely_pathogenic	.	.	.	8.12e-06	.	.	Hereditary_cancer-predisposing_syndrome	RCV000219153.1	CHN, AFR, EAS_OEA	3
8	89943297	89943297	G	A	stop_gained	coding	NBN	NM_002485.5	c.2140C>T	p.Arg714Ter	Pathogenic/Likely_pathogenic	rs730881864	.	8.24e-06	2.44e-05	.	.	not_provided|Microcephaly\x2c_normal_intelligence_and_immunodeficiency|Hereditary_cancer-predisposing_syndrome	RCV000160804.3|RCV000204431.2|RCV000215628.1	NFE_BGR, NFE_NWE, NFE_SEU	3
9	35074173	35074182	GACGGATCCA	-	frameshift_variant	coding	FANCG	NM_004629.2	c.1795_1804del	p.Trp599ProfsTer49	Pathogenic	rs776937138	.	3.3e-05	2.44e-05	.	.	Fanconi_anemia\x2c_complementation_group_G	RCV000007110.3	AFR, NFE_NWE, NFE_ONF	3
9	35074489	35074489	G	A	stop_gained	coding	FANCG	NM_004629.2	c.1642C>T	p.Arg548Ter	Pathogenic	rs779834525	.	4.16e-05	1.64e-05	COSM5942254	1(skin)	.	.	CHN, AMR, EAS_OEA	3
9	35075278	35075278	C	G	splice_donor_variant	coding	FANCG	NM_004629.2	c.1480+1G>C	-	Pathogenic	rs149616199	.	2.47e-05	1.62e-05	.	.	Fanconi_anemia\x2c_complementation_group_G	RCV000007109.3	NFE_NWE, NFE_SEU, NFE_ONF	3
9	35075739	35075739	-	G	frameshift_variant	coding	FANCG	NM_004629.2	c.1158dup	p.Ser387LeufsTer9	Pathogenic/Likely_pathogenic	rs781582249	.	2.8e-05	3.64e-05	.	.	.	.	AFR, NFE_NWE, NFE_ONF	3
9	95150056	95150056	G	A	stop_gained	coding	FANCC	NM_000136.3	c.553C>T	p.Arg185Ter	Pathogenic	rs121917783	.	4.14e-05	6.09e-05	.	.	Fanconi_anemia\x2c_complementation_group_C|not_provided|Fanconi_anemia	RCV000012824.4|RCV000115356.3|RCV000471314.1	NFE_NWE, NFE_ONF, SAS	3
9	95171080	95171080	G	A	stop_gained,splice_region_variant	coding	FANCC	NM_000136.3	c.520C>T	p.Arg174Ter	Pathogenic/Likely_pathogenic	rs781542763	.	1.66e-05	1.63e-05	COSM3909140	1(stomach);1(large_intestine)	Fanconi_anemia\x2c_complementation_group_C	RCV000169411.1	CHN, AMR, SAS	3
9	97675476	97675489	GTACAAGTCTTACG	-	frameshift_variant	coding	XPA	NM_000380.4	c.772_785del	p.Arg258TyrfsTer5	Pathogenic/Likely_pathogenic	rs778543124	.	2.48e-05	6.51e-05	.	.	.	.	NFE_BGR, NFE_NWE, NFE_ONF	3
9	97675486	97675486	-	A	frameshift_variant	coding	XPA	NM_000380.4	c.774dup	p.Lys259Ter	Likely_pathogenic	rs752573039	.	1.65e-05	1.63e-05	.	.	.	.	AFR, NFE_NWE, SAS	3
10	14953901	14953901	C	A	splice_donor_variant	coding	DCLRE1C	NM_001033855.3	c.109+1G>T	-	Pathogenic	rs143144732	.	1.67e-05	8.16e-06	.	.	.	.	NFE_NWE, NFE_SWE, NFE_ONF	3
10	49458898	49458898	G	A	stop_gained	coding	ERCC6	NM_000124.4	c.4399C>T	p.Arg1467Ter	Likely_pathogenic	rs762976316	.	2.47e-05	1.63e-05	COSM1128042	1(prostate)	.	.	NFE_NWE, NFE_SWE, NFE_ONF	3
10	49461382	49461383	CT	-	frameshift_variant	coding	ERCC6	NM_000124.4	c.3952_3953del	p.Arg1318GlyfsTer12	Pathogenic/Likely_pathogenic	rs765825423	.	8.26e-06	2.03e-05	.	.	Cockayne_syndrome_B	RCV000170390.1	CHN, NFE_NWE, NFE_ONF	3
10	49470299	49470299	G	A	stop_gained	coding	ERCC6	NM_000124.4	c.3661C>T	p.Arg1221Ter	Pathogenic	rs529174213	0.0002	8.24e-06	8.13e-06	.	.	.	.	CHN, NFE_NWE, SAS	3
10	49482809	49482809	G	A	stop_gained	coding	ERCC6	NM_000124.4	c.2047C>T	p.Arg683Ter	Pathogenic/Likely_pathogenic	rs121917904	.	3.3e-05	2.03e-05	.	.	Cerebro-oculo-facio-skeletal_syndrome|ERCC6-Related_Disorders	RCV000001781.4|RCV000333649.1	EAS_OEA, NFE_NWE, NFE_ONF	3
10	49483384	49483384	G	A	stop_gained	coding	ERCC6	NM_000124.4	c.1954C>T	p.Arg652Ter	Pathogenic/Likely_pathogenic	rs767247987	.	1.65e-05	1.63e-05	COSM3415080	1(skin);1(large_intestine)	Cockayne_syndrome_B	RCV000170373.1	NFE_NWE, NFE_SWE, SAS	3
11	108227806	108227806	C	T	stop_gained	coding	ATM	NM_000051.4	c.103C>T	p.Arg35Ter	Pathogenic/Likely_pathogenic	rs55861249	.	8.26e-06	2.03e-05	COSM1152243;COSM922695	1(endometrium)	Hereditary_cancer-predisposing_syndrome|Ataxia-telangiectasia_syndrome|not_specified\x2cAtaxia-telangiectasia_syndrome|Hereditary_cancer-predisposing_syndrome|not_provided	RCV000162607.1|RCV000227829.2|RCV000242698.1\x2cRCV000003164.5|RCV000130278.4|RCV000236608.2	AMR, NFE_NWE, NFE_ONF	3
11	108245027	108245027	G	A	splice_donor_variant	coding	ATM	NM_000051.4	c.901+1G>A	-	Pathogenic	rs748840480	.	2.68e-05	1.66e-05	.	.	Hereditary_cancer-predisposing_syndrome|Ataxia-telangiectasia_syndrome\x2cnot_provided\x2cHereditary_cancer-predisposing_syndrome	RCV000166407.2|RCV000205735.2\x2cRCV000439479.1\x2cRCV000216527.1	CHN, AMR, SAS	3
11	108247086	108247089	AAAG	-	frameshift_variant	coding	ATM	NM_000051.4	c.1027_1030del	p.Glu343IlefsTer2	Pathogenic/Likely_pathogenic	rs587781717	.	2.48e-05	2.44e-05	.	.	Ataxia-telangiectasia_syndrome|Hereditary_cancer-predisposing_syndrome|not_provided	RCV000122816.7|RCV000129901.4|RCV000236560.2	ASJ, NFE_NWE, NFE_ONF	3
11	108284281	108284281	G	-	frameshift_variant	coding	ATM	NM_000051.4	c.3802del	p.Val1268Ter	Pathogenic	rs765158119	.	3.32e-05	4.07e-05	.	.	Hereditary_cancer-predisposing_syndrome|Ataxia-telangiectasia_syndrome|not_provided	RCV000115179.6|RCV000198788.4|RCV000212002.2	AMR, NFE_NWE, NFE_ONF	3
11	108289761	108289761	C	T	stop_gained	coding	ATM	NM_000051.4	c.4396C>T	p.Arg1466Ter	Pathogenic	rs730881369	.	8.46e-06	1.63e-05	COSM3786967;COSM171676	1(pancreas)	Hereditary_cancer-predisposing_syndrome|Ataxia-telangiectasia_syndrome|not_specified\x2cAtaxia-telangiectasia_syndrome|Hereditary_cancer-predisposing_syndrome	RCV000159723.4|RCV000197917.2|RCV000212014.1\x2cRCV000227538.1|RCV000445657.1	AMR, NFE_NWE, SAS	3
11	108312424	108312424	G	T	stop_gained	coding	ATM	NM_000051.4	c.5932G>T	p.Glu1978Ter	Pathogenic	rs587779852	.	6.61e-05	4.88e-05	COSM1235424	1(haematopoietic_and_lymphoid_tissue)	Hereditary_cancer-predisposing_syndrome|Ataxia-telangiectasia_syndrome|not_provided	RCV000115219.7|RCV000205725.2|RCV000212035.2	NFE_BGR, NFE_SWE, NFE_ONF	3
11	108326152	108326152	-	A	frameshift_variant	coding	ATM	NM_000051.4	c.6908dup	p.Glu2304GlyfsTer69	Pathogenic	rs773570504	.	1.65e-05	1.63e-05	COSM301720	1(central_nervous_system)	.	.	FIN, NFE_NWE, NFE_SWE	3
11	108330362	108330362	C	T	stop_gained	coding	ATM	NM_000051.4	c.7456C>T	p.Arg2486Ter	Pathogenic/Likely_pathogenic	rs587779865	.	.	1.22e-05	COSM1351003;COSM1351002	1(stomach);1(upper_aerodigestive_tract)	Hereditary_cancer-predisposing_syndrome|not_provided|Ataxia-telangiectasia_syndrome	RCV000115251.5|RCV000212068.1|RCV000462583.1	CHN, AMR, SAS	3
11	108332765	108332765	C	T	stop_gained	coding	ATM	NM_000051.4	c.7792C>T	p.Arg2598Ter	Pathogenic/Likely_pathogenic	rs138941496	.	8.58e-06	8.17e-06	COSM1585338;COSM922742	1(stomach);1(endometrium)	not_provided	RCV000256020.1	AMR, NFE_SEU, NFE_ONF	3
11	108335105	108335105	T	C	missense_variant	coding	ATM	NM_000051.4	c.8147T>C	p.Val2716Ala	Pathogenic/Likely_pathogenic	rs587782652	.	4.12e-05	2.84e-05	.	.	Hereditary_cancer-predisposing_syndrome|Ataxia-telangiectasia_syndrome|not_provided	RCV000132066.6|RCV000169105.4|RCV000212079.3	FIN, NFE_NWE, NFE_SEU	3
11	108343338	108343347	TTTCAGTGCC	-	frameshift_variant	coding	ATM	NM_000051.4	c.8395_8404del	p.Phe2799LysfsTer4	Pathogenic/Likely_pathogenic	rs786202800	.	8.24e-06	2.03e-05	.	.	Hereditary_cancer-predisposing_syndrome|Ataxia-telangiectasia_syndrome|not_provided	RCV000165801.2|RCV000204163.2|RCV000255017.2	NFE_NWE, NFE_ONF, SAS	3
11	22625414	22625460	GGCTCTCTTGGAGTGTCTCCTCATCGGCGTCCCGGACGCCCGGGCCG	-	frameshift_variant	coding	FANCF	NM_022725.4	c.351_397del	p.Gly120ProfsTer17	Pathogenic	rs777098449	.	1.68e-05	2.04e-05	.	.	Fanconi_anemia\x2c_complementation_group_F	RCV000006713.5	AMR, NFE_NWE, NFE_ONF	3
11	94437206	94437206	G	A	stop_gained	coding	MRE11	NM_005591.4	c.1897C>T	p.Arg633Ter	Pathogenic	rs137852759	.	2.48e-05	2.85e-05	.	.	Ataxia-telangiectasia-like_disorder_1	RCV000009327.2	JPN, AMR, SAS	3
11	94467821	94467821	G	A	stop_gained	coding	MRE11	NM_005591.4	c.1090C>T	p.Arg364Ter	Pathogenic	rs371077728	.	4.95e-05	4.47e-05	COSM4037698;COSM4037699	1(stomach)	Hereditary_cancer-predisposing_syndrome\x2cnot_specified|Hereditary_cancer-predisposing_syndrome\x2cHereditary_cancer-predisposing_syndrome	RCV000129234.5\x2cRCV000115902.2|RCV000220133.1\x2cRCV000166423.1	EAS_OEA, NFE_NWE, SAS	3
12	101729109	101729109	A	G	splice_region_variant,synonymous_variant	coding	SYCP3	NM_001177949.2	c.657T>C	p.Thr219=	Pathogenic	rs769825641	.	6.83e-05	5.32e-05	.	.	Spermatogenesis_arrest	RCV000005704.3	CHN, JPN, KOR(EAS_KOR)	3
13	102866725	102866725	G	A	missense_variant	coding	BIVM-ERCC5	NM_001204425.2	c.3775G>A	p.Gly1259Arg	Pathogenic	.	.	.	1.22e-05	.	.	.	.	EAS_OEA, NFE_SWE, SAS	3
13	102866725	102866725	G	A	missense_variant	coding	ERCC5	NM_000123.4	c.2413G>A	p.Gly805Arg	Pathogenic	.	.	.	1.22e-05	.	.	.	.	EAS_OEA, NFE_SWE, SAS	3
13	108208685	108208685	G	A	missense_variant	coding	LIG4	NM_206937.2	c.2584C>T	p.His862Tyr	Likely_pathogenic	rs201176444	.	1.65e-05	1.63e-05	.	.	.	.	NFE_NWE, NFE_SWE, NFE_ONF	3
13	108210124	108210125	AG	-	frameshift_variant	coding	LIG4	NM_206937.2	c.1144_1145del	p.Leu382GlufsTer5	Likely_pathogenic	.	.	.	8.15e-06	.	.	.	.	CHN, EAS_OEA, FIN	3
13	108210436	108210436	C	T	missense_variant	coding	LIG4	NM_206937.2	c.833G>A	p.Arg278His	Pathogenic	rs104894421	.	.	1.22e-05	COSM3716412	1(prostate)	Lig4_syndrome	RCV000008114.2	FIN, NFE_NWE, NFE_ONF	3
13	32380043	32380043	C	T	missense_variant	coding	BRCA2	NM_000059.4	c.9154C>T	p.Arg3052Trp	Pathogenic	rs45580035	.	8.28e-06	1.22e-05	.	.	Hereditary_breast_and_ovarian_cancer_syndrome|Breast-ovarian_cancer\x2c_familial_2|Hereditary_cancer-predisposing_syndrome|Breast-ovarian_cancer\x2c_familial_1|not_provided	RCV000045732.4|RCV000077461.5|RCV000163027.2|RCV000210144.1|RCV000221843.2	AMR, NFE_NWE, SAS	3
14	45175337	45175340	AAAA	-	frameshift_variant	coding	FANCM	NM_020937.4	c.2586_2589del	p.Lys863IlefsTer12	Pathogenic/Likely_pathogenic	rs768006618	.	2.55e-05	2.35e-05	.	.	.	.	ICE, AMR, NFE_ONF	3
15	89281249	89281249	T	A	stop_gained	coding	FANCI	NM_001113378.2	c.1461T>A	p.Tyr487Ter	Pathogenic	rs769248873	.	4.12e-05	2.84e-05	.	.	Fanconi_anemia	RCV000460384.1	AFR, NFE_NWE, NFE_ONF	3
15	89290231	89290231	C	T	stop_gained	coding	FANCI	NM_001113378.2	c.1840C>T	p.Arg614Ter	Pathogenic	rs551399966	0.0002	2.47e-05	1.63e-05	.	.	.	.	CHN, KOR(EAS_KOR), AFR	3
15	89303898	89303898	G	A	missense_variant	coding	FANCI	NM_001113378.2	c.3041G>A	p.Cys1014Tyr	Likely_pathogenic	rs140404896	.	7.42e-05	0.0001	.	.	.	.	FIN, NFE_SWE, NFE_ONF	3
15	89307643	89307644	CT	-	frameshift_variant	coding	FANCI	NM_001113378.2	c.3622_3623del	p.Leu1208ValfsTer11	Pathogenic	rs796106594	.	3.3e-05	2.84e-05	.	.	.	.	AMR, NFE_SEU, NFE_SWE	3
15	89315318	89315318	C	T	stop_gained	coding	FANCI	NM_001113378.2	c.3853C>T	p.Arg1285Ter	Pathogenic	rs121918164	.	4.94e-05	4.47e-05	.	.	Fanconi_anemia\x2c_complementation_group_I	RCV000001024.5	NFE_BGR, NFE_ONF, SAS	3
15	90747491	90747491	G	T	splice_donor_variant	coding	BLM	NM_000057.4	c.98+1G>T	-	Pathogenic/Likely_pathogenic	rs750293380	.	1.42e-05	1.33e-05	.	.	Bloom_syndrome\x2cBloom_syndrome	RCV000409688.1\x2cRCV000410622.1	AMR, NFE_SEU, NFE_ONF	3
15	90749586	90749586	-	T	frameshift_variant	coding	BLM	NM_000057.4	c.320dup	p.Leu107PhefsTer36	Pathogenic/Likely_pathogenic	rs781221411	.	8.25e-06	1.22e-05	.	.	.	.	CHN, JPN, KOR(EAS_KOR)	3
15	90763016	90763016	C	T	stop_gained	coding	BLM	NM_000057.4	c.1933C>T	p.Gln645Ter	Pathogenic	rs373525781	.	4.14e-05	4.08e-05	.	.	.	.	NFE_NWE, NFE_SWE, NFE_ONF	3
15	90784953	90784953	C	T	stop_gained	coding	BLM	NM_000057.4	c.2695C>T	p.Arg899Ter	Pathogenic/Likely_pathogenic	rs587779884	.	6.59e-05	6.09e-05	COSM3690618	1(large_intestine)	not_provided|Bloom_syndrome	RCV000115298.4|RCV000169191.1	NFE_NWE, NFE_SWE, NFE_ONF	3
16	1502932	1502932	T	G	missense_variant,splice_region_variant	coding	TELO2	NM_016111.4	c.1772T>G	p.Val591Gly	Likely_pathogenic	rs142217951	.	2.48e-05	3.68e-05	.	.	.	.	AFR, NFE_NWE, NFE_ONF	3
16	2040142	2040142	C	T	stop_gained	coding	NTHL1	NM_002528.7	c.782G>A	p.Trp261Ter	Likely_pathogenic	rs753029097	.	1.65e-05	2.03e-05	.	.	.	.	ASJ, NFE_BGR, NFE_ONF	3
16	2043727	2043727	C	T	splice_acceptor_variant	coding	NTHL1	NM_002528.7	c.526-1G>A	-	Pathogenic/Likely_pathogenic	rs779757251	.	3.37e-05	8.61e-05	.	.	.	.	AMR, NFE_NWE, NFE_ONF	3
16	2044722	2044722	G	A	stop_gained	coding	NTHL1	NM_002528.7	c.433C>T	p.Arg145Ter	Pathogenic	rs374489979	.	2.73e-05	1.24e-05	.	.	.	.	JPN, NFE_SEU, SAS	3
16	2046132	2046132	G	-	frameshift_variant	coding	NTHL1	NM_002528.7	c.350del	p.Pro117GlnfsTer12	Pathogenic	.	.	.	1.63e-05	.	.	.	.	ICE, AFR, AMR	3
16	23603471	23603471	G	C	stop_gained	coding	PALB2	NM_024675.4	c.3549C>G	p.Tyr1183Ter	Pathogenic/Likely_pathogenic	rs118203998	.	1.65e-05	1.63e-05	.	.	Fanconi_anemia\x2c_complementation_group_N|Breast_cancer\x2c_susceptibility_to|Familial_cancer_of_breast|Pancreatic_cancer_3|not_specified|Hereditary_cancer-predisposing_syndrome|not_provided\x2cHereditary_cancer-predisposing_syndrome|Familial_cancer_of_breast|not_provided	RCV000001304.2|RCV000001305.2|RCV000114634.6|RCV000114635.1|RCV000121742.1|RCV000129158.7|RCV000212830.2\x2cRCV000116108.8|RCV000200012.3|RCV000212831.2	NFE_BGR, NFE_NWE, NFE_ONF	3
16	23607958	23607958	G	A	stop_gained	coding	PALB2	NM_024675.4	c.3256C>T	p.Arg1086Ter	Pathogenic/Likely_pathogenic	rs587776527	.	8.24e-06	2.03e-05	.	.	Pancreatic_cancer_3|Hereditary_cancer-predisposing_syndrome|Familial_cancer_of_breast|not_provided\x2cFamilial_cancer_of_breast	RCV000114612.3|RCV000160853.4|RCV000168017.3|RCV000212825.2\x2cRCV000461441.1	AFR, NFE_NWE, NFE_SWE	3
16	23621362	23621362	C	T	stop_gained,splice_region_variant	coding	PALB2	NM_024675.4	c.3113G>A	p.Trp1038Ter	Pathogenic/Likely_pathogenic	rs180177132	.	2.48e-05	6.09e-05	.	.	Familial_cancer_of_breast|Hereditary_cancer-predisposing_syndrome|Breast_cancer\x2c_susceptibility_to|not_provided	RCV000114591.11|RCV000116096.9|RCV000144703.3|RCV000212822.3	AFR, NFE_NWE, NFE_ONF	3
16	23629897	23629897	G	A	stop_gained	coding	PALB2	NM_024675.4	c.2257C>T	p.Arg753Ter	Pathogenic	rs180177110	.	3.3e-05	2.44e-05	COSM5752634	1(breast)	Hereditary_cancer-predisposing_syndrome|not_provided|Familial_cancer_of_breast\x2cHereditary_cancer-predisposing_syndrome	RCV000131502.3|RCV000236519.2|RCV000466579.1\x2cRCV000221875.1	CHN, NFE_NWE, NFE_SWE	3
16	23629986	23629987	AT	-	frameshift_variant	coding	PALB2	NM_024675.4	c.2167_2168del	p.Met723ValfsTer21	Pathogenic	rs587776416	.	6.59e-05	6.09e-05	.	.	Familial_cancer_of_breast|Hereditary_cancer-predisposing_syndrome|not_provided	RCV000123337.4|RCV000129400.5|RCV000133478.3	AMR, NFE_SEU, NFE_ONF	3
16	23635306	23635306	G	A	stop_gained	coding	PALB2	NM_024675.4	c.1240C>T	p.Arg414Ter	Pathogenic	rs180177100	.	.	8.14e-06	.	.	Hereditary_cancer-predisposing_syndrome|Familial_cancer_of_breast|not_provided	RCV000116064.6|RCV000123331.5|RCV000254674.2	CHN, AMR, NFE_SWE	3
16	23636036	23636037	TC	-	frameshift_variant	coding	PALB2	NM_024675.4	c.509_510del	p.Arg170IlefsTer14	Pathogenic	rs515726124	.	5.77e-05	3.25e-05	.	.	Familial_cancer_of_breast|Pancreatic_cancer_3|Hereditary_cancer-predisposing_syndrome|not_provided|PALB2-Related_Disorders	RCV000114645.6|RCV000114646.1|RCV000130658.7|RCV000212776.2|RCV000363454.1	NFE_NWE, NFE_SWE, NFE_ONF	3
16	89740015	89740015	G	A	missense_variant	coding	FANCA	NM_000135.4	c.3913C>T	p.Leu1305Phe	Likely_pathogenic	rs753700179	.	1.65e-05	1.22e-05	.	.	.	.	AFR, AMR, SAS	3
16	89749806	89749806	G	A	missense_variant	coding	FANCA	NM_000135.4	c.3163C>T	p.Arg1055Trp	Pathogenic/Likely_pathogenic	rs753063086	.	3.3e-05	2.03e-05	.	.	.	.	AFR, NFE_NWE, SAS	3
16	89765062	89765062	T	G	missense_variant	coding	FANCA	NM_000135.4	c.2606A>C	p.Gln869Pro	Pathogenic/Likely_pathogenic	rs780825099	.	1.65e-05	1.22e-05	.	.	Fanconi_anemia	RCV000199923.1	NFE_NWE, NFE_SWE, NFE_ONF	3
16	89767206	89767207	AG	-	frameshift_variant	coding	FANCA	NM_000135.4	c.2535_2536del	p.Cys846GlnfsTer20	Pathogenic	rs763378933	.	8.28e-06	8.13e-06	.	.	.	.	CHN, AMR, NFE_SEU	3
16	89782870	89782870	C	-	frameshift_variant	coding	FANCA	NM_000135.4	c.1615del	p.Asp539ThrfsTer66	Pathogenic	rs778507965	.	6.61e-05	4.06e-05	.	.	Fanconi_anemia\x2c_complementation_group_A	RCV000003612.3	NFE_NWE, NFE_SWE, NFE_ONF	3
16	89816615	89816615	T	G	start_lost	coding	FANCA	NM_000135.4	c.1A>C	p.Met1?	Likely_pathogenic	rs772751654	.	8.28e-05	2.57e-05	.	.	.	.	CHN, AMR, SAS	3
17	35103298	35103298	G	A	stop_gained	coding	RAD51D	NM_002878.3	c.694C>T	p.Arg232Ter	Pathogenic	rs587780104	.	1.09e-05	1.66e-05	.	.	Hereditary_cancer-predisposing_syndrome|not_provided|Breast-ovarian_cancer\x2c_familial_4	RCV000115819.7|RCV000212965.2|RCV000410860.1	NFE_NWE, NFE_SEU, NFE_ONF	3
17	43063903	43063903	G	T	missense_variant	coding	BRCA1	NM_007294.4	c.5123C>A	p.Ala1708Glu	Pathogenic	rs28897696	.	2.49e-05	2.03e-05	.	.	Breast-ovarian_cancer\x2c_familial_1|Hereditary_breast_and_ovarian_cancer_syndrome|Hereditary_cancer-predisposing_syndrome|Breast_and/or_ovarian_cancer|not_specified\x2cnot_provided|Breast-ovarian_cancer\x2c_familial_1|Hereditary_cancer-predisposing_syndrome|Hereditary_breast_and_ovarian_cancer_syndrome|Breast_cancer|Familial_cancer_of_breast	RCV000031221.5|RCV000048803.6|RCV000131166.3|RCV000148393.1|RCV000212194.2\x2cRCV000048802.6|RCV000077599.6|RCV000131831.3|RCV000167826.4|RCV000413608.1|RCV000457403.1	AMR, NFE_NWE, NFE_SEU	3
17	43067608	43067608	C	G	missense_variant,splice_region_variant	coding	BRCA1	NM_007294.4	c.5074G>C	p.Asp1692His	Pathogenic	rs80187739	.	8.26e-06	1.22e-05	.	.	Familial_cancer_of_breast|Breast-ovarian_cancer\x2c_familial_1\x2cBreast-ovarian_cancer\x2c_familial_1|Hereditary_breast_and_ovarian_cancer_syndrome|Hereditary_cancer-predisposing_syndrome|not_provided\x2cBreast-ovarian_cancer\x2c_familial_1|Familial_cancer_of_breast|Hereditary_cancer-predisposing_syndrome|not_provided	RCV000048769.2|RCV000112484.1\x2cRCV000031214.4|RCV000048768.3|RCV000220578.1|RCV000256114.2\x2cRCV000031213.5|RCV000048767.2|RCV000217586.1|RCV000255870.1	AMR, ASJ, NFE_SEU	3
17	43082434	43082434	G	A	stop_gained	coding	BRCA1	NM_007294.4	c.4327C>T	p.Arg1443Ter	Pathogenic	rs41293455	.	1.65e-05	2.44e-05	COSM979730;COSM4870621	1(salivary_gland);1(breast);1(endometrium)	Breast-ovarian_cancer\x2c_familial_1|Hereditary_breast_and_ovarian_cancer_syndrome|Hereditary_cancer-predisposing_syndrome|Familial_cancer_of_breast|not_provided|not_specified\x2cBreast-ovarian_cancer\x2c_familial_1|Hereditary_breast_and_ovarian_cancer_syndrome|Hereditary_cancer-predisposing_syndrome|not_specified	RCV000019244.14|RCV000048523.7|RCV000131880.3|RCV000159989.2|RCV000235131.2|RCV000239083.1\x2cRCV000019245.7|RCV000048522.4|RCV000129043.3|RCV000427206.1	AMR, FIN, NFE_NWE	3
17	43091760	43091761	CT	-	frameshift_variant	coding	BRCA1	NM_007294.4	c.3770_3771del	p.Glu1257GlyfsTer9	Pathogenic	rs80357993	.	8.24e-06	8.13e-06	.	.	Breast-ovarian_cancer\x2c_familial_1|Hereditary_breast_and_ovarian_cancer_syndrome|Hereditary_cancer-predisposing_syndrome|not_provided	RCV000031127.12|RCV000048325.6|RCV000131814.3|RCV000235232.2	CHN, NFE_SEU, SAS	3
17	43091924	43091924	G	A	stop_gained	coding	BRCA1	NM_007294.4	c.3607C>T	p.Arg1203Ter	Pathogenic	rs62625308	.	.	1.22e-05	.	.	Breast-ovarian_cancer\x2c_familial_1|Hereditary_breast_and_ovarian_cancer_syndrome|Hereditary_cancer-predisposing_syndrome|Breast_cancer|not_provided|Familial_cancer_of_breast\x2cFamilial_cancer_of_breast|Breast-ovarian_cancer\x2c_familial_1	RCV000019240.12|RCV000048251.7|RCV000131818.3|RCV000148389.1|RCV000159978.3|RCV000239343.1\x2cRCV000048250.2|RCV000112133.1	EAS_OEA, NFE_NWE, NFE_ONF	3
17	58694964	58694965	CT	-	frameshift_variant	coding	RAD51C	NM_058216.3	c.181_182del	p.Leu61AlafsTer11	Pathogenic	rs786203945	.	3.3e-05	1.62e-05	.	.	Hereditary_cancer-predisposing_syndrome|Fanconi_anemia\x2c_complementation_group_O	RCV000167466.1|RCV000456496.1	FIN, NFE_ONF, SAS	3
17	58724038	58724039	AG	-	splice_acceptor_variant	coding	RAD51C	NM_058216.3	c.905-2_905-1del	-	Pathogenic/Likely_pathogenic	rs587781995	.	1.66e-05	1.22e-05	.	.	Hereditary_cancer-predisposing_syndrome|not_provided	RCV000130408.3|RCV000236611.2	EAS_OEA, NFE_SEU, SAS	3
17	58724090	58724090	C	T	stop_gained	coding	RAD51C	NM_058216.3	c.955C>T	p.Arg319Ter	Pathogenic	rs587781287	.	8.31e-06	8.13e-06	.	.	Hereditary_cancer-predisposing_syndrome|Fanconi_anemia\x2c_complementation_group_O	RCV000128973.4|RCV000230603.1	CHN, AFR, NFE_ONF	3
17	61686054	61686057	ATGG	-	frameshift_variant	coding	BRIP1	NM_032043.3	c.2684_2687del	p.Ser895Ter	Pathogenic	rs760551339	.	1.65e-05	1.22e-05	.	.	Familial_cancer_of_breast|Fanconi_anemia\x2c_complementation_group_J	RCV000232131.2|RCV000232131.2	AFR, NFE_NWE, NFE_SEU	3
17	61799125	61799125	G	A	stop_gained	coding	BRIP1	NM_032043.3	c.1315C>T	p.Arg439Ter	Pathogenic	rs587780226	.	.	1.22e-05	.	.	not_provided|Hereditary_cancer-predisposing_syndrome	RCV000116121.5|RCV000210150.1	CHN, EAS_OEA, NFE_ONF	3
17	61808752	61808752	A	-	frameshift_variant	coding	BRIP1	NM_032043.3	c.633del	p.Gly212AlafsTer62	Pathogenic	rs779466229	.	2.49e-05	1.64e-05	.	.	Hereditary_cancer-predisposing_syndrome	RCV000215252.1	NFE_NWE, NFE_SEU, NFE_SWE	3
17	7673803	7673803	G	A	missense_variant	coding	TP53	NM_000546.6	c.817C>T	p.Arg273Cys	Pathogenic/Likely_pathogenic	rs121913343	.	8.89e-06	1.22e-05	COSM99933;COSM10659;COSM3355991;COSM1645518	1(salivary_gland);1(pleura);8(vulva);36(ovary);12(bone);26(breast);1(penis);36(stomach);41(haematopoietic_and_lymphoid_tissue);14(urinary_tract);2(kidney);23(pancreas);1(peritoneum);22(liver);1(genital_tract);28(oesophagus);4(adrenal_gland);12(skin);15(prostate);20(lung);4(thyroid);5(cervix);33(upper_aerodigestive_tract);1(eye);147(large_intestine);176(central_nervous_system);7(small_intestine);7…	Hereditary_cancer-predisposing_syndrome|Li-Fraumeni_syndrome_1|Malignant_tumor_of_prostate|Li-Fraumeni_syndrome|not_provided|Neoplasm_of_breast|Neoplasm|Hepatocellular_carcinoma|Acute_myeloid_leukemia\x2cAdenocarcinoma_of_lung|Glioblastoma|Ovarian_Serous_Cystadenocarcinoma|Chronic_lymphocytic_leukemia|Malignant_neoplasm_of_body_of_uterus|Hepatocellular_carcinoma|Neoplasm_of_brain|Medulloblastoma|…	RCV000131966.4|RCV000144665.4|RCV000149051.1|RCV000205625.1|RCV000254692.1|RCV000421090.1|RCV000431786.1|RCV000432002.1|RCV000442470.1\x2cRCV000418085.1|RCV000420280.1|RCV000420482.1|RCV000422550.1|RCV000422795.1|RCV000424918.1|RCV000425669.1|RCV000427515.1|RCV000427884.1|RCV000430119.1|RCV000431180.1|RCV000431455.1|RCV000432372.1|RCV000433489.1|RCV000435074.1|RCV000435480.1|RCV000436543.1|RCV000…	KOR(EAS_KOR), FIN, NFE_BGR	3
17	7674220	7674220	C	T	missense_variant	coding	TP53	NM_000546.6	c.743G>A	p.Arg248Gln	Pathogenic	rs11540652	.	5.77e-05	2.03e-05	COSM99602;COSM99021;COSM99020;COSM3356964;COSM1640830;COSM10662	2(salivary_gland);1(pleura);8(vulva);37(ovary);7(bone);77(breast);5(NS);49(stomach);83(haematopoietic_and_lymphoid_tissue);1(soft_tissue);4(kidney);37(urinary_tract);21(pancreas);1(peritoneum);9(liver);1(genital_tract);47(oesophagus);1(pituitary);2(adrenal_gland);18(skin);25(prostate);33(lung);4(cervix);5(thyroid);46(upper_aerodigestive_tract);1(eye);171(large_intestine);54(central_nervous_system…	Hereditary_cancer-predisposing_syndrome|Uterine_Carcinosarcoma|Transitional_cell_carcinoma_of_the_bladder|Neoplasm_of_brain|Squamous_cell_carcinoma_of_lung|Brainstem_glioma|Medulloblastoma|Myelodysplastic_syndrome|Pancreatic_adenocarcinoma|Squamous_cell_carcinoma_of_the_head_and_neck|Adenocarcinoma_of_lung|Acute_myeloid_leukemia|Chronic_lymphocytic_leukemia|Ovarian_Serous_Cystadenocarcinoma|Adeno…	RCV000219834.1|RCV000417894.1|RCV000418531.1|RCV000422303.1|RCV000422821.1|RCV000423159.1|RCV000423468.1|RCV000424119.1|RCV000424394.1|RCV000427307.1|RCV000428586.1|RCV000429221.1|RCV000430044.1|RCV000433237.1|RCV000433865.1|RCV000434177.1|RCV000435101.1|RCV000435726.1|RCV000437940.1|RCV000439516.1|RCV000439901.1|RCV000440686.1|RCV000443630.1|RCV000443712.1|RCV000445145.1|RCV000445266.1\x2cRCV000…	CHN, NFE_SWE, NFE_ONF	3
17	7674250	7674250	C	T	missense_variant	coding	TP53	NM_000546.6	c.713G>A	p.Cys238Tyr	Pathogenic/Likely_pathogenic	rs730882005	.	1.65e-05	8.12e-06	COSM179813;COSM179811;COSM1649400;COSM11059;COSM179812;COSM3388191	5(ovary);1(bone);14(breast);3(stomach);13(haematopoietic_and_lymphoid_tissue);5(soft_tissue);9(pancreas);10(oesophagus);1(skin);2(lung);1(upper_aerodigestive_tract);12(large_intestine);6(central_nervous_system);3(endometrium)	Neoplasm_of_breast|Malignant_neoplasm_of_body_of_uterus|Pancreatic_adenocarcinoma|Multiple_myeloma|Adenocarcinoma_of_lung|Neoplasm_of_brain|Squamous_cell_carcinoma_of_the_head_and_neck|Adenocarcinoma_of_stomach|Uterine_Carcinosarcoma|Hepatocellular_carcinoma|Ovarian_Serous_Cystadenocarcinoma|Uterine_cervical_neoplasms|Chronic_lymphocytic_leukemia|Colorectal_Neoplasms|Oesophageal_carcinoma|Gliobla…	RCV000417498.1|RCV000418555.1|RCV000422481.1|RCV000422719.1|RCV000425072.1|RCV000427235.1|RCV000427531.1|RCV000428817.1|RCV000432745.1|RCV000433862.1|RCV000433989.1|RCV000435149.1|RCV000435343.1|RCV000439349.1|RCV000440369.1|RCV000442469.1|RCV000444988.1|RCV000473420.1\x2cRCV000418923.1|RCV000419485.1|RCV000423226.1|RCV000424302.1|RCV000424531.1|RCV000425465.1|RCV000425867.1|RCV000429749.1|RCV000…	JPN, NFE_SWE, NFE_ONF	3
19	12810355	12810355	G	-	frameshift_variant	coding	RNASEH2A	NM_006397.3	c.589del	p.Glu197ArgfsTer24	Pathogenic	rs781284373	.	9.06e-05	6.5e-05	.	.	.	.	FIN, NFE_NWE, NFE_SWE	3
19	45352511	45352511	C	T	missense_variant	coding	ERCC2	NM_000400.4	c.2041G>A	p.Asp681Asn	Pathogenic	rs121913023	.	.	2.03e-05	.	.	Cerebrooculofacioskeletal_syndrome_2	RCV000018277.27	CHN, NFE_NWE, NFE_ONF	3
19	45352646	45352646	G	A	missense_variant	coding	ERCC2	NM_000400.4	c.1906C>T	p.Arg636Trp	Likely_pathogenic	rs773359656	.	2.49e-05	2.44e-05	.	.	.	.	JPN, AMR, SAS	3
22	28695133	28695133	-	T	frameshift_variant	coding	CHEK2	NM_007194.4	c.1368dup	p.Glu457ArgfsTer33	Pathogenic/Likely_pathogenic	rs730881700	.	5.02e-05	2.44e-05	.	.	Hereditary_cancer-predisposing_syndrome|not_provided|Familial_cancer_of_breast	RCV000160450.4|RCV000212460.2|RCV000473927.1	NFE_NWE, NFE_SEU, NFE_ONF	3
22	28695239	28695239	A	-	frameshift_variant	coding	CHEK2	NM_007194.4	c.1263del	p.Ser422ValfsTer15	Pathogenic/Likely_pathogenic	rs587780174	.	5.21e-05	4.89e-05	.	.	Hereditary_cancer-predisposing_syndrome|Familial_cancer_of_breast|not_provided	RCV000115992.6|RCV000198820.3|RCV000212457.2	AFR, NFE_NWE, NFE_ONF	3
22	28724978	28724978	T	-	frameshift_variant,splice_region_variant	coding	CHEK2	NM_007194.4	c.591del	p.Val198PhefsTer7	Pathogenic/Likely_pathogenic	rs587782245	.	8.27e-06	2.03e-05	.	.	Hereditary_cancer-predisposing_syndrome|Familial_cancer_of_breast|not_provided	RCV000130949.5|RCV000204563.2|RCV000235159.2	AFR, NFE_BGR, NFE_NWE	3
22	28725278	28725278	G	A	stop_gained	coding	CHEK2	NM_007194.4	c.409C>T	p.Arg137Ter	Pathogenic	rs730881701	.	3.3e-05	2.44e-05	.	.	Hereditary_cancer-predisposing_syndrome|Familial_cancer_of_breast|not_provided	RCV000160452.1|RCV000229303.1|RCV000254656.2	CHN, NFE_SEU, SAS	3
22	28734401	28734401	A	T	splice_donor_variant	coding	CHEK2	NM_007194.4	c.319+2T>A	-	Pathogenic/Likely_pathogenic	rs587782401	.	5.85e-05	7.32e-05	.	.	Hereditary_cancer-predisposing_syndrome|not_provided	RCV000131434.6|RCV000212411.2	FIN, NFE_SWE, NFE_ONF	3

## Sheet: S3D
Supplementary Table 3D. Deleterious variants shared in 4 populations
Chr	Start	End	Ref	Alt	Consequence	Region	Symbol	Feature	HGVSc	HGVSp	ClinVar_SIG_20210501	dbSNP	1000G_ALL	ExAC_Freq	gnomAD_exome_ALL	COSMIC_ID	COSMIC_DIS	ClinVar_DIS	ClinVar_ID	Shared_ethnicity	Total
1	45332242	45332242	C	T	missense_variant	coding	MUTYH	NM_001048174.2	c.773G>A	p.Gly258Glu	Pathogenic/Likely_pathogenic	rs730881833	.	2.5e-05	2.44e-05	.	.	not_provided|MYH-associated_polyposis|Hereditary_cancer-predisposing_syndrome	RCV000160754.2|RCV000191933.1|RCV000221854.1	CHN, JPN, KOR(EAS_KOR), SAS	4
2	127272929	127272929	-	C	frameshift_variant	coding	ERCC3	NM_000122.2	c.1762dup	p.Glu588GlyfsTer16	Pathogenic/Likely_pathogenic	rs770925947	.	4.94e-05	4.06e-05	.	.	.	.	NFE_NWE, NFE_SEU, NFE_ONF, SAS	4
2	127280552	127280552	-	T	frameshift_variant	coding	ERCC3	NM_000122.2	c.1421dup	p.Asp474GlufsTer2	Pathogenic	rs587778281	.	6.62e-05	7.31e-05	COSM5990026	1(haematopoietic_and_lymphoid_tissue)	not_specified	RCV000120802.1	AMR, NFE_NWE, NFE_SEU, NFE_ONF	4
2	214730457	214730457	-	CATACTTTTCTTCCTGTTCA	frameshift_variant	coding	BARD1	NM_000465.4	c.1935_1954dup	p.Glu652ValfsTer69	Pathogenic/Likely_pathogenic	rs587780024	.	8.24e-05	6.09e-05	.	.	Hereditary_cancer-predisposing_syndrome|Familial_cancer_of_breast	RCV000115621.5|RCV000200198.3	FIN, NFE_NWE, NFE_SWE, NFE_ONF	4
2	214730491	214730491	G	A	stop_gained	coding	BARD1	NM_000465.4	c.1921C>T	p.Arg641Ter	Pathogenic	rs587781948	.	8.25e-06	1.63e-05	.	.	Hereditary_cancer-predisposing_syndrome|Familial_cancer_of_breast|not_provided	RCV000130318.3|RCV000234673.2|RCV000236005.1	CHN, AFR, NFE_NWE, NFE_SEU	4
2	214780658	214780658	G	A	stop_gained	coding	BARD1	NM_000465.4	c.1216C>T	p.Arg406Ter	Pathogenic/Likely_pathogenic	rs377153250	.	2.47e-05	1.63e-05	.	.	Hereditary_cancer-predisposing_syndrome\x2cHereditary_cancer-predisposing_syndrome|not_specified	RCV000217217.1\x2cRCV000130569.5|RCV000212125.1	CHN, AFR, NFE_SEU, NFE_SWE	4
2	47800889	47800889	A	G	missense_variant	coding	MSH6	NM_000179.3	c.2906A>G	p.Tyr969Cys	Likely_pathogenic	rs63749919	.	1.69e-05	1.26e-05	.	.	Lynch_syndrome\x2cnot_provided|Lynch_syndrome\x2cHereditary_cancer-predisposing_syndrome|Lynch_syndrome|Hereditary_nonpolyposis_colorectal_cancer_type_5	RCV000074786.2\x2cRCV000218181.2|RCV000458194.1\x2cRCV000129763.3|RCV000204094.2|RCV000410024.1	CHN, NFE_NWE, NFE_SWE, SAS	4
2	58241312	58241312	A	G	start_lost	coding	FANCL	NM_018062.4	c.2T>C	p.Met1?	Likely_pathogenic	rs761291501	.	5.14e-05	4.48e-05	.	.	.	.	NFE_BGR, NFE_NWE, NFE_SEU, NFE_ONF	4
3	10043483	10043483	G	A	splice_acceptor_variant	coding	FANCD2	NM_001018115.3	c.990-1G>A	-	Pathogenic	rs112832879	.	0.0002	4.88e-05	.	.	not_provided	RCV000421802.1	CHN, AFR, AMR, NFE_SWE	4
3	14168330	14168330	G	A	stop_gained	coding	XPC	NM_004628.5	c.463C>T	p.Arg155Ter	Pathogenic	rs755825264	.	1.66e-05	1.63e-05	.	.	.	.	FIN, NFE_BGR, NFE_SEU, NFE_SWE	4
3	37048973	37048973	C	T	missense_variant	coding	MLH1	NM_000249.4	c.2059C>T	p.Arg687Trp	Pathogenic	rs63751275	.	2.48e-05	2.03e-05	.	.	Lynch_syndrome\x2cLynch_syndrome|Hereditary_cancer-predisposing_syndrome|Lynch_syndrome_II	RCV000475409.1\x2cRCV000075499.3|RCV000215428.1|RCV000411954.1	JPN, AFR, NFE_SWE, SAS	4
3	37048994	37048994	G	T	stop_gained	coding	MLH1	NM_000249.4	c.2080G>T	p.Glu694Ter	Likely_pathogenic	rs147542208	.	2.49e-05	1.63e-05	.	.	.	.	JPN, AMR, NFE_NWE, NFE_ONF	4
5	132609340	132609343	AAAG	-	frameshift_variant	coding	RAD50	NM_005732.4	c.2983_2986del	p.Glu995ArgfsTer2	Pathogenic	rs587782488	.	2.49e-05	4.48e-05	.	.	Hereditary_cancer-predisposing_syndrome	RCV000115951.3	CHN, AFR, EAS_OEA, NFE_NWE	4
5	132618134	132618134	C	T	stop_gained	coding	RAD50	NM_005732.4	c.3229C>T	p.Arg1077Ter	Pathogenic/Likely_pathogenic	rs368980595	.	1.65e-05	2.03e-05	COSM3850058;COSM3850059	1(stomach)	Hereditary_cancer-predisposing_syndrome\x2cHereditary_cancer-predisposing_syndrome	RCV000219691.1\x2cRCV000217668.1	AMR, FIN, NFE_ONF, SAS	4
5	60904792	60904792	C	T	missense_variant,splice_region_variant	coding	ERCC8	NM_000082.4	c.481G>A	p.Val161Ile	Likely_pathogenic	rs148393161	.	4.94e-05	3.67e-05	.	.	.	.	FIN, NFE_NWE, NFE_SWE, SAS	4
5	60944972	60944972	C	A	stop_gained	coding	ERCC8	NM_000082.4	c.37G>T	p.Glu13Ter	Pathogenic	rs121434324	.	3.3e-05	7.72e-05	.	.	Cockayne_syndrome_type_A	RCV000001786.3	ASJ, NFE_SEU, NFE_ONF, SAS	4
5	80768929	80768929	C	T	stop_gained	coding	MSH3	NM_002439.5	c.2179C>T	p.Arg727Ter	Pathogenic	rs376667075	.	3.31e-05	1.63e-05	.	.	.	.	CHN, AFR, NFE_SEU, SAS	4
6	158192107	158192107	C	T	stop_gained	coding	GTF2H5	NM_207118.3	c.166C>T	p.Arg56Ter	Pathogenic	rs121434364	.	3.3e-05	3.66e-05	.	.	Trichothiodystrophy_1\x2c_photosensitive|Trichothiodystrophy_3\x2c_photosensitive	RCV000002184.3|RCV000377505.1	AMR, NFE_NWE, NFE_ONF, SAS	4
6	43604637	43604637	C	T	stop_gained	coding	POLH	NM_006502.3	c.907C>T	p.Arg303Ter	Pathogenic	rs759607901	.	8.24e-06	1.22e-05	.	.	Xeroderma_pigmentosum\x2c_variant_type	RCV000209179.1	CHN, AMR, NFE_NWE, SAS	4
7	5992018	5992018	G	A	stop_gained	coding	PMS2	NM_000535.7	c.943C>T	p.Arg315Ter	Pathogenic	rs200640585	.	1.66e-05	2.03e-05	COSM3084729	1(skin)	Lynch_syndrome|Hereditary_cancer-predisposing_syndrome|Colorectal_cancer\x2c_non-polyposis|not_provided	RCV000076901.2|RCV000115711.4|RCV000148734.1|RCV000212858.1	KOR(EAS_KOR), AFR, ASJ, NFE_NWE	4
9	35075706	35075715	AAAACACCTC	-	frameshift_variant	coding	FANCG	NM_004629.2	c.1183_1192del	p.Glu395TrpfsTer5	Pathogenic	rs397507559	.	6.66e-05	6.58e-05	.	.	Fanconi_anemia\x2c_complementation_group_G	RCV000034123.2	FIN, NFE_NWE, NFE_SWE, NFE_ONF	4
9	95249225	95249225	C	-	frameshift_variant	coding	FANCC	NM_000136.3	c.67del	p.Asp23IlefsTer23	Pathogenic	rs104886459	.	6.6e-05	0.0001	.	.	Fanconi_anemia\x2c_complementation_group_C|not_provided|Fanconi_anemia	RCV000012829.4|RCV000058926.3|RCV000460906.1	NFE_NWE, NFE_SEU, NFE_SWE, NFE_ONF	4
9	97684977	97684977	G	A	stop_gained	coding	XPA	NM_000380.4	c.619C>T	p.Arg207Ter	Pathogenic	rs104894133	.	2.48e-05	2.44e-05	.	.	Xeroderma_pigmentosum\x2c_type_1	RCV000001051.2	AFR, NFE_SEU, NFE_SWE, SAS	4
10	49461473	49461473	G	A	stop_gained	coding	ERCC6	NM_000124.4	c.3862C>T	p.Arg1288Ter	Pathogenic	rs185142838	0.0002	5.84e-05	0.0001	COSM1251473	1(soft_tissue);1(oesophagus)	Cerebro-oculo-facio-skeletal_syndrome	RCV000024284.5	CHN, AMR, FIN, NFE_NWE	4
10	49474056	49474056	G	A	stop_gained	coding	ERCC6	NM_000124.4	c.2569C>T	p.Arg857Ter	Pathogenic	rs751448793	.	1.65e-05	2.44e-05	COSM1675221	3(large_intestine)	.	.	CHN, AMR, NFE_SEU, NFE_ONF	4
10	49530737	49530737	G	A	stop_gained	coding	ERCC6	NM_000124.4	c.526C>T	p.Arg176Ter	Likely_pathogenic	rs771781694	.	2.47e-05	2.03e-05	.	.	.	.	EAS_OEA, NFE_NWE, NFE_ONF, SAS	4
11	108251026	108251027	AG	-	frameshift_variant	coding	ATM	NM_000051.4	c.1564_1565del	p.Glu522IlefsTer43	Pathogenic	rs751357509	.	4.96e-05	5.28e-05	COSM4745905	1(haematopoietic_and_lymphoid_tissue)	Hereditary_cancer-predisposing_syndrome|Ataxia-telangiectasia_syndrome|not_provided	RCV000115144.6|RCV000169147.4|RCV000211964.3	NFE_BGR, NFE_NWE, NFE_SWE, NFE_ONF	4
11	108256340	108256340	G	A	splice_region_variant,synonymous_variant	coding	ATM	NM_000051.4	c.2250G>A	p.Lys750=	Pathogenic/Likely_pathogenic	rs1137887	.	8.27e-06	4.48e-05	.	.	Ataxia-telangiectasia_syndrome|Hereditary_cancer-predisposing_syndrome|not_provided	RCV000003185.9|RCV000115149.8|RCV000235101.1	AMR, NFE_NWE, NFE_SEU, NFE_ONF	4
11	108271147	108271147	G	A	splice_donor_variant	coding	ATM	NM_000051.4	c.2921+1G>A	-	Pathogenic/Likely_pathogenic	rs587781558	.	2.48e-05	2.44e-05	COSM146161;COSM1135094	2(haematopoietic_and_lymphoid_tissue);1(kidney)	Hereditary_cancer-predisposing_syndrome|Ataxia-telangiectasia_syndrome|not_provided\x2cAtaxia-telangiectasia_syndrome|Hereditary_cancer-predisposing_syndrome|not_provided\x2cHereditary_cancer-predisposing_syndrome|Ataxia-telangiectasia_syndrome	RCV000129576.4|RCV000169059.1|RCV000215085.2\x2cRCV000167947.2|RCV000217319.1|RCV000236109.2\x2cRCV000130866.3|RCV000233536.2	AFR, NFE_NWE, NFE_SEU, NFE_ONF	4
11	108315911	108315911	G	A	missense_variant,splice_region_variant	coding	ATM	NM_000051.4	c.6095G>A	p.Arg2032Lys	Pathogenic/Likely_pathogenic	rs139770721	.	4.12e-05	2.84e-05	.	.	Hereditary_cancer-predisposing_syndrome|Ataxia-telangiectasia_syndrome|not_provided	RCV000159742.4|RCV000167946.4|RCV000212037.2	NFE_EST, NFE_NWE, NFE_SWE, NFE_ONF	4
11	108331885	108331893	TCTAGAATT	-	inframe_deletion	coding	ATM	NM_000051.4	c.7638_7646del	p.Arg2547_Ser2549del	Pathogenic/Likely_pathogenic	rs587782444	.	1.65e-05	2.03e-05	COSM22478	1(haematopoietic_and_lymphoid_tissue)	Ataxia-telangiectasia\x2c_complementation_group_E|T-cell_prolymphocytic_leukemia|Hereditary_cancer-predisposing_syndrome|Ataxia-telangiectasia_syndrome|not_provided|Breast_cancer	RCV000003155.3|RCV000003163.5|RCV000185637.3|RCV000206671.4|RCV000212075.3|RCV000417362.1	AFR, NFE_NWE, NFE_SEU, NFE_ONF	4
11	108345818	108345818	C	T	missense_variant	coding	ATM	NM_000051.4	c.8494C>T	p.Arg2832Cys	Pathogenic/Likely_pathogenic	rs587779872	.	8.24e-06	2.85e-05	COSM1351027;COSM22488	1(breast);1(stomach);2(haematopoietic_and_lymphoid_tissue);1(skin);1(central_nervous_system)	Hereditary_cancer-predisposing_syndrome|Ataxia-telangiectasia_syndrome|not_provided	RCV000115265.6|RCV000169354.5|RCV000212084.2	AFR, NFE_NWE, NFE_ONF, SAS	4
11	22625326	22625327	AG	-	frameshift_variant	coding	FANCF	NM_022725.4	c.484_485del	p.Leu162AspfsTer103	Pathogenic	rs587778340	.	8.34e-05	7.72e-05	.	.	Fanconi_anemia\x2c_complementation_group_F|not_specified|Fanconi_anemia	RCV000006715.3|RCV000121020.1|RCV000342763.1	ICE, AFR, NFE_NWE, SAS	4
11	94447276	94447276	G	A	stop_gained	coding	MRE11	NM_005591.4	c.1726C>T	p.Arg576Ter	Pathogenic	rs774277300	.	3.3e-05	2.85e-05	.	.	Hereditary_cancer-predisposing_syndrome\x2cHereditary_cancer-predisposing_syndrome	RCV000163701.4\x2cRCV000166359.2	CHN, AMR, NFE_SWE, NFE_ONF	4
11	94447288	94447288	G	A	stop_gained	coding	MRE11	NM_005591.4	c.1714C>T	p.Arg572Ter	Pathogenic/Likely_pathogenic	rs137852761	.	7.41e-05	6.1e-05	COSM378985;COSM378984	1(lung)	Ataxia-telangiectasia-like_disorder_1|Hereditary_cancer-predisposing_syndrome	RCV000009329.3|RCV000130661.3	NFE_NWE, NFE_SWE, NFE_ONF, SAS	4
11	94476288	94476288	C	T	splice_donor_variant	coding	MRE11	NM_005591.4	c.659+1G>A	-	Pathogenic/Likely_pathogenic	rs759130031	.	1.66e-05	2.04e-05	.	.	Hereditary_cancer-predisposing_syndrome|Ataxia-telangiectasia-like_disorder_1	RCV000217276.1|RCV000410656.1	CHN, JPN, KOR(EAS_KOR), EAS_OEA	4
13	32333284	32333284	A	-	frameshift_variant	coding	BRCA2	NM_000059.4	c.1813del	p.Ile605TyrfsTer9	Pathogenic	rs80359309	.	.	3.52e-05	COSM4666030;COSM4666031	1(large_intestine);1(biliary_tract)	Breast-ovarian_cancer\x2c_familial_2|not_provided|Hereditary_cancer-predisposing_syndrome|Hereditary_breast_and_ovarian_cancer_syndrome	RCV000031344.10|RCV000043896.5|RCV000132177.3|RCV000203637.2	AMR, NFE_NWE, NFE_ONF, SAS	4
13	32337899	32337900	TT	-	frameshift_variant	coding	BRCA2	NM_000059.4	c.3545_3546del	p.Phe1182Ter	Pathogenic	rs80359388	.	3.3e-05	2.04e-05	.	.	Breast-ovarian_cancer\x2c_familial_2|Hereditary_breast_and_ovarian_cancer_syndrome|not_provided|Hereditary_cancer-predisposing_syndrome|Inborn_genetic_diseases	RCV000031427.12|RCV000044219.4|RCV000074527.7|RCV000131093.3|RCV000210566.1	NFE_BGR, NFE_NWE, NFE_SEU, NFE_ONF	4
13	32338201	32338202	TG	-	frameshift_variant	coding	BRCA2	NM_000059.4	c.3847_3848del	p.Val1283LysfsTer2	Pathogenic	rs80359405	.	0.0001	4.47e-05	.	.	Breast-ovarian_cancer\x2c_familial_2|Hereditary_breast_and_ovarian_cancer_syndrome|Hereditary_cancer-predisposing_syndrome|Familial_cancer_of_breast	RCV000031440.8|RCV000044280.8|RCV000131095.3|RCV000160281.1	KOR(KOVA), NFE_SEU, NFE_SWE, NFE_ONF	4
13	32339421	32339421	-	A	frameshift_variant	coding	BRCA2	NM_000059.4	c.5073dup	p.Trp1692MetfsTer3	Pathogenic	rs80359480	.	8.47e-06	1.76e-05	COSM5078975;COSM5078974	1(large_intestine)	Breast-ovarian_cancer\x2c_familial_2|Hereditary_breast_and_ovarian_cancer_syndrome|Hereditary_cancer-predisposing_syndrome|not_provided|not_specified	RCV000031524.9|RCV000044550.8|RCV000130743.4|RCV000160294.3|RCV000238830.1	CHN, ASJ, NFE_NWE, NFE_ONF	4
13	32339929	32339932	AATT	-	frameshift_variant	coding	BRCA2	NM_000059.4	c.5576_5579del	p.Ile1859LysfsTer3	Pathogenic	rs80359521	.	3.32e-05	1.67e-05	COSM5514090;COSM5514089	1(biliary_tract)	Breast-ovarian_cancer\x2c_familial_2|Hereditary_breast_and_ovarian_cancer_syndrome|Hereditary_cancer-predisposing_syndrome|not_provided	RCV000031556.11|RCV000044684.6|RCV000131118.4|RCV000160296.4	JPN, KOR(EAS_KOR), AFR, NFE_ONF	4
13	32340000	32340000	C	A	stop_gained	coding	BRCA2	NM_000059.4	c.5645C>A	p.Ser1882Ter	Pathogenic	rs80358785	.	2.49e-05	1.23e-05	COSM78887;COSM946826	1(ovary);1(endometrium)	Breast-ovarian_cancer\x2c_familial_2|not_provided|Hereditary_cancer-predisposing_syndrome|Hereditary_breast_and_ovarian_cancer_syndrome|Breast_cancer\x2cWilms_tumor_1|Glioma_susceptibility_3|Medulloblastoma|Familial_cancer_of_breast|Breast-ovarian_cancer\x2c_familial_2	RCV000031565.8|RCV000044705.6|RCV000131114.3|RCV000167830.3|RCV000240722.1\x2cRCV000009937.5|RCV000009938.5|RCV000009939.5|RCV000044706.2|RCV000113452.3	EAS_OEA, NFE_NWE, NFE_SWE, NFE_ONF	4
13	32340301	32340301	T	-	frameshift_variant	coding	BRCA2	NM_000059.4	c.5946del	p.Ser1982ArgfsTer22	Pathogenic	rs80359550	.	0.0003	0.0003	COSM328000;COSM26515	1(pancreas)	Breast-ovarian_cancer\x2c_familial_2|Pancreatic_cancer_2|Fanconi_anemia\x2c_complementation_group_D1|Hereditary_breast_and_ovarian_cancer_syndrome|Familial_cancer_of_breast|Hereditary_cancer-predisposing_syndrome|not_provided|BRCA2-Related_Disorders|Breast_cancer	RCV000009910.15|RCV000009911.4|RCV000009912.4|RCV000034451.8|RCV000044800.9|RCV000129627.4|RCV000212245.3|RCV000367838.1|RCV000414179.1	ASJ, NFE_BGR, NFE_SEU, NFE_ONF	4
13	32340630	32340631	TT	-	frameshift_variant	coding	BRCA2	NM_000059.4	c.6275_6276del	p.Leu2092ProfsTer7	Pathogenic	rs11571658	.	1.67e-05	3.35e-05	.	.	Breast-ovarian_cancer\x2c_familial_2|Hereditary_breast_and_ovarian_cancer_syndrome|Hereditary_cancer-predisposing_syndrome|not_provided	RCV000009903.14|RCV000044884.7|RCV000131029.4|RCV000160300.3	AMR, FIN, NFE_NWE, NFE_ONF	4
13	32354921	32354922	TC	-	frameshift_variant	coding	BRCA2	NM_000059.4	c.7069_7070del	p.Leu2357ValfsTer2	Pathogenic	rs80359636	.	3.3e-05	2.03e-05	.	.	Breast-ovarian_cancer\x2c_familial_2|not_provided|Hereditary_cancer-predisposing_syndrome|Hereditary_breast_and_ovarian_cancer_syndrome	RCV000031664.9|RCV000045136.7|RCV000131032.4|RCV000195404.4	NFE_BGR, NFE_NWE, NFE_SWE, NFE_ONF	4
14	45159189	45159189	-	A	frameshift_variant	coding	FANCM	NM_020937.4	c.1491dup	p.Gln498ThrfsTer7	Pathogenic/Likely_pathogenic	rs797045116	.	3.35e-05	4.47e-05	.	.	not_provided	RCV000190644.1	FIN, NFE_BGR, NFE_SWE, NFE_ONF	4
15	30905584	30905585	TG	-	frameshift_variant	coding	FAN1	NM_014967.5	c.922_923del	p.Val308CysfsTer5	Pathogenic/Likely_pathogenic	rs774499986	.	0.0001	0.0001	COSM433692;COSM5215903	1(breast)	.	.	NFE_NWE, NFE_SEU, NFE_SWE, NFE_ONF	4
15	30925199	30925199	C	T	stop_gained	coding	FAN1	NM_014967.5	c.2245C>T	p.Arg749Ter	Pathogenic	rs387907279	0.0002	1.65e-05	2.84e-05	.	.	Interstitial_nephritis\x2c_karyomegalic	RCV000030744.5	EAS_OEA, FIN, NFE_NWE, NFE_ONF	4
15	90747491	90747491	G	C	splice_donor_variant	coding	BLM	NM_000057.4	c.98+1G>C	-	Pathogenic/Likely_pathogenic	rs750293380	.	4.25e-05	2.66e-05	.	.	Bloom_syndrome\x2cBloom_syndrome	RCV000409688.1\x2cRCV000410622.1	NFE_NWE, NFE_SEU, NFE_SWE, NFE_ONF	4
15	90766923	90766925	ATC	-	inframe_deletion	coding	BLM	NM_000057.4	c.2207_2209del	p.Tyr736del	Pathogenic	rs750667270	.	0.0001	0.0002	.	.	.	.	AMR, ASJ, NFE_NWE, NFE_ONF	4
15	90790747	90790747	C	-	frameshift_variant	coding	BLM	NM_000057.4	c.2923del	p.Gln975LysfsTer24	Pathogenic	rs752505986	.	4.12e-05	3.25e-05	.	.	Bloom_syndrome|not_provided	RCV000034902.2|RCV000115301.3	FIN, NFE_NWE, NFE_SWE, NFE_ONF	4
16	13926750	13926755	GGCCAA	-	inframe_deletion,splice_region_variant	coding	ERCC4	NM_005236.3	c.580_584+1del	-	Likely_pathogenic	rs776329282	.	6.59e-05	5.69e-05	.	.	.	.	FIN, NFE_NWE, NFE_SWE, NFE_ONF	4
16	23637886	23637889	ACAA	-	frameshift_variant	coding	PALB2	NM_024675.4	c.172_175del	p.Gln60ArgfsTer7	Pathogenic/Likely_pathogenic	rs180177143	.	3.3e-05	3.66e-05	.	.	Familial_cancer_of_breast|Pancreatic_cancer_3|Hereditary_cancer-predisposing_syndrome|not_provided	RCV000114496.4|RCV000114497.3|RCV000116073.7|RCV000212770.3	ASJ, NFE_NWE, NFE_SWE, NFE_ONF	4
16	3589378	3589378	-	G	frameshift_variant	coding	SLX4	NM_032444.4	c.4259dup	p.Ile1421AsnfsTer4	Pathogenic	rs781663547	.	1.8e-05	1.28e-05	.	.	.	.	CHN, JPN, NFE_NWE, NFE_SEU	4
16	89746848	89746848	T	C	missense_variant	coding	FANCA	NM_000135.4	c.3391A>G	p.Thr1131Ala	Pathogenic/Likely_pathogenic	rs574034197	.	7.7e-05	7.19e-05	.	.	Fanconi_anemia	RCV000230300.2	AMR, FIN, NFE_NWE, NFE_ONF	4
16	89761949	89761949	C	T	missense_variant,splice_region_variant	coding	FANCA	NM_000135.4	c.2852G>A	p.Arg951Gln	Pathogenic/Likely_pathogenic	rs755922289	.	4.94e-05	5.69e-05	.	.	.	.	KOR(EAS_KOR), NFE_NWE, NFE_SEU, NFE_ONF	4
16	89761950	89761950	G	A	missense_variant,splice_region_variant	coding	FANCA	NM_000135.4	c.2851C>T	p.Arg951Trp	Pathogenic	rs755546887	.	8.24e-06	2.44e-05	COSM3691278	1(large_intestine)	Fanconi_anemia	RCV000466964.1	CHN, AMR, NFE_SEU, NFE_ONF	4
16	89815912	89815912	G	A	stop_gained	coding	FANCA	NM_000135.4	c.154C>T	p.Arg52Ter	Pathogenic	rs773159223	.	8.24e-06	1.62e-05	.	.	Fanconi_anemia\x2c_complementation_group_A	RCV000409456.1	AFR, EAS_OEA, NFE_NWE, SAS	4
16	89816614	89816614	A	G	start_lost	coding	FANCA	NM_000135.4	c.2T>C	p.Met1?	Pathogenic	rs769479800	.	8.25e-05	4.27e-05	.	.	.	.	CHN, AFR, NFE_ONF, SAS	4
17	35106406	35106406	G	A	stop_gained	coding	RAD51D	NM_002878.3	c.556C>T	p.Arg186Ter	Pathogenic	rs387906843	.	5.28e-05	2.87e-05	.	.	Breast-ovarian_cancer\x2c_familial_4|Hereditary_cancer-predisposing_syndrome	RCV000023220.4|RCV000129358.3	ASJ, NFE_NWE, NFE_SEU, NFE_ONF	4
17	35107439	35107439	-	TA	frameshift_variant	coding	RAD51D	NM_002878.3	c.270_271dup	p.Lys91IlefsTer13	Pathogenic/Likely_pathogenic	rs753862052	.	7.42e-05	5.69e-05	.	.	Breast-ovarian_cancer\x2c_familial_4	RCV000226442.2	CHN, JPN, KOR(EAS_KOR), EAS_OEA	4
17	58692733	58692733	G	-	frameshift_variant	coding	RAD51C	NM_058216.3	c.93del	p.Phe32SerfsTer8	Pathogenic	rs763897044	.	9.07e-05	5.28e-05	.	.	Breast-ovarian_cancer\x2c_familial_3|Hereditary_cancer-predisposing_syndrome|Fanconi_anemia\x2c_complementation_group_O|not_provided	RCV000024266.3|RCV000160936.3|RCV000205375.2|RCV000212931.1	FIN, NFE_SEU, NFE_SWE, NFE_ONF	4
17	58703201	58703201	C	T	stop_gained	coding	RAD51C	NM_058216.3	c.577C>T	p.Arg193Ter	Pathogenic/Likely_pathogenic	rs200293302	.	4.14e-05	4.07e-05	.	.	Hereditary_cancer-predisposing_syndrome|Fanconi_anemia\x2c_complementation_group_O|not_provided	RCV000129056.6|RCV000203684.3|RCV000212943.3	AMR, NFE_NWE, NFE_ONF, SAS	4
17	58709857	58709857	A	G	splice_acceptor_variant	coding	RAD51C	NM_058216.3	c.706-2A>G	-	Pathogenic/Likely_pathogenic	rs587780259	.	2.47e-05	2.03e-05	.	.	Hereditary_cancer-predisposing_syndrome|Fanconi_anemia\x2c_complementation_group_O|not_provided|Breast-ovarian_cancer\x2c_familial_3	RCV000116178.5|RCV000234445.2|RCV000254687.2|RCV000456123.1	NFE_BGR, NFE_NWE, NFE_SEU, NFE_SWE	4
17	61684053	61684056	TTTG	-	frameshift_variant	coding	BRIP1	NM_032043.3	c.2990_2993del	p.Thr997ArgfsTer61	Pathogenic/Likely_pathogenic	rs771028677	.	1.65e-05	3.25e-05	.	.	not_provided|Familial_cancer_of_breast|Fanconi_anemia\x2c_complementation_group_J|Hereditary_cancer-predisposing_syndrome|Fanconi_anemia\x2c_complementation_group_J|Neoplasm_of_ovary	RCV000214087.2|RCV000230820.2|RCV000230820.2|RCV000234901.1|RCV000410664.1|RCV000411728.1	KOR(EAS_KOR), NFE_NWE, NFE_SEU, NFE_SWE	4
17	7673802	7673802	C	T	missense_variant	coding	TP53	NM_000546.6	c.818G>A	p.Arg273His	Pathogenic	rs28934576	0.0002	2.63e-05	1.63e-05	COSM1645335;COSM10660;COSM99729;COSM3356963	2(salivary_gland);3(vulva);59(ovary);8(bone);85(breast);4(penis);2(NS);42(haematopoietic_and_lymphoid_tissue);30(stomach);19(urinary_tract);3(soft_tissue);43(pancreas);5(liver);2(genital_tract);43(oesophagus);13(skin);12(prostate);78(lung);1(cervix);48(upper_aerodigestive_tract);2(thymus);177(large_intestine);60(central_nervous_system);6(biliary_tract);1(fallopian_tube);14(endometrium)	Pancreatic_adenocarcinoma|Neoplasm_of_brain|Squamous_cell_carcinoma_of_the_head_and_neck|Chronic_lymphocytic_leukemia|Colorectal_Neoplasms|Adenocarcinoma_of_lung|Medulloblastoma|Adrenocortical_Carcinoma|Malignant_melanoma_of_skin|Brainstem_glioma|Malignant_neoplasm_of_body_of_uterus|Adenocarcinoma_of_prostate|Acute_myeloid_leukemia|Oesophageal_carcinoma|Hepatocellular_carcinoma|Small_cell_lung_ca…	RCV000418536.1|RCV000418738.1|RCV000421259.1|RCV000423490.1|RCV000423633.1|RCV000423981.1|RCV000425890.1|RCV000426132.1|RCV000427314.1|RCV000428692.1|RCV000429444.1|RCV000431067.1|RCV000433315.1|RCV000434296.1|RCV000434695.1|RCV000435767.1|RCV000436818.1|RCV000437048.1|RCV000438507.1|RCV000441792.1|RCV000442241.1|RCV000444109.1|RCV000444782.1|RCV000444989.1\x2cRCV000222860.1|RCV000418732.1|RCV000…	ICE, ASJ, NFE_NWE, NFE_SEU	4
19	12813149	12813149	G	A	missense_variant	coding	RNASEH2A	NM_006397.3	c.704G>A	p.Arg235Gln	Pathogenic	rs75718910	.	8.3e-06	1.63e-05	.	.	Aicardi_Goutieres_syndrome_4	RCV000056303.5	ICE, AMR, NFE_NWE, NFE_SEU	4
19	45365053	45365053	G	A	stop_gained	coding	ERCC2	NM_000400.4	c.466C>T	p.Arg156Ter	Pathogenic	rs151235136	0.0002	1.67e-05	8.15e-06	.	.	.	.	CHN, FIN, NFE_NWE, NFE_SEU	4

## Sheet: S3E
Supplementary Table 3E. Deleterious variants shared in 5 populations
Chr	Start	End	Ref	Alt	Consequence	Region	Symbol	Feature	HGVSc	HGVSp	ClinVar_SIG_20210501	dbSNP	1000G_ALL	ExAC_Freq	gnomAD_exome_ALL	COSMIC_ID	COSMIC_DIS	ClinVar_DIS	ClinVar_ID	Shared_ethnicity	Total
1	45331219	45331221	TCC	-	inframe_deletion	coding	MUTYH	NM_001048174.2	c.1353_1355del	p.Glu452del	Pathogenic	rs587778541	.	0.0001	9.34e-05	.	.	Hereditary_cancer-predisposing_syndrome|not_specified|MYH-associated_polyposis|not_provided	RCV000115758.6|RCV000121599.1|RCV000123145.6|RCV000212719.2	NFE_BGR, NFE_NWE, NFE_SEU, NFE_ONF, SAS	5
1	45331514	45331514	-	CC	frameshift_variant	coding	MUTYH	NM_001048174.2	c.1143_1144dup	p.Glu382GlyfsTer43	Pathogenic/Likely_pathogenic	rs587780078	.	5.82e-05	0.0002	.	.	Hereditary_cancer-predisposing_syndrome|Carcinoma_of_colon|MYH-associated_polyposis|not_provided	RCV000115749.6|RCV000144636.1|RCV000191935.4|RCV000235187.1	AMR, ASJ, NFE_NWE, NFE_SEU, NFE_ONF	5
1	45331529	45331529	G	A	missense_variant	coding	MUTYH	NM_001048174.2	c.1130C>T	p.Pro377Leu	Pathogenic	rs529008617	0.0002	0.0001	7.33e-05	.	.	Hereditary_cancer-predisposing_syndrome|Carcinoma_of_colon|MYH-associated_polyposis|not_provided	RCV000131914.3|RCV000144633.1|RCV000191934.2|RCV000413961.1	AMR, NFE_NWE, NFE_SWE, NFE_ONF, SAS	5
1	45332458	45332458	G	A	missense_variant	coding	MUTYH	NM_001048174.2	c.637C>T	p.Arg213Trp	Pathogenic/Likely_pathogenic	rs34126013	.	9.2e-05	6.92e-05	.	.	Hereditary_cancer-predisposing_syndrome|not_provided|MYH-associated_polyposis	RCV000164664.2|RCV000235834.1|RCV000369240.1	AMR, NFE_NWE, NFE_SEU, NFE_SWE, SAS	5
1	45333436	45333436	G	A	missense_variant	coding	MUTYH	NM_001048174.2	c.241C>T	p.Arg81Trp	Pathogenic/Likely_pathogenic	rs765123255	.	4.94e-05	3.66e-05	.	.	Hereditary_cancer-predisposing_syndrome|MYH-associated_polyposis|not_provided	RCV000162761.2|RCV000230772.3|RCV000442590.1	AMR, NFE_NWE, NFE_SEU, NFE_SWE, SAS	5
1	45333449	45333449	G	T	stop_gained	coding	MUTYH	NM_001048174.2	c.228C>A	p.Tyr76Ter	Pathogenic	rs121908380	.	0.0001	0.0001	.	.	MYH-associated_polyposis|Hereditary_cancer-predisposing_syndrome|not_specified\x2cMYH-associated_polyposis|Hereditary_cancer-predisposing_syndrome	RCV000119223.7|RCV000126890.5|RCV000177119.1\x2cRCV000005617.5|RCV000163049.2	NFE_NWE, NFE_SEU, NFE_SWE, NFE_ONF, SAS	5
1	46270754	46270754	C	T	missense_variant	coding	RAD54L	NM_003579.4	c.1138C>T	p.Arg380Trp	Pathogenic	rs150138364	.	7.41e-05	5.28e-05	COSM1470199	1(prostate)	.	.	CHN, NFE_NWE, NFE_SWE, NFE_ONF, SAS	5
2	3550458	3550458	C	T	missense_variant	coding	RNASEH1	NM_002936.6	c.424G>A	p.Val142Ile	Likely_pathogenic	rs766294940	.	4.96e-05	4.06e-05	.	.	Progressive_external_ophthalmoplegia_with_mitochondrial_DNA_deletions\x2c_autosomal_recessive_2	RCV000412621.1	CHN, AMR, NFE_SEU, NFE_ONF, SAS	5
3	10067267	10067267	G	A	missense_variant	coding	FANCD2	NM_001018115.3	c.2444G>A	p.Arg815Gln	Pathogenic	rs766567785	.	0.0001	0.0001	.	.	Fanconi_anemia	RCV000234321.2	CHN, AMR, NFE_NWE, NFE_SEU, NFE_ONF	5
7	6005918	6005918	C	A	missense_variant	coding	PMS2	NM_000535.7	c.137G>T	p.Ser46Ile	Likely_pathogenic	rs121434629	.	0.0001	0.0002	.	.	Turcot_syndrome|Hereditary_nonpolyposis_colorectal_cancer_type_4|Lynch_syndrome|Hereditary_cancer-predisposing_syndrome|not_provided\x2cLynch_syndrome	RCV000009826.7|RCV000056324.5|RCV000076807.6|RCV000115657.7|RCV000200994.3\x2cRCV000076806.2	AMR, NFE_NWE, NFE_SEU, NFE_SWE, NFE_ONF	5
9	95101742	95101742	G	A	stop_gained	coding	FANCC	NM_000136.3	c.1642C>T	p.Arg548Ter	Pathogenic/Likely_pathogenic	rs104886457	.	2.49e-05	5.28e-05	COSM1206492	1(large_intestine)	Fanconi_anemia\x2c_complementation_group_C|not_provided|Fanconi_anemia	RCV000012827.4|RCV000058924.3|RCV000205197.3	CHN, JPN, ASJ, NFE_NWE, SAS	5
9	97675579	97675579	G	A	stop_gained	coding	XPA	NM_000380.4	c.682C>T	p.Arg228Ter	Pathogenic	rs104894132	.	0.0002	0.0003	.	.	Xeroderma_pigmentosum\x2c_type_1	RCV000001050.3	AMR, FIN, NFE_NWE, NFE_SEU, NFE_SWE	5
10	49482689	49482689	G	A	stop_gained,splice_region_variant	coding	ERCC6	NM_000124.4	c.2167C>T	p.Gln723Ter	Pathogenic	rs151242354	.	4.14e-05	7.31e-05	.	.	Cockayne_syndrome_B|not_provided	RCV000170378.1|RCV000256036.1	CHN, AFR, NFE_NWE, NFE_SEU, NFE_ONF	5
10	68431936	68431936	C	T	missense_variant	coding	DNA2	NM_001080449.3	c.1909G>A	p.Val637Ile	Pathogenic	rs746522359	.	2.48e-05	3.66e-05	.	.	.	.	ICE, FIN, NFE_EST, NFE_SEU, NFE_ONF	5
11	108259022	108259022	C	T	stop_gained	coding	ATM	NM_000051.4	c.2413C>T	p.Arg805Ter	Pathogenic	rs780619951	.	4.99e-05	4.06e-05	COSM1183959;COSM1183958	1(salivary_gland);1(large_intestine)	Ataxia-telangiectasia_syndrome|Hereditary_cancer-predisposing_syndrome	RCV000199790.3|RCV000221009.1	CHN, EAS_OEA, NFE_SEU, NFE_ONF, SAS	5
13	102875580	102875580	G	T	stop_gained	coding	ERCC5	NM_000123.4	c.3238G>T	p.Gly1080Ter	Likely_pathogenic	rs9514067	0.001	0.0001	0.0001	.	.	not_specified\x2cXeroderma_pigmentosum\x2c_group_G	RCV000120846.1\x2cRCV000190581.1	EAS_OEA, NFE_NWE, NFE_SEU, NFE_ONF, SAS	5
13	102875580	102875580	G	T	stop_gained	coding	BIVM-ERCC5	NM_001204425.2	c.4600G>T	p.Gly1534Ter	Likely_pathogenic	rs9514067	0.001	0.0001	0.0001	.	.	not_specified\x2cXeroderma_pigmentosum\x2c_group_G	RCV000120846.1\x2cRCV000190581.1	EAS_OEA, NFE_NWE, NFE_SEU, NFE_ONF, SAS	5
15	30929226	30929226	A	-	frameshift_variant	coding	FAN1	NM_014967.5	c.2616del	p.Asp873ThrfsTer17	Pathogenic	rs750056424	.	0.0001	0.0001	.	.	.	.	NFE_BGR, NFE_NWE, NFE_SEU, NFE_SWE, SAS	5
16	13935697	13935697	C	T	missense_variant	coding	ERCC4	NM_005236.3	c.1765C>T	p.Arg589Trp	Pathogenic/Likely_pathogenic	rs147105770	.	6.6e-05	5.74e-05	.	.	Xeroderma_pigmentosum\x2c_type_f/Cockayne_syndrome	RCV000049250.27	AFR, AMR, NFE_NWE, NFE_SWE, NFE_ONF	5
16	89792034	89792037	CCAA	-	frameshift_variant	coding	FANCA	NM_000135.4	c.1115_1118del	p.Val372AlafsTer42	Pathogenic	rs397507552	.	5.77e-05	6.5e-05	.	.	Fanconi_anemia\x2c_complementation_group_A|Fanconi_anemia	RCV000003609.4|RCV000463426.1	AFR, NFE_NWE, NFE_SEU, NFE_SWE, NFE_ONF	5
16	89795922	89795925	GTGA	-	frameshift_variant	coding	FANCA	NM_000135.4	c.987_990del	p.His330AlafsTer4	Pathogenic	rs772359099	.	3.3e-05	3.66e-05	.	.	.	.	AMR, EAS_OEA, NFE_NWE, NFE_SEU, SAS	5
[truncated: 12 more rows]

## Sheet: S3F
Supplementary Table 3F. Deleterious variants shared in 6 populations
[truncated: 25 more rows]

## Sheet: S3G
Supplementary Table 3G. Deleterious variants shared in 7 populations
[truncated: 9 more rows]

[truncated: 6 more sheets: S3H, S3I, S3J, S3K, S3L, S3M]
