# Supplementary material for: Distinct landscapes of deleterious variants in DNA damage repair system in ethnic human populations
Source: Life Sci Alliance. 2022 May 20;5(9):e202101319. doi: 10.26508/lsa.202101319 (PMC9122833; doi:10.26508/lsa.202101319)
Supplement: Supplementary file 6 [file LSA-2021-01319_TableS6.xlsx]

## Sheet: Sheet1
Supplementary Table 6. Desease and inheritance types of DDR deleterious variants
Disease	Gene	Inheritance
Bone marrow failure syndrome; Li-Fraumeni syndrome; Colorectal cancer	TP53	AD
Breast cancer	BARD1	AD
Breast cancer	PALB2	AD
Breast cancer	RAD54L	AD
Breast cancer, early-onset	BRIP1	AD
Breast cancer; Colorectal cancer; Prostate cancer, familial	CHEK2	AD
Breast-ovarian cancer	RAD51D*	AD
Breast-ovarian cancer, familial	BRCA1	AD
Breast-ovarian cancer, familial	BRCA2	AD
Colorectal cancer	POLE	AD
Cutaneous telangiectasia and cancer syndrome	ATR	AD
Deafness, autosomal dominant	MCM2	AD
Endometrial cancer,	MLH3	AD
Fanconi anemia	RAD51	AD
Hereditary Breast Ovarian Cancer Syndrome, Leiomyoma	RAD51B*	AD
Lymphoma, Non-Hodgkin, Familial and Colorectal Cancer	RAD54B*	AD
Moebius Syndrome and Lymph Node Carcinoma	REV3L*	AD
Pregnancy loss	SYCP3	AD
Premature ovarian failure 11; Lung cancer; UV-sensitive syndrome	ERCC6	AD
Progressive external ophthalmoplegia with mitochondrial DNA deletions	DNA2	AD
Aicardi-Goutieres Syndrome 1 and Chilblain Lupus 1	ATRIP*	AD; AR
Breast cancer; Ataxia-telangiectasia	ATM	AD; AR
Colorectal cancer; Mismatch repair cancer	MSH2	AD; AR
Colorectal cancer; Mismatch repair cancer	MSH6	AD; AR
Mimsmatch repair cancer syndrome 1/ Muir-Torre syndrome	MLH1	AD; AR
Prostate Cancer, Xeroderma Pigmentosum and Xeroderma PigmentosumVariant Type	POLK*	AD; AR
Werner Syndrome, Aicardi-Goutieres Syndrome	EXO1*	AD; AR
Adenomas, multiple colorectal	MUTYH	AR
Aicardi-Goutieres syndrome 2	RNASEH2B	AR
Aicardi-Goutieres syndrome 3	RNASEH2C	AR
Aicardi-Goutieres syndrome 4	RNASEH2A	AR
Ataxia-telangiectasia-like disorder	MRE11	AR
Ataxia-telangiectasia-like disorder 2	PCNA	AR
Bloom syndrome	BLM	AR
Cerebrooculofacioskeletal syndrome 4	ERCC1	AR
Cerebrooculofacioskeletal syndrome; Xeroderma pigmentosum	BIVM-ERCC5	AR
Cerebrooculofacioskeletal syndrome; Xeroderma pigmentosum	ERCC2	AR
Cerebrooculofacioskeletal syndrome; Xeroderma pigmentosum	ERCC5	AR
Cockayne syndrome	ERCC8	AR
Familial adenomatous polyposis	MSH3	AR
Familial adenomatous polyposis	NTHL1	AR
Fanconi anemia	FANCA	AR
Fanconi anemia	FANCC	AR
Fanconi anemia	FANCD2	AR
Fanconi anemia	FANCE	AR
Fanconi anemia	FANCF	AR
Fanconi anemia	FANCG	AR
Fanconi anemia	FANCI	AR
Fanconi anemia	FANCL	AR
Fanconi anemia	RAD51C	AR
Fanconi anemia	SLX4	AR
Fanconi anemia	XRCC2	AR
Fanconi anemia; Xeroderma pigmentosum	ERCC4	AR
Immunodeficiency	MCM4	AR
Immunodeficiency	PRKDC	AR
Immunodeficiency with hyper IgM	UNG	AR
Immunodeficiency, growth retardation, and radiation sensitive	NHEJ1*	AR
Interstitial nephritis	FAN1	AR
Jawad syndrome	RBBP8	AR
LIG4 syndrome	LIG4	AR
Meier-Gorlin syndrome	MCM5	AR
Mismatch repair cancer	PMS2	AR
Nijmegen breakage syndrome	NBN	AR
Nijmegen breakage syndrome-like disorder	RAD50	AR
Omenn syndrome	DCLRE1C	AR
Premature ovarian failure	FANCM	AR
Progressive external ophthalmoplegia with mitochondrial DNA deletions	RNASEH1	AR
Progressive external ophthalmoplegia with mitochondrial DNA deletions	TOP3A	AR
Riddle Syndrome and Arthrogryposis, Renal Dysfunction, And Cholestasis 1	UIMC1*	AR
Seckel Syndrome, Telangiectatic Osteogenic Sarcoma	PRIM1*	AR
Short stature, microcephaly, and endocrine dysfunction	XRCC4	AR
Spinocerebellar ataxia	XRCC1	AR
Trichothiodystrophy 2; Xeroderma pigmentosum	ERCC3	AR
Trichothiodystrophy 3	GTF2H5*	AR
UBE2T	UBE2T	AR
Xeroderma pigmentosum	POLH	AR
Xeroderma pigmentosum	DDB2	AR
Xeroderma pigmentosum	XPA	AR
Xeroderma pigmentosum	XPC	AR
You-Hoover-Fong syndrome	TELO2	AR
*All from MedGen (https://www.ncbi.nlm.nih.gov/medgen) but these from GeneCard (https://www.genecards.org/)
